# Supplementary material for: Membrane glycomics reveal heterogeneity and quantitative distribution of cell surface sialylation
Source: PubMed Central journal article supplement — Chem Sci. 2018 Jun 27;9(29):6271–85. doi: 10.1039/c8sc01875h (PMC6063140; doi:10.1039/c8sc01875h), 2018-06-27

## Membrane glycomics reveal heterogeneity and quantitative distribution of cell surface sialylation

Diane Dayoung Park<sup>a,b,\*</sup>, Gege Xu<sup>a</sup>, Maurice Wong<sup>a</sup>, Chatchai Phoomak<sup>c</sup>, Mingqi Liu<sup>d</sup>, Nathan E. Haigh<sup>e</sup>, Sopit Wongkham<sup>c</sup>, Pengyuan Yang<sup>d</sup>, Emanuel Maverakis<sup>e</sup>, Carlito B. Lebrilla<sup>a</sup>

<sup>a</sup>Department of Chemistry, University of California, Davis, CA 95616, USA

<sup>b</sup>Department of Surgery, Beth Israel Deaconess Medical Center, Harvard Medical School, Boston, MA 02115, USA. E-mail: [dpark4@bidmc.harvard.edu](mailto:dpark4@bidmc.harvard.edu)

<sup>c</sup>Department of Biochemistry, Faculty of Medicine, Khon Kaen University, Khon Kaen 40002, Thailand

<sup>d</sup>Department of Chemistry, Institutes of Biomedical Sciences, Fudan University, Shanghai 200032, China

<sup>e</sup>Department of Dermatology, University of California, Davis School of Medicine, Sacramento, CA 95817, USA

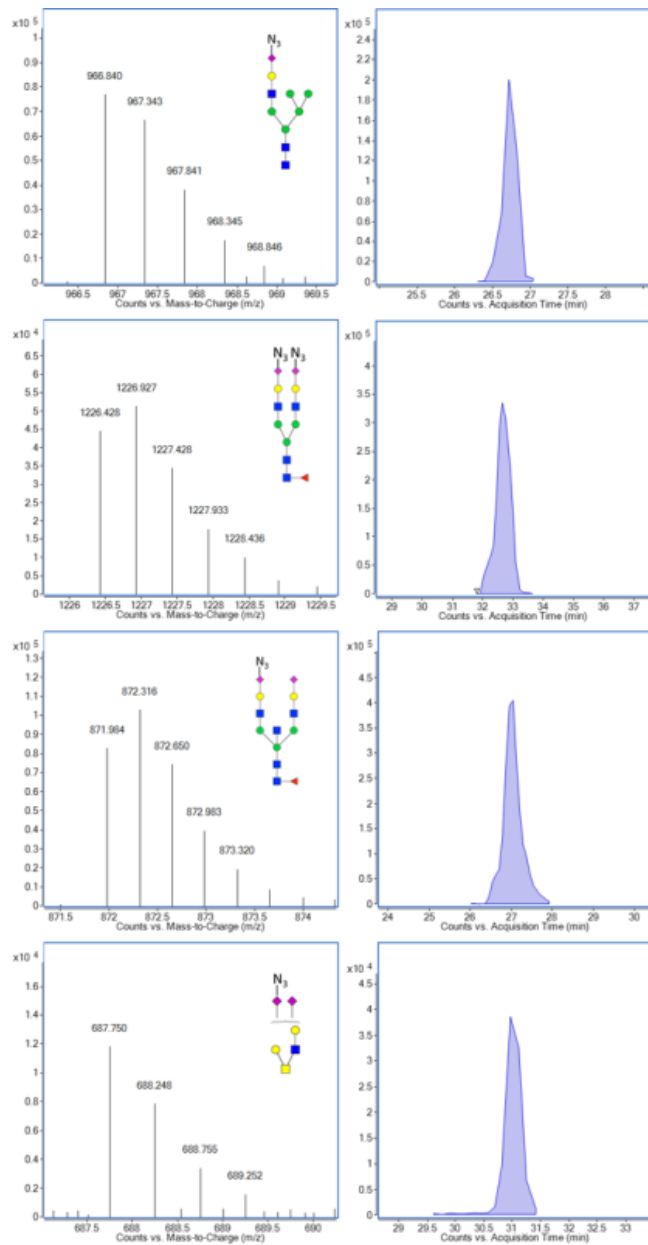

**Figure S1.** Identification and quantification of SiaNAz-containing glycans. Left panels: MS spectra showing isotopic distribution of representative SiaNAzylated N-glycans (hybrid, biantennary complex, and bisecting type) and O-glycans (disialylated core 2). Right panels: Chromatograms generated from the sum of ion counts of each specified glycan.

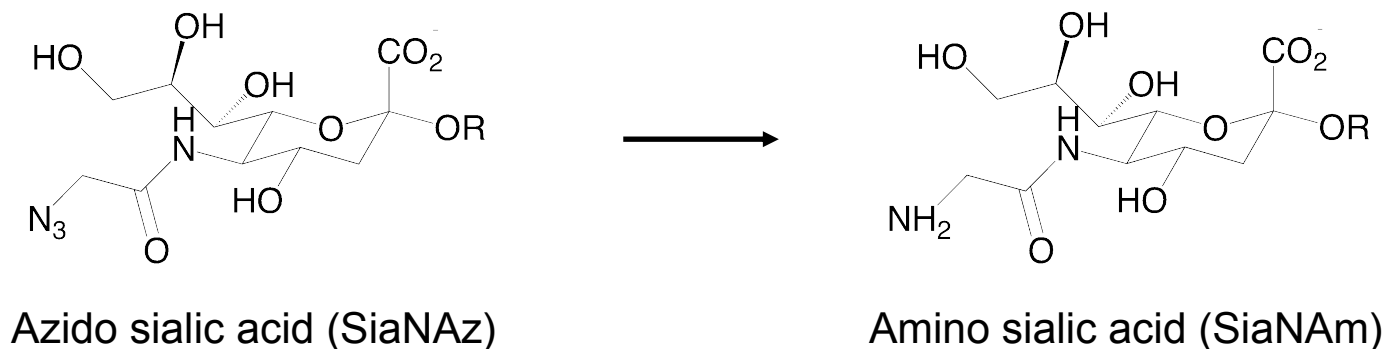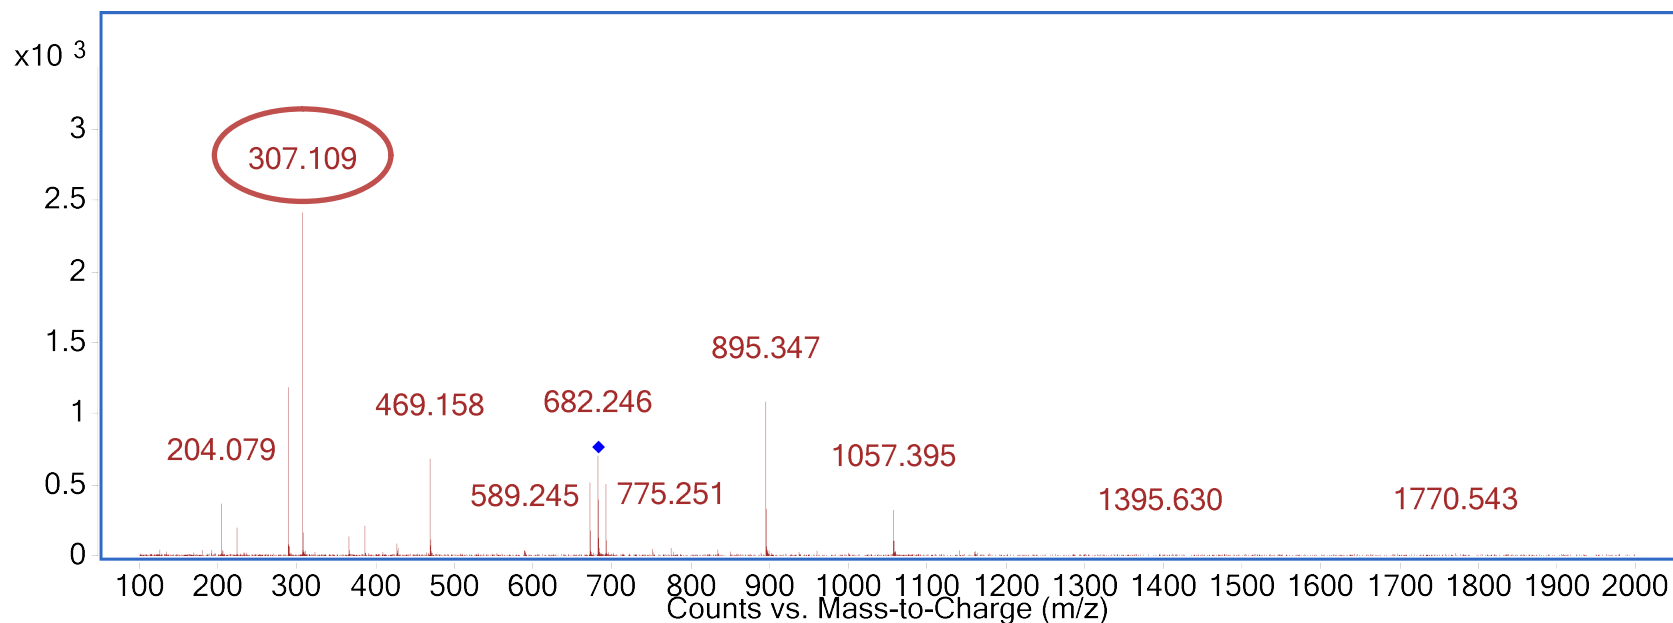

**Figure S2.** CID-MS/MS fragmentation spectrum of an O-glycan bearing a reduced SiaNAz residue. The red circle indicates the diagnostic ion representing an unnatural sialic acid that has undergone an azide to amine conversion. The blue diamond indicates the precursor ion ( $m/z$  682.260) corresponding to a glycan with composition Hex<sub>2</sub>HexNAc<sub>2</sub>SiaNAm<sub>2</sub>.

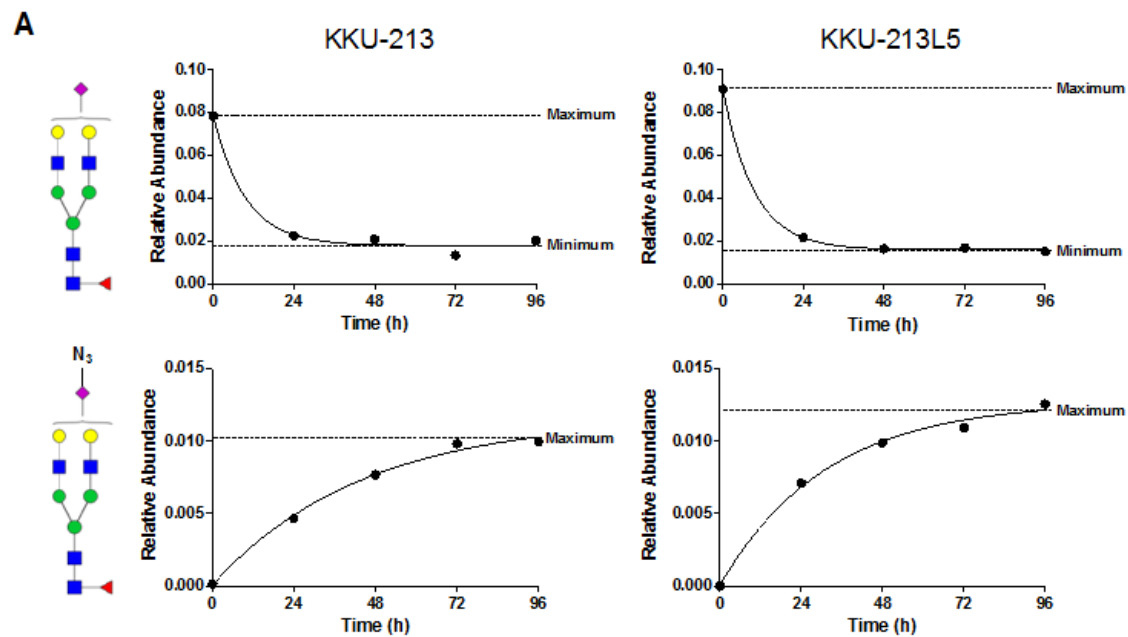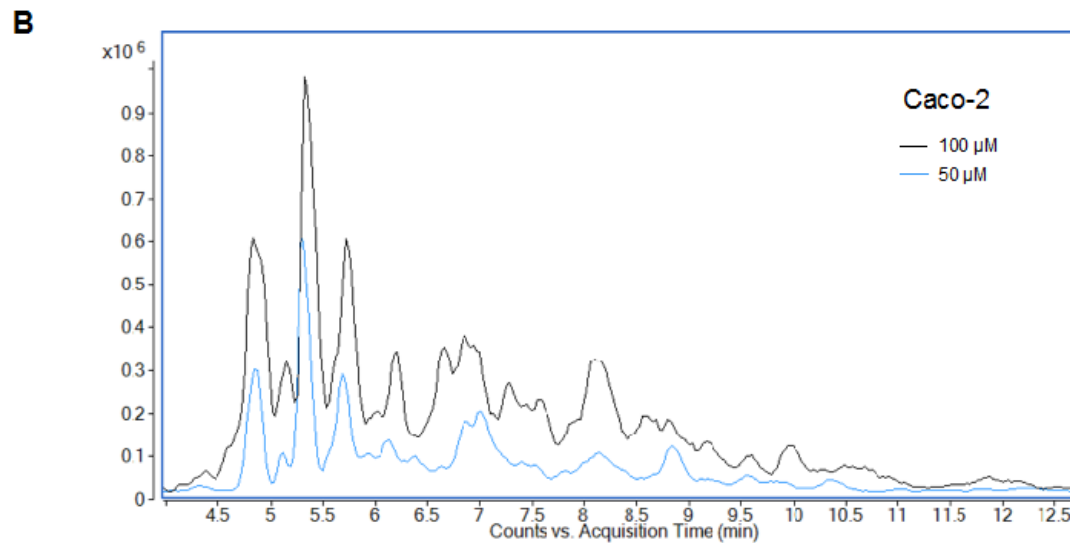

**Figure S3.** Optimization of ManNAz addition to cell lines. (A) Depletion of individual Sia-glycans and concurrent increase in the corresponding SiaNAz-glycans were monitored over time after ManNAz treatment. Relative abundances were calculated by normalizing ion counts to the total glycan abundances. (B) Increasing concentrations of ManNAz were added to cells until a maximal response was observed. An extracted compound chromatogram is shown per condition, in which the sum of all identified glycan compounds are outlined at their respective retention times.

| Cell Type | Tissue   | Disease                       | Native Cell Surface Sialylation | Maximal [ManNAz] ( $\mu\text{M}$ ) |
|-----------|----------|-------------------------------|---------------------------------|------------------------------------|
| Caco-2    | Colon    | Colorectal adenocarcinoma     | 78%                             | 100                                |
| PNT2      | Prostate | Normal                        | 45%                             | 50                                 |
| KKU-213   | Liver    | Cholangiocarcinoma            | 22%                             | 50                                 |
| KKU-213L5 | Liver    | Metastatic cholangiocarcinoma | 20%                             | 50                                 |

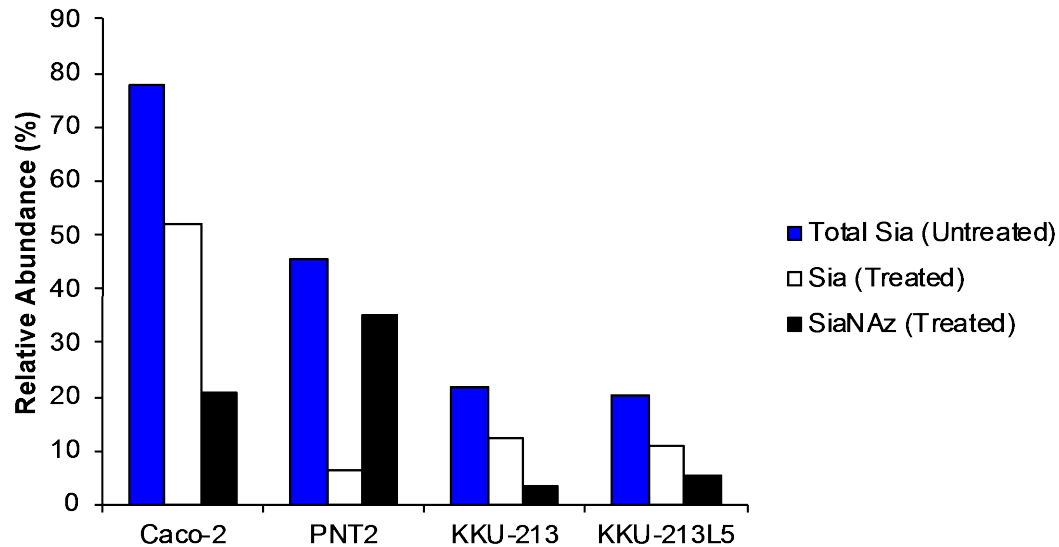

**Figure S4.** Measures of variability in SiaNAz incorporation onto cell surface N-glycans. The characteristics of enrolled cell lines are described in the table. Distribution of sialylated glycans are shown as unique to each cell. Relative abundances indicate the summed peak areas of specified glycan groups in untreated and ManNAz-treated cells. Conversion of ManNAz to SiaNAz and subsequent incorporation onto cell surface N-glycans are evident by the appearance of SiaNAzylated glycans in treated samples. Total sialylation levels between untreated and treated cells were comparable. Native sialylation levels did not dictate the extent of SiaNAz incorporation post-treatment. Fuc, fucosylated; Sia, sialylated (NeuAc); HM, high mannose.

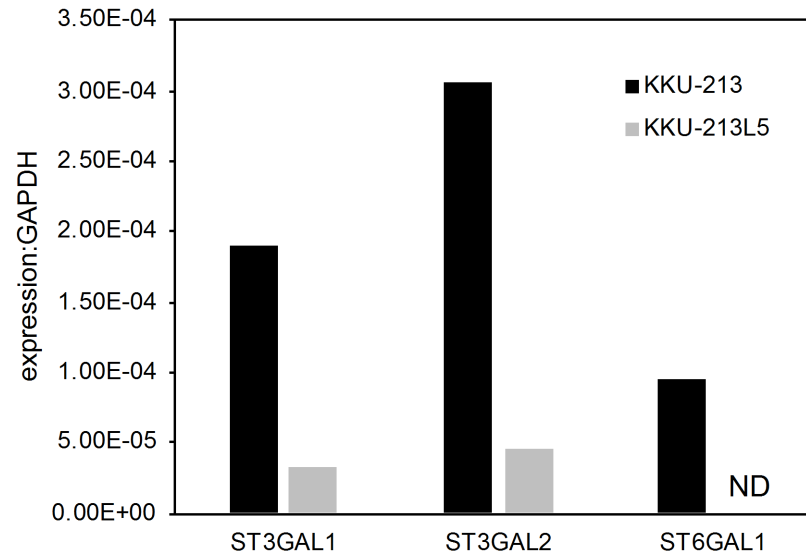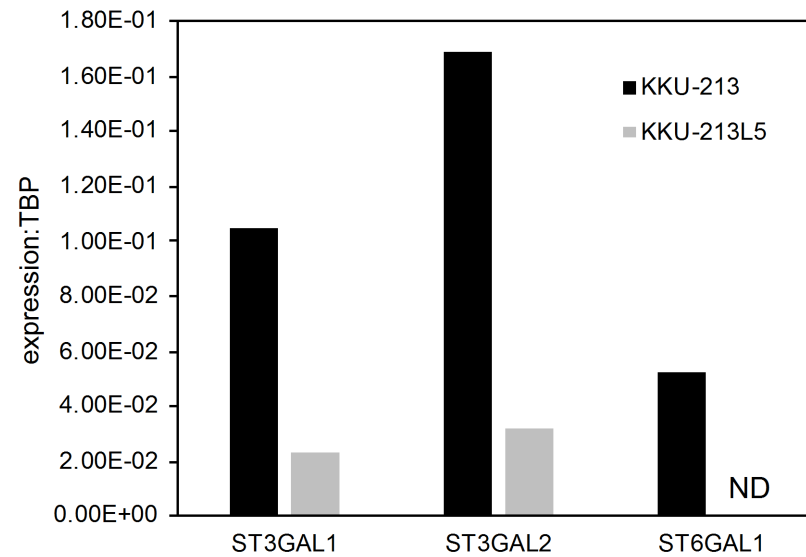

**Figure S5.** Q-RT-PCR of sialyltransferase genes in KKU-213 and KKU-213L5. Expression is normalized to GAPDH (top) and TBP (bottom). ND, not detectable.

# PNT2

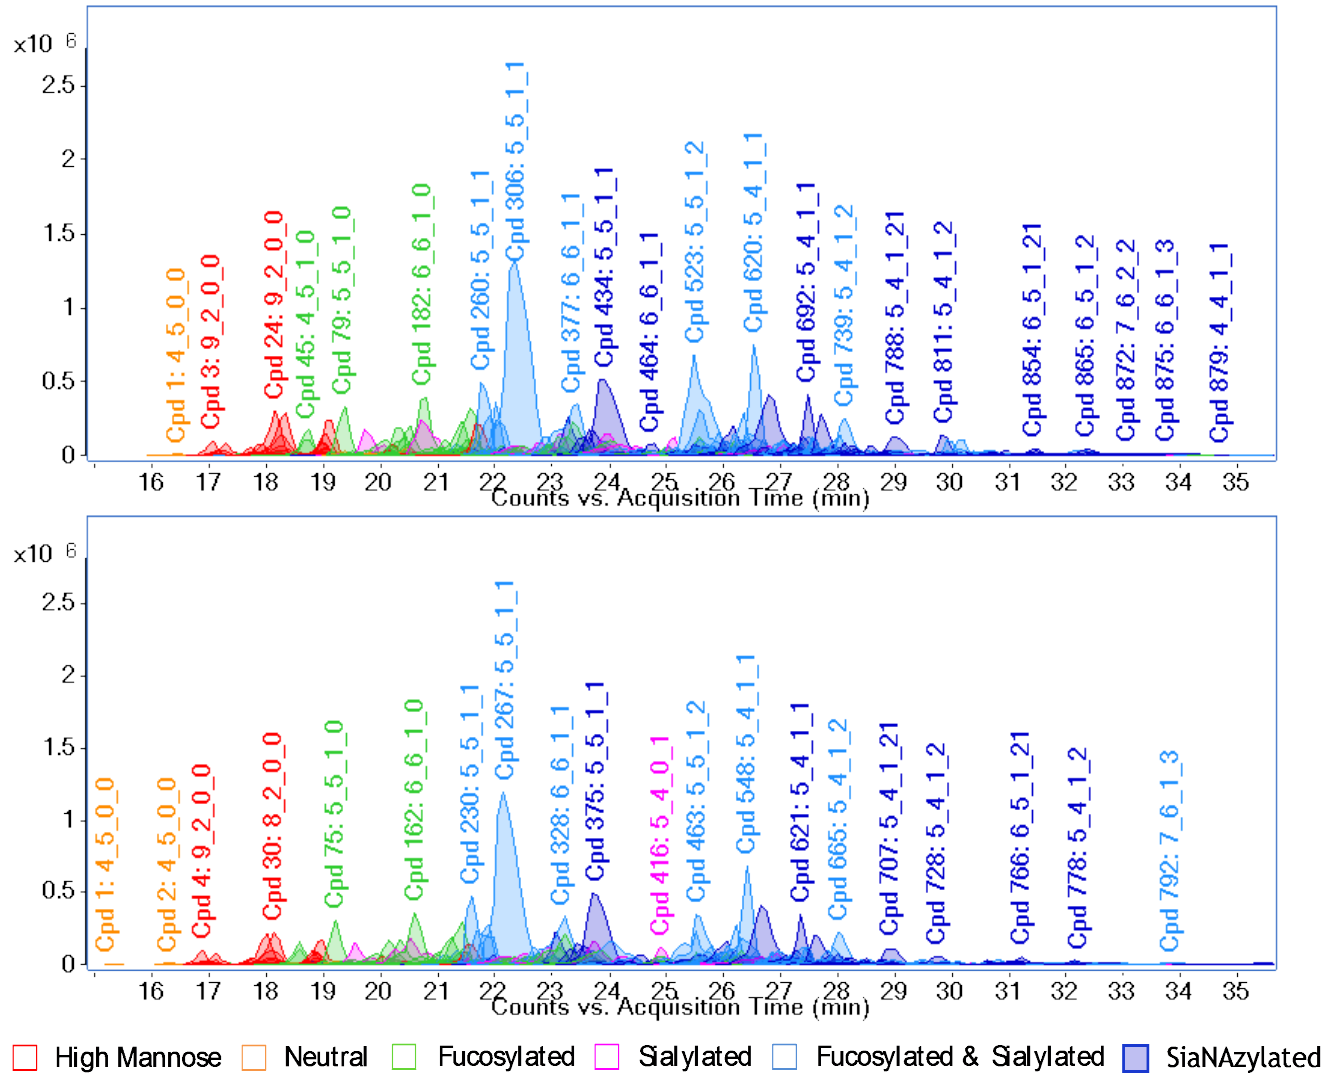

**Figure S6.** N-Glycans identified on PNT2 via PNGase F release from two independent experiments. Each peak in the chromatogram represents a unique glycan compound (Cpd). Peaks are colored according to glycan type. Notation is as follows: Hex\_HexNAc\_Fuc\_SiaSiaNAz.

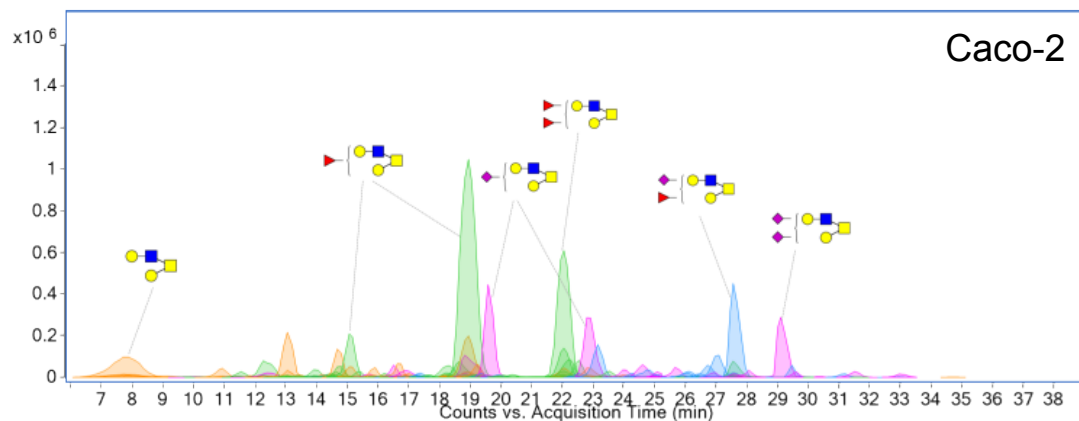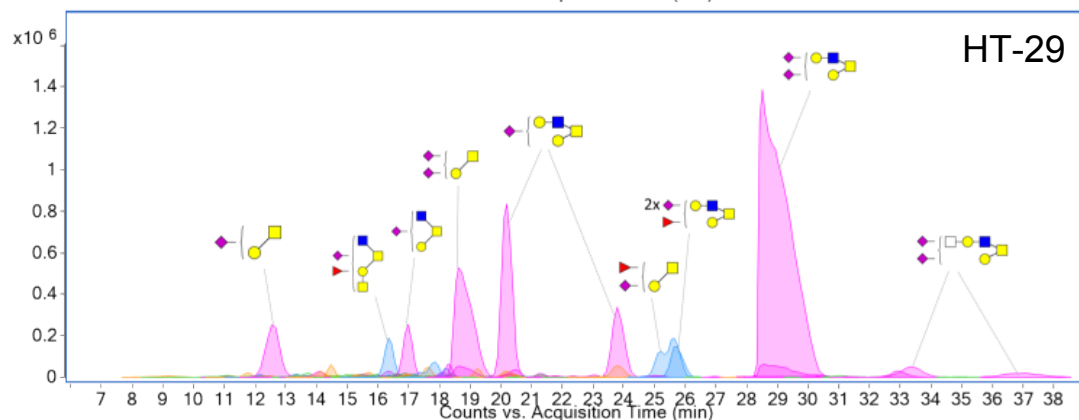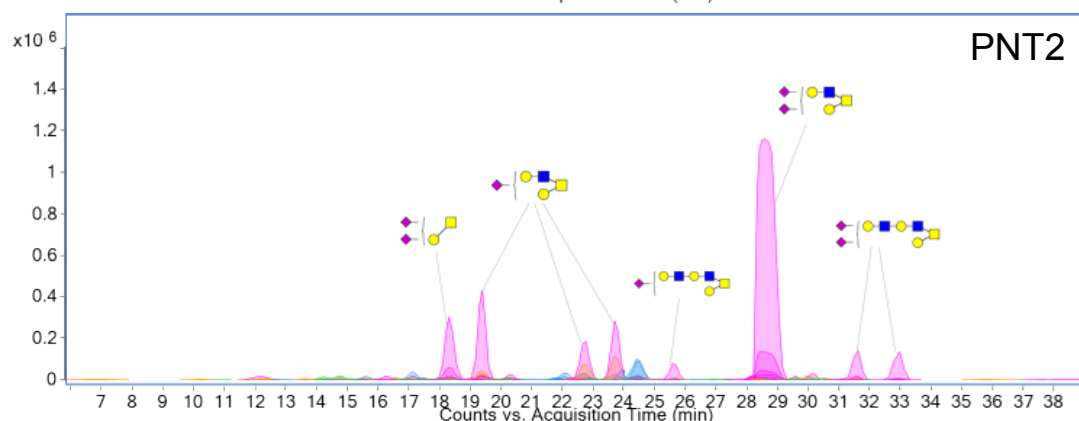

■ High Mannose  
 ■ Neutral  
 ■ Fucosylated  
 ■ Sialylated  
 ■ Fucosylated & Sialylated

**Figure S7.** Comprehensive O-glycan profile of Caco-2, HT-29, and PNT2 membrane-associated proteins.



### SiaNAz-glycopeptide

Q12864ICAD17, N-587

VGNATAK +

5Hex 5HexNAc 1Fuc 1SiaNAz

RT = 25.52 min

Precursor = 2992.217 Da

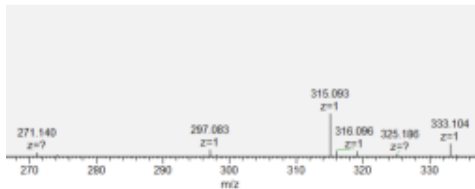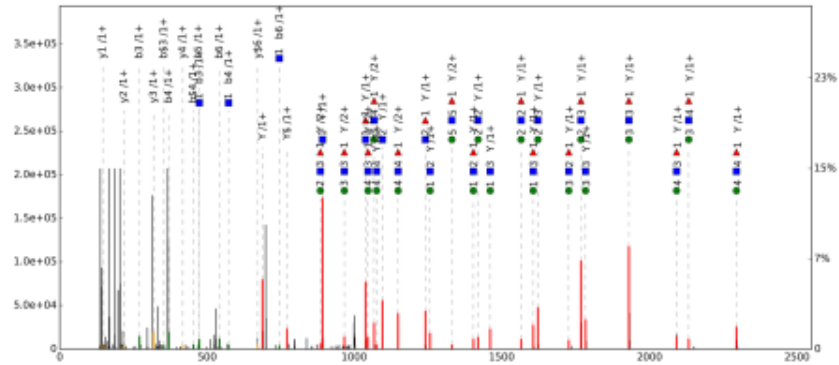

### Sia-glycopeptide

Q12864ICAD17, N-587

VGNATAK +

5Hex 5HexNAc 1Fuc 1NeuAc

RT = 23.20 min

Precursor = 2951.216 Da

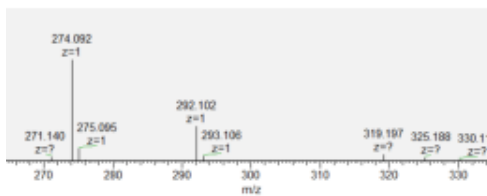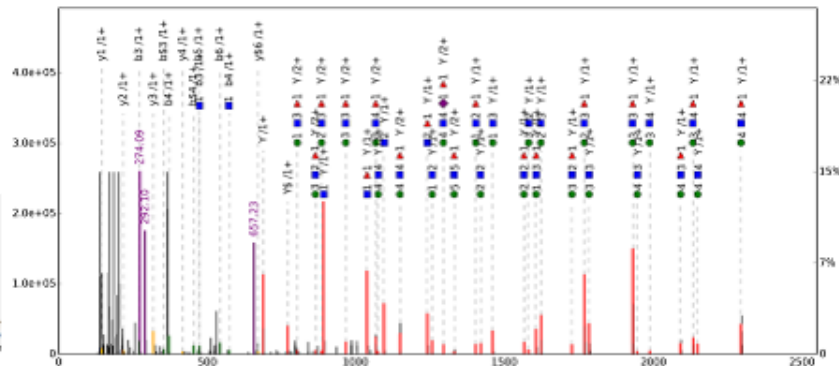

$$\% \text{ SiaNAz incorporation} = \frac{\sum \text{ Ion counts (SiaNAz-GP)}}{\sum \text{ Ion counts (SiaNAz-GP + Sia-GP)}}$$

**Figure S8.** Differentiation and quantification of sialylated (Sia/SiaNAz) glycopeptides. Fragmentation pattern of a Cadherin -17 glycopeptide (VGNATAK, position 585 to 591) on Caco-2 bearing a SiaNAzylated N-glycan (top panel) versus the same glycopeptide bearing the Sia-N-glycan (bottom panel). Spectra were annotated using pGlyco. Glycopeptide signals are outlined in red. Peptide b- and y-ions are outlined in green and orange, respectively. Glycan signals are outlined in purple. SiaNAz (*m/z* 315.093 and 333.104) and Sia (*m/z* 274.092 and 292.102) were distinguished by exact mass (left panels). The sum of the ion counts of the SiaNAzylated glycopeptide was compared to that of the sialylated glycopeptide for quantification.

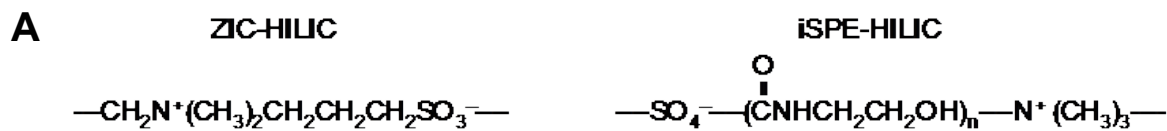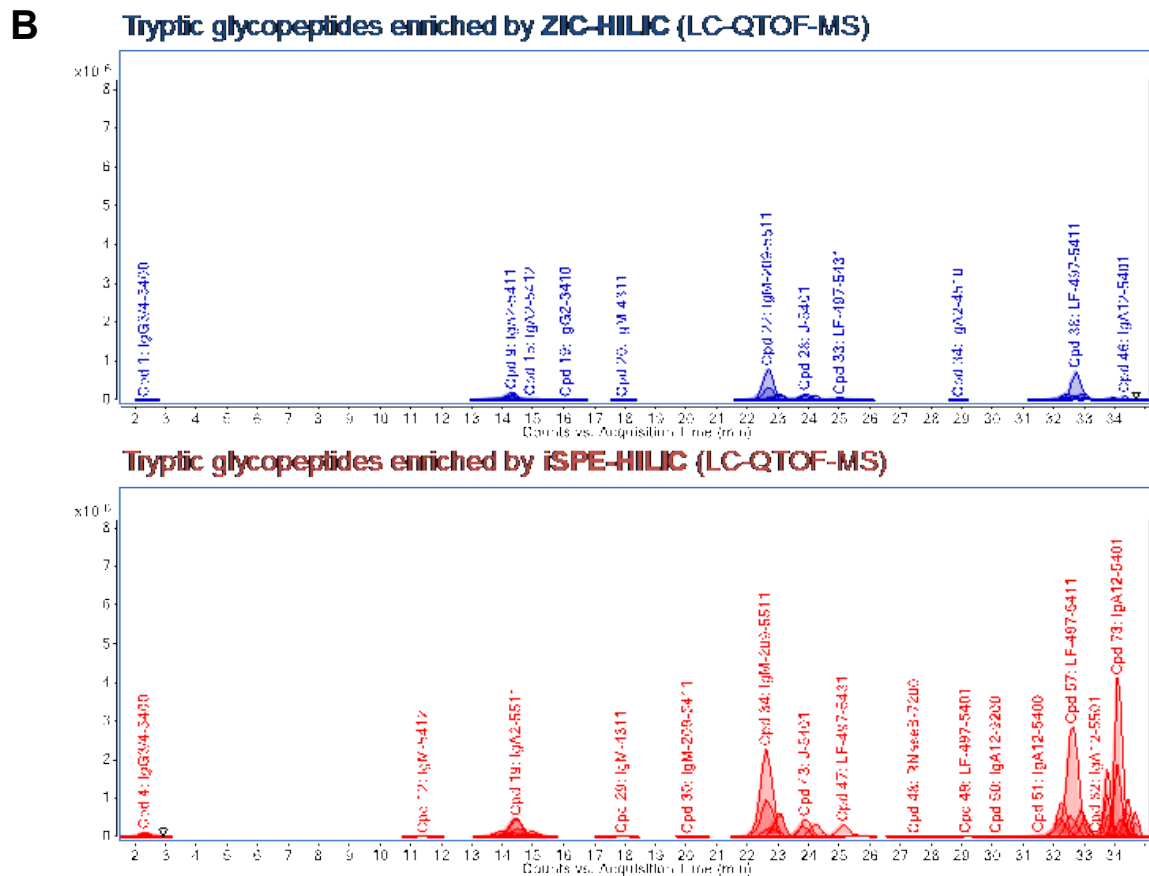

**Figure S9.** Glycopeptide enrichment strategy. (A) Comparison of conventional ZIC-HILIC and newly modified iSPE-HILIC. (B) Abundances and identities of glycopeptides prepared by trypsin digestion of a pool of known glycoprotein standards: Immunoglobulins (IgG, IgA, IgM, and J chain), lactoferrin (LF), and RNase B. Glycopeptides were enriched either with ZIC-HILIC (top panel) or iSPE-HILIC (bottom panel) and quantified using LC-QTOF-MS. Each peak represents a unique glycopeptide. Notation is as follows: Compound (Cpd) number: Protein Name-Site of Glycosylation-Glycan Composition (Hex HexNAc Fuc NeuAc).

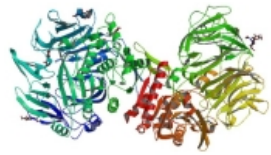

Caco-2 membrane proteins

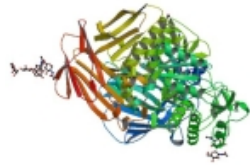

denature  
reduce disulfide bonds  
trypsin digestion

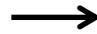

iSPE-HILIC  
LC-MS/MS

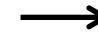

Non-glycosylated  
PAEAPMPAEPAPPGPASPGGAPEPPAAAR  
DSQVPGPIGCNCDPQGSVSSQCDAAGQCQCK  
PAEAPMPAEPAPPGPASPGGAPEPPAAAR

...

Glycosylated

IPNNTQWVTWSPVGHK  
VFPYISVMVNNGLSLYDHSK  
CVYEALCNTTSECPPPVITR  
VLSLPLNSSAVVNCVHGLPTPALR  
IVYNITLPLHPNQGIIHR  
GNLTYGYVTILNGSDIR  
HIWSLEISNKPNVSEPEEPK

...

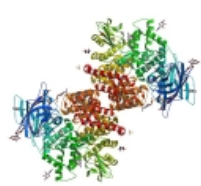

PNT2 membrane proteins

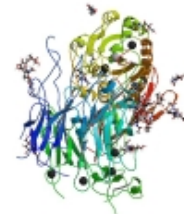

denature  
reduce disulfide bonds  
trypsin digestion

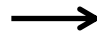

iSPE-HILIC  
LC-MS/MS

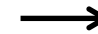

Non-glycosylated  
VCECNPNYTGSAACDCSLDTSTCEASNGQICNGR  
AYTNSVDVLDGEGWESQDAPSCSTHPCDSSLPCDSDL

...

Glycosylated

ILTNNSTPILSPQEVVSCSQYAQGCEGGFPYLIAGK  
AFSNSSYVLNPTTGELVFDPLSASDTGEYSCEAR  
LSHDANETLPLHLYVK  
HFKNCTSIGDLHILPVAFR  
HRPTAGAFNHSDLDAELR  
SLDAYPILNQAQALENHTEVQFQK

...

### # Unique Peptides

|        | Total  | Glycopeptide | Enrichment |
|--------|--------|--------------|------------|
| Caco-2 | 317587 | 307391       | 96.8%      |
| PNT2   | 24786  | 26415        | 93.8%      |

**Figure S10.** Percent enrichment of glycopeptides over non-glycosylated peptides in Caco-2 and PNT2. Enriched membrane proteins were denatured and digested with trypsin in solution. Resulting peptides were enriched with iSPE-HILIC and sequenced using C18-MS/MS. The goodness of enrichment was calculated based on the number of unique peptides identified.

Protein: Cadherin-17

Glycan structure:

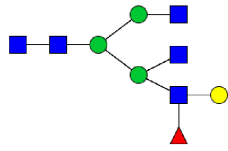

N-Glycosylation site 250

Peptide sequence:

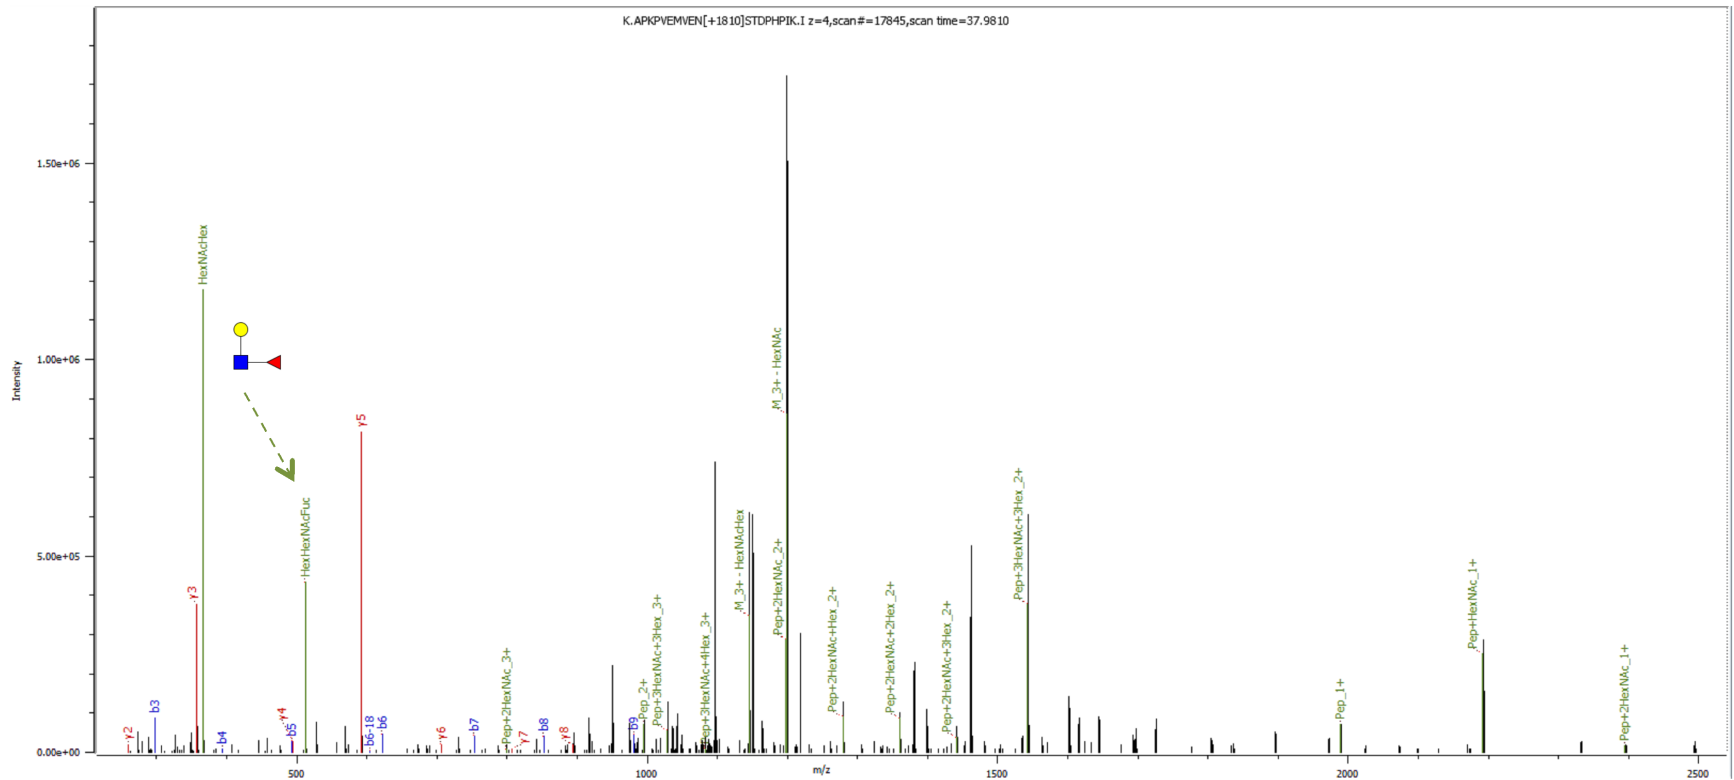

**Figure S11.** Informative glycopeptide fragmentation with stepped collision energy. Glycan ions (green) yield information about branching and the presence or absence of epitopes. Glycopeptide ions (green) facilitate localization of the glycosylation site. Peptide b-ions (blue) and y-ions (red) were used to sequence the peptide and search against the human proteome. Peptide sequence shows the site of glycosylation in bold and the b-/y-ions generated from the fragmentation event. Spectral searches were performed on Byonic (Protein Metrics, CA).

Charge state 3 precursor

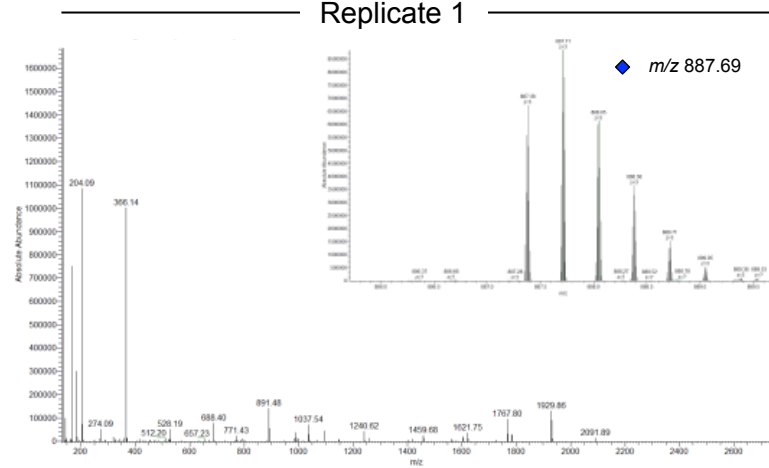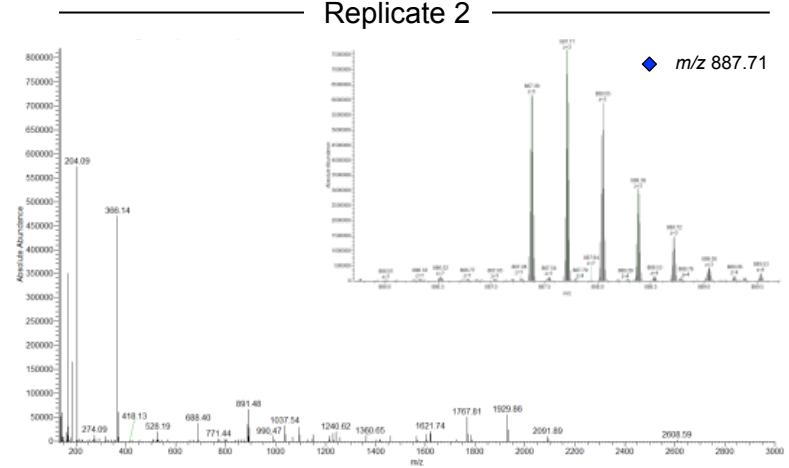

Charge state 4 precursor

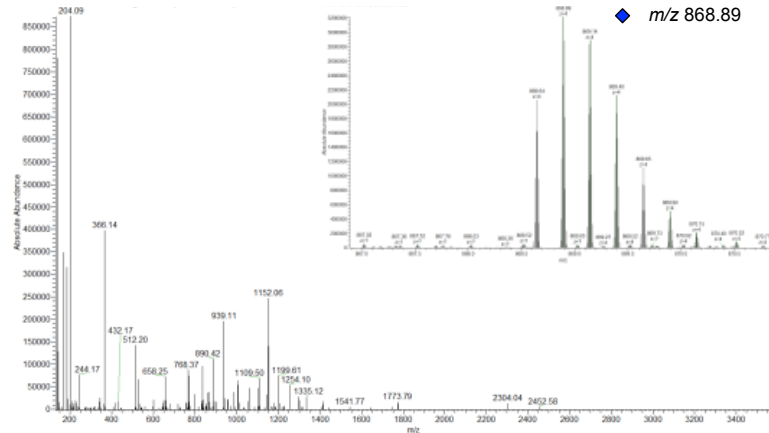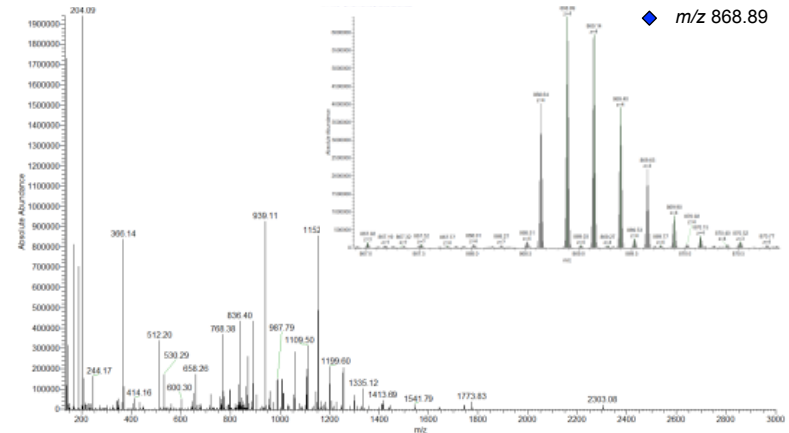

Monoisotopic vs. abundant precursor

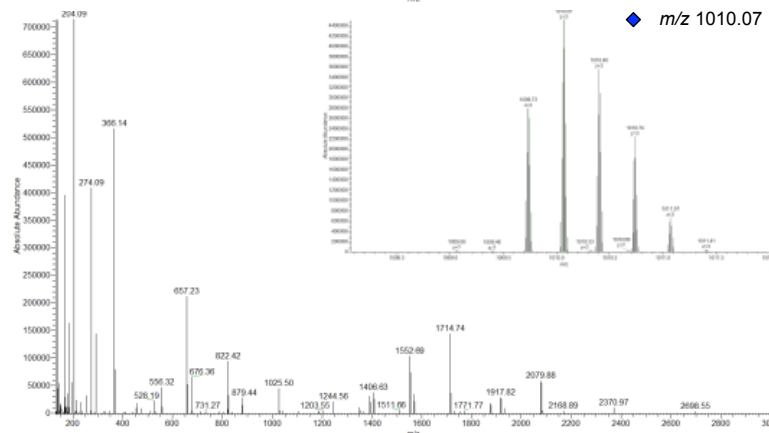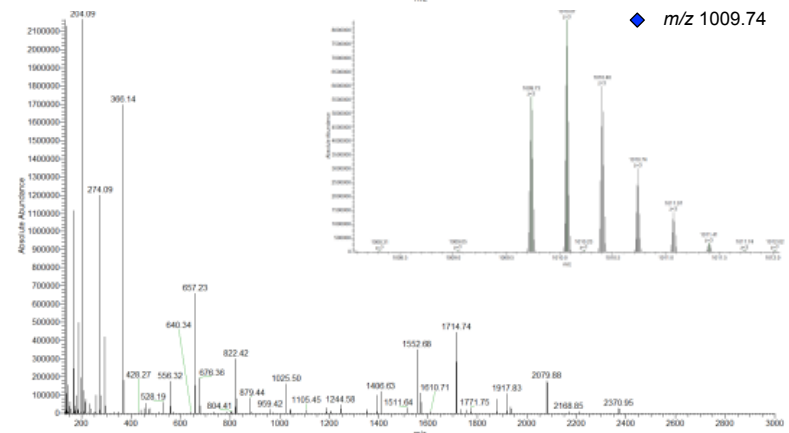

**Figure S12.** MS/MS spectra of representative glycopeptides from independent biological replicates. MS spectra are shown inset. Precursor ions are indicated by a blue diamond.

**A**

Caco-2

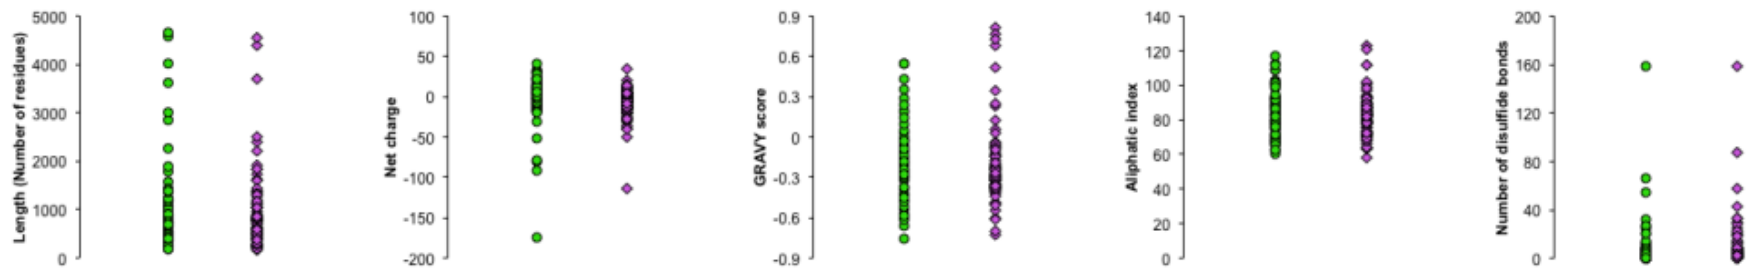

PNT2

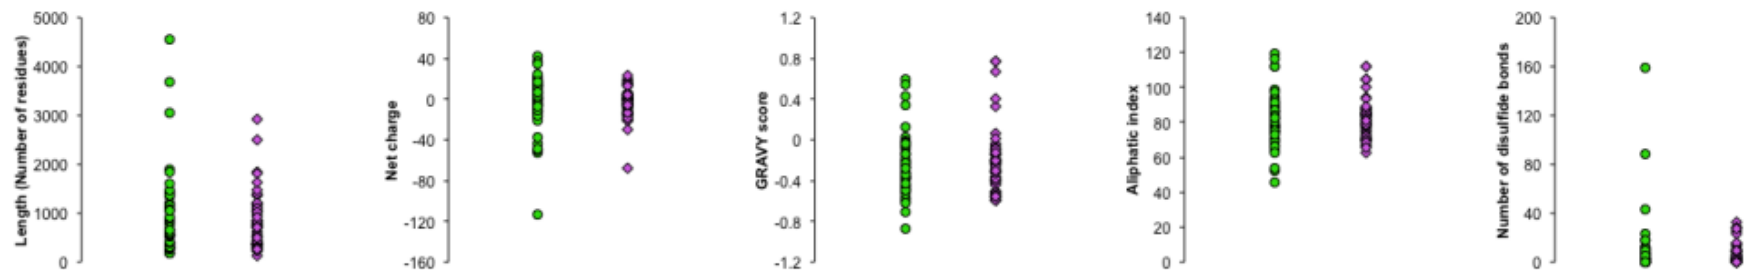

● Non-sialylated    ◆ Sialylated

**B**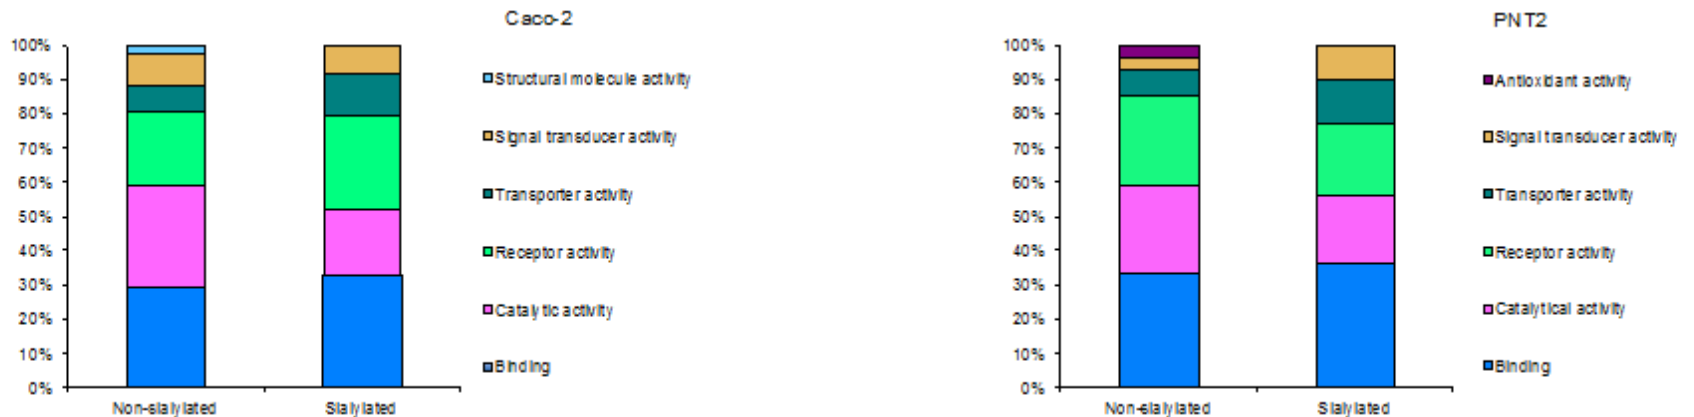

**Figure S13.** Classification of cell surface glycoproteins differentiated by the occurrence of sialylation. (A) Comparison of full-length sequence features between non-sialylated and sialylated cell surface glycoproteins identified on Caco-2 and PNT2. (B) Molecular functions of non-sialylated and sialylated Caco-2 and PNT2 cell surface glycoproteins.

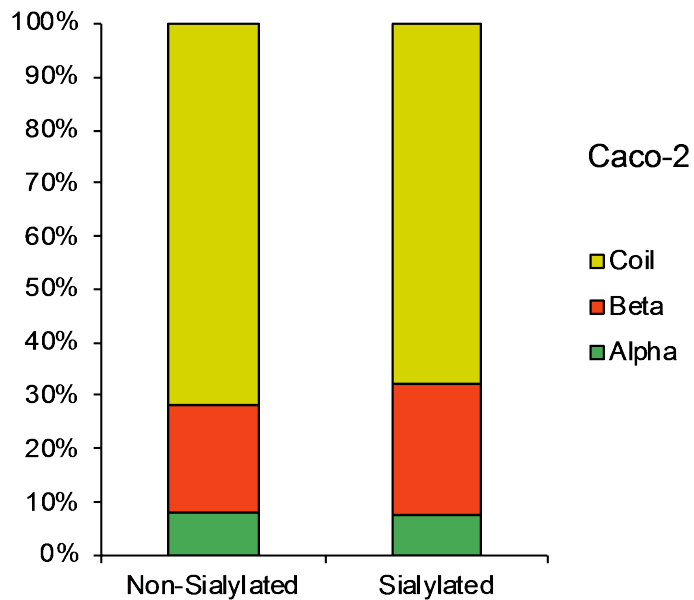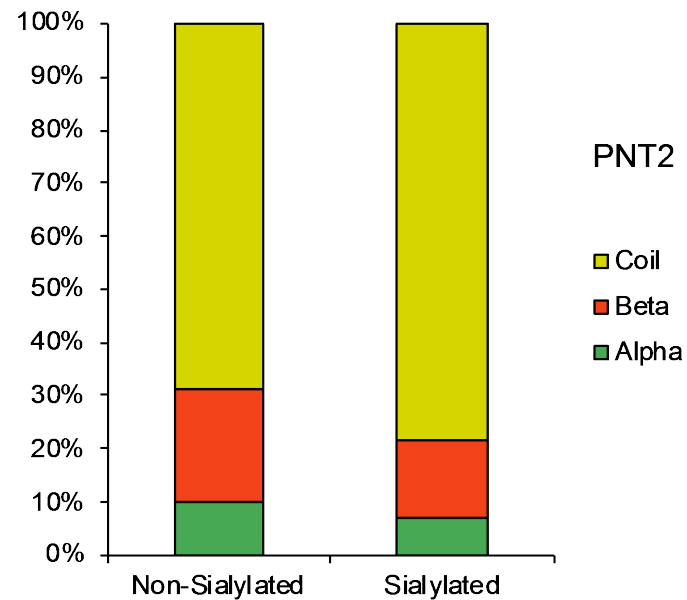

**Figure S14.** Secondary structure prediction of glycosylation sites that were identified as either non-sialylated or sialylated on the surface of Caco-2 and PNT2 cells.

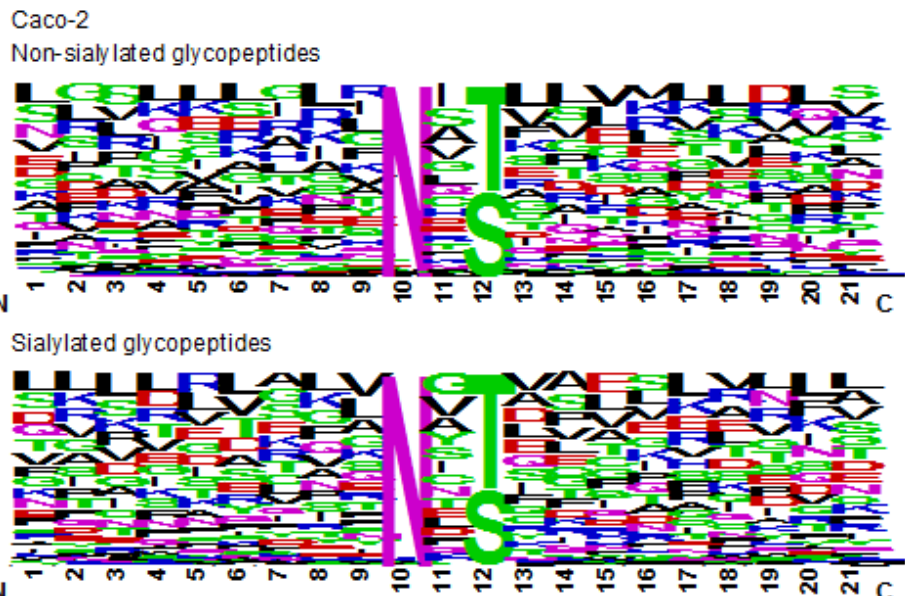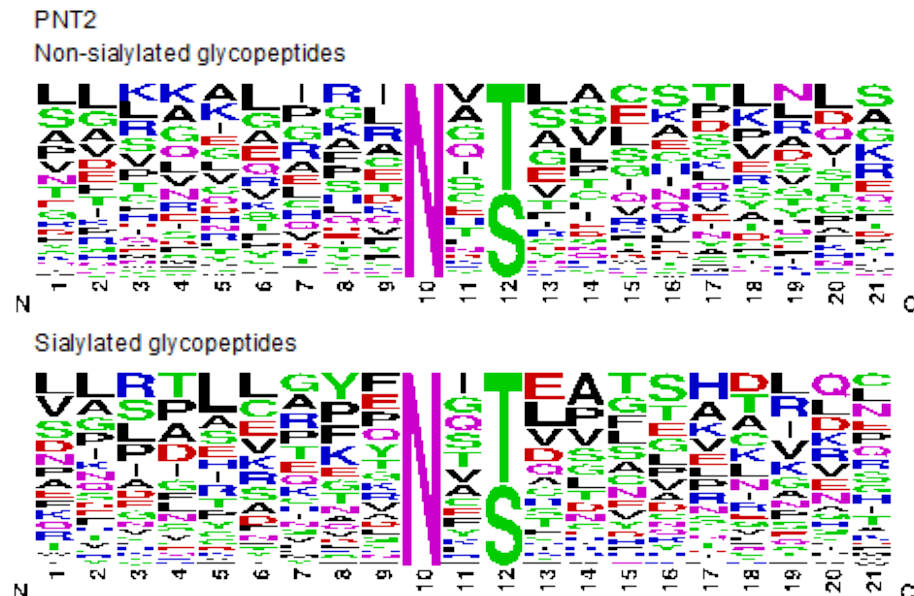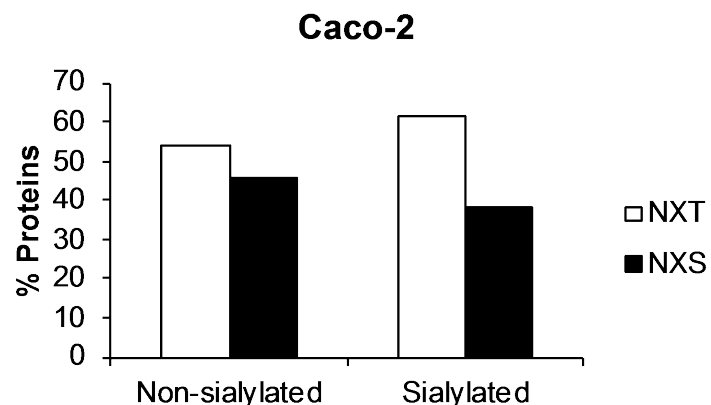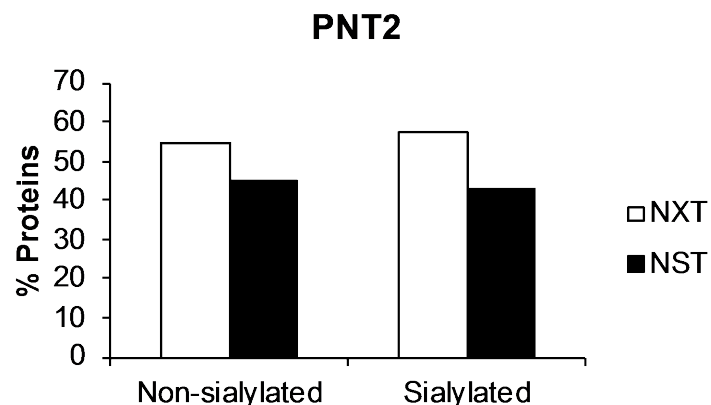

**Figure S15.** Frequency plots of amino acid residues  $\pm 9$  positions from the conserved N-glycosylation consensus sequence, N-X-S/T. Residues are indicated as one letter symbols while frequency is proportional to the size of the letter. The plot is colored according to the charge of the amino acid: KRH, green; DE, blue; AVLIPWFM, red. Caco-2 (left) and PNT2 (right) cell surface glycopeptides are distinguished by the occurrence of sialylation on glycans attached to the Asn residue of the consensus sequence. Logos were generated using WebLogo version 2.8.2. Bar graphs show percent of non-sialylated and sialylated peptides that were glycosylated at NXT or NXS sequences, respectively.



# Receptor

A

P00533 | Epidermal growth factor receptor

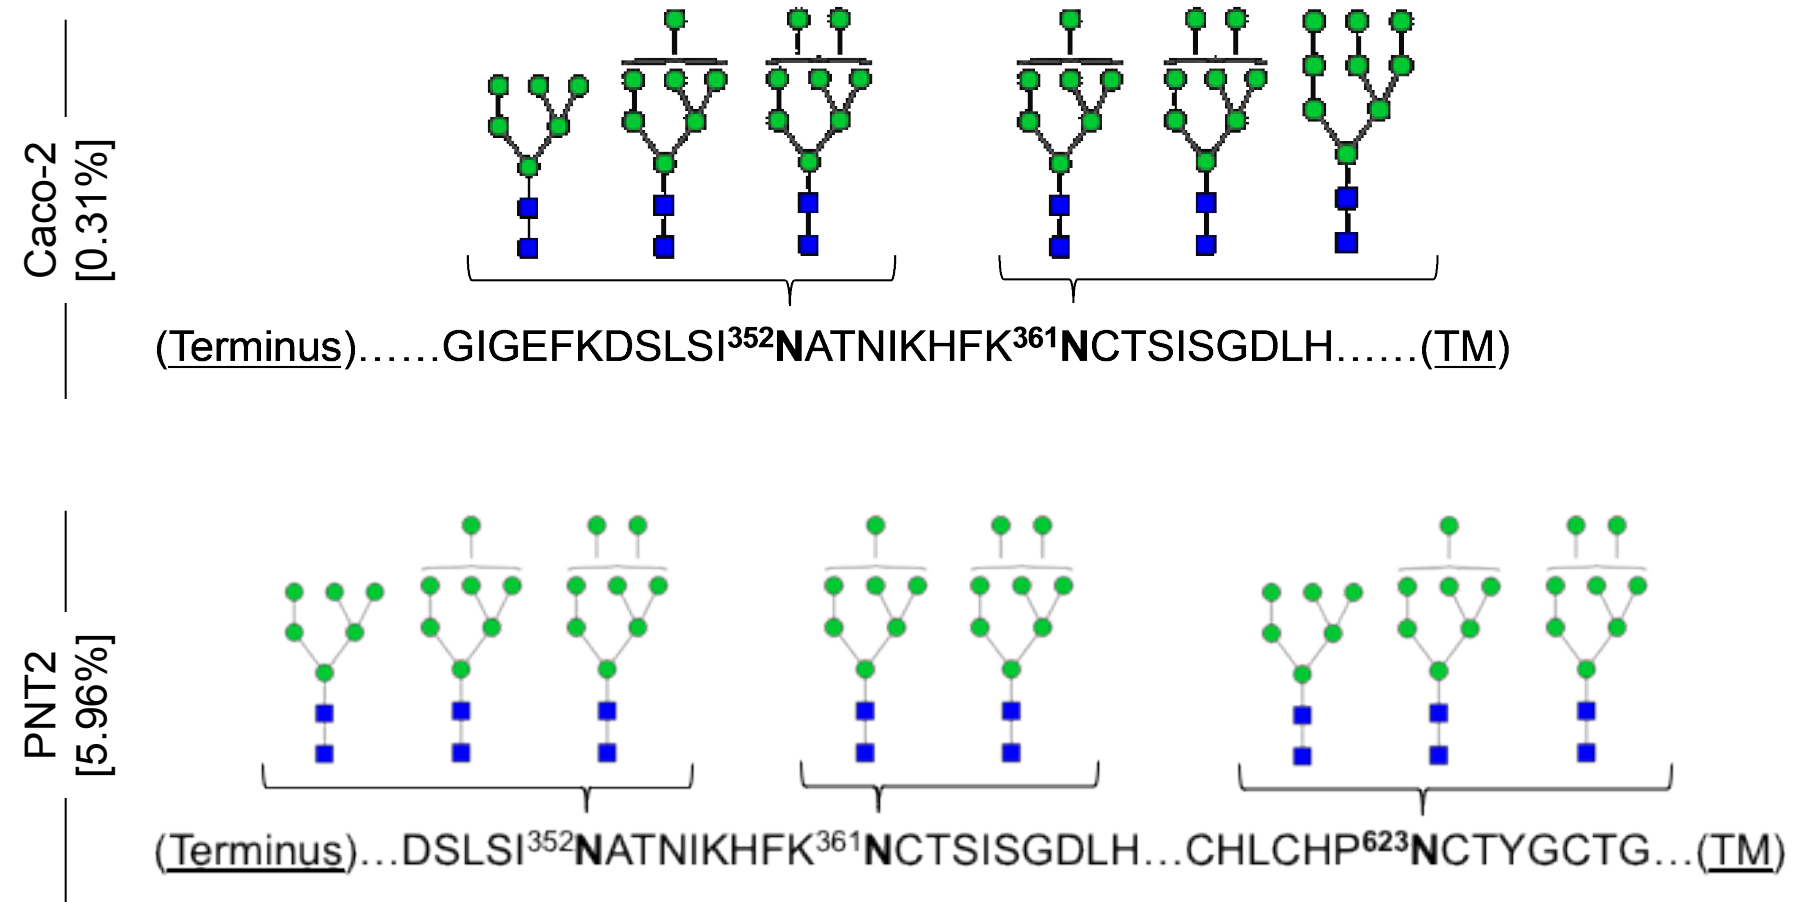

**Figure S16.** (A-K) Graphical representations of glycoforms associated with each occupied site on representative membrane proteins of Caco-2 and PNT2. Proteins are presented according to molecular function (i.e. receptor, hydrolase/peptidase, adhesion/signaling). Glycan structures are putative. Brackets indicate relative abundance, which was determined by normalization to the total membrane glycoprotein abundance per cell line using Byonic. The position and site of glycosylation are bolded within the sequence. The complete list of glycoforms is found in Tables S2-S5. TM, transmembrane.

# Receptor

**B**

P02786 | Transferrin receptor protein 1

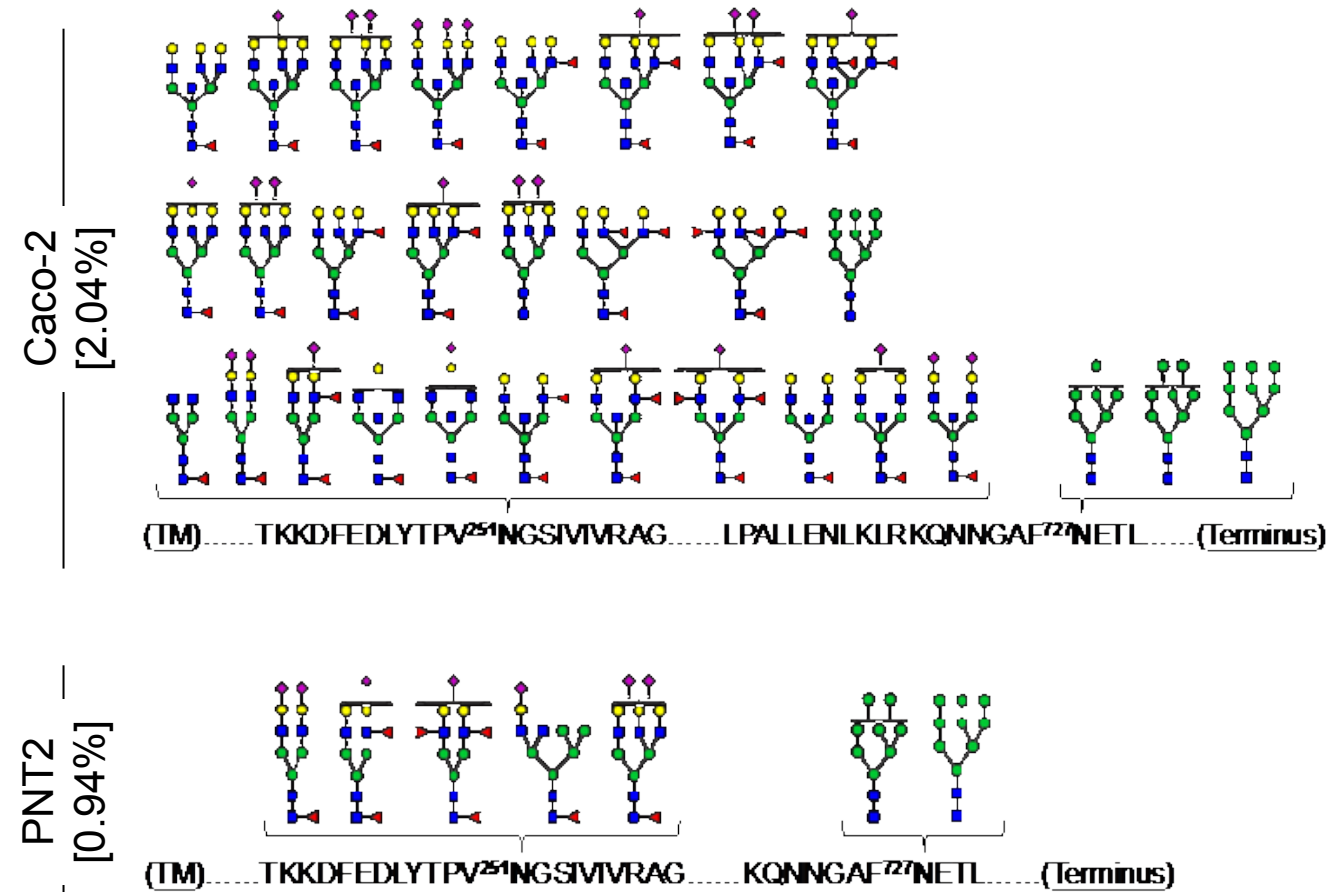

# Receptor

C

O15031 | Plexin-B2

Caco-2  
[2.31%]

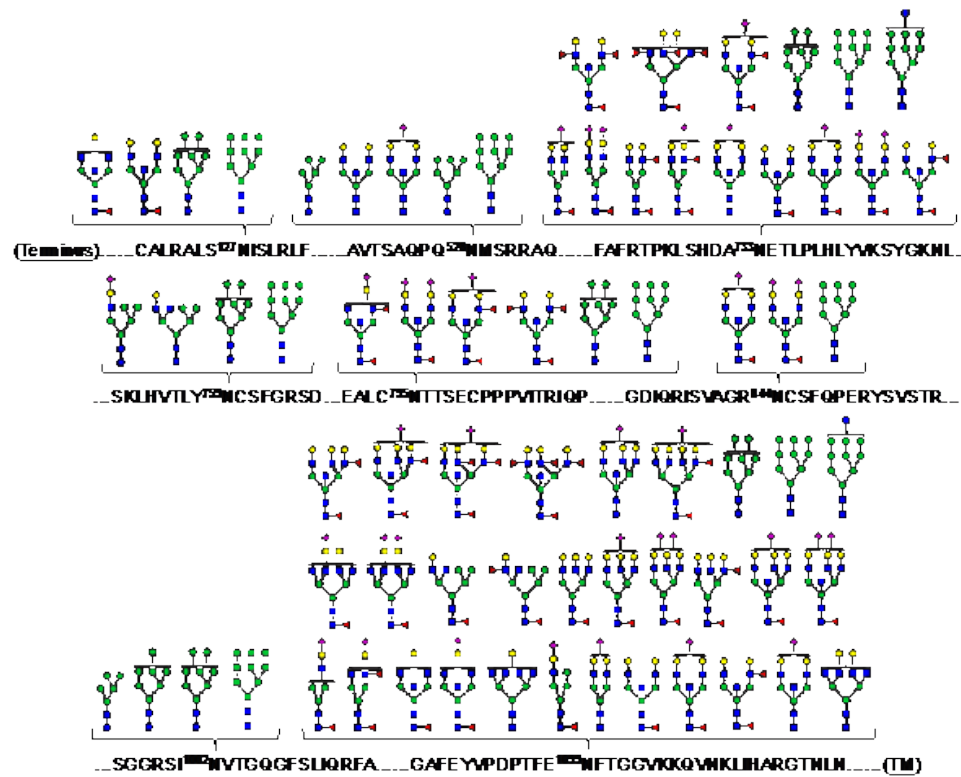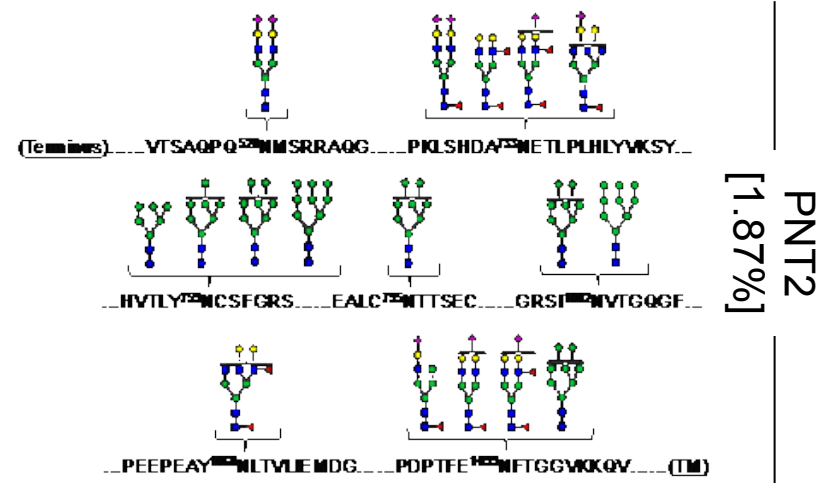

PNT2  
[1.87%]

# Hydrolase/Peptidase

D

O14672 | Disintegrin and metalloproteinase domain-containing protein 10

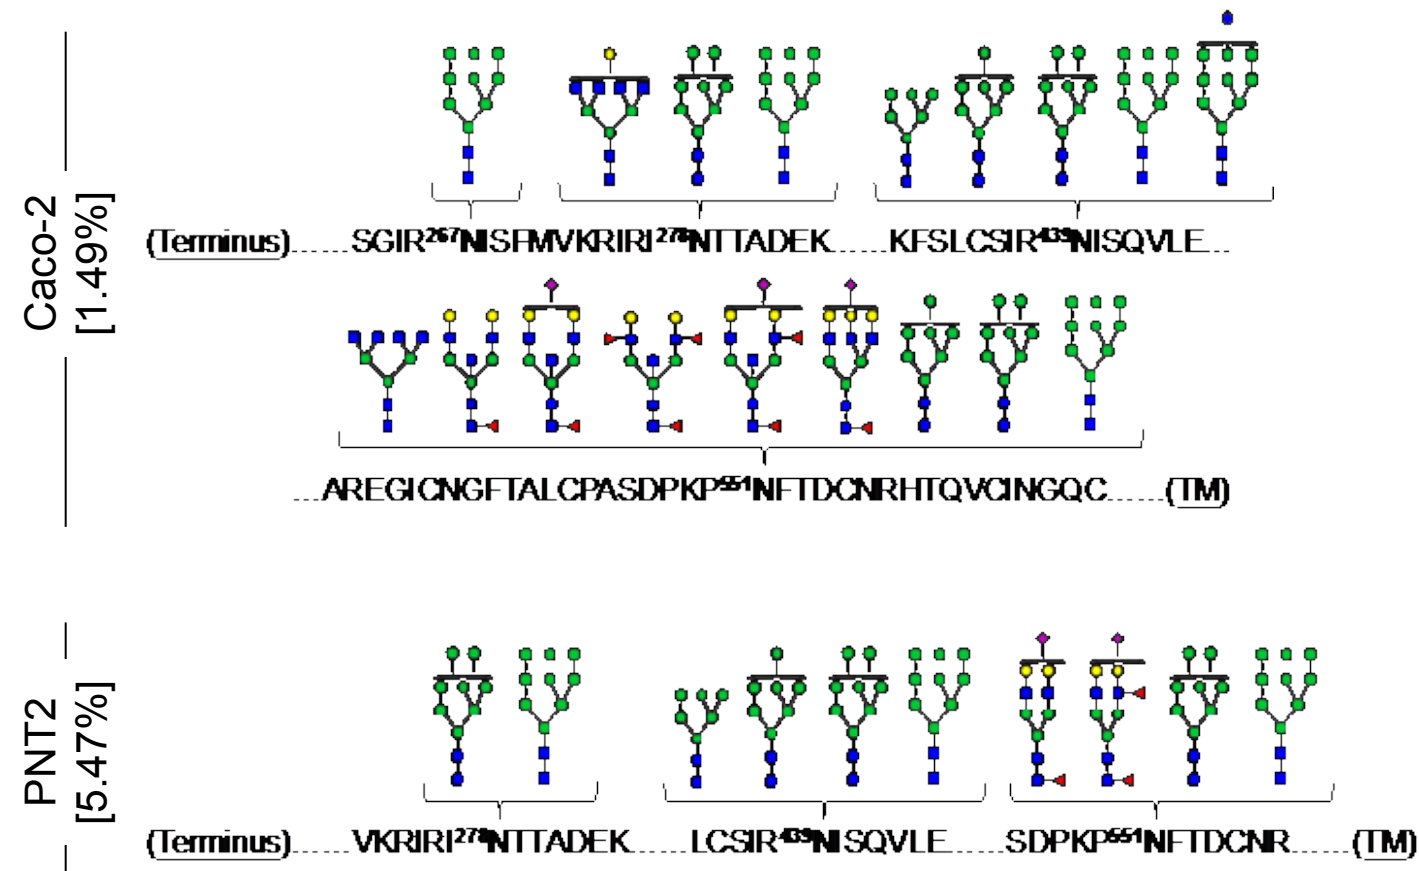

# Hydrolase/Peptidase

E

Q9UIQ6 | Leucyl-cystinyl aminopeptidase

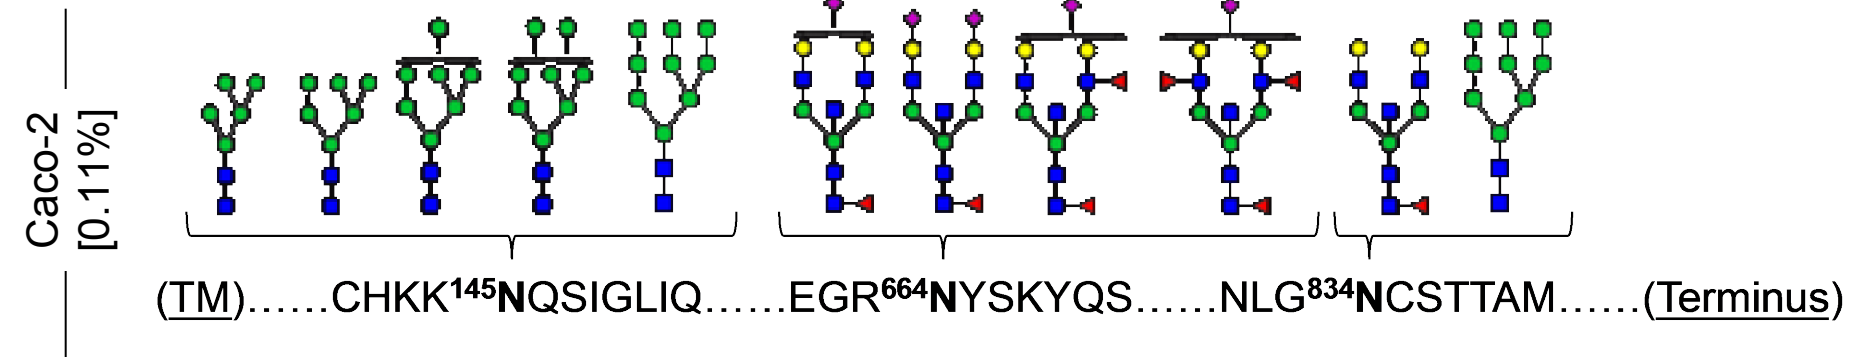

# Hydrolase/Peptidase

F

## P27487 | Dipeptidyl peptidase 4

Caco-2  
[6.18%]

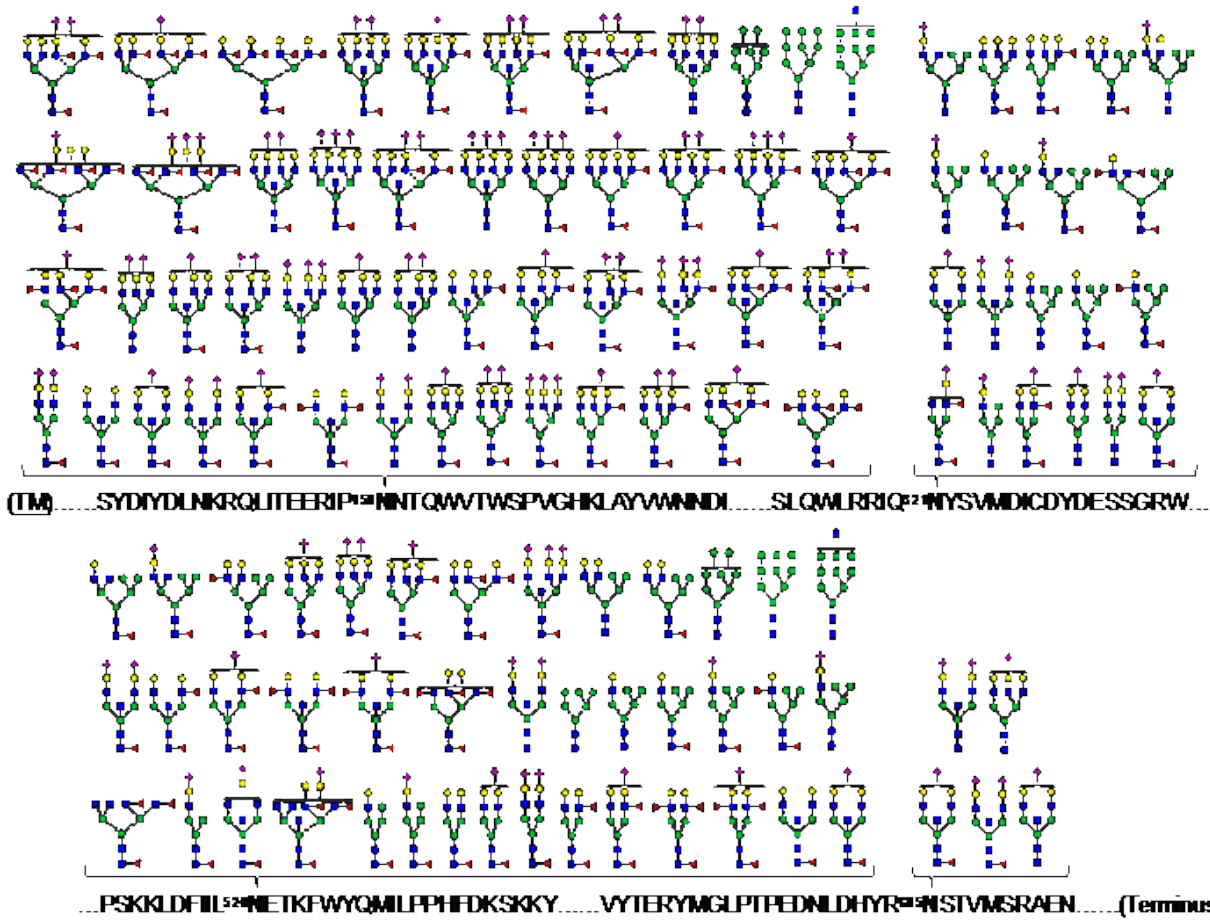

# Hydrolase/Peptidase

**G**

## P15144 | Aminopeptidase N

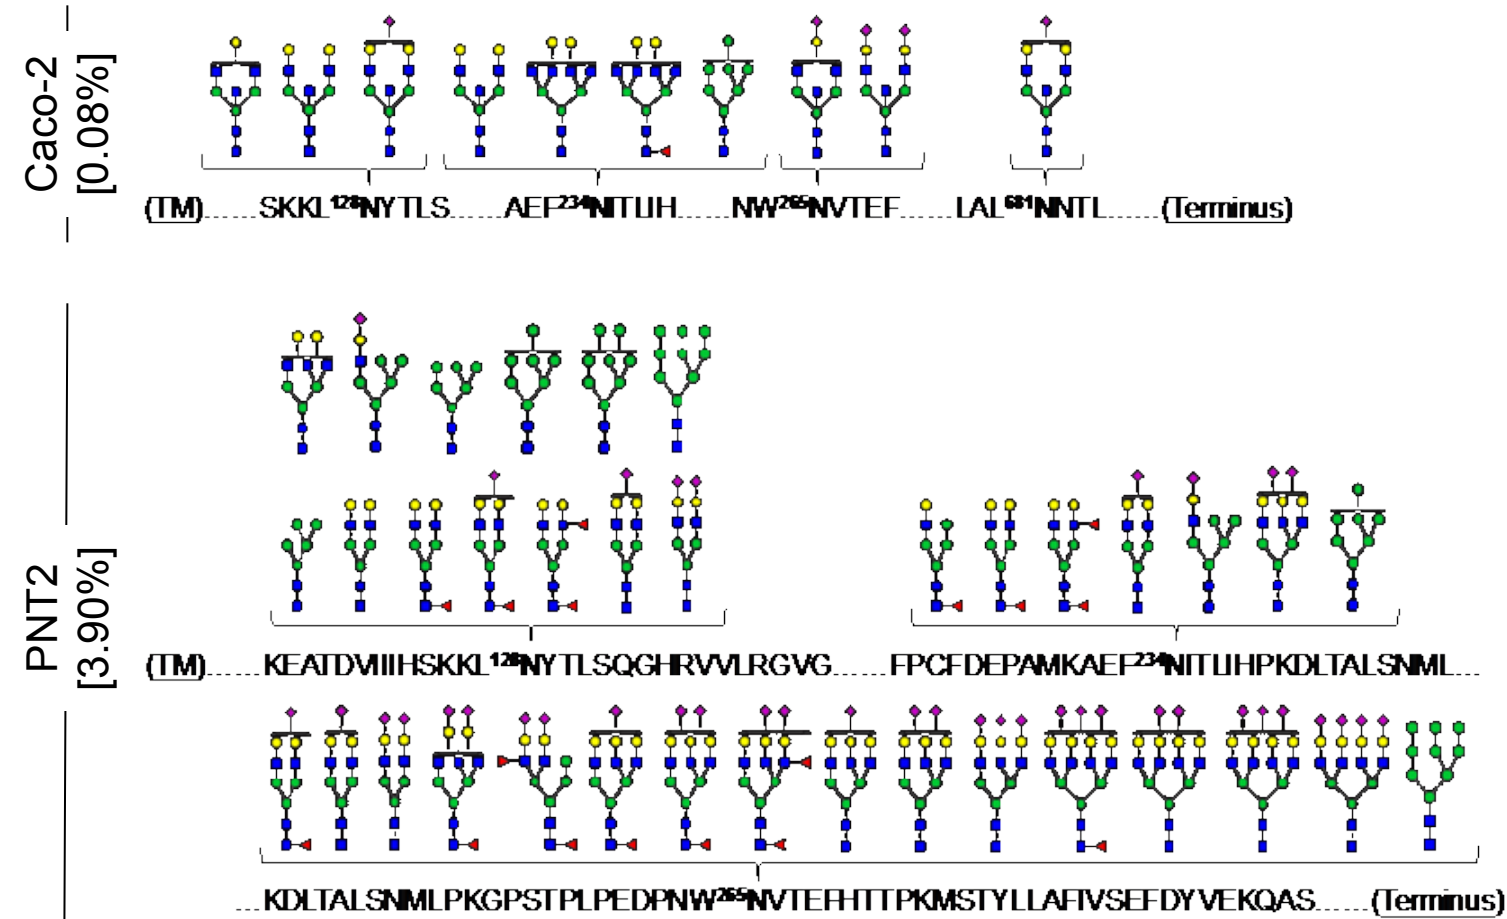

# Hydrolase/Peptidase

## H

P42892 | Endothelin-converting enzyme 1

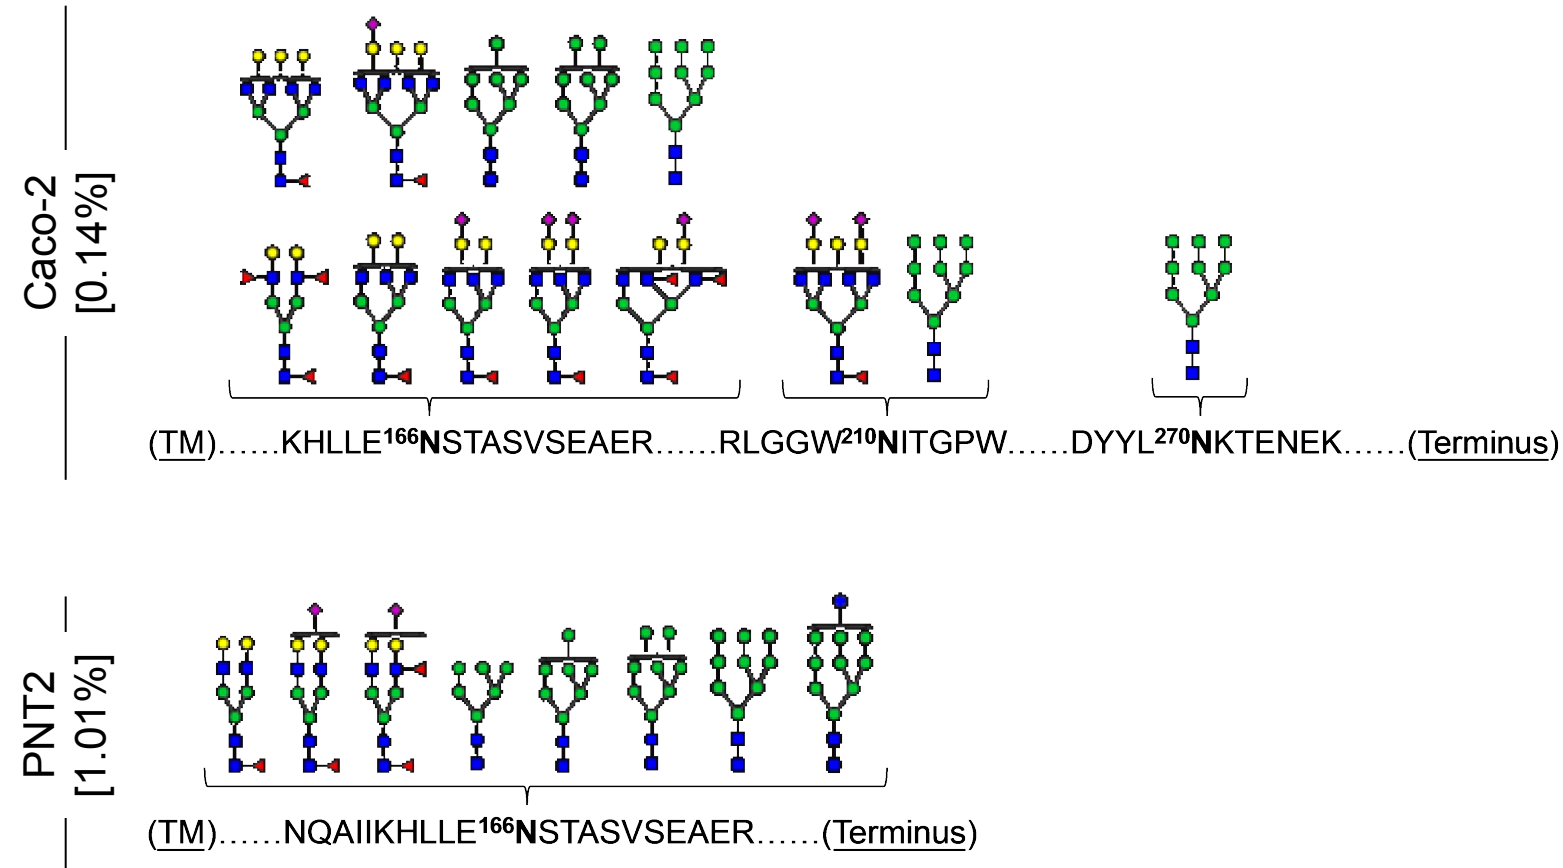



# Adhesion/Signaling

## P05556 | Integrin beta-1

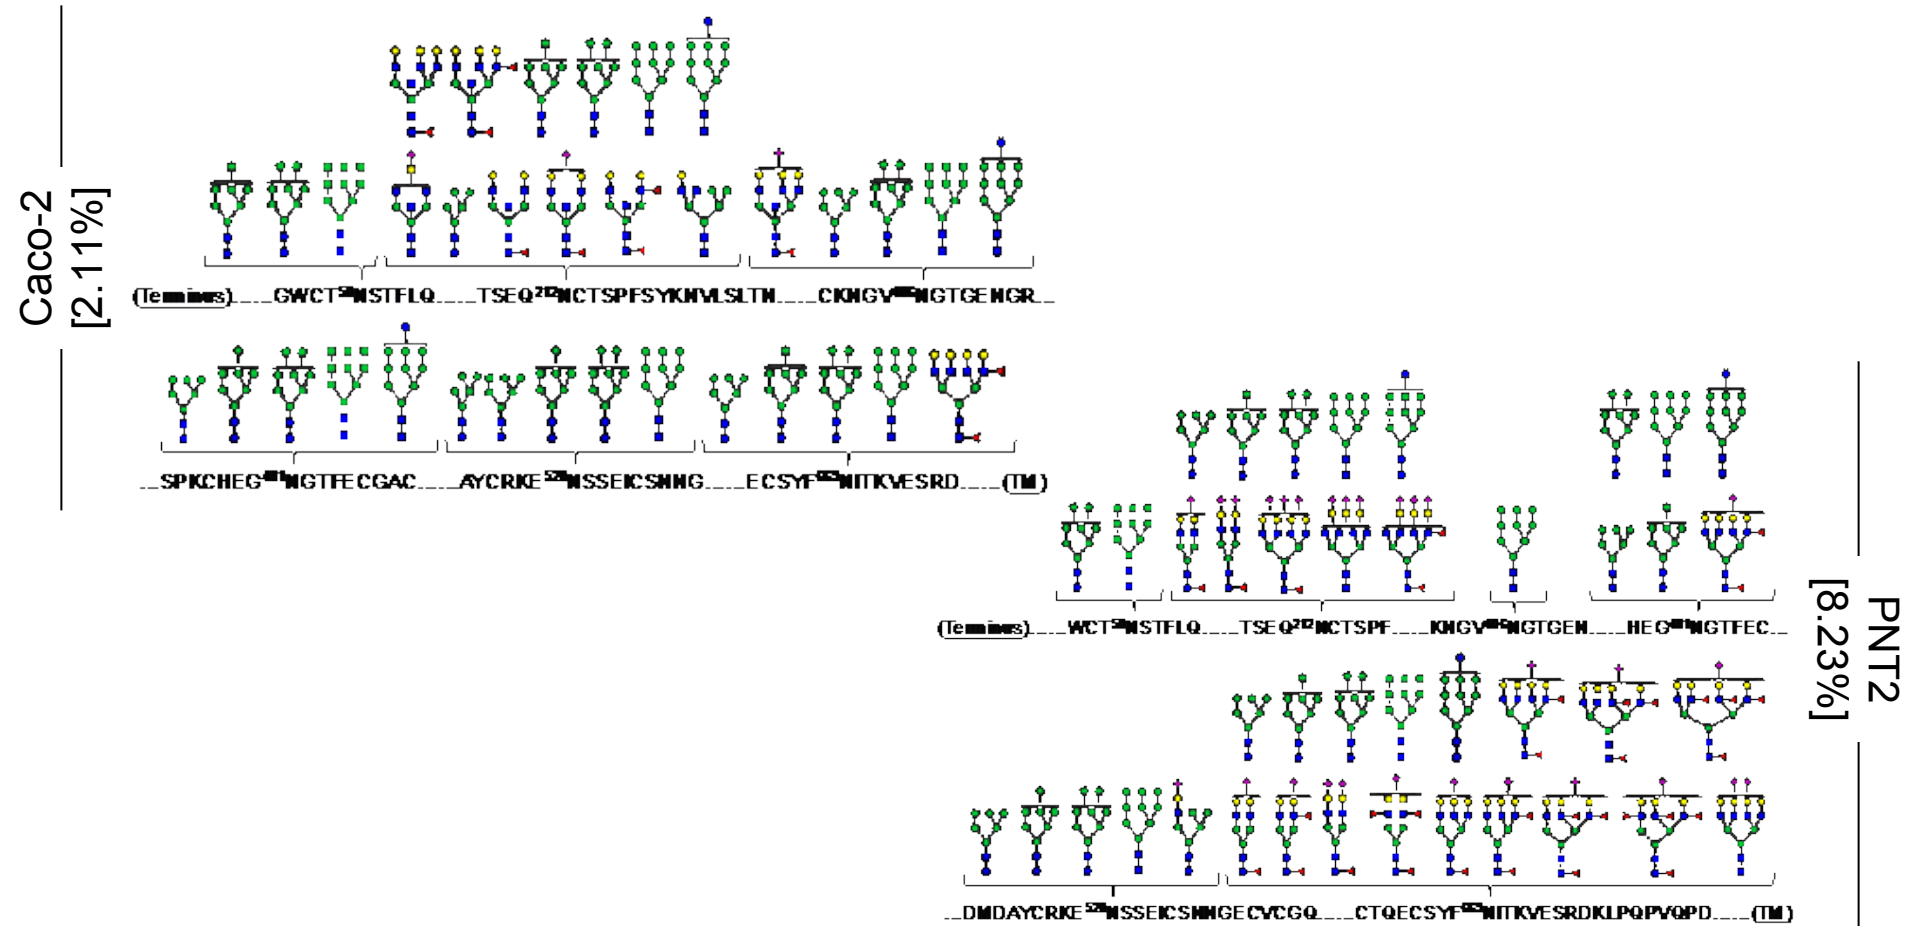

# Adhesion/Signaling

J

P06756 | Integrin alpha-V

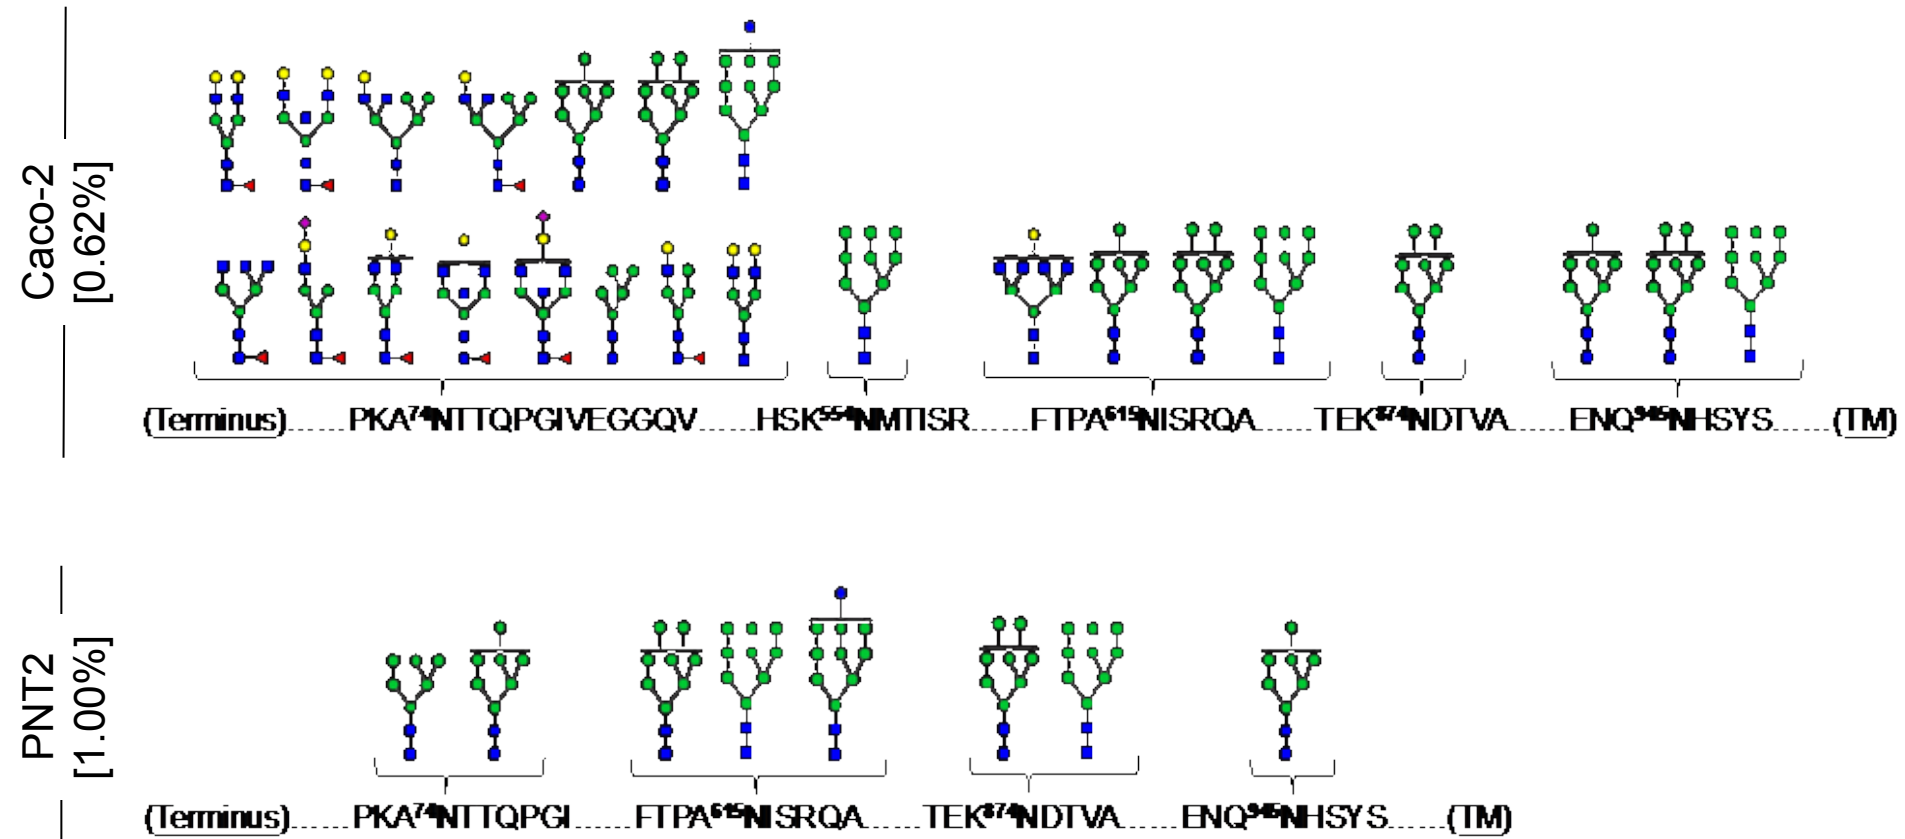

## K

### Q14126 | Desmoglein-2

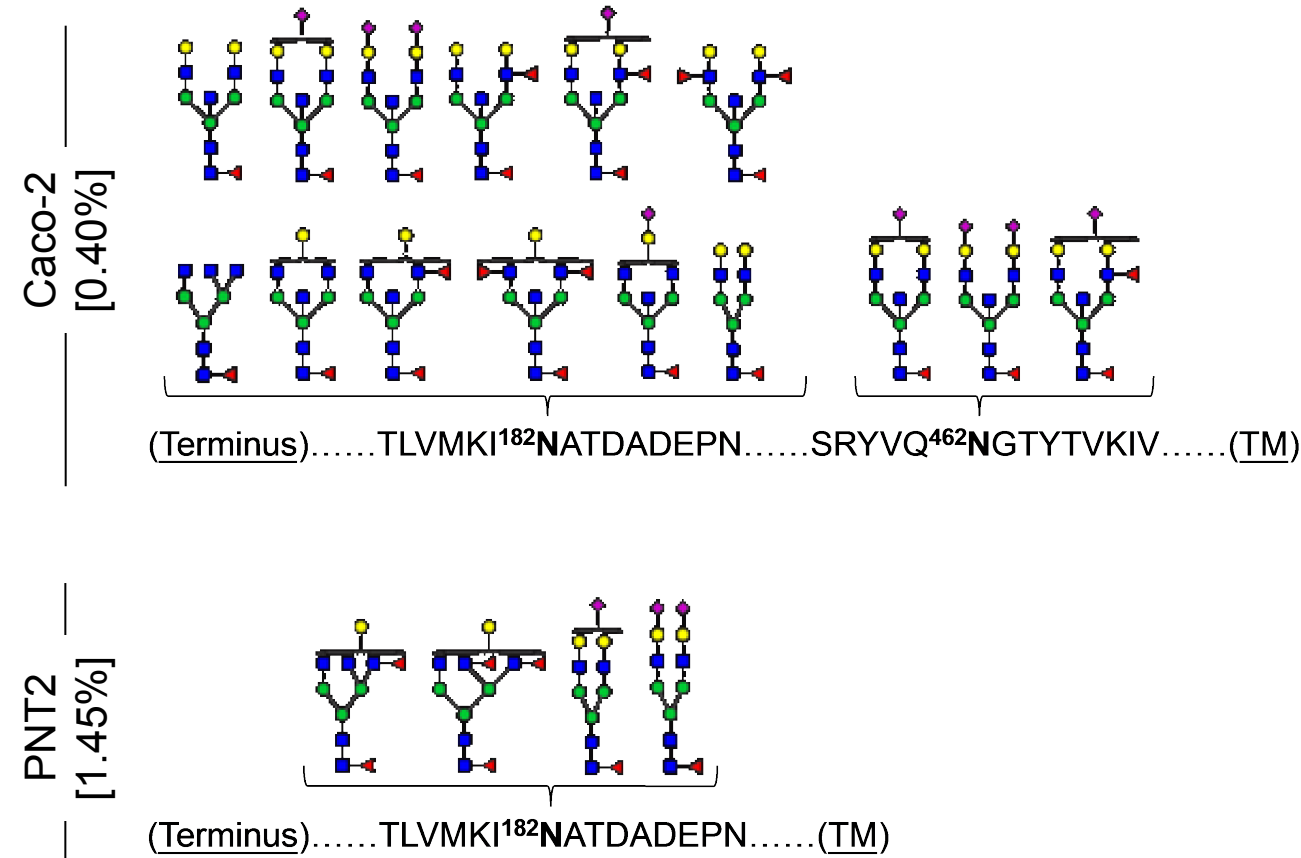

**A****Caco-2: GM1(d34:1)**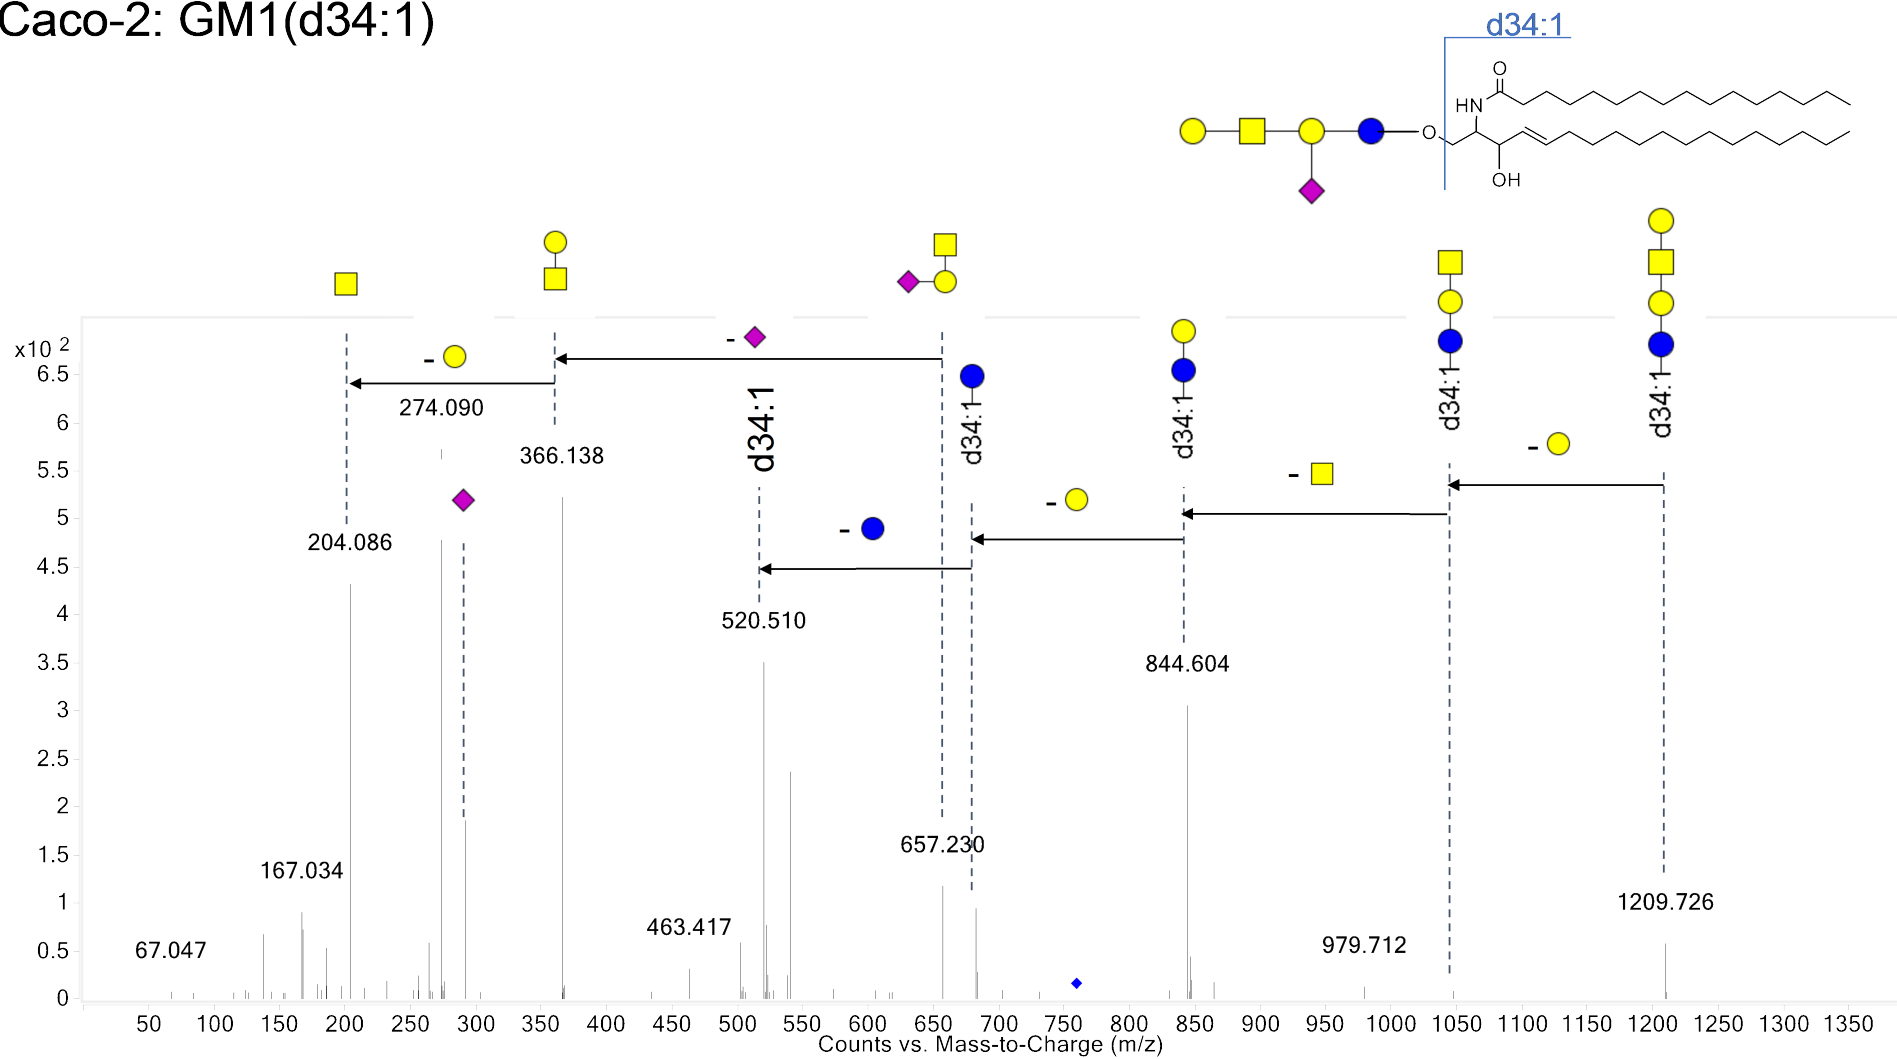

**Figure S17.** (A-D) CID fragmentation spectra of glycosphingolipid (GSL) structures derived from Caco-2. Each spectrum displays a fragmentation event as specified by  $m/z$  and symbolic representation. The precursor ion is indicated by a blue diamond. Sequential losses are annotated inset. Lc, lacto; Fuc, fucosylated.

**B****Caco-2: GM1(t34:1)**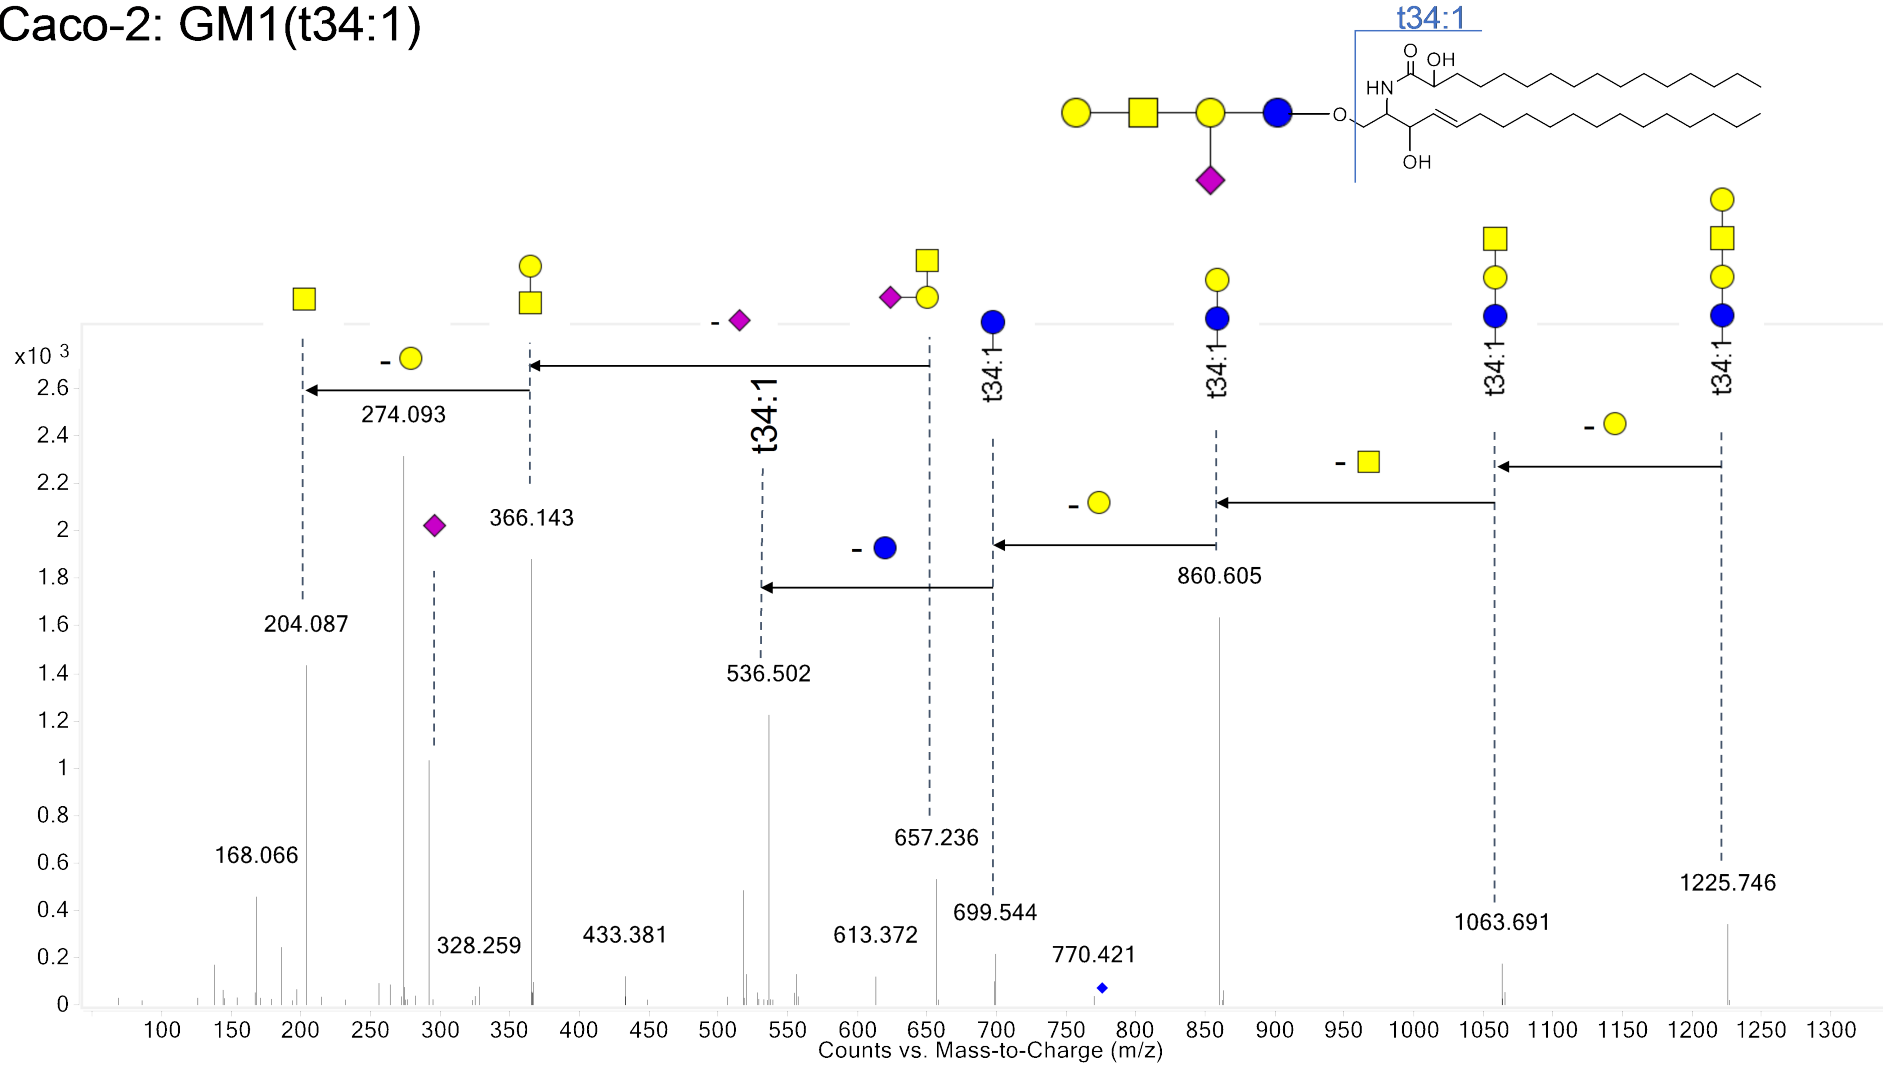



**D****Caco-2: Fuc-Lc4(t34:1)**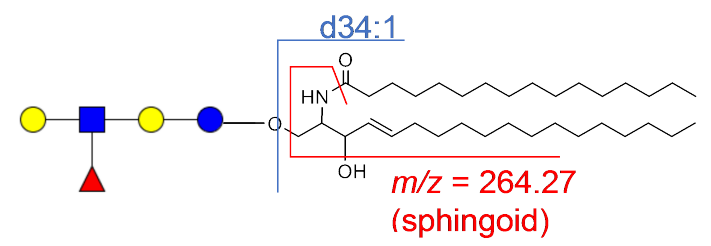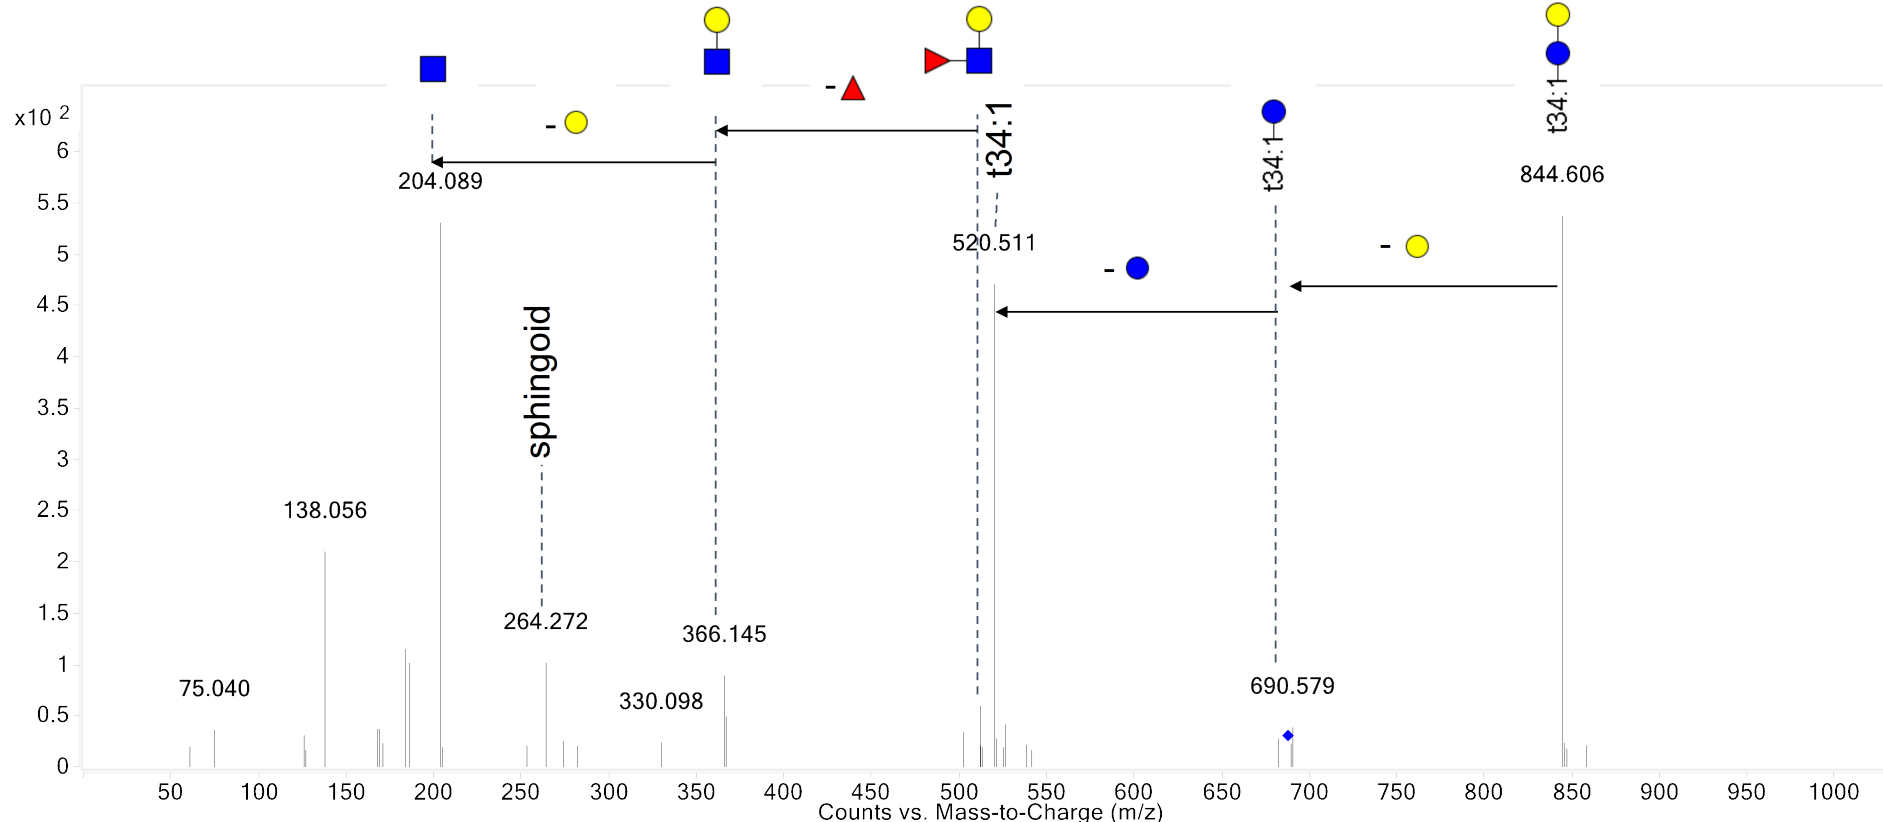

**A****PNT2: Gb3(d34:1)**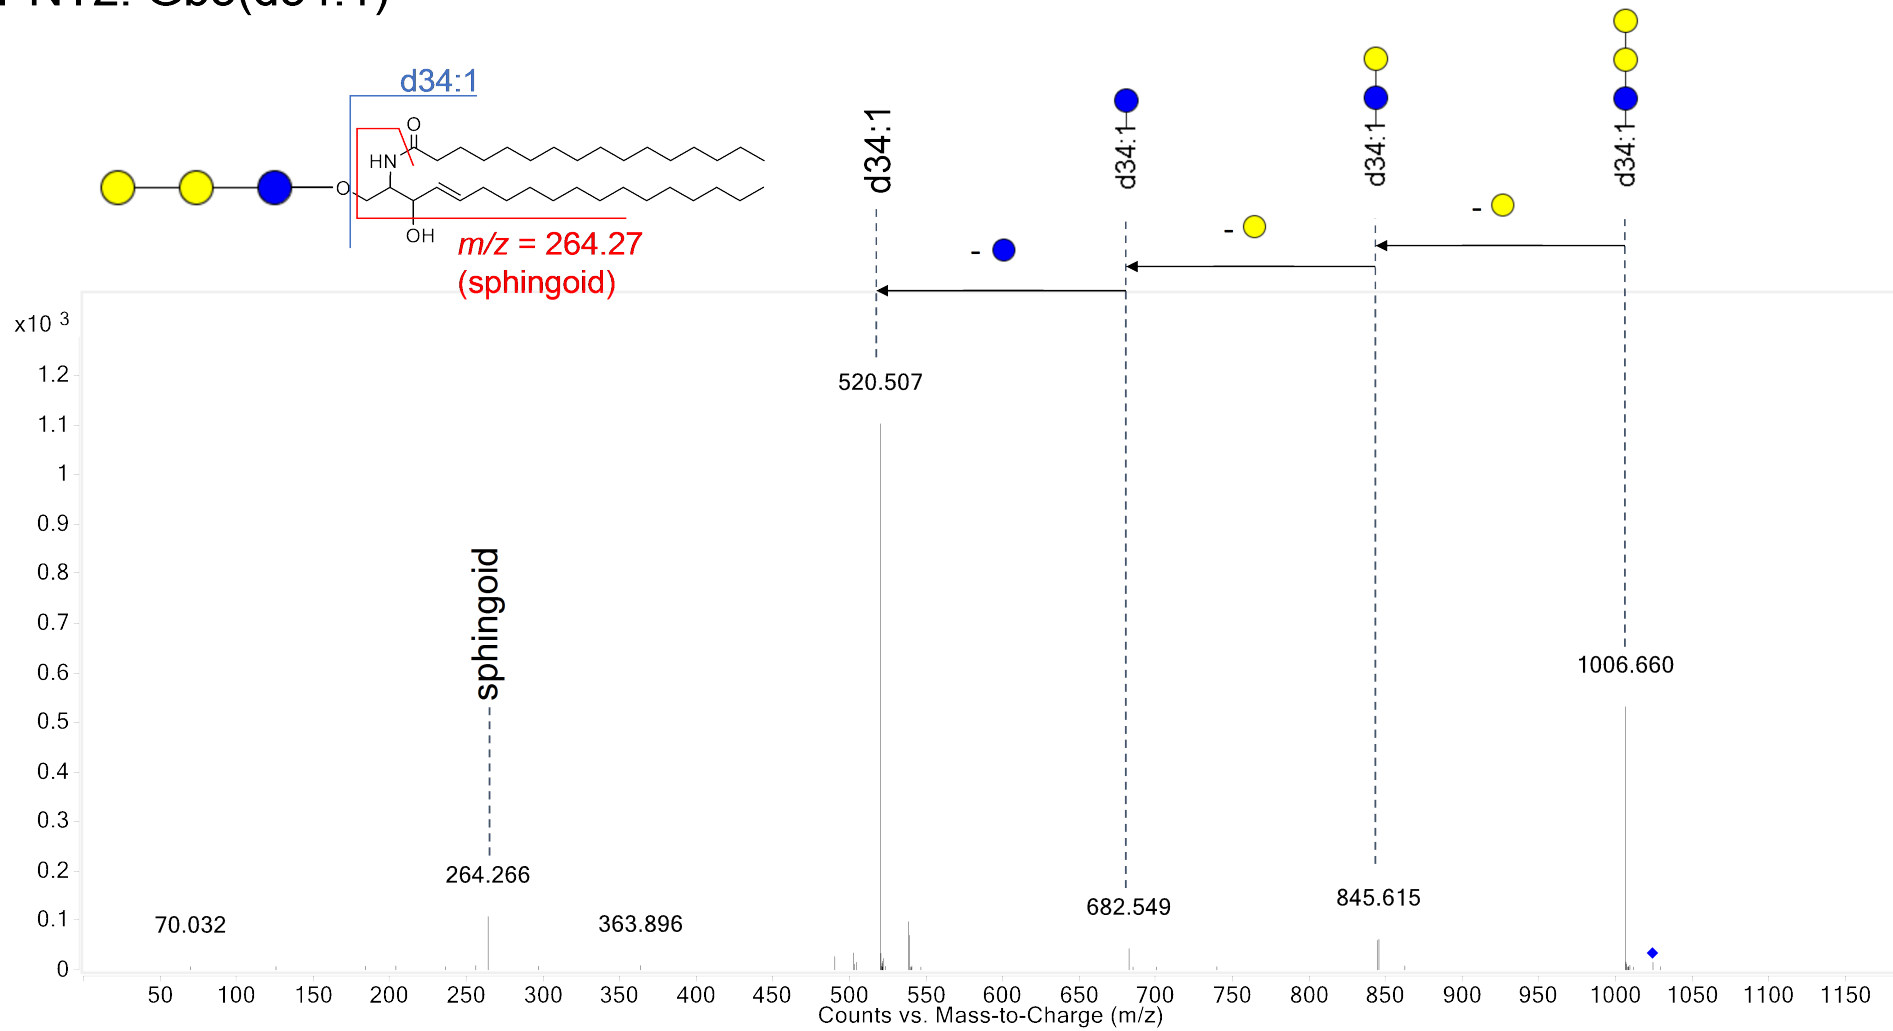

**Figure S18.** (A-E) CID fragmentation spectra of glycosphingolipid (GSL) structures derived from PNT2. Each spectrum displays a fragmentation event as specified by *m/z* and symbolic representation. The precursor ion is indicated by a blue diamond. Sequential losses are annotated inset. Gb, globo; Az, azido.



**B****PNT2: GM2(d42:1)**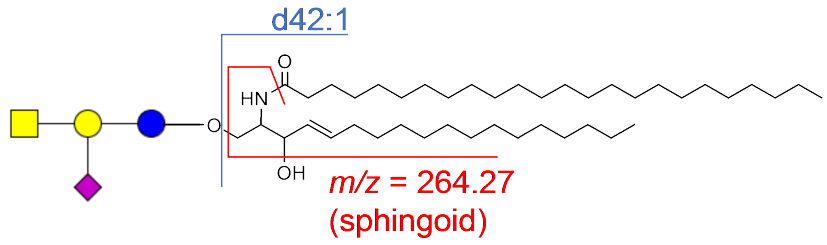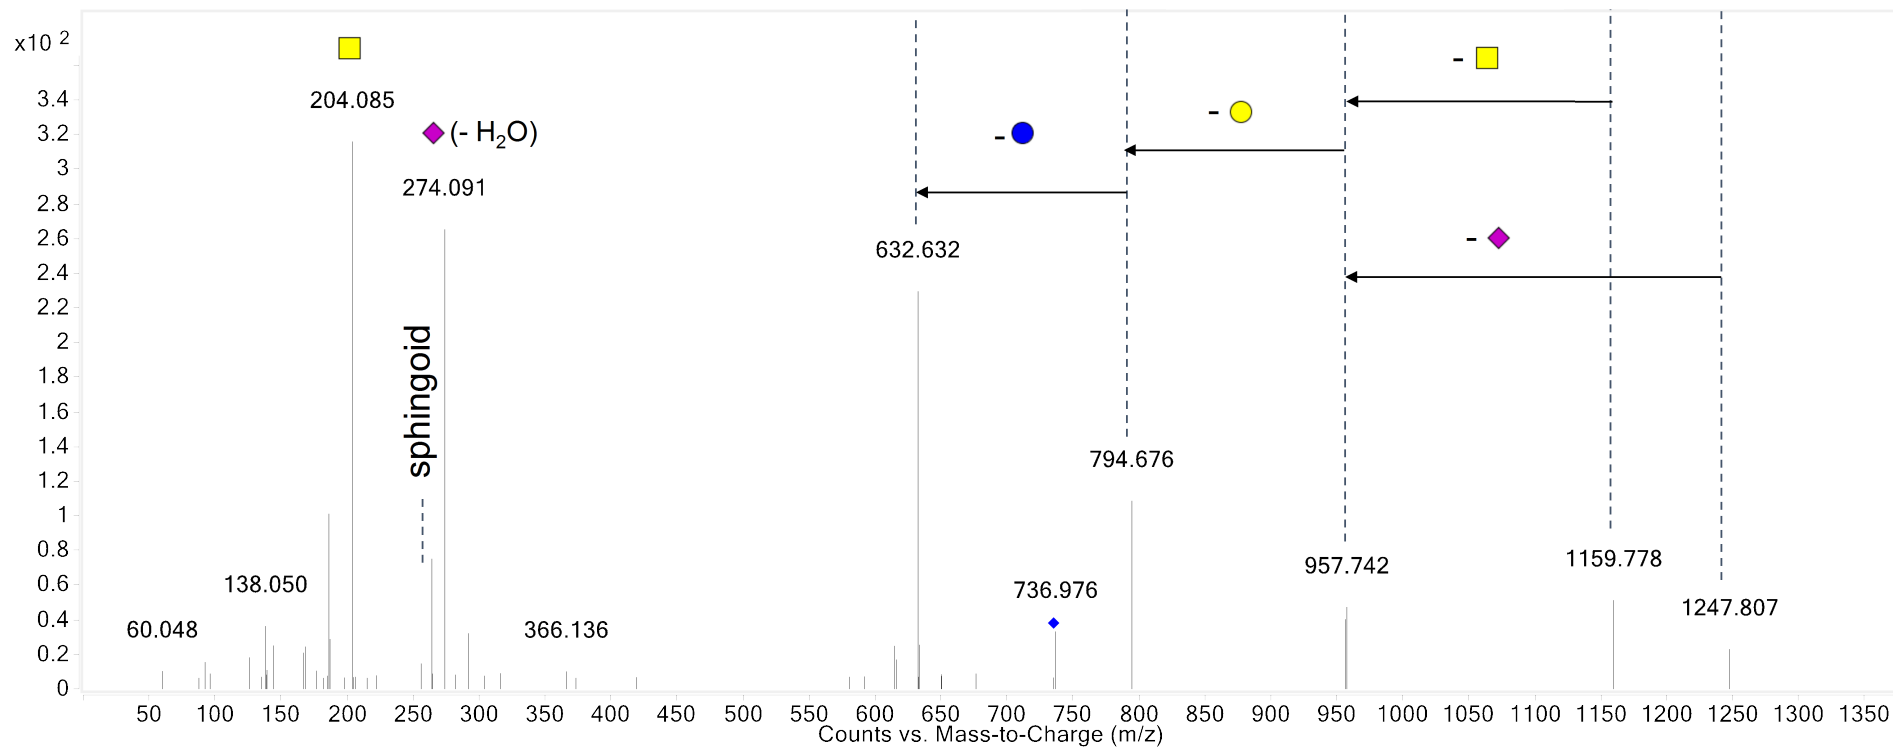

**C****PNT2: GD1(d34:1)**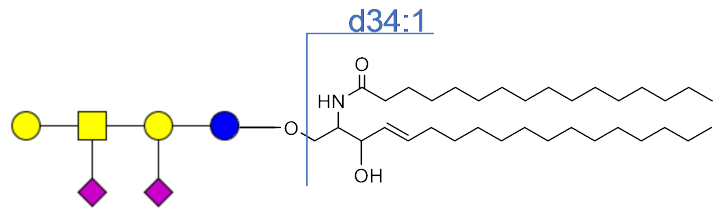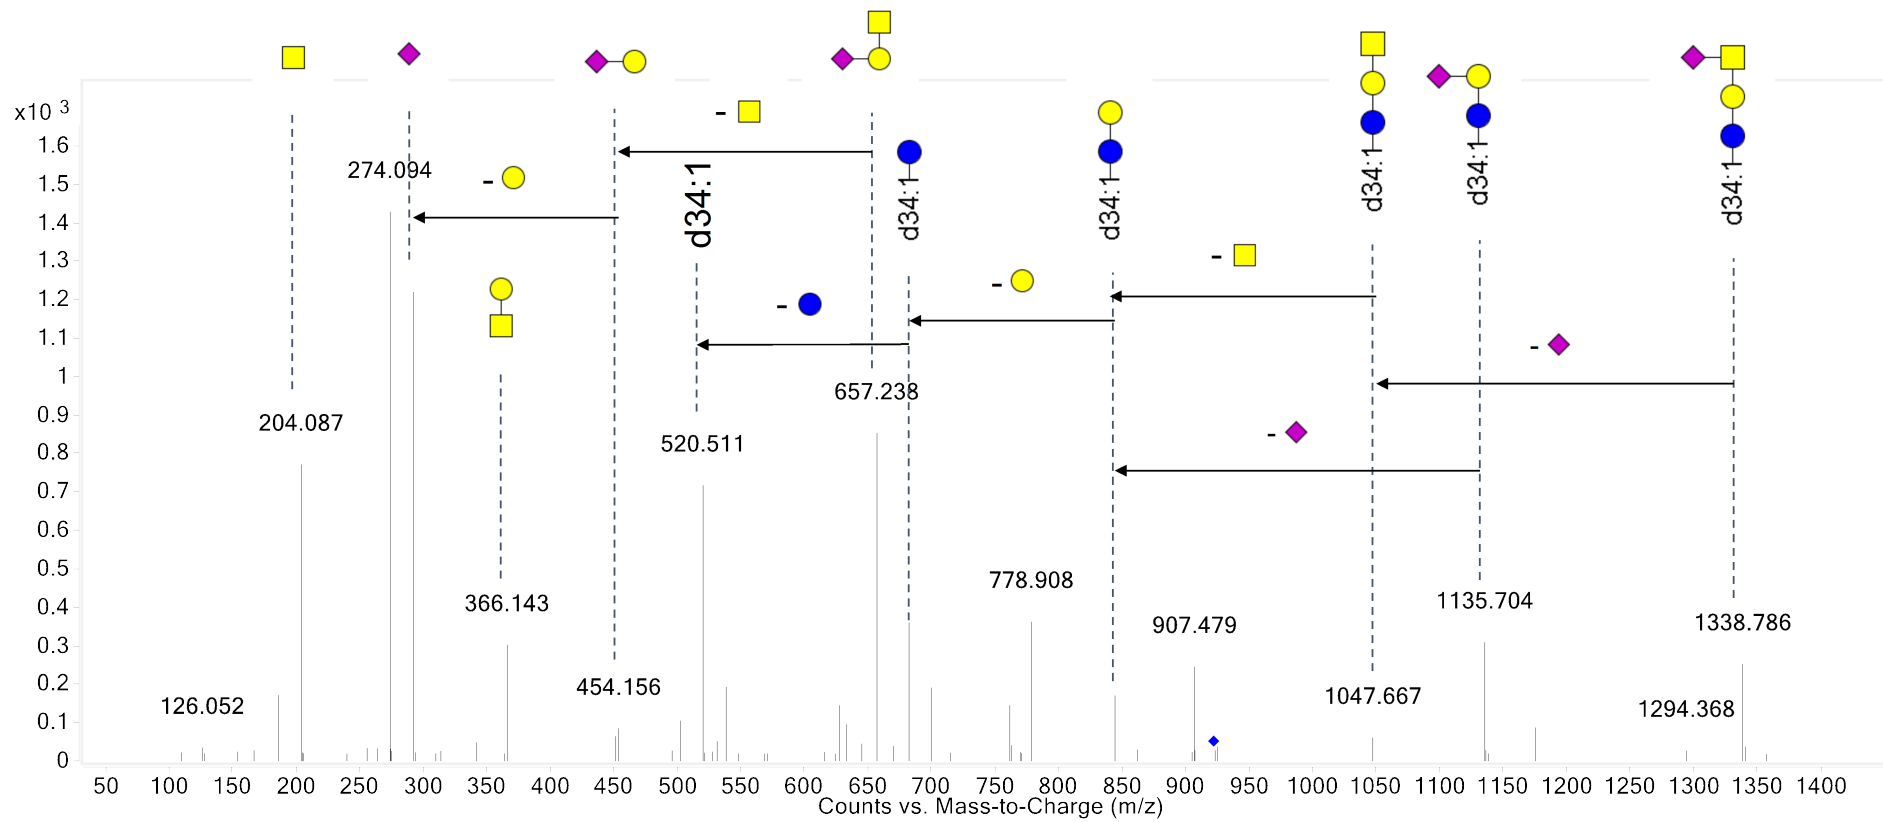

**D****PNT2: Az-GM2(d42:1)**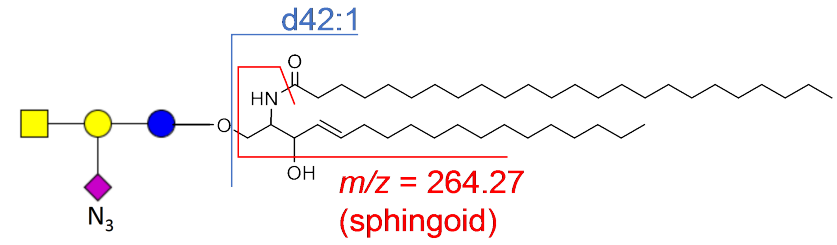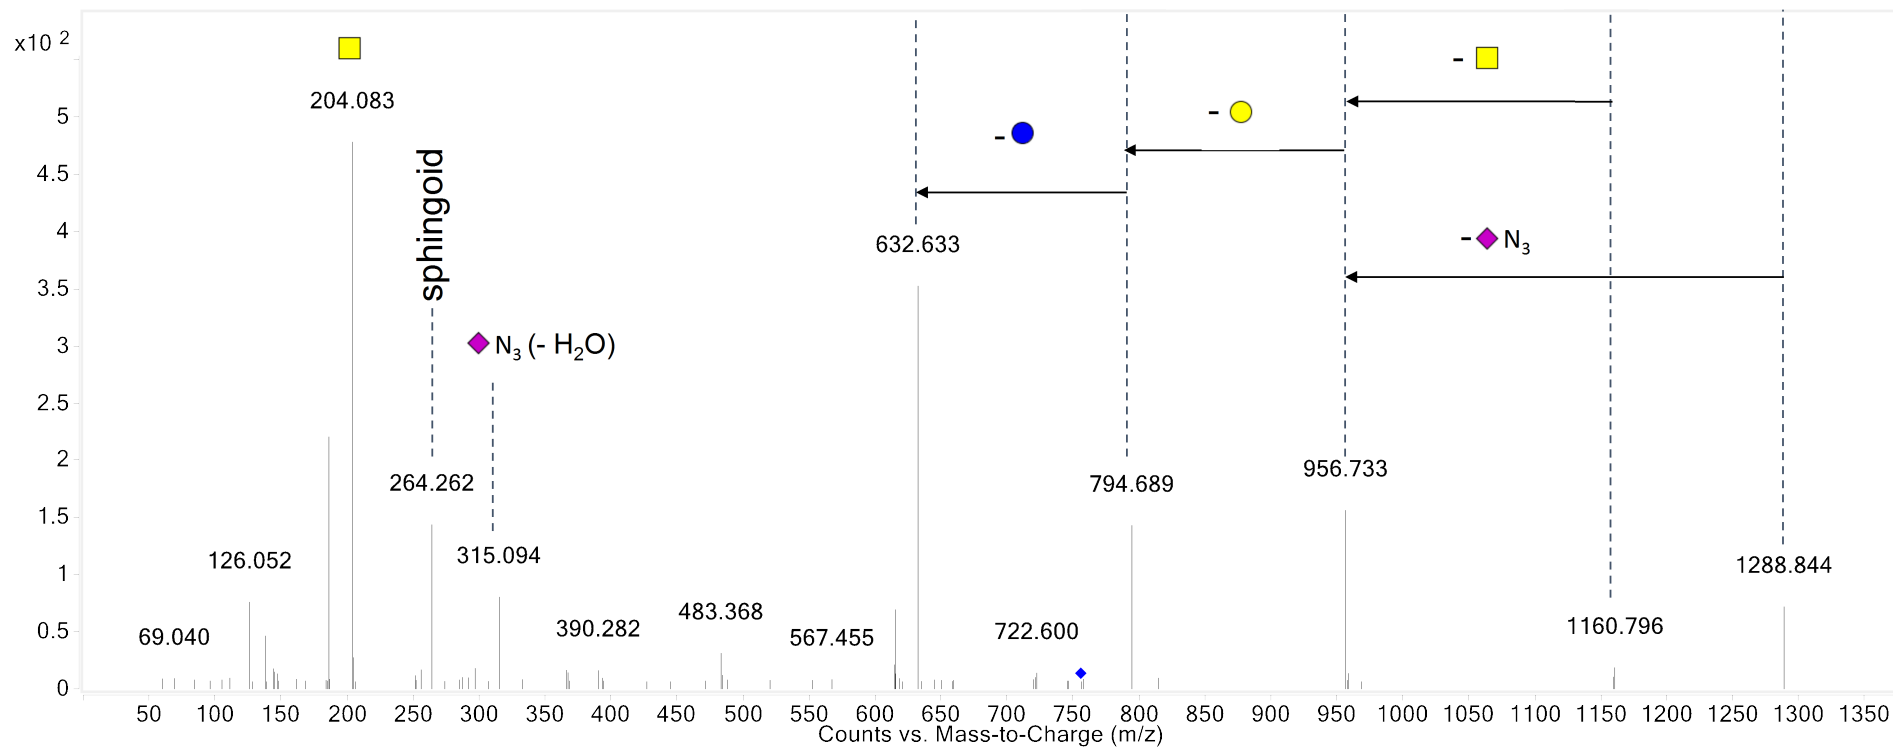

**E****PNT2: Az-GM2(d42:2)**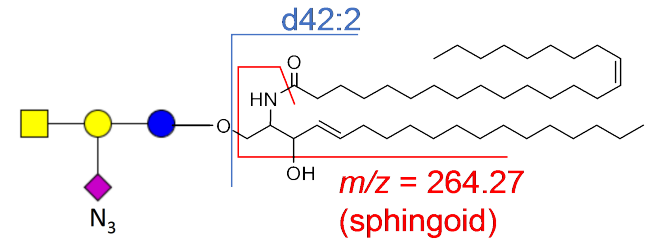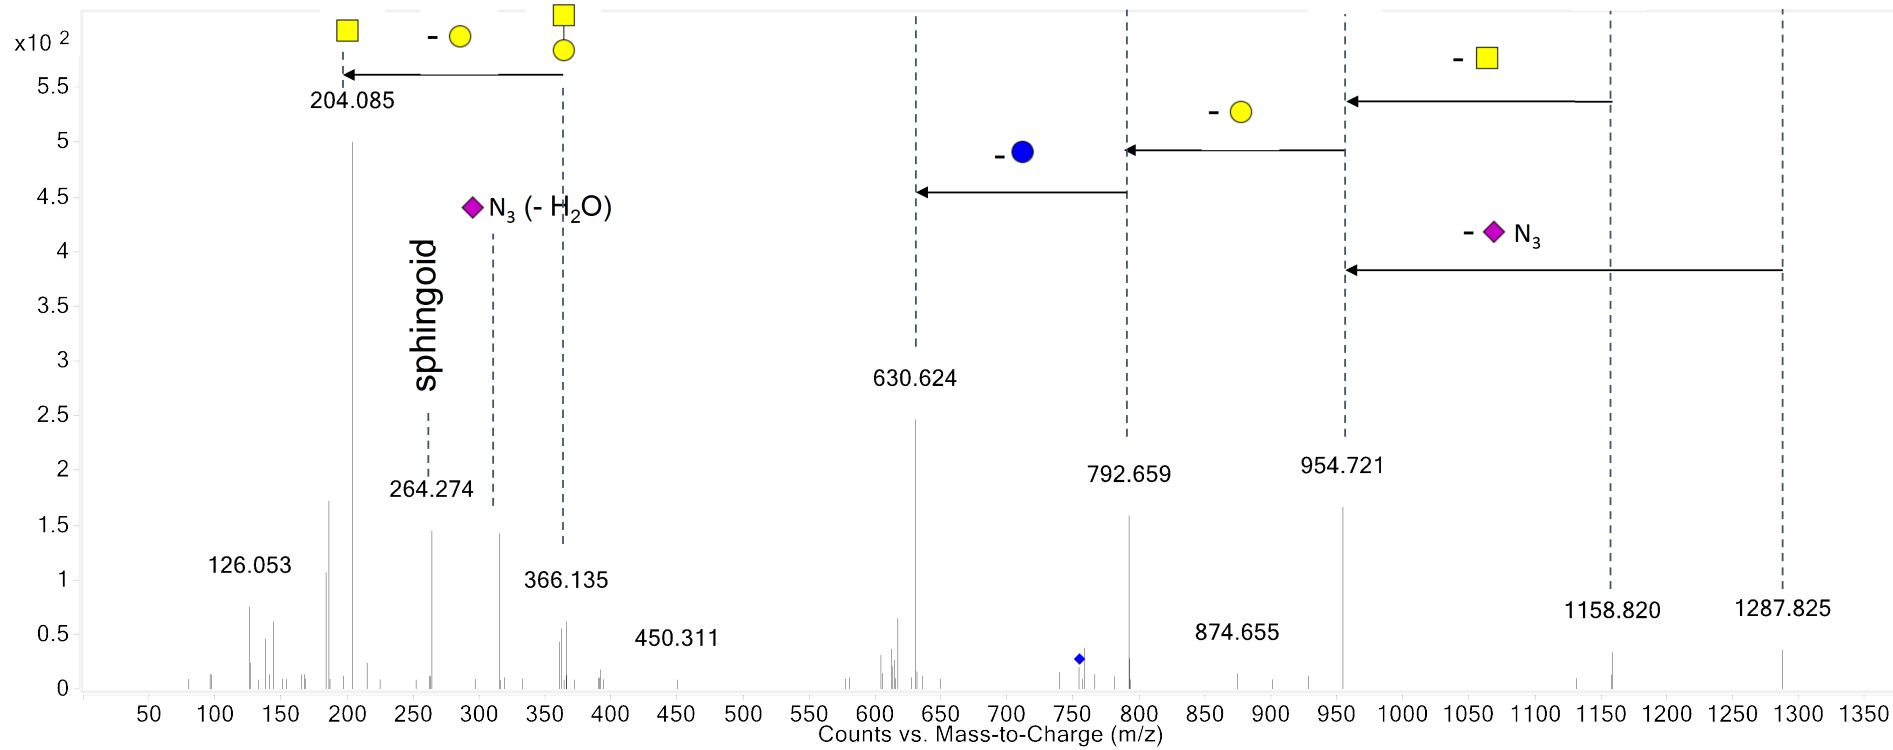

Supplement: SC-009-C8SC01875H-s001.pdf [file SC-009-C8SC01875H-s001.pdf]
