# Supplementary material for: Membrane glycomics reveal heterogeneity and quantitative distribution of cell surface sialylation
Source: Royal Society of Chemistry journal article supplement (doi:10.1039/c8sc01875h), 2018-01-01
Supplement: c8sc01875h2.xlsx [file c8sc01875h2.xlsx]

## Sheet: Summary
Table S2. Summary of cell surface glycoproteins and associated glycoforms identified on Caco-2.
UniProt Accession	Protein Name	Glycosylation Site	Glycan Composition	Extracellular Domain
O14672	Disintegrin and metalloproteinase domain-containing protein 10	N267	Hex(9)HexNAc(2)	N-terminus
O14672	Disintegrin and metalloproteinase domain-containing protein 10	N278	Hex(4)HexNAc(6)	N-terminus
O14672	Disintegrin and metalloproteinase domain-containing protein 10	N278	Hex(8)HexNAc(2)	N-terminus
O14672	Disintegrin and metalloproteinase domain-containing protein 10	N278	Hex(9)HexNAc(2)	N-terminus
O14672	Disintegrin and metalloproteinase domain-containing protein 10	N439	Hex(6)HexNAc(2)	N-terminus
O14672	Disintegrin and metalloproteinase domain-containing protein 10	N439	Hex(7)HexNAc(2)	N-terminus
O14672	Disintegrin and metalloproteinase domain-containing protein 10	N439	Hex(8)HexNAc(2)	N-terminus
O14672	Disintegrin and metalloproteinase domain-containing protein 10	N439	Hex(9)HexNAc(2)	N-terminus
O14672	Disintegrin and metalloproteinase domain-containing protein 10	N439	Hex(10)HexNAc(2)	N-terminus
O14672	Disintegrin and metalloproteinase domain-containing protein 10	N551	Hex(3)HexNAc(6)	N-terminus
O14672	Disintegrin and metalloproteinase domain-containing protein 10	N551	Hex(5)HexNAc(5)Fuc(1)	N-terminus
O14672	Disintegrin and metalloproteinase domain-containing protein 10	N551	Hex(5)HexNAc(5)Fuc(1)NeuAc(1)	N-terminus
O14672	Disintegrin and metalloproteinase domain-containing protein 10	N551	Hex(5)HexNAc(5)Fuc(3)	N-terminus
O14672	Disintegrin and metalloproteinase domain-containing protein 10	N551	Hex(5)HexNAc(5)Fuc(2)NeuAc(1)	N-terminus
O14672	Disintegrin and metalloproteinase domain-containing protein 10	N551	Hex(6)HexNAc(5)Fuc(1)NeuAc(1)	N-terminus
O14672	Disintegrin and metalloproteinase domain-containing protein 10	N551	Hex(7)HexNAc(2)	N-terminus
O14672	Disintegrin and metalloproteinase domain-containing protein 10	N551	Hex(8)HexNAc(2)	N-terminus
O14672	Disintegrin and metalloproteinase domain-containing protein 10	N551	Hex(9)HexNAc(2)	N-terminus
O15031	Plexin-B2	N127	Hex(4)HexNAc(5)Fuc(1)	N-terminus
O15031	Plexin-B2	N127	Hex(5)HexNAc(5)Fuc(1)	N-terminus
O15031	Plexin-B2	N127	Hex(8)HexNAc(2)	N-terminus
O15031	Plexin-B2	N127	Hex(9)HexNAc(2)	N-terminus
O15031	Plexin-B2	N528	Hex(5)HexNAc(2)	N-terminus
O15031	Plexin-B2	N528	Hex(5)HexNAc(5)	N-terminus
O15031	Plexin-B2	N528	Hex(5)HexNAc(5)NeuAc(1)	N-terminus
O15031	Plexin-B2	N528	Hex(6)HexNAc(2)	N-terminus
O15031	Plexin-B2	N528	Hex(9)HexNAc(2)	N-terminus
O15031	Plexin-B2	N733	Hex(5)HexNAc(4)Fuc(1)NeuAc(1)	N-terminus
O15031	Plexin-B2	N733	Hex(5)HexNAc(4)Fuc(1)NeuAc(2)	N-terminus
O15031	Plexin-B2	N733	Hex(5)HexNAc(4)Fuc(2)	N-terminus
O15031	Plexin-B2	N733	Hex(5)HexNAc(4)Fuc(2)NeuAc(1)	N-terminus
O15031	Plexin-B2	N733	Hex(5)HexNAc(5)NeuAc(1)	N-terminus
O15031	Plexin-B2	N733	Hex(5)HexNAc(5)Fuc(1)	N-terminus
O15031	Plexin-B2	N733	Hex(5)HexNAc(5)Fuc(1)NeuAc(1)	N-terminus
O15031	Plexin-B2	N733	Hex(5)HexNAc(5)Fuc(1)NeuAc(2)	N-terminus
O15031	Plexin-B2	N733	Hex(5)HexNAc(5)Fuc(2)	N-terminus
O15031	Plexin-B2	N733	Hex(5)HexNAc(5)Fuc(2)NeuAc(1)	N-terminus
O15031	Plexin-B2	N733	Hex(5)HexNAc(5)Fuc(3)	N-terminus
O15031	Plexin-B2	N733	Hex(5)HexNAc(5)Fuc(4)	N-terminus
O15031	Plexin-B2	N733	Hex(8)HexNAc(2)	N-terminus
O15031	Plexin-B2	N733	Hex(9)HexNAc(2)	N-terminus
O15031	Plexin-B2	N733	Hex(10)HexNAc(2)	N-terminus
O15031	Plexin-B2	N759	Hex(6)HexNAc(3)NeuAc(1)	N-terminus
O15031	Plexin-B2	N759	Hex(6)HexNAc(4)	N-terminus
O15031	Plexin-B2	N759	Hex(8)HexNAc(2)	N-terminus
O15031	Plexin-B2	N759	Hex(9)HexNAc(2)	N-terminus
O15031	Plexin-B2	N795	Hex(4)HexNAc(5)Fuc(2)NeuAc(1)	N-terminus
O15031	Plexin-B2	N795	Hex(5)HexNAc(5)Fuc(1)NeuAc(2)	N-terminus
O15031	Plexin-B2	N795	Hex(5)HexNAc(5)Fuc(2)NeuAc(1)	N-terminus
O15031	Plexin-B2	N795	Hex(5)HexNAc(5)Fuc(3)	N-terminus
O15031	Plexin-B2	N795	Hex(8)HexNAc(2)	N-terminus
O15031	Plexin-B2	N795	Hex(9)HexNAc(2)	N-terminus
O15031	Plexin-B2	N844	Hex(5)HexNAc(5)Fuc(1)NeuAc(1)	N-terminus
O15031	Plexin-B2	N844	Hex(5)HexNAc(5)Fuc(1)NeuAc(2)	N-terminus
O15031	Plexin-B2	N844	Hex(9)HexNAc(2)	N-terminus
O15031	Plexin-B2	N1002	Hex(5)HexNAc(2)	N-terminus
O15031	Plexin-B2	N1002	Hex(7)HexNAc(2)	N-terminus
O15031	Plexin-B2	N1002	Hex(8)HexNAc(2)	N-terminus
O15031	Plexin-B2	N1002	Hex(9)HexNAc(2)	N-terminus
O15031	Plexin-B2	N1099	Hex(4)HexNAc(3)Fuc(1)NeuAc(1)	N-terminus
O15031	Plexin-B2	N1099	Hex(4)HexNAc(4)Fuc(2)NeuAc(1)	N-terminus
O15031	Plexin-B2	N1099	Hex(4)HexNAc(5)Fuc(1)	N-terminus
O15031	Plexin-B2	N1099	Hex(4)HexNAc(5)Fuc(1)NeuAc(1)	N-terminus
O15031	Plexin-B2	N1099	Hex(4)HexNAc(6)	N-terminus
O15031	Plexin-B2	N1099	Hex(5)HexNAc(3)Fuc(1)NeuAc(1)	N-terminus
O15031	Plexin-B2	N1099	Hex(5)HexNAc(4)NeuAc(1)	N-terminus
O15031	Plexin-B2	N1099	Hex(5)HexNAc(5)Fuc(1)	N-terminus
O15031	Plexin-B2	N1099	Hex(5)HexNAc(5)Fuc(1)NeuAc(1)	N-terminus
O15031	Plexin-B2	N1099	Hex(5)HexNAc(5)Fuc(2)	N-terminus
O15031	Plexin-B2	N1099	Hex(5)HexNAc(5)NeuAc(1)	N-terminus
O15031	Plexin-B2	N1099	Hex(5)HexNAc(6)	N-terminus
O15031	Plexin-B2	N1099	Hex(5)HexNAc(6)Fuc(1)NeuAc(1)	N-terminus
O15031	Plexin-B2	N1099	Hex(5)HexNAc(6)Fuc(1)NeuAc(2)	N-terminus
O15031	Plexin-B2	N1099	Hex(6)HexNAc(4)Fuc(1)	N-terminus
O15031	Plexin-B2	N1099	Hex(6)HexNAc(4)Fuc(2)	N-terminus
O15031	Plexin-B2	N1099	Hex(6)HexNAc(5)Fuc(1)	N-terminus
O15031	Plexin-B2	N1099	Hex(6)HexNAc(5)Fuc(1)NeuAc(1)	N-terminus
O15031	Plexin-B2	N1099	Hex(6)HexNAc(5)Fuc(1)NeuAc(2)	N-terminus
O15031	Plexin-B2	N1099	Hex(6)HexNAc(5)Fuc(2)	N-terminus
O15031	Plexin-B2	N1099	Hex(6)HexNAc(6)Fuc(1)NeuAc(1)	N-terminus
O15031	Plexin-B2	N1099	Hex(6)HexNAc(6)Fuc(1)NeuAc(2)	N-terminus
O15031	Plexin-B2	N1099	Hex(6)HexNAc(6)Fuc(2)	N-terminus
O15031	Plexin-B2	N1099	Hex(6)HexNAc(6)Fuc(2)NeuAc(1)	N-terminus
O15031	Plexin-B2	N1099	Hex(6)HexNAc(6)Fuc(3)NeuAc(1)	N-terminus
O15031	Plexin-B2	N1099	Hex(6)HexNAc(6)Fuc(4)	N-terminus
O15031	Plexin-B2	N1099	Hex(6)HexNAc(6)NeuAc(1)	N-terminus
O15031	Plexin-B2	N1099	Hex(7)HexNAc(6)Fuc(2)NeuAc(1)	N-terminus
O15031	Plexin-B2	N1099	Hex(8)HexNAc(2)	N-terminus
O15031	Plexin-B2	N1099	Hex(9)HexNAc(2)	N-terminus
O15031	Plexin-B2	N1099	Hex(10)HexNAc(2)	N-terminus
O15230	Laminin subunit alpha-5	N95	Hex(5)HexNAc(2)	Extracellular
O15230	Laminin subunit alpha-5	N95	Hex(8)HexNAc(2)	Extracellular
O15230	Laminin subunit alpha-5	N1330	Hex(9)HexNAc(2)	Extracellular
O15230	Laminin subunit alpha-5	N2423	Hex(8)HexNAc(2)	Extracellular
O15230	Laminin subunit alpha-5	N2423	Hex(9)HexNAc(2)	Extracellular
O15230	Laminin subunit alpha-5	N2707	Hex(5)HexNAc(5)Fuc(1)NeuAc(1)	Extracellular
O43490	Prominin-1	N220	Hex(5)HexNAc(5)Fuc(1)	Loop
O43490	Prominin-1	N220	Hex(6)HexNAc(6)Fuc(3)	Loop
O43490	Prominin-1	N395	Hex(9)HexNAc(2)	Loop
O43657	Tetraspanin-6	N134	Hex(8)HexNAc(2)	Loop
O60449	Lymphocyte antigen 75	N135	Hex(5)HexNAc(5)Fuc(1)	N-terminus
O60449	Lymphocyte antigen 75	N135	Hex(5)HexNAc(5)Fuc(1)NeuAc(1)	N-terminus
O60449	Lymphocyte antigen 75	N135	Hex(5)HexNAc(5)Fuc(1)NeuAc(2)	N-terminus
O60449	Lymphocyte antigen 75	N135	Hex(5)HexNAc(5)Fuc(2)	N-terminus
O60449	Lymphocyte antigen 75	N135	Hex(9)HexNAc(2)	N-terminus
O60449	Lymphocyte antigen 75	N345	Hex(5)HexNAc(5)Fuc(1)NeuAc(1)	N-terminus
O60449	Lymphocyte antigen 75	N345	Hex(5)HexNAc(5)Fuc(1)NeuAc(2)	N-terminus
O60449	Lymphocyte antigen 75	N345	Hex(5)HexNAc(5)Fuc(2)NeuAc(1)	N-terminus
O60449	Lymphocyte antigen 75	N345	Hex(6)HexNAc(6)Fuc(2)NeuAc(1)	N-terminus
O60449	Lymphocyte antigen 75	N345	Hex(8)HexNAc(2)	N-terminus
O60449	Lymphocyte antigen 75	N345	Hex(9)HexNAc(2)	N-terminus
O60449	Lymphocyte antigen 75	N529	Hex(4)HexNAc(5)NeuAc(1)	N-terminus
O60449	Lymphocyte antigen 75	N529	Hex(4)HexNAc(6)	N-terminus
O60449	Lymphocyte antigen 75	N529	Hex(5)HexNAc(4)	N-terminus
O60449	Lymphocyte antigen 75	N529	Hex(5)HexNAc(4)Fuc(1)	N-terminus
O60449	Lymphocyte antigen 75	N529	Hex(5)HexNAc(4)Fuc(1)NeuAc(1)	N-terminus
O60449	Lymphocyte antigen 75	N529	Hex(5)HexNAc(4)Fuc(2)	N-terminus
O60449	Lymphocyte antigen 75	N529	Hex(5)HexNAc(4)NeuAc(1)	N-terminus
O60449	Lymphocyte antigen 75	N529	Hex(5)HexNAc(5)	N-terminus
O60449	Lymphocyte antigen 75	N529	Hex(5)HexNAc(5)Fuc(1)	N-terminus
O60449	Lymphocyte antigen 75	N529	Hex(5)HexNAc(5)Fuc(1)NeuAc(1)	N-terminus
O60449	Lymphocyte antigen 75	N529	Hex(5)HexNAc(5)Fuc(2)	N-terminus
O60449	Lymphocyte antigen 75	N529	Hex(5)HexNAc(5)NeuAc(1)	N-terminus
O60449	Lymphocyte antigen 75	N529	Hex(5)HexNAc(5)NeuAc(2)	N-terminus
O60449	Lymphocyte antigen 75	N529	Hex(6)HexNAc(4)	N-terminus
O60449	Lymphocyte antigen 75	N529	Hex(6)HexNAc(4)Fuc(1)	N-terminus
O60449	Lymphocyte antigen 75	N529	Hex(6)HexNAc(4)NeuAc(1)	N-terminus
O60449	Lymphocyte antigen 75	N529	Hex(6)HexNAc(5)Fuc(1)	N-terminus
O60449	Lymphocyte antigen 75	N529	Hex(6)HexNAc(6)Fuc(3)	N-terminus
O60449	Lymphocyte antigen 75	N529	Hex(7)HexNAc(4)	N-terminus
O60449	Lymphocyte antigen 75	N529	Hex(7)HexNAc(4)NeuAc(1)	N-terminus
O60449	Lymphocyte antigen 75	N529	Hex(9)HexNAc(2)	N-terminus
O60449	Lymphocyte antigen 75	N529	Hex(10)HexNAc(2)	N-terminus
O60449	Lymphocyte antigen 75	N865	Hex(5)HexNAc(5)Fuc(1)NeuAc(1)	N-terminus
O60449	Lymphocyte antigen 75	N865	Hex(5)HexNAc(5)Fuc(1)NeuAc(2)	N-terminus
O60449	Lymphocyte antigen 75	N865	Hex(5)HexNAc(5)Fuc(2)NeuAc(1)	N-terminus
O60449	Lymphocyte antigen 75	N865	Hex(9)HexNAc(2)	N-terminus
O60449	Lymphocyte antigen 75	N934	Hex(4)HexNAc(5)Fuc(1)	N-terminus
O60449	Lymphocyte antigen 75	N934	Hex(5)HexNAc(5)Fuc(1)	N-terminus
O60449	Lymphocyte antigen 75	N934	Hex(6)HexNAc(6)Fuc(1)	N-terminus
O60449	Lymphocyte antigen 75	N1103	Hex(5)HexNAc(5)Fuc(1)	N-terminus
O60449	Lymphocyte antigen 75	N1103	Hex(5)HexNAc(5)Fuc(1)NeuAc(2)	N-terminus
O60449	Lymphocyte antigen 75	N1225	Hex(5)HexNAc(5)Fuc(1)	N-terminus
O60449	Lymphocyte antigen 75	N1225	Hex(5)HexNAc(5)Fuc(1)NeuAc(1)	N-terminus
O60449	Lymphocyte antigen 75	N1225	Hex(5)HexNAc(5)Fuc(1)NeuAc(2)	N-terminus
O60449	Lymphocyte antigen 75	N1225	Hex(5)HexNAc(5)Fuc(2)	N-terminus
O60449	Lymphocyte antigen 75	N1225	Hex(5)HexNAc(5)Fuc(2)NeuAc(1)	N-terminus
O60449	Lymphocyte antigen 75	N1225	Hex(5)HexNAc(5)NeuAc(1)	N-terminus
O60449	Lymphocyte antigen 75	N1225	Hex(6)HexNAc(6)Fuc(2)NeuAc(1)	N-terminus
O60449	Lymphocyte antigen 75	N1225	Hex(6)HexNAc(6)Fuc(2)NeuAc(2)	N-terminus
O60449	Lymphocyte antigen 75	N1225	Hex(9)HexNAc(2)	N-terminus
O60449	Lymphocyte antigen 75	N1225	Hex(10)HexNAc(2)	N-terminus
O60449	Lymphocyte antigen 75	N1593	Hex(7)HexNAc(2)	N-terminus
O60449	Lymphocyte antigen 75	N1593	Hex(8)HexNAc(2)	N-terminus
O60449	Lymphocyte antigen 75	N1593	Hex(9)HexNAc(2)	N-terminus
O60449	Lymphocyte antigen 75	N1642	Hex(8)HexNAc(2)	N-terminus
O60486	Plexin-C1	N821	Hex(7)HexNAc(2)	N-terminus
O60487	Myelin protein zero-like protein 2	N39	Hex(4)HexNAc(3)Fuc(1)NeuAc(1)	Loop
O60487	Myelin protein zero-like protein 2	N39	Hex(4)HexNAc(5)Fuc(1)	Loop
O60487	Myelin protein zero-like protein 2	N39	Hex(5)HexNAc(4)Fuc(1)	Loop
O60487	Myelin protein zero-like protein 2	N39	Hex(5)HexNAc(4)Fuc(1)NeuAc(1)	Loop
O60487	Myelin protein zero-like protein 2	N39	Hex(5)HexNAc(5)Fuc(1)NeuAc(1)	Loop
O60487	Myelin protein zero-like protein 2	N39	Hex(5)HexNAc(5)NeuAc(1)	Loop
O60487	Myelin protein zero-like protein 2	N39	Hex(6)HexNAc(3)NeuAc(1)	Loop
O60487	Myelin protein zero-like protein 2	N39	Hex(9)HexNAc(2)	Loop
O60487	Myelin protein zero-like protein 2	N39	Hex(10)HexNAc(2)	Loop
O60487	Myelin protein zero-like protein 2	N118	Hex(6)HexNAc(2)	Loop
O60487	Myelin protein zero-like protein 2	N118	Hex(6)HexNAc(3)	Loop
O60487	Myelin protein zero-like protein 2	N118	Hex(6)HexNAc(3)NeuAc(1)	Loop
O60487	Myelin protein zero-like protein 2	N118	Hex(7)HexNAc(2)	Loop
O60487	Myelin protein zero-like protein 2	N118	Hex(8)HexNAc(2)	Loop
O60494	Cubilin	N105	Hex(8)HexNAc(2)	Extracellular
O60635	Tetraspanin-1	N154	Hex(5)HexNAc(3)Fuc(1)NeuAc(1)	Loop
O60635	Tetraspanin-1	N154	Hex(8)HexNAc(2)	Loop
O60637	Tetraspanin-3	N127	Hex(9)HexNAc(2)	Loop
O60637	Tetraspanin-3	N167	Hex(3)HexNAc(3)Fuc(1)	Loop
O60637	Tetraspanin-3	N167	Hex(3)HexNAc(5)Fuc(1)	Loop
O60637	Tetraspanin-3	N167	Hex(4)HexNAc(3)	Loop
O60637	Tetraspanin-3	N167	Hex(4)HexNAc(3)Fuc(1)	Loop
O60637	Tetraspanin-3	N167	Hex(4)HexNAc(3)Fuc(1)NeuAc(1)	Loop
O60637	Tetraspanin-3	N167	Hex(4)HexNAc(3)NeuAc(1)	Loop
O60637	Tetraspanin-3	N167	Hex(4)HexNAc(4)Fuc(1)	Loop
O60637	Tetraspanin-3	N167	Hex(4)HexNAc(5)Fuc(1)	Loop
O60637	Tetraspanin-3	N167	Hex(4)HexNAc(6)Fuc(1)	Loop
O60637	Tetraspanin-3	N167	Hex(5)HexNAc(2)	Loop
O60637	Tetraspanin-3	N167	Hex(5)HexNAc(3)Fuc(1)	Loop
O60637	Tetraspanin-3	N167	Hex(5)HexNAc(3)Fuc(1)NeuAc(1)	Loop
O60637	Tetraspanin-3	N167	Hex(5)HexNAc(3)NeuAc(1)	Loop
O60637	Tetraspanin-3	N167	Hex(5)HexNAc(4)	Loop
O60637	Tetraspanin-3	N167	Hex(5)HexNAc(4)Fuc(1)	Loop
O60637	Tetraspanin-3	N167	Hex(5)HexNAc(6)Fuc(1)	Loop
O60637	Tetraspanin-3	N167	Hex(6)HexNAc(2)	Loop
O60637	Tetraspanin-3	N167	Hex(6)HexNAc(3)NeuAc(1)	Loop
O60637	Tetraspanin-3	N167	Hex(7)HexNAc(2)	Loop
O60637	Tetraspanin-3	N167	Hex(8)HexNAc(2)	Loop
O60637	Tetraspanin-3	N167	Hex(9)HexNAc(2)	Loop
O60637	Tetraspanin-3	N167	Hex(10)HexNAc(2)	Loop
O75054	Immunoglobulin superfamily member 3	N101	Hex(3)HexNAc(5)Fuc(1)	N-terminus
O75054	Immunoglobulin superfamily member 3	N101	Hex(4)HexNAc(5)	N-terminus
O75054	Immunoglobulin superfamily member 3	N101	Hex(4)HexNAc(5)Fuc(1)	N-terminus
O75054	Immunoglobulin superfamily member 3	N700	Hex(5)HexNAc(4)	N-terminus
O75054	Immunoglobulin superfamily member 3	N700	Hex(6)HexNAc(4)	N-terminus
O75054	Immunoglobulin superfamily member 3	N700	Hex(7)HexNAc(2)	N-terminus
O75054	Immunoglobulin superfamily member 3	N700	Hex(8)HexNAc(2)	N-terminus
O75197	Low-density lipoprotein receptor-related protein 5	N138	Hex(9)HexNAc(2)	N-terminus
O75197	Low-density lipoprotein receptor-related protein 5	N940	Hex(5)HexNAc(5)Fuc(1)NeuAc(1)	N-terminus
O75309	Cadherin-16	N602	Hex(5)HexNAc(5)Fuc(1)NeuAc(2)	N-terminus
O75718	Cartilage-associated protein	N87	Hex(6)HexNAc(2)	Extracellular
O75882	Attractin	N264	Hex(6)HexNAc(3)	N-terminus
O75882	Attractin	N264	Hex(8)HexNAc(2)	N-terminus
O75882	Attractin	N264	Hex(9)HexNAc(2)	N-terminus
O75882	Attractin	N300	Hex(7)HexNAc(2)	N-terminus
O75882	Attractin	N300	Hex(8)HexNAc(2)	N-terminus
O75882	Attractin	N300	Hex(9)HexNAc(2)	N-terminus
O75882	Attractin	N325	Hex(9)HexNAc(2)	N-terminus
O75882	Attractin	N383	Hex(8)HexNAc(2)	N-terminus
O75882	Attractin	N383	Hex(9)HexNAc(2)	N-terminus
O75882	Attractin	N416	Hex(7)HexNAc(2)	N-terminus
O75882	Attractin	N416	Hex(8)HexNAc(2)	N-terminus
O75882	Attractin	N416	Hex(9)HexNAc(2)	N-terminus
O75882	Attractin	N428	Hex(9)HexNAc(2)	N-terminus
O75882	Attractin	N731	Hex(7)HexNAc(2)	N-terminus
O75882	Attractin	N731	Hex(8)HexNAc(2)	N-terminus
O75882	Attractin	N731	Hex(9)HexNAc(2)	N-terminus
O75882	Attractin	N1054	Hex(8)HexNAc(2)	N-terminus
O75882	Attractin	N1054	Hex(9)HexNAc(2)	N-terminus
O75882	Attractin	N1073	Hex(8)HexNAc(2)	N-terminus
O75882	Attractin	N1082	Hex(8)HexNAc(2)	N-terminus
O75882	Attractin	N1082	Hex(9)HexNAc(2)	N-terminus
O75882	Attractin	N1198	Hex(9)HexNAc(2)	N-terminus
O75976	Carboxypeptidase D	N172	Hex(4)HexNAc(4)Fuc(2)NeuAc(1)	N-terminus
O75976	Carboxypeptidase D	N172	Hex(4)HexNAc(5)Fuc(1)	N-terminus
O75976	Carboxypeptidase D	N172	Hex(4)HexNAc(5)Fuc(1)NeuAc(1)	N-terminus
O75976	Carboxypeptidase D	N172	Hex(4)HexNAc(5)Fuc(3)	N-terminus
O75976	Carboxypeptidase D	N172	Hex(4)HexNAc(6)	N-terminus
O75976	Carboxypeptidase D	N172	Hex(5)HexNAc(4)Fuc(1)NeuAc(1)	N-terminus
O75976	Carboxypeptidase D	N172	Hex(5)HexNAc(4)Fuc(2)NeuAc(1)	N-terminus
O75976	Carboxypeptidase D	N172	Hex(5)HexNAc(5)Fuc(1)	N-terminus
O75976	Carboxypeptidase D	N172	Hex(5)HexNAc(5)Fuc(1)NeuAc(1)	N-terminus
O75976	Carboxypeptidase D	N172	Hex(5)HexNAc(5)Fuc(1)NeuAc(2)	N-terminus
O75976	Carboxypeptidase D	N172	Hex(5)HexNAc(5)Fuc(2)	N-terminus
O75976	Carboxypeptidase D	N172	Hex(5)HexNAc(5)Fuc(2)NeuAc(1)	N-terminus
O75976	Carboxypeptidase D	N172	Hex(5)HexNAc(5)Fuc(3)	N-terminus
O75976	Carboxypeptidase D	N172	Hex(5)HexNAc(5)Fuc(3)NeuAc(1)	N-terminus
O75976	Carboxypeptidase D	N172	Hex(5)HexNAc(5)NeuAc(2)	N-terminus
O75976	Carboxypeptidase D	N172	Hex(5)HexNAc(6)NeuAc(1)	N-terminus
O75976	Carboxypeptidase D	N172	Hex(6)HexNAc(4)Fuc(1)NeuAc(1)	N-terminus
O75976	Carboxypeptidase D	N172	Hex(6)HexNAc(5)Fuc(1)	N-terminus
O75976	Carboxypeptidase D	N172	Hex(6)HexNAc(5)Fuc(1)NeuAc(1)	N-terminus
O75976	Carboxypeptidase D	N172	Hex(6)HexNAc(5)Fuc(1)NeuAc(2)	N-terminus
O75976	Carboxypeptidase D	N172	Hex(6)HexNAc(5)Fuc(2)	N-terminus
O75976	Carboxypeptidase D	N172	Hex(6)HexNAc(5)Fuc(2)NeuAc(1)	N-terminus
O75976	Carboxypeptidase D	N172	Hex(6)HexNAc(5)Fuc(3)	N-terminus
O75976	Carboxypeptidase D	N172	Hex(6)HexNAc(5)Fuc43)	N-terminus
O75976	Carboxypeptidase D	N172	Hex(6)HexNAc(5)NeuAc(2)	N-terminus
O75976	Carboxypeptidase D	N172	Hex(6)HexNAc(6)Fuc(1)NeuAc(1)	N-terminus
O75976	Carboxypeptidase D	N172	Hex(6)HexNAc(6)Fuc(1)NeuAc(2)	N-terminus
O75976	Carboxypeptidase D	N172	Hex(6)HexNAc(6)Fuc(2)NeuAc(1)	N-terminus
O75976	Carboxypeptidase D	N172	Hex(6)HexNAc(6)Fuc(3)	N-terminus
O75976	Carboxypeptidase D	N172	Hex(6)HexNAc(6)Fuc(3)NeuAc(1)	N-terminus
O75976	Carboxypeptidase D	N172	Hex(6)HexNAc(6)Fuc(4)	N-terminus
O75976	Carboxypeptidase D	N172	Hex(6)HexNAc(6)NeuAc(2)	N-terminus
O75976	Carboxypeptidase D	N172	Hex(7)HexNAc(5)Fuc(2)	N-terminus
O75976	Carboxypeptidase D	N172	Hex(7)HexNAc(5)NeuAc(1)	N-terminus
O75976	Carboxypeptidase D	N172	Hex(7)HexNAc(6)Fuc(2)	N-terminus
O75976	Carboxypeptidase D	N172	Hex(7)HexNAc(6)Fuc(3)	N-terminus
O75976	Carboxypeptidase D	N172	Hex(8)HexNAc(2)	N-terminus
O75976	Carboxypeptidase D	N172	Hex(9)HexNAc(2)	N-terminus
O75976	Carboxypeptidase D	N172	Hex(10)HexNAc(2)	N-terminus
O75976	Carboxypeptidase D	N522	Hex(5)HexNAc(5)Fuc(1)NeuAc(2)	N-terminus
O75976	Carboxypeptidase D	N522	Hex(5)HexNAc(5)Fuc(2)NeuAc(1)	N-terminus
O75976	Carboxypeptidase D	N522	Hex(9)HexNAc(2)	N-terminus
O75976	Carboxypeptidase D	N626	Hex(5)HexNAc(3)	N-terminus
O75976	Carboxypeptidase D	N626	Hex(5)HexNAc(3)NeuAc(1)	N-terminus
O75976	Carboxypeptidase D	N626	Hex(5)HexNAc(5)NeuAc(1)	N-terminus
O75976	Carboxypeptidase D	N626	Hex(6)HexNAc(3)NeuAc(1)	N-terminus
O75976	Carboxypeptidase D	N626	Hex(6)HexNAc(4)Fuc(1)NeuAc(1)	N-terminus
O75976	Carboxypeptidase D	N626	Hex(6)HexNAc(4)NeuAc(1)	N-terminus
O75976	Carboxypeptidase D	N626	Hex(7)HexNAc(4)Fuc(2)	N-terminus
O75976	Carboxypeptidase D	N626	Hex(7)HexNAc(4)NeuAc(1)	N-terminus
O75976	Carboxypeptidase D	N626	Hex(9)HexNAc(2)	N-terminus
O75976	Carboxypeptidase D	N811	Hex(4)HexNAc(5)NeuAc(1)	N-terminus
O75976	Carboxypeptidase D	N811	Hex(5)HexNAc(5)	N-terminus
O75976	Carboxypeptidase D	N811	Hex(5)HexNAc(5)NeuAc(1)	N-terminus
O75976	Carboxypeptidase D	N811	Hex(6)HexNAc(3)NeuAc(1)	N-terminus
O75976	Carboxypeptidase D	N811	Hex(6)HexNAc(4)	N-terminus
O75976	Carboxypeptidase D	N811	Hex(6)HexNAc(4)Fuc(1)	N-terminus
O75976	Carboxypeptidase D	N811	Hex(7)HexNAc(4)	N-terminus
O75976	Carboxypeptidase D	N811	Hex(9)HexNAc(2)	N-terminus
O75976	Carboxypeptidase D	N855	Hex(4)HexNAc(5)Fuc(1)	N-terminus
O75976	Carboxypeptidase D	N855	Hex(5)HexNAc(5)Fuc(1)	N-terminus
O75976	Carboxypeptidase D	N855	Hex(5)HexNAc(5)Fuc(1)NeuAc(1)	N-terminus
O75976	Carboxypeptidase D	N855	Hex(5)HexNAc(5)Fuc(1)NeuAc(2)	N-terminus
O75976	Carboxypeptidase D	N855	Hex(5)HexNAc(5)Fuc(2)	N-terminus
O75976	Carboxypeptidase D	N855	Hex(5)HexNAc(5)Fuc(2)NeuAc(1)	N-terminus
O75976	Carboxypeptidase D	N855	Hex(5)HexNAc(5)NeuAc(2)	N-terminus
O75976	Carboxypeptidase D	N855	Hex(6)HexNAc(6)Fuc(1)NeuAc(1)	N-terminus
O75976	Carboxypeptidase D	N867	Hex(5)HexNAc(5)Fuc(1)NeuAc(2)	N-terminus
O75976	Carboxypeptidase D	N955	Hex(6)HexNAc(2)	N-terminus
O75976	Carboxypeptidase D	N955	Hex(7)HexNAc(2)	N-terminus
O75976	Carboxypeptidase D	N955	Hex(8)HexNAc(2)	N-terminus
O75976	Carboxypeptidase D	N955	Hex(9)HexNAc(2)	N-terminus
O75976	Carboxypeptidase D	N978	Hex(4)HexNAc(5)Fuc(1)	N-terminus
O75976	Carboxypeptidase D	N978	Hex(4)HexNAc(5)Fuc(1)NeuAc(1)	N-terminus
O75976	Carboxypeptidase D	N978	Hex(4)HexNAc(5)NeuAc(1)	N-terminus
O75976	Carboxypeptidase D	N978	Hex(4)HexNAc(6)Fuc(4)	N-terminus
O75976	Carboxypeptidase D	N978	Hex(5)HexNAc(4)Fuc(1)	N-terminus
O75976	Carboxypeptidase D	N978	Hex(5)HexNAc(4)Fuc(1)NeuAc(1)	N-terminus
O75976	Carboxypeptidase D	N978	Hex(5)HexNAc(4)Fuc(1)NeuAc(2)	N-terminus
O75976	Carboxypeptidase D	N978	Hex(5)HexNAc(5)Fuc(1)	N-terminus
O75976	Carboxypeptidase D	N978	Hex(5)HexNAc(5)Fuc(1)NeuAc(1)	N-terminus
O75976	Carboxypeptidase D	N978	Hex(5)HexNAc(5)Fuc(1)NeuAc(2)	N-terminus
O75976	Carboxypeptidase D	N978	Hex(5)HexNAc(5)Fuc(2)	N-terminus
O75976	Carboxypeptidase D	N978	Hex(5)HexNAc(5)Fuc(2)NeuAc(1)	N-terminus
O75976	Carboxypeptidase D	N978	Hex(5)HexNAc(6)Fuc(1)NeuAc(1)	N-terminus
O75976	Carboxypeptidase D	N978	Hex(5)HexNAc(6)Fuc(2)	N-terminus
O75976	Carboxypeptidase D	N978	Hex(6)HexNAc(5)Fuc(1)NeuAc(1)	N-terminus
O75976	Carboxypeptidase D	N978	Hex(6)HexNAc(5)Fuc(2)NeuAc(1)	N-terminus
O75976	Carboxypeptidase D	N978	Hex(5)HexNAc(5)NeuAc(1)	N-terminus
O75976	Carboxypeptidase D	N978	Hex(6)HexNAc(6)Fuc(1)NeuAc(1)	N-terminus
O75976	Carboxypeptidase D	N978	Hex(6)HexNAc(6)Fuc(1)NeuAc(2)	N-terminus
O75976	Carboxypeptidase D	N978	Hex(6)HexNAc(6)Fuc(2)	N-terminus
O75976	Carboxypeptidase D	N978	Hex(6)HexNAc(6)Fuc(2)NeuAc(1)	N-terminus
O75976	Carboxypeptidase D	N978	Hex(6)HexNAc(6)Fuc(3)NeuAc(1)	N-terminus
O75976	Carboxypeptidase D	N978	Hex(9)HexNAc(2)	N-terminus
O75976	Carboxypeptidase D	N978	Hex(10)HexNAc(2)	N-terminus
O75976	Carboxypeptidase D	N1070	Hex(4)HexNAc(3)Fuc(1)NeuAc(1)	N-terminus
O75976	Carboxypeptidase D	N1070	Hex(4)HexNAc(5)Fuc(1)	N-terminus
O75976	Carboxypeptidase D	N1070	Hex(4)HexNAc(5)Fuc(1)NeuAc(1)	N-terminus
O75976	Carboxypeptidase D	N1070	Hex(4)HexNAc(5)Fuc(2)	N-terminus
O75976	Carboxypeptidase D	N1070	Hex(5)HexNAc(3)Fuc(1)NeuAc(1)	N-terminus
O75976	Carboxypeptidase D	N1070	Hex(5)HexNAc(4)Fuc(1)	N-terminus
O75976	Carboxypeptidase D	N1070	Hex(5)HexNAc(4)Fuc(1)NeuAc(1)	N-terminus
O75976	Carboxypeptidase D	N1070	Hex(5)HexNAc(4)Fuc(1)NeuAc(2)	N-terminus
O75976	Carboxypeptidase D	N1070	Hex(5)HexNAc(5)Fuc(1)	N-terminus
O75976	Carboxypeptidase D	N1070	Hex(5)HexNAc(5)Fuc(1)NeuAc(1)	N-terminus
O75976	Carboxypeptidase D	N1070	Hex(5)HexNAc(5)Fuc(1)NeuAc(2)	N-terminus
O75976	Carboxypeptidase D	N1070	Hex(5)HexNAc(5)Fuc(2)	N-terminus
O75976	Carboxypeptidase D	N1070	Hex(5)HexNAc(5)Fuc(2)NeuAc(1)	N-terminus
O75976	Carboxypeptidase D	N1070	Hex(6)HexNAc(6)Fuc(1)	N-terminus
O95297	Myelin protein zero-like protein 1	N50	Hex(5)HexNAc(5)Fuc(1)NeuAc(1)	N-terminus
O95445	Apolipoprotein M	N135	Hex(4)HexNAc(6)	Extracellular
O95445	Apolipoprotein M	N135	Hex(5)HexNAc(4)	Extracellular
O95445	Apolipoprotein M	N135	Hex(7)HexNAc(2)	Extracellular
O95445	Apolipoprotein M	N135	Hex(9)HexNAc(2)	Extracellular
O95477	ATP-binding cassette sub-family A member 1	N1504	Hex(9)HexNAc(2)	Loop
O95477	ATP-binding cassette sub-family A member 1	N1637	Hex(4)HexNAc(6)	Loop
O95477	ATP-binding cassette sub-family A member 1	N1637	Hex(9)HexNAc(2)	Loop
O95502	Neuronal pentraxin receptor	N42	Hex(9)HexNAc(2)	C-terminus
O95502	Neuronal pentraxin receptor	N216	Hex(7)HexNAc(2)	C-terminus
O95857	Tetraspanin-13	N137	Hex(5)HexNAc(5)Fuc(1)NeuAc(1)	Loop
O95857	Tetraspanin-13	N137	Hex(5)HexNAc(5)Fuc(1)NeuAc(2)	Loop
O95857	Tetraspanin-13	N137	Hex(5)HexNAc(5)Fuc(2)NeuAc(1)	Loop
O95857	Tetraspanin-13	N137	Hex(6)HexNAc(6)Fuc(1)NeuAc(2)	Loop
O95857	Tetraspanin-13	N137	Hex(6)HexNAc(6)Fuc(1)NeuAc(3)	Loop
O96005	Cleft lip and palate transmembrane protein 1	N295	Hex(6)HexNAc(2)	Loop
O96005	Cleft lip and palate transmembrane protein 1	N295	Hex(7)HexNAc(2)	Loop
O96005	Cleft lip and palate transmembrane protein 1	N295	Hex(8)HexNAc(2)	Loop
O96005	Cleft lip and palate transmembrane protein 1	N295	Hex(9)HexNAc(2)	Loop
P00533	Epidermal growth factor receptor	N352	Hex(6)HexNAc(2)	N-terminus
P00533	Epidermal growth factor receptor	N352	Hex(7)HexNAc(2)	N-terminus
P00533	Epidermal growth factor receptor	N352	Hex(8)HexNAc(2)	N-terminus
P00533	Epidermal growth factor receptor	N361	Hex(7)HexNAc(2)	N-terminus
P00533	Epidermal growth factor receptor	N361	Hex(8)HexNAc(2)	N-terminus
P00533	Epidermal growth factor receptor	N361	Hex(9)HexNAc(2)	N-terminus
P00734	Prothrombin	N121	Hex(8)HexNAc(2)	Extracellular
P00734	Prothrombin	N121	Hex(9)HexNAc(2)	Extracellular
P00734	Prothrombin	N121	Hex(10)HexNAc(2)	Extracellular
P01892 / P10316	HLA class I histocompatibility antigen, A-2 / A-69 alpha chain	N110	Hex(3)HexNAc(5)Fuc(1)	N-terminus
P01892 / P10316	HLA class I histocompatibility antigen, A-2 / A-69 alpha chain	N110	Hex(4)HexNAc(5)Fuc(1)NeuAc(1)	N-terminus
P01892 / P10316	HLA class I histocompatibility antigen, A-2 / A-69 alpha chain	N110	Hex(5)HexNAc(5)Fuc(1)	N-terminus
P01892 / P10316	HLA class I histocompatibility antigen, A-2 / A-69 alpha chain	N110	Hex(5)HexNAc(5)Fuc(1)NeuAc(1)	N-terminus
P01892 / P10316	HLA class I histocompatibility antigen, A-2 / A-69 alpha chain	N110	Hex(5)HexNAc(5)Fuc(1)NeuAc(2)	N-terminus
P01892 / P10316	HLA class I histocompatibility antigen, A-2 / A-69 alpha chain	N110	Hex(5)HexNAc(5)Fuc(2)NeuAc(1)	N-terminus
P01892 / P10316	HLA class I histocompatibility antigen, A-2 / A-69 alpha chain	N110	Hex(5)HexNAc(5)NeuAc(1)	N-terminus
P01892 / P10316	HLA class I histocompatibility antigen, A-2 / A-69 alpha chain	N110	Hex(5)HexNAc(5)NeuAc(2)	N-terminus
P01892 / P10316	HLA class I histocompatibility antigen, A-2 / A-69 alpha chain	N110	Hex(6)HexNAc(2)	N-terminus
P01892 / P10316	HLA class I histocompatibility antigen, A-2 / A-69 alpha chain	N110	Hex(7)HexNAc(2)	N-terminus
P01892 / P10316	HLA class I histocompatibility antigen, A-2 / A-69 alpha chain	N110	Hex(8)HexNAc(2)	N-terminus
P01892 / P10316	HLA class I histocompatibility antigen, A-2 / A-69 alpha chain	N110	Hex(9)HexNAc(2)	N-terminus
P01892 / P10316	HLA class I histocompatibility antigen, A-2 / A-69 alpha chain	N110	Hex(10)HexNAc(2)	N-terminus
P02675	Fibrinogen beta chain	N394	Hex(9)HexNAc(2)	Extracellular
P02679	Fibrinogen gamma chain	N78	Hex(4)HexNAc(5)Fuc(1)	Extracellular
P02679	Fibrinogen gamma chain	N78	Hex(5)HexNAc(5)Fuc(1)	Extracellular
P02679	Fibrinogen gamma chain	N78	Hex(8)HexNAc(2)	Extracellular
P02679	Fibrinogen gamma chain	N78	Hex(9)HexNAc(2)	Extracellular
P02751	Fibronectin	N430	Hex(3)HexNAc(5)Fuc(1)	Extracellular
P02751	Fibronectin	N430	Hex(4)HexNAc(5)Fuc(1)	Extracellular
P02751	Fibronectin	N430	Hex(5)HexNAc(4)Fuc(1)NeuAc(1)	Extracellular
P02751	Fibronectin	N430	Hex(5)HexNAc(5)Fuc(1)	Extracellular
P02751	Fibronectin	N430	Hex(5)HexNAc(5)Fuc(1)NeuAc(1)	Extracellular
P02751	Fibronectin	N528	Hex(4)HexNAc(5)Fuc(1)	Extracellular
P02751	Fibronectin	N528	Hex(4)HexNAc(5)Fuc(1)NeuAc(1)	Extracellular
P02751	Fibronectin	N528	Hex(4)HexNAc(5)Fuc(2)	Extracellular
P02751	Fibronectin	N528	Hex(5)HexNAc(4)Fuc(1)NeuAc(1)	Extracellular
P02751	Fibronectin	N528	Hex(5)HexNAc(5)Fuc(1)	Extracellular
P02751	Fibronectin	N528	Hex(5)HexNAc(5)Fuc(1)NeuAc(1)	Extracellular
P02751	Fibronectin	N528	Hex(5)HexNAc(5)Fuc(2)	Extracellular
P02751	Fibronectin	N528	Hex(5)HexNAc(5)Fuc(3)	Extracellular
P02751	Fibronectin	N528	Hex(5)HexNAc(6)Fuc(1)	Extracellular
P02751	Fibronectin	N528	Hex(9)HexNAc(2)	Extracellular
P02751	Fibronectin	N542	Hex(4)HexNAc(5)Fuc(1)	Extracellular
P02751	Fibronectin	N1007	Hex(3)HexNAc(5)Fuc(1)	Extracellular
P02751	Fibronectin	N1007	Hex(4)HexNAc(5)Fuc(1)	Extracellular
P02751	Fibronectin	N1007	Hex(4)HexNAc(5)Fuc(2)	Extracellular
P02751	Fibronectin	N1007	Hex(5)HexNAc(4)Fuc(1)	Extracellular
P02751	Fibronectin	N1007	Hex(5)HexNAc(4)Fuc(1)NeuAc(1)	Extracellular
P02751	Fibronectin	N1007	Hex(5)HexNAc(5)Fuc(1)	Extracellular
P02751	Fibronectin	N1007	Hex(5)HexNAc(5)Fuc(1)NeuAc(1)	Extracellular
P02751	Fibronectin	N1007	Hex(5)HexNAc(5)Fuc(1)NeuAc(2)	Extracellular
P02751	Fibronectin	N1007	Hex(5)HexNAc(5)Fuc(2)	Extracellular
P02751	Fibronectin	N1007	Hex(5)HexNAc(5)Fuc(2)NeuAc(1)	Extracellular
P02751	Fibronectin	N1007	Hex(5)HexNAc(5)Fuc(4)	Extracellular
P02751	Fibronectin	N1007	Hex(6)HexNAc(4)Fuc(2)	Extracellular
P02751	Fibronectin	N1007	Hex(8)HexNAc(2)	Extracellular
P02751	Fibronectin	N1007	Hex(9)HexNAc(2)	Extracellular
P02771	Alpha-fetoprotein	N251	Hex(3)HexNAc(5)Fuc(1)	Extracellular
P02771	Alpha-fetoprotein	N251	Hex(4)HexNAc(5)Fuc(1)	Extracellular
P02771	Alpha-fetoprotein	N251	Hex(4)HexNAc(5)Fuc(1)NeuAc(1)	Extracellular
P02771	Alpha-fetoprotein	N251	Hex(5)HexNAc(4)Fuc(1)NeuAc(1)	Extracellular
P02771	Alpha-fetoprotein	N251	Hex(5)HexNAc(5)Fuc(1)	Extracellular
P02771	Alpha-fetoprotein	N251	Hex(5)HexNAc(5)Fuc(1)NeuAc(1)	Extracellular
P02771	Alpha-fetoprotein	N251	Hex(5)HexNAc(5)Fuc(1)NeuAc(2)	Extracellular
P02771	Alpha-fetoprotein	N251	Hex(5)HexNAc(5)Fuc(2)	Extracellular
P02771	Alpha-fetoprotein	N251	Hex(5)HexNAc(5)Fuc(2)NeuAc(1)	Extracellular
P02771	Alpha-fetoprotein	N251	Hex(5)HexNAc(5)Fuc(3)	Extracellular
P02771	Alpha-fetoprotein	N251	Hex(5)HexNAc(5)Fuc(3)NeuAc(1)	Extracellular
P02771	Alpha-fetoprotein	N251	Hex(6)HexNAc(5)Fuc(1)NeuAc(1)	Extracellular
P02771	Alpha-fetoprotein	N251	Hex(6)HexNAc(5)Fuc(2)	Extracellular
P02771	Alpha-fetoprotein	N251	Hex(6)HexNAc(5)Fuc(3)	Extracellular
P02771	Alpha-fetoprotein	N251	Hex(8)HexNAc(2)	Extracellular
P02771	Alpha-fetoprotein	N251	Hex(9)HexNAc(2)	Extracellular
P02771	Alpha-fetoprotein	N251	Hex(10)HexNAc(2)	Extracellular
P02786	Transferrin receptor protein 1	N251	Hex(3)HexNAc(4)Fuc(1)	C-terminus
P02786	Transferrin receptor protein 1	N251	Hex(4)HexNAc(5)Fuc(1)	C-terminus
P02786	Transferrin receptor protein 1	N251	Hex(4)HexNAc(5)Fuc(1)NeuAc(1)	C-terminus
P02786	Transferrin receptor protein 1	N251	Hex(5)HexNAc(4)Fuc(1)NeuAc(2)	C-terminus
P02786	Transferrin receptor protein 1	N251	Hex(5)HexNAc(4)Fuc(2)NeuAc(1)	C-terminus
P02786	Transferrin receptor protein 1	N251	Hex(5)HexNAc(5)Fuc(1)	C-terminus
P02786	Transferrin receptor protein 1	N251	Hex(5)HexNAc(5)Fuc(1)NeuAc(1)	C-terminus
P02786	Transferrin receptor protein 1	N251	Hex(5)HexNAc(5)Fuc(1)NeuAc(2)	C-terminus
P02786	Transferrin receptor protein 1	N251	Hex(5)HexNAc(5)Fuc(2)	C-terminus
P02786	Transferrin receptor protein 1	N251	Hex(5)HexNAc(5)Fuc(2)NeuAc(1)	C-terminus
P02786	Transferrin receptor protein 1	N251	Hex(5)HexNAc(5)Fuc(3)NeuAc(1)	C-terminus
P02786	Transferrin receptor protein 1	N251	Hex(6)HexNAc(5)Fuc(1)NeuAc(1)	C-terminus
P02786	Transferrin receptor protein 1	N251	Hex(6)HexNAc(5)Fuc(1)NeuAc(2)	C-terminus
P02786	Transferrin receptor protein 1	N251	Hex(6)HexNAc(5)Fuc(2)	C-terminus
P02786	Transferrin receptor protein 1	N251	Hex(6)HexNAc(5)Fuc(2)NeuAc(1)	C-terminus
P02786	Transferrin receptor protein 1	N251	Hex(6)HexNAc(5)Fuc(3)	C-terminus
P02786	Transferrin receptor protein 1	N251	Hex(6)HexNAc(5)Fuc(4)	C-terminus
P02786	Transferrin receptor protein 1	N251	Hex(6)HexNAc(5)NeuAc(2)	C-terminus
P02786	Transferrin receptor protein 1	N251	Hex(6)HexNAc(6)Fuc(1)	C-terminus
P02786	Transferrin receptor protein 1	N251	Hex(6)HexNAc(6)Fuc(1)NeuAc(1)	C-terminus
P02786	Transferrin receptor protein 1	N251	Hex(6)HexNAc(6)Fuc(1)NeuAc(2)	C-terminus
P02786	Transferrin receptor protein 1	N251	Hex(6)HexNAc(6)Fuc(1)NeuAc(3)	C-terminus
P02786	Transferrin receptor protein 1	N251	Hex(6)HexNAc(6)Fuc(2)	C-terminus
P02786	Transferrin receptor protein 1	N251	Hex(6)HexNAc(6)Fuc(2)NeuAc(1)	C-terminus
P02786	Transferrin receptor protein 1	N251	Hex(6)HexNAc(6)Fuc(2)NeuAc(2)	C-terminus
P02786	Transferrin receptor protein 1	N251	Hex(6)HexNAc(6)Fuc(3)NeuAc(1)	C-terminus
P02786	Transferrin receptor protein 1	N251	Hex(9)HexNAc(2)	C-terminus
P02786	Transferrin receptor protein 1	N727	Hex(7)HexNAc(2)	C-terminus
P02786	Transferrin receptor protein 1	N727	Hex(8)HexNAc(2)	C-terminus
P02786	Transferrin receptor protein 1	N727	Hex(9)HexNAc(2)	C-terminus
P04004	Vitronectin	N86	Hex(8)HexNAc(2)	Extracellular
P04004	Vitronectin	N86	Hex(9)HexNAc(2)	Extracellular
P04004	Vitronectin	N169	Hex(5)HexNAc(4)NeuAc(1)	Extracellular
P04004	Vitronectin	N169	Hex(6)HexNAc(3)NeuAc(1)	Extracellular
P04004	Vitronectin	N169	Hex(6)HexNAc(4)NeuAc(1)	Extracellular
P04004	Vitronectin	N169	Hex(8)HexNAc(2)	Extracellular
P04004	Vitronectin	N169	Hex(9)HexNAc(2)	Extracellular
P04004	Vitronectin	N169	Hex(10)HexNAc(2)	Extracellular
P04004	Vitronectin	N242	Hex(3)HexNAc(6)	Extracellular
P04004	Vitronectin	N242	Hex(4)HexNAc(5)Fuc(1)NeuAc(1)	Extracellular
P04004	Vitronectin	N242	Hex(4)HexNAc(5)Fuc(2)NeuAc(1)	Extracellular
P04004	Vitronectin	N242	Hex(5)HexNAc(5)Fuc(1)	Extracellular
P04004	Vitronectin	N242	Hex(5)HexNAc(5)Fuc(1)NeuAc(1)	Extracellular
P04004	Vitronectin	N242	Hex(5)HexNAc(5)Fuc(1)NeuAc(2)	Extracellular
P04004	Vitronectin	N242	Hex(5)HexNAc(5)Fuc(2)NeuAc(1)	Extracellular
P04004	Vitronectin	N242	Hex(5)HexNAc(5)Fuc(3)NeuAc(1)	Extracellular
P04004	Vitronectin	N242	Hex(6)HexNAc(2)	Extracellular
P04004	Vitronectin	N242	Hex(6)HexNAc(5)Fuc(1)NeuAc(1)	Extracellular
P04004	Vitronectin	N242	Hex(6)HexNAc(6)Fuc(1)NeuAc(1)	Extracellular
P04004	Vitronectin	N242	Hex(6)HexNAc(6)Fuc(2)NeuAc(1)	Extracellular
P04004	Vitronectin	N242	Hex(6)HexNAc(6)Fuc(3)NeuAc(1)	Extracellular
P04004	Vitronectin	N242	Hex(6)HexNAc(6)NeuAc(2)	Extracellular
P04004	Vitronectin	N242	Hex(7)HexNAc(2)	Extracellular
P04004	Vitronectin	N242	Hex(8)HexNAc(2)	Extracellular
P04004	Vitronectin	N242	Hex(9)HexNAc(2)	Extracellular
P04004	Vitronectin	N242	Hex(10)HexNAc(2)	Extracellular
P04114	Apolipoprotein B-100	N3465	Hex(9)HexNAc(2)	Extracellular
P04233	HLA class II histocompatibility antigen gamma chain	N270	Hex(9)HexNAc(2)	C-terminus
P04626	Receptor tyrosine-protein kinase erbB-2	N187	Hex(5)HexNAc(5)Fuc(1)NeuAc(1)	N-terminus
P04626	Receptor tyrosine-protein kinase erbB-2	N187	Hex(5)HexNAc(5)Fuc(1)NeuAc(2)	N-terminus
P04626	Receptor tyrosine-protein kinase erbB-2	N187	Hex(9)HexNAc(2)	N-terminus
P04626	Receptor tyrosine-protein kinase erbB-2	N530	Hex(5)HexNAc(5)	N-terminus
P04626	Receptor tyrosine-protein kinase erbB-2	N530	Hex(5)HexNAc(5)Fuc(1)NeuAc(1)	N-terminus
P04626	Receptor tyrosine-protein kinase erbB-2	N530	Hex(5)HexNAc(5)Fuc(1)NeuAc(2)	N-terminus
P04626	Receptor tyrosine-protein kinase erbB-2	N530	Hex(5)HexNAc(5)NeuAc(1)	N-terminus
P04626	Receptor tyrosine-protein kinase erbB-2	N530	Hex(5)HexNAc(5)NeuAc(2)	N-terminus
P04626	Receptor tyrosine-protein kinase erbB-2	N530	Hex(9)HexNAc(2)	N-terminus
P05362	Intercellular adhesion molecule 1	N267	Hex(5)HexNAc(5)Fuc(1)NeuAc(1)	N-terminus
P05556	Integrin beta-1	N50	Hex(7)HexNAc(2)	N-terminus
P05556	Integrin beta-1	N50	Hex(8)HexNAc(2)	N-terminus
P05556	Integrin beta-1	N50	Hex(9)HexNAc(2)	N-terminus
P05556	Integrin beta-1	N212	Hex(4)HexNAc(5)NeuAc(1)	N-terminus
P05556	Integrin beta-1	N212	Hex(5)HexNAc(2)	N-terminus
P05556	Integrin beta-1	N212	Hex(5)HexNAc(5)Fuc(1)	N-terminus
P05556	Integrin beta-1	N212	Hex(5)HexNAc(5)Fuc(1)NeuAc(1)	N-terminus
P05556	Integrin beta-1	N212	Hex(5)HexNAc(5)Fuc(2)	N-terminus
P05556	Integrin beta-1	N212	Hex(6)HexNAc(4)	N-terminus
P05556	Integrin beta-1	N212	Hex(6)HexNAc(6)Fuc(1)	N-terminus
P05556	Integrin beta-1	N212	Hex(6)HexNAc(6)Fuc(2)	N-terminus
P05556	Integrin beta-1	N212	Hex(7)HexNAc(2)	N-terminus
P05556	Integrin beta-1	N212	Hex(8)HexNAc(2)	N-terminus
P05556	Integrin beta-1	N212	Hex(9)HexNAc(2)	N-terminus
P05556	Integrin beta-1	N212	Hex(10)HexNAc(2)	N-terminus
P05556	Integrin beta-1	N406	Hex(6)HexNAc(6)Fuc(1)NeuAc(1)	N-terminus
P05556	Integrin beta-1	N406	Hex(6)HexNAc(2)	N-terminus
P05556	Integrin beta-1	N406	Hex(8)HexNAc(2)	N-terminus
P05556	Integrin beta-1	N406	Hex(9)HexNAc(2)	N-terminus
P05556	Integrin beta-1	N406	Hex(10)HexNAc(2)	N-terminus
P05556	Integrin beta-1	N481	Hex(6)HexNAc(2)	N-terminus
P05556	Integrin beta-1	N481	Hex(7)HexNAc(2)	N-terminus
P05556	Integrin beta-1	N481	Hex(8)HexNAc(2)	N-terminus
P05556	Integrin beta-1	N481	Hex(9)HexNAc(2)	N-terminus
P05556	Integrin beta-1	N481	Hex(10)HexNAc(2)	N-terminus
P05556	Integrin beta-1	N520	Hex(5)HexNAc(2)	N-terminus
P05556	Integrin beta-1	N520	Hex(6)HexNAc(2)	N-terminus
P05556	Integrin beta-1	N520	Hex(7)HexNAc(2)	N-terminus
P05556	Integrin beta-1	N520	Hex(8)HexNAc(2)	N-terminus
P05556	Integrin beta-1	N520	Hex(9)HexNAc(2)	N-terminus
P05556	Integrin beta-1	N669	Hex(6)HexNAc(2)	N-terminus
P05556	Integrin beta-1	N669	Hex(7)HexNAc(2)	N-terminus
P05556	Integrin beta-1	N669	Hex(7)HexNAc(6)Fuc(2)	N-terminus
P05556	Integrin beta-1	N669	Hex(8)HexNAc(2)	N-terminus
P05556	Integrin beta-1	N669	Hex(9)HexNAc(2)	N-terminus
P06213	Insulin receptor	N43	Hex(5)HexNAc(4)Fuc(1)	N-terminus
P06213	Insulin receptor	N43	Hex(9)HexNAc(2)	N-terminus
P06213	Insulin receptor	N138	Hex(9)HexNAc(2)	N-terminus
P06213	Insulin receptor	N242	Hex(4)HexNAc(6)	N-terminus
P06213	Insulin receptor	N242	Hex(6)HexNAc(2)	N-terminus
P06213	Insulin receptor	N242	Hex(6)HexNAc(3)Fuc(1)	N-terminus
P06213	Insulin receptor	N242	Hex(7)HexNAc(2)	N-terminus
P06213	Insulin receptor	N242	Hex(8)HexNAc(2)	N-terminus
P06213	Insulin receptor	N242	Hex(9)HexNAc(2)	N-terminus
P06213	Insulin receptor	N282	Hex(5)HexNAc(5)Fuc(1)	N-terminus
P06213	Insulin receptor	N282	Hex(5)HexNAc(5)Fuc(1)NeuAc(1)	N-terminus
P06213	Insulin receptor	N424	Hex(5)HexNAc(5)Fuc(1)NeuAc(1)	N-terminus
P06213	Insulin receptor	N445	Hex(5)HexNAc(5)Fuc(1)	N-terminus
P06213	Insulin receptor	N445	Hex(5)HexNAc(5)Fuc(1)NeuAc(1)	N-terminus
P06213	Insulin receptor	N445	Hex(6)HexNAc(6)Fuc(1)	N-terminus
P06213	Insulin receptor	N445	Hex(6)HexNAc(6)Fuc(1)NeuAc(1)	N-terminus
P06213	Insulin receptor	N445	Hex(9)HexNAc(2)	N-terminus
P06213	Insulin receptor	N920	Hex(4)HexNAc(3)Fuc(1)NeuAc(1)	N-terminus
P06213	Insulin receptor	N920	Hex(7)HexNAc(2)	N-terminus
P06213	Insulin receptor	N920	Hex(8)HexNAc(2)	N-terminus
P06213	Insulin receptor	N920	Hex(9)HexNAc(2)	N-terminus
P06731	Carcinoembryonic antigen-related cell adhesion molecule 5	N204	Hex(5)HexNAc(5)Fuc(1)	Extracellular
P06731	Carcinoembryonic antigen-related cell adhesion molecule 5	N208	Hex(5)HexNAc(5)Fuc(1)	Extracellular
P06731	Carcinoembryonic antigen-related cell adhesion molecule 5	N480	Hex(5)HexNAc(5)Fuc(1)NeuAc(1)	Extracellular
P06731	Carcinoembryonic antigen-related cell adhesion molecule 5	N508	Hex(8)HexNAc(2)	Extracellular
P06731	Carcinoembryonic antigen-related cell adhesion molecule 5	N560	Hex(5)HexNAc(5)Fuc(1)NeuAc(1)	Extracellular
P06731	Carcinoembryonic antigen-related cell adhesion molecule 5	N580	Hex(5)HexNAc(5)Fuc(1)NeuAc(1)	Extracellular
P06731	Carcinoembryonic antigen-related cell adhesion molecule 5	N650	Hex(4)HexNAc(3)NeuAc(1)	Extracellular
P06731	Carcinoembryonic antigen-related cell adhesion molecule 5	N650	Hex(5)HexNAc(2)	Extracellular
P06731	Carcinoembryonic antigen-related cell adhesion molecule 5	N650	Hex(5)HexNAc(4)Fuc(1)	Extracellular
P06731	Carcinoembryonic antigen-related cell adhesion molecule 5	N650	Hex(5)HexNAc(4)Fuc(1)NeuAc(2)	Extracellular
P06731	Carcinoembryonic antigen-related cell adhesion molecule 5	N650	Hex(5)HexNAc(4)NeuAc(2)	Extracellular
P06731	Carcinoembryonic antigen-related cell adhesion molecule 5	N650	Hex(5)HexNAc(5)Fuc(1)	Extracellular
P06731	Carcinoembryonic antigen-related cell adhesion molecule 5	N650	Hex(5)HexNAc(5)Fuc(3)	Extracellular
P06731	Carcinoembryonic antigen-related cell adhesion molecule 5	N650	Hex(6)HexNAc(2)	Extracellular
P06731	Carcinoembryonic antigen-related cell adhesion molecule 5	N650	Hex(6)HexNAc(3)Fuc(1)NeuAc(1)	Extracellular
P06731	Carcinoembryonic antigen-related cell adhesion molecule 5	N650	Hex(6)HexNAc(3)Fuc(2)	Extracellular
P06731	Carcinoembryonic antigen-related cell adhesion molecule 5	N650	Hex(6)HexNAc(3)NeuAc(1)	Extracellular
P06731	Carcinoembryonic antigen-related cell adhesion molecule 5	N650	Hex(6)HexNAc(4)NeuAc(1)	Extracellular
P06731	Carcinoembryonic antigen-related cell adhesion molecule 5	N650	Hex(6)HexNAc(5)Fuc(1)NeuAc(1)	Extracellular
P06731	Carcinoembryonic antigen-related cell adhesion molecule 5	N650	Hex(6)HexNAc(6)Fuc(1)	Extracellular
P06731	Carcinoembryonic antigen-related cell adhesion molecule 5	N650	Hex(6)HexNAc(6)Fuc(1)NeuAc(1)	Extracellular
P06731	Carcinoembryonic antigen-related cell adhesion molecule 5	N650	Hex(6)HexNAc(6)Fuc(2)	Extracellular
P06731	Carcinoembryonic antigen-related cell adhesion molecule 5	N650	Hex(6)HexNAc(6)NeuAc(1)	Extracellular
P06731	Carcinoembryonic antigen-related cell adhesion molecule 5	N665	Hex(4)HexNAc(5)Fuc(1)	Extracellular
P06731	Carcinoembryonic antigen-related cell adhesion molecule 5	N665	Hex(5)HexNAc(5)Fuc(1)	Extracellular
P06731	Carcinoembryonic antigen-related cell adhesion molecule 5	N665	Hex(5)HexNAc(5)Fuc(1)NeuAc(1)	Extracellular
P06731	Carcinoembryonic antigen-related cell adhesion molecule 5	N665	Hex(5)HexNAc(5)Fuc(1)NeuAc(2)	Extracellular
P06731	Carcinoembryonic antigen-related cell adhesion molecule 5	N665	Hex(5)HexNAc(5)Fuc(2)	Extracellular
P06731	Carcinoembryonic antigen-related cell adhesion molecule 5	N665	Hex(5)HexNAc(5)Fuc(2)NeuAc(1)	Extracellular
P06731	Carcinoembryonic antigen-related cell adhesion molecule 5	N665	Hex(5)HexNAc(5)NeuAc(1)	Extracellular
P06756	Integrin alpha-V	N74	Hex(3)HexNAc(5)Fuc(1)	N-terminus
P06756	Integrin alpha-V	N74	Hex(4)HexNAc(3)Fuc(1)NeuAc(1)	N-terminus
P06756	Integrin alpha-V	N74	Hex(4)HexNAc(4)Fuc(1)	N-terminus
P06756	Integrin alpha-V	N74	Hex(4)HexNAc(5)Fuc(1)	N-terminus
P06756	Integrin alpha-V	N74	Hex(4)HexNAc(5)Fuc(1)NeuAc(1)	N-terminus
P06756	Integrin alpha-V	N74	Hex(5)HexNAc(2)	N-terminus
P06756	Integrin alpha-V	N74	Hex(5)HexNAc(3)Fuc(1)	N-terminus
P06756	Integrin alpha-V	N74	Hex(5)HexNAc(4)	N-terminus
P06756	Integrin alpha-V	N74	Hex(5)HexNAc(4)Fuc(1)	N-terminus
P06756	Integrin alpha-V	N74	Hex(5)HexNAc(5)Fuc(1)	N-terminus
P06756	Integrin alpha-V	N74	Hex(6)HexNAc(4)	N-terminus
P06756	Integrin alpha-V	N74	Hex(6)HexNAc(4)Fuc(1)	N-terminus
P06756	Integrin alpha-V	N74	Hex(7)HexNAc(2)	N-terminus
P06756	Integrin alpha-V	N74	Hex(8)HexNAc(2)	N-terminus
P06756	Integrin alpha-V	N74	Hex(10)HexNAc(2)	N-terminus
P06756	Integrin alpha-V	N554	Hex(9)HexNAc(2)	N-terminus
P06756	Integrin alpha-V	N615	Hex(4)HexNAc(6)	N-terminus
P06756	Integrin alpha-V	N615	Hex(7)HexNAc(2)	N-terminus
P06756	Integrin alpha-V	N615	Hex(8)HexNAc(2)	N-terminus
P06756	Integrin alpha-V	N615	Hex(9)HexNAc(2)	N-terminus
P06756	Integrin alpha-V	N874	Hex(8)HexNAc(2)	N-terminus
P06756	Integrin alpha-V	N945	Hex(7)HexNAc(2)	N-terminus
P06756	Integrin alpha-V	N945	Hex(8)HexNAc(2)	N-terminus
P06756	Integrin alpha-V	N945	Hex(9)HexNAc(2)	N-terminus
P07306	Asialoglycoprotein receptor 1	N79	Hex(7)HexNAc(2)	C-terminus
P07306	Asialoglycoprotein receptor 1	N79	Hex(7)HexNAc(6)Fuc(1)	C-terminus
P07306	Asialoglycoprotein receptor 1	N79	Hex(8)HexNAc(2)	C-terminus
P07602	Prosaposin	N80	Hex(4)HexNAc(4)Fuc(2)NeuAc(1)	Extracellular
P07602	Prosaposin	N80	Hex(8)HexNAc(2)	Extracellular
P07602	Prosaposin	N80	Hex(9)HexNAc(2)	Extracellular
P07602	Prosaposin	N80	Hex(10)HexNAc(2)	Extracellular
P07602	Prosaposin	N101	Hex(4)HexNAc(4)Fuc(1)	Extracellular
P07602	Prosaposin	N101	Hex(5)HexNAc(5)Fuc(1)	Extracellular
P07602	Prosaposin	N101	Hex(5)HexNAc(5)Fuc(1)NeuAc(1)	Extracellular
P07602	Prosaposin	N101	Hex(8)HexNAc(2)	Extracellular
P07602	Prosaposin	N215	Hex(3)HexNAc(4)Fuc(1)	Extracellular
P07602	Prosaposin	N215	Hex(3)HexNAc(5)Fuc(1)	Extracellular
P07602	Prosaposin	N215	Hex(4)HexNAc(5)Fuc(1)	Extracellular
P07602	Prosaposin	N215	Hex(4)HexNAc(5)Fuc(1)NeuAc(1)	Extracellular
P07602	Prosaposin	N215	Hex(4)HexNAc(5)NeuAc(1)	Extracellular
P07602	Prosaposin	N215	Hex(4)HexNAc(6)	Extracellular
P07602	Prosaposin	N215	Hex(5)HexNAc(4)Fuc(1)NeuAc(1)	Extracellular
P07602	Prosaposin	N215	Hex(5)HexNAc(4)Fuc(1)NeuAc(2)	Extracellular
P07602	Prosaposin	N215	Hex(5)HexNAc(4)Fuc(2)NeuAc(1)	Extracellular
P07602	Prosaposin	N215	Hex(5)HexNAc(5)Fuc(1)	Extracellular
P07602	Prosaposin	N215	Hex(5)HexNAc(5)Fuc(1)NeuAc(1)	Extracellular
P07602	Prosaposin	N215	Hex(5)HexNAc(5)Fuc(1)NeuAc(2)	Extracellular
P07602	Prosaposin	N215	Hex(5)HexNAc(5)Fuc(2)	Extracellular
P07602	Prosaposin	N215	Hex(5)HexNAc(5)Fuc(2)NeuAc(1)	Extracellular
P07602	Prosaposin	N215	Hex(6)HexNAc(5)Fuc(3)NeuAc(2)	Extracellular
P07602	Prosaposin	N215	Hex(6)HexNAc(6)Fuc(1)NeuAc(1)	Extracellular
P07602	Prosaposin	N215	Hex(6)HexNAc(6)Fuc(2)NeuAc(1)	Extracellular
P07602	Prosaposin	N215	Hex(7)HexNAc(6)Fuc(2)NeuAc(1)	Extracellular
P07602	Prosaposin	N215	Hex(8)HexNAc(2)	Extracellular
P07602	Prosaposin	N215	Hex(9)HexNAc(2)	Extracellular
P07602	Prosaposin	N332	Hex(6)HexNAc(2)	Extracellular
P07602	Prosaposin	N332	Hex(7)HexNAc(2)	Extracellular
P07602	Prosaposin	N332	Hex(7)HexNAc(6)NeuAc(2)	Extracellular
P07602	Prosaposin	N332	Hex(8)HexNAc(2)	Extracellular
P07602	Prosaposin	N332	Hex(9)HexNAc(2)	Extracellular
P07602	Prosaposin	N426	Hex(8)HexNAc(2)	Extracellular
P07602	Prosaposin	N426	Hex(9)HexNAc(2)	Extracellular
P07942	Laminin subunit beta-1	N677	Hex(9)HexNAc(2)	Extracellular
P07942	Laminin subunit beta-1	N1041	Hex(5)HexNAc(2)	Extracellular
P07942	Laminin subunit beta-1	N1279	Hex(8)HexNAc(2)	Extracellular
P08174	Complement decay-accelerating factor	N95	Hex(4)HexNAc(5)NeuAc(1)	Extracellular
P08174	Complement decay-accelerating factor	N95	Hex(5)HexNAc(5)Fuc(1)NeuAc(1)	Extracellular
P08174	Complement decay-accelerating factor	N95	Hex(5)HexNAc(5)NeuAc(1)	Extracellular
P08174	Complement decay-accelerating factor	N95	Hex(5)HexNAc(5)NeuAc(2)	Extracellular
P08195	4F2 cell-surface antigen heavy chain	N365	Hex(4)HexNAc(3)Fuc(1)NeuAc(1)	C-terminus
P08195	4F2 cell-surface antigen heavy chain	N365	Hex(5)HexNAc(4)Fuc(1)NeuAc(1)	C-terminus
P08195	4F2 cell-surface antigen heavy chain	N365	Hex(5)HexNAc(4)Fuc(1)NeuAc(2)	C-terminus
P08195	4F2 cell-surface antigen heavy chain	N365	Hex(5)HexNAc(5)Fuc(1)NeuAc(1)	C-terminus
P08195	4F2 cell-surface antigen heavy chain	N365	Hex(5)HexNAc(5)Fuc(1)NeuAc(2)	C-terminus
P08195	4F2 cell-surface antigen heavy chain	N365	Hex(6)HexNAc(5)Fuc(1)NeuAc(2)	C-terminus
P08195	4F2 cell-surface antigen heavy chain	N365	Hex(6)HexNAc(5)Fuc(1)NeuAc(3)	C-terminus
P08195	4F2 cell-surface antigen heavy chain	N365	Hex(6)HexNAc(5)Fuc(2)NeuAc(1)	C-terminus
P08195	4F2 cell-surface antigen heavy chain	N365	Hex(6)HexNAc(5)Fuc(2)NeuAc(2)	C-terminus
P08195	4F2 cell-surface antigen heavy chain	N365	Hex(6)HexNAc(5)Fuc(3)NeuAc(1)	C-terminus
P08195	4F2 cell-surface antigen heavy chain	N365	Hex(6)HexNAc(6)Fuc(1)NeuAc(1)	C-terminus
P08195	4F2 cell-surface antigen heavy chain	N365	Hex(6)HexNAc(6)Fuc(1)NeuAc(2)	C-terminus
P08195	4F2 cell-surface antigen heavy chain	N365	Hex(6)HexNAc(6)Fuc(1)NeuAc(3)	C-terminus
P08195	4F2 cell-surface antigen heavy chain	N365	Hex(6)HexNAc(6)Fuc(2)NeuAc(1)	C-terminus
P08195	4F2 cell-surface antigen heavy chain	N365	Hex(6)HexNAc(6)Fuc(2)NeuAc(2)	C-terminus
P08195	4F2 cell-surface antigen heavy chain	N365	Hex(6)HexNAc(6)Fuc(3)NeuAc(1)	C-terminus
P08195	4F2 cell-surface antigen heavy chain	N365	Hex(7)HexNAc(5)Fuc(2)NeuAc(2)	C-terminus
P08195	4F2 cell-surface antigen heavy chain	N365	Hex(7)HexNAc(6)Fuc(2)NeuAc(2)	C-terminus
P08195	4F2 cell-surface antigen heavy chain	N365	Hex(9)HexNAc(2)	C-terminus
P08195	4F2 cell-surface antigen heavy chain	N365	Hex(8)HexNAc(2)	C-terminus
P08195	4F2 cell-surface antigen heavy chain	N365	Hex(10)HexNAc(2)	C-terminus
P08582	Melanotransferrin	N135	Hex(6)HexNAc(2)	Extracellular
P08582	Melanotransferrin	N135	Hex(7)HexNAc(2)	Extracellular
P08582	Melanotransferrin	N135	Hex(8)HexNAc(2)	Extracellular
P08582	Melanotransferrin	N135	Hex(9)HexNAc(2)	Extracellular
P08582	Melanotransferrin	N515	Hex(4)HexNAc(5)Fuc(1)	Extracellular
P08582	Melanotransferrin	N515	Hex(5)HexNAc(5)Fuc(1)	Extracellular
P08648	Integrin alpha-5	N868	Hex(5)HexNAc(5)Fuc(2)NeuAc(1)	N-terminus
P08962	CD63 antigen	N130	Hex(4)HexNAc(3)Fuc(1)NeuAc(1)	Loop
P08962	CD63 antigen	N130	Hex(5)HexNAc(3)Fuc(1)NeuAc(1)	Loop
P08962	CD63 antigen	N130	Hex(5)HexNAc(4)Fuc(1)NeuAc(1)	Loop
P08962	CD63 antigen	N130	Hex(5)HexNAc(4)Fuc(1)NeuAc(2)	Loop
P08962	CD63 antigen	N130	Hex(5)HexNAc(5)Fuc(1)	Loop
P08962	CD63 antigen	N130	Hex(5)HexNAc(5)Fuc(1)NeuAc(1)	Loop
P08962	CD63 antigen	N130	Hex(5)HexNAc(5)Fuc(1)NeuAc(2)	Loop
P08962	CD63 antigen	N130	Hex(5)HexNAc(5)Fuc(2)	Loop
P08962	CD63 antigen	N130	Hex(5)HexNAc(5)Fuc(2)NeuAc(1)	Loop
P08962	CD63 antigen	N130	Hex(5)HexNAc(7)Fuc(4)NeuAc(2)	Loop
P08962	CD63 antigen	N130	Hex(6)HexNAc(3)NeuAc(1)	Loop
P08962	CD63 antigen	N130	Hex(6)HexNAc(5)Fuc(1)NeuAc(1)	Loop
P08962	CD63 antigen	N130	Hex(6)HexNAc(5)Fuc(1)NeuAc(2)	Loop
P08962	CD63 antigen	N130	Hex(6)HexNAc(5)Fuc(1)NeuAc(3)	Loop
P08962	CD63 antigen	N130	Hex(6)HexNAc(5)Fuc(2)NeuAc(2)	Loop
P08962	CD63 antigen	N130	Hex(6)HexNAc(5)Fuc(3)NeuAc(2)	Loop
P08962	CD63 antigen	N130	Hex(6)HexNAc(6)Fuc(1)NeuAc(1)	Loop
P08962	CD63 antigen	N130	Hex(6)HexNAc(6)Fuc(1)NeuAc(2)	Loop
P08962	CD63 antigen	N130	Hex(6)HexNAc(6)Fuc(1)NeuAc(3)	Loop
P08962	CD63 antigen	N130	Hex(6)HexNAc(6)Fuc(2)NeuAc(1)	Loop
P08962	CD63 antigen	N130	Hex(6)HexNAc(6)Fuc(2)NeuAc(2)	Loop
P08962	CD63 antigen	N130	Hex(6)HexNAc(6)Fuc(3)NeuAc(2)	Loop
P08962	CD63 antigen	N130	Hex(6)HexNAc(6)Fuc(5)NeuAc(2)	Loop
P08962	CD63 antigen	N130	Hex(6)HexNAc(6)NeuAc(2)	Loop
P08962	CD63 antigen	N130	Hex(6)HexNAc(7)Fuc(3)NeuAc(1)	Loop
P08962	CD63 antigen	N130	Hex(7)HexNAc(2)	Loop
P08962	CD63 antigen	N130	Hex(7)HexNAc(6)Fuc(2)NeuAc(1)	Loop
P08962	CD63 antigen	N130	Hex(7)HexNAc(7)Fuc(4)NeuAc(1)	Loop
P08962	CD63 antigen	N130	Hex(8)HexNAc(2)	Loop
P08962	CD63 antigen	N130	Hex(9)HexNAc(2)	Loop
P08962	CD63 antigen	N130	Hex(10)HexNAc(2)	Loop
P09681	Gastric inhibitory polypeptide	N90	Hex(4)HexNAc(3)Fuc(2)	Extracellular
P09681	Gastric inhibitory polypeptide	N90	Hex(4)HexNAc(4)Fuc(1)NeuAc(1)	Extracellular
P09681	Gastric inhibitory polypeptide	N90	Hex(4)HexNAc(5)NeuAc(1)	Extracellular
P09681	Gastric inhibitory polypeptide	N90	Hex(5)HexNAc(3)	Extracellular
P09681	Gastric inhibitory polypeptide	N90	Hex(5)HexNAc(3)Fuc(1)	Extracellular
P09681	Gastric inhibitory polypeptide	N90	Hex(5)HexNAc(3)Fuc(1)NeuAc(1)	Extracellular
P09681	Gastric inhibitory polypeptide	N90	Hex(5)HexNAc(3)Fuc(2)	Extracellular
P09681	Gastric inhibitory polypeptide	N90	Hex(5)HexNAc(3)Fuc(2)NeuAc(1)	Extracellular
P09681	Gastric inhibitory polypeptide	N90	Hex(5)HexNAc(3)NeuAc(1)	Extracellular
P09681	Gastric inhibitory polypeptide	N90	Hex(5)HexNAc(4)Fuc(1)	Extracellular
P09681	Gastric inhibitory polypeptide	N90	Hex(5)HexNAc(4)Fuc(1)NeuAc(1)	Extracellular
P09681	Gastric inhibitory polypeptide	N90	Hex(5)HexNAc(4)NeuAc(1)	Extracellular
P09681	Gastric inhibitory polypeptide	N90	Hex(5)HexNAc(5)Fuc(1)NeuAc(1)	Extracellular
P09681	Gastric inhibitory polypeptide	N90	Hex(6)HexNAc(3)	Extracellular
P09681	Gastric inhibitory polypeptide	N90	Hex(6)HexNAc(3)Fuc(1)	Extracellular
P09681	Gastric inhibitory polypeptide	N90	Hex(6)HexNAc(3)Fuc(1)NeuAc(1)	Extracellular
P09681	Gastric inhibitory polypeptide	N90	Hex(6)HexNAc(4)Fuc(1)	Extracellular
P09681	Gastric inhibitory polypeptide	N90	Hex(6)HexNAc(4)Fuc(1)NeuAc(1)	Extracellular
P09681	Gastric inhibitory polypeptide	N90	Hex(7)HexNAc(2)	Extracellular
P09681	Gastric inhibitory polypeptide	N90	Hex(7)HexNAc(4)Fuc(1)	Extracellular
P09681	Gastric inhibitory polypeptide	N90	Hex(7)HexNAc(4)Fuc(1)NeuAc(1)	Extracellular
P09681	Gastric inhibitory polypeptide	N90	Hex(7)HexNAc(4)NeuAc(1)	Extracellular
P09681	Gastric inhibitory polypeptide	N90	Hex(8)HexNAc(2)	Extracellular
P09681	Gastric inhibitory polypeptide	N90	Hex(10)HexNAc(2)	Extracellular
P10321 or P30450 or Q29865	HLA class I histocompatibility antigen, Cw-7 or A-26 or Cw-18 alpha chain	N110	Hex(7)HexNAc(2)	N-terminus
P10321 or P30450 or Q29865	HLA class I histocompatibility antigen, Cw-7 or A-26 or Cw-18 alpha chain	N110	Hex(8)HexNAc(2)	N-terminus
P10321 or P30450 or Q29865	HLA class I histocompatibility antigen, Cw-7 or A-26 or Cw-18 alpha chain	N110	Hex(9)HexNAc(2)	N-terminus
P10321 or P30450 or Q29865	HLA class I histocompatibility antigen, Cw-7 or A-26 or Cw-18 alpha chain	N110	Hex(10)HexNAc(2)	N-terminus
P10586	Receptor-type tyrosine-protein phosphatase F	N721	Hex(5)HexNAc(5)Fuc(1)	N-terminus
P10586	Receptor-type tyrosine-protein phosphatase F	N721	Hex(5)HexNAc(5)Fuc(1)NeuAc(1)	N-terminus
P10586	Receptor-type tyrosine-protein phosphatase F	N966	Hex(5)HexNAc(5)Fuc(1)	N-terminus
P10586	Receptor-type tyrosine-protein phosphatase F	N966	Hex(5)HexNAc(5)Fuc(1)NeuAc(1)	N-terminus
P10586	Receptor-type tyrosine-protein phosphatase F	N966	Hex(5)HexNAc(5)Fuc(1)NeuAc(2)	N-terminus
P10586	Receptor-type tyrosine-protein phosphatase F	N966	Hex(5)HexNAc(5)Fuc(2)NeuAc(1)	N-terminus
P10721	Mast/stem cell growth factor receptor Kit	N486	Hex(8)HexNAc(2)	N-terminus
P10909	Clusterin	N291	Hex(6)HexNAc(2)	Extracellular
P10909	Clusterin	N291	Hex(7)HexNAc(2)	Extracellular
P10909	Clusterin	N291	Hex(8)HexNAc(2)	Extracellular
P10909	Clusterin	N291	Hex(9)HexNAc(2)	Extracellular
P10909	Clusterin	N291	Hex(10)HexNAc(2)	Extracellular
P10909	Clusterin	N374	Hex(8)HexNAc(2)	Extracellular
P11047	Laminin subunit gamma-1	N650	Hex(8)HexNAc(2)	Extracellular
P11047	Laminin subunit gamma-1	N650	Hex(9)HexNAc(2)	Extracellular
P11047	Laminin subunit gamma-1	N1107	Hex(4)HexNAc(5)Fuc(1)	Extracellular
P11047	Laminin subunit gamma-1	N1107	Hex(8)HexNAc(2)	Extracellular
P11047	Laminin subunit gamma-1	N1107	Hex(9)HexNAc(2)	Extracellular
P11047	Laminin subunit gamma-1	N1205	Hex(7)HexNAc(2)	Extracellular
P11047	Laminin subunit gamma-1	N1205	Hex(8)HexNAc(2)	Extracellular
P11047	Laminin subunit gamma-1	N1205	Hex(9)HexNAc(2)	Extracellular
P11047	Laminin subunit gamma-1	N1223	Hex(7)HexNAc(6)Fuc(2)NeuAc(1)	Extracellular
P11047	Laminin subunit gamma-1	N1223	Hex(8)HexNAc(2)	Extracellular
P11047	Laminin subunit gamma-1	N1241	Hex(4)HexNAc(5)Fuc(1)	Extracellular
P11047	Laminin subunit gamma-1	N1241	Hex(8)HexNAc(2)	Extracellular
P11047	Laminin subunit gamma-1	N1395	Hex(8)HexNAc(2)	Extracellular
P11279	Lysosome-associated membrane glycoprotein 1	N76	Hex(6)HexNAc(4)NeuAc(1)	N-terminus
P11279	Lysosome-associated membrane glycoprotein 1	N84	Hex(3)HexNAc(2)Fuc(1)	N-terminus
P11279	Lysosome-associated membrane glycoprotein 1	N84	Hex(3)HexNAc(4)Fuc(1)	N-terminus
P11279	Lysosome-associated membrane glycoprotein 1	N84	Hex(3)HexNAc(5)Fuc(1)	N-terminus
P11279	Lysosome-associated membrane glycoprotein 1	N84	Hex(4)HexNAc(3)Fuc(1)	N-terminus
P11279	Lysosome-associated membrane glycoprotein 1	N84	Hex(4)HexNAc(3)Fuc(1)NeuAc(1)	N-terminus
P11279	Lysosome-associated membrane glycoprotein 1	N84	Hex(4)HexNAc(4)Fuc(1)	N-terminus
P11279	Lysosome-associated membrane glycoprotein 1	N84	Hex(4)HexNAc(4)Fuc(1)NeuAc(1)	N-terminus
P11279	Lysosome-associated membrane glycoprotein 1	N84	Hex(4)HexNAc(4)NeuAc(1)	N-terminus
P11279	Lysosome-associated membrane glycoprotein 1	N84	Hex(4)HexNAc(5)Fuc(1)	N-terminus
P11279	Lysosome-associated membrane glycoprotein 1	N84	Hex(4)HexNAc(5)Fuc(1)NeuAc(1)	N-terminus
P11279	Lysosome-associated membrane glycoprotein 1	N84	Hex(5)HexNAc(3)NeuAc(1)	N-terminus
P11279	Lysosome-associated membrane glycoprotein 1	N84	Hex(5)HexNAc(4)Fuc(1)	N-terminus
P11279	Lysosome-associated membrane glycoprotein 1	N84	Hex(5)HexNAc(4)Fuc(1)NeuAc(1)	N-terminus
P11279	Lysosome-associated membrane glycoprotein 1	N84	Hex(5)HexNAc(4)Fuc(3)	N-terminus
P11279	Lysosome-associated membrane glycoprotein 1	N84	Hex(5)HexNAc(5)Fuc(1)	N-terminus
P11279	Lysosome-associated membrane glycoprotein 1	N84	Hex(5)HexNAc(5)Fuc(1)NeuAc(1)	N-terminus
P11279	Lysosome-associated membrane glycoprotein 1	N84	Hex(5)HexNAc(5)Fuc(1)NeuAc(2)	N-terminus
P11279	Lysosome-associated membrane glycoprotein 1	N84	Hex(5)HexNAc(5)Fuc(2)NeuAc(1)	N-terminus
P11279	Lysosome-associated membrane glycoprotein 1	N84	Hex(5)HexNAc(5)Fuc(3)NeuAc(1)	N-terminus
P11279	Lysosome-associated membrane glycoprotein 1	N84	Hex(5)HexNAc(5)Fuc(4)NeuAc(1)	N-terminus
P11279	Lysosome-associated membrane glycoprotein 1	N84	Hex(5)HexNAc(5)NeuAc(1)	N-terminus
P11279	Lysosome-associated membrane glycoprotein 1	N84	Hex(5)HexNAc(6)Fuc(1)	N-terminus
P11279	Lysosome-associated membrane glycoprotein 1	N84	Hex(5)HexNAc(6)Fuc(1)NeuAc(1)	N-terminus
P11279	Lysosome-associated membrane glycoprotein 1	N84	Hex(5)HexNAc(6)Fuc(1)NeuAc(2)	N-terminus
P11279	Lysosome-associated membrane glycoprotein 1	N84	Hex(5)HexNAc(6)Fuc(3)	N-terminus
P11279	Lysosome-associated membrane glycoprotein 1	N84	Hex(5)HexNAc(6)Fuc(3)NeuAc(1)	N-terminus
P11279	Lysosome-associated membrane glycoprotein 1	N84	Hex(5)HexNAc(6)NeuAc(1)	N-terminus
P11279	Lysosome-associated membrane glycoprotein 1	N84	Hex(6)HexNAc(4)Fuc(1)	N-terminus
P11279	Lysosome-associated membrane glycoprotein 1	N84	Hex(6)HexNAc(4)Fuc(1)NeuAc(1)	N-terminus
P11279	Lysosome-associated membrane glycoprotein 1	N84	Hex(6)HexNAc(4)Fuc(3)	N-terminus
P11279	Lysosome-associated membrane glycoprotein 1	N84	Hex(6)HexNAc(5)Fuc(1)	N-terminus
P11279	Lysosome-associated membrane glycoprotein 1	N84	Hex(6)HexNAc(5)Fuc(1)NeuAc(1)	N-terminus
P11279	Lysosome-associated membrane glycoprotein 1	N84	Hex(6)HexNAc(5)Fuc(1)NeuAc(2)	N-terminus
P11279	Lysosome-associated membrane glycoprotein 1	N84	Hex(6)HexNAc(5)Fuc(2)	N-terminus
P11279	Lysosome-associated membrane glycoprotein 1	N84	Hex(6)HexNAc(5)Fuc(2)NeuAc(1)	N-terminus
P11279	Lysosome-associated membrane glycoprotein 1	N84	Hex(6)HexNAc(5)Fuc(3)	N-terminus
P11279	Lysosome-associated membrane glycoprotein 1	N84	Hex(6)HexNAc(5)NeuAc(1)	N-terminus
P11279	Lysosome-associated membrane glycoprotein 1	N84	Hex(6)HexNAc(5)NeuAc(2)	N-terminus
P11279	Lysosome-associated membrane glycoprotein 1	N84	Hex(6)HexNAc(6)Fuc(1)	N-terminus
P11279	Lysosome-associated membrane glycoprotein 1	N84	Hex(6)HexNAc(6)Fuc(1)NeuAc(1)	N-terminus
P11279	Lysosome-associated membrane glycoprotein 1	N84	Hex(6)HexNAc(6)Fuc(1)NeuAc(2)	N-terminus
P11279	Lysosome-associated membrane glycoprotein 1	N84	Hex(6)HexNAc(6)Fuc(2)	N-terminus
P11279	Lysosome-associated membrane glycoprotein 1	N84	Hex(6)HexNAc(6)Fuc(2)NeuAc(1)	N-terminus
P11279	Lysosome-associated membrane glycoprotein 1	N84	Hex(6)HexNAc(6)Fuc(3)	N-terminus
P11279	Lysosome-associated membrane glycoprotein 1	N84	Hex(6)HexNAc(6)Fuc(3)NeuAc(1)	N-terminus
P11279	Lysosome-associated membrane glycoprotein 1	N84	Hex(6)HexNAc(6)NeuAc(1)	N-terminus
P11279	Lysosome-associated membrane glycoprotein 1	N84	Hex(6)HexNAc(7)Fuc(1)	N-terminus
P11279	Lysosome-associated membrane glycoprotein 1	N84	Hex(6)HexNAc(7)Fuc(1)NeuAc(2)	N-terminus
P11279	Lysosome-associated membrane glycoprotein 1	N84	Hex(6)HexNAc(7)Fuc(3)NeuAc(1)	N-terminus
P11279	Lysosome-associated membrane glycoprotein 1	N84	Hex(7)HexNAc(4)Fuc(1)NeuAc(1)	N-terminus
P11279	Lysosome-associated membrane glycoprotein 1	N84	Hex(7)HexNAc(7)Fuc(1)	N-terminus
P11279	Lysosome-associated membrane glycoprotein 1	N84	Hex(7)HexNAc(7)Fuc(1)NeuAc(1)	N-terminus
P11279	Lysosome-associated membrane glycoprotein 1	N84	Hex(7)HexNAc(7)Fuc(1)NeuAc(2)	N-terminus
P11279	Lysosome-associated membrane glycoprotein 1	N84	Hex(7)HexNAc(7)Fuc(2)NeuAc(1)	N-terminus
P11279	Lysosome-associated membrane glycoprotein 1	N103	Hex(4)HexNAc(5)NeuAc(1)	N-terminus
P11279	Lysosome-associated membrane glycoprotein 1	N103	Hex(4)HexNAc(6)Fuc(2)	N-terminus
P11279	Lysosome-associated membrane glycoprotein 1	N103	Hex(5)HexNAc(2)	N-terminus
P11279	Lysosome-associated membrane glycoprotein 1	N103	Hex(5)HexNAc(3)NeuAc(1)	N-terminus
P11279	Lysosome-associated membrane glycoprotein 1	N103	Hex(5)HexNAc(4)	N-terminus
P11279	Lysosome-associated membrane glycoprotein 1	N103	Hex(5)HexNAc(4)NeuAc(1)	N-terminus
P11279	Lysosome-associated membrane glycoprotein 1	N103	Hex(5)HexNAc(5)	N-terminus
P11279	Lysosome-associated membrane glycoprotein 1	N103	Hex(5)HexNAc(5)Fuc(1)	N-terminus
P11279	Lysosome-associated membrane glycoprotein 1	N103	Hex(5)HexNAc(5)NeuAc(1)	N-terminus
P11279	Lysosome-associated membrane glycoprotein 1	N103	Hex(6)HexNAc(2)	N-terminus
P11279	Lysosome-associated membrane glycoprotein 1	N103	Hex(6)HexNAc(3)	N-terminus
P11279	Lysosome-associated membrane glycoprotein 1	N103	Hex(6)HexNAc(3)NeuAc(1)	N-terminus
P11279	Lysosome-associated membrane glycoprotein 1	N103	Hex(6)HexNAc(4)	N-terminus
P11279	Lysosome-associated membrane glycoprotein 1	N103	Hex(6)HexNAc(4)Fuc(1)	N-terminus
P11279	Lysosome-associated membrane glycoprotein 1	N103	Hex(6)HexNAc(4)NeuAc(1)	N-terminus
P11279	Lysosome-associated membrane glycoprotein 1	N103	Hex(6)HexNAc(5)	N-terminus
P11279	Lysosome-associated membrane glycoprotein 1	N103	Hex(6)HexNAc(5)Fuc(1)	N-terminus
P11279	Lysosome-associated membrane glycoprotein 1	N103	Hex(7)HexNAc(2)	N-terminus
P11279	Lysosome-associated membrane glycoprotein 1	N103	Hex(7)HexNAc(4)	N-terminus
P11279	Lysosome-associated membrane glycoprotein 1	N103	Hex(7)HexNAc(4)Fuc(1)	N-terminus
P11279	Lysosome-associated membrane glycoprotein 1	N103	Hex(7)HexNAc(4)NeuAc(1)	N-terminus
P11279	Lysosome-associated membrane glycoprotein 1	N103	Hex(7)HexNAc(5)	N-terminus
P11279	Lysosome-associated membrane glycoprotein 1	N103	Hex(9)HexNAc(2)	N-terminus
P11279	Lysosome-associated membrane glycoprotein 1	N103	Hex(10)HexNAc(2)	N-terminus
P11279	Lysosome-associated membrane glycoprotein 1	N249	Hex(4)HexNAc(3)Fuc(1)NeuAc(1)	N-terminus
P11279	Lysosome-associated membrane glycoprotein 1	N249	Hex(4)HexNAc(4)Fuc(1)	N-terminus
P11279	Lysosome-associated membrane glycoprotein 1	N249	Hex(4)HexNAc(4)Fuc(1)NeuAc(1)	N-terminus
P11279	Lysosome-associated membrane glycoprotein 1	N249	Hex(4)HexNAc(5)Fuc(1)	N-terminus
P11279	Lysosome-associated membrane glycoprotein 1	N249	Hex(4)HexNAc(5)Fuc(1)NeuAc(1)	N-terminus
P11279	Lysosome-associated membrane glycoprotein 1	N249	Hex(5)HexNAc(4)Fuc(1)NeuAc(1)	N-terminus
P11279	Lysosome-associated membrane glycoprotein 1	N249	Hex(5)HexNAc(4)Fuc(1)NeuAc(2)	N-terminus
P11279	Lysosome-associated membrane glycoprotein 1	N249	Hex(5)HexNAc(5)Fuc(1)	N-terminus
P11279	Lysosome-associated membrane glycoprotein 1	N249	Hex(5)HexNAc(5)Fuc(1)NeuAc(1)	N-terminus
P11279	Lysosome-associated membrane glycoprotein 1	N249	Hex(5)HexNAc(5)Fuc(1)NeuAc(2)	N-terminus
P11279	Lysosome-associated membrane glycoprotein 1	N249	Hex(6)HexNAc(6)Fuc(1)	N-terminus
P11279	Lysosome-associated membrane glycoprotein 1	N249	Hex(6)HexNAc(6)Fuc(1)NeuAc(1)	N-terminus
P11279	Lysosome-associated membrane glycoprotein 1	N249	Hex(6)HexNAc(6)Fuc(2)	N-terminus
P11279	Lysosome-associated membrane glycoprotein 1	N249	Hex(4)HexNAc(4)Fuc(1)NeuAc(1)	N-terminus
P11279	Lysosome-associated membrane glycoprotein 1	N249	Hex(5)HexNAc(5)Fuc(1)NeuAc(1)	N-terminus
P11279	Lysosome-associated membrane glycoprotein 1	N249	Hex(5)HexNAc(5)Fuc(1)NeuAc(2)	N-terminus
P11279	Lysosome-associated membrane glycoprotein 1	N249	Hex(9)HexNAc(2)	N-terminus
P11279	Lysosome-associated membrane glycoprotein 1	N261	Hex(3)HexNAc(5)Fuc(1)	N-terminus
P11279	Lysosome-associated membrane glycoprotein 1	N261	Hex(4)HexNAc(3)Fuc(1)	N-terminus
P11279	Lysosome-associated membrane glycoprotein 1	N261	Hex(4)HexNAc(3)Fuc(1)NeuAc(1)	N-terminus
P11279	Lysosome-associated membrane glycoprotein 1	N261	Hex(4)HexNAc(4)Fuc(1)	N-terminus
P11279	Lysosome-associated membrane glycoprotein 1	N261	Hex(4)HexNAc(5)Fuc(1)	N-terminus
P11279	Lysosome-associated membrane glycoprotein 1	N261	Hex(4)HexNAc(5)Fuc(4)NeuAc(1)	N-terminus
P11279	Lysosome-associated membrane glycoprotein 1	N261	Hex(4)HexNAc(6)Fuc(1)	N-terminus
P11279	Lysosome-associated membrane glycoprotein 1	N261	Hex(5)HexNAc(2)	N-terminus
P11279	Lysosome-associated membrane glycoprotein 1	N261	Hex(5)HexNAc(3)Fuc(1)NeuAc(1)	N-terminus
P11279	Lysosome-associated membrane glycoprotein 1	N261	Hex(5)HexNAc(3)NeuAc(1)	N-terminus
P11279	Lysosome-associated membrane glycoprotein 1	N261	Hex(5)HexNAc(4)	N-terminus
P11279	Lysosome-associated membrane glycoprotein 1	N261	Hex(5)HexNAc(4)Fuc(1)	N-terminus
P11279	Lysosome-associated membrane glycoprotein 1	N261	Hex(5)HexNAc(4)Fuc(1)NeuAc(1)	N-terminus
P11279	Lysosome-associated membrane glycoprotein 1	N261	Hex(5)HexNAc(5)Fuc(1)	N-terminus
P11279	Lysosome-associated membrane glycoprotein 1	N261	Hex(5)HexNAc(5)Fuc(1)NeuAc(1)	N-terminus
P11279	Lysosome-associated membrane glycoprotein 1	N261	Hex(5)HexNAc(5)Fuc(3)	N-terminus
P11279	Lysosome-associated membrane glycoprotein 1	N261	Hex(5)HexNAc(6)Fuc(1)	N-terminus
P11279	Lysosome-associated membrane glycoprotein 1	N261	Hex(6)HexNAc(2)	N-terminus
P11279	Lysosome-associated membrane glycoprotein 1	N261	Hex(6)HexNAc(3)	N-terminus
P11279	Lysosome-associated membrane glycoprotein 1	N261	Hex(6)HexNAc(3)Fuc(1)	N-terminus
P11279	Lysosome-associated membrane glycoprotein 1	N261	Hex(6)HexNAc(3)Fuc(1)NeuAc(1)	N-terminus
P11279	Lysosome-associated membrane glycoprotein 1	N261	Hex(6)HexNAc(3)NeuAc(1)	N-terminus
P11279	Lysosome-associated membrane glycoprotein 1	N261	Hex(6)HexNAc(4)	N-terminus
P11279	Lysosome-associated membrane glycoprotein 1	N261	Hex(6)HexNAc(4)Fuc(1)	N-terminus
P11279	Lysosome-associated membrane glycoprotein 1	N261	Hex(6)HexNAc(4)Fuc(1)NeuAc(1)	N-terminus
P11279	Lysosome-associated membrane glycoprotein 1	N261	Hex(6)HexNAc(5)Fuc(1)	N-terminus
P11279	Lysosome-associated membrane glycoprotein 1	N261	Hex(6)HexNAc(6)Fuc(1)	N-terminus
P11279	Lysosome-associated membrane glycoprotein 1	N261	Hex(6)HexNAc(6)Fuc(1)NeuAc(1)	N-terminus
P11279	Lysosome-associated membrane glycoprotein 1	N261	Hex(6)HexNAc(6)Fuc(2)	N-terminus
P11279	Lysosome-associated membrane glycoprotein 1	N261	Hex(6)HexNAc(6)Fuc(2)NeuAc(1)	N-terminus
P11279	Lysosome-associated membrane glycoprotein 1	N261	Hex(6)HexNAc(6)NeuAc(2)	N-terminus
P11279	Lysosome-associated membrane glycoprotein 1	N261	Hex(6)HexNAc(7)Fuc(1)	N-terminus
P11279	Lysosome-associated membrane glycoprotein 1	N261	Hex(7)HexNAc(2)	N-terminus
P11279	Lysosome-associated membrane glycoprotein 1	N261	Hex(7)HexNAc(4)Fuc(1)	N-terminus
P11279	Lysosome-associated membrane glycoprotein 1	N261	Hex(7)HexNAc(5)Fuc(1)	N-terminus
P11279	Lysosome-associated membrane glycoprotein 1	N261	Hex(7)HexNAc(6)Fuc(1)	N-terminus
P11279	Lysosome-associated membrane glycoprotein 1	N261	Hex(7)HexNAc(6)Fuc(1)NeuAc(1)	N-terminus
P11279	Lysosome-associated membrane glycoprotein 1	N261	Hex(7)HexNAc(6)Fuc(1)NeuAc(2)	N-terminus
P11279	Lysosome-associated membrane glycoprotein 1	N261	Hex(7)HexNAc(6)Fuc(2)NeuAc(1)	N-terminus
P11279	Lysosome-associated membrane glycoprotein 1	N261	Hex(7)HexNAc(7)Fuc(1)	N-terminus
P11279	Lysosome-associated membrane glycoprotein 1	N261	Hex(7)HexNAc(7)Fuc(2)	N-terminus
P11279	Lysosome-associated membrane glycoprotein 1	N261	Hex(8)HexNAc(2)	N-terminus
P11279	Lysosome-associated membrane glycoprotein 1	N261	Hex(9)HexNAc(2)	N-terminus
P11279	Lysosome-associated membrane glycoprotein 1	N322	Hex(8)HexNAc(2)	N-terminus
P11279	Lysosome-associated membrane glycoprotein 1	N322	Hex(9)HexNAc(2)	N-terminus
P11279	Lysosome-associated membrane glycoprotein 1	N322	Hex(10)HexNAc(2)	N-terminus
P11717	Cation-independent mannose-6-phosphate receptor	N112	Hex(4)HexNAc(5)Fuc(1)	N-terminus
P11717	Cation-independent mannose-6-phosphate receptor	N112	Hex(4)HexNAc(5)Fuc(1)NeuAc(1)	N-terminus
P11717	Cation-independent mannose-6-phosphate receptor	N112	Hex(5)HexNAc(5)Fuc(1)	N-terminus
P11717	Cation-independent mannose-6-phosphate receptor	N112	Hex(5)HexNAc(5)Fuc(1)NeuAc(1)	N-terminus
P11717	Cation-independent mannose-6-phosphate receptor	N112	Hex(8)HexNAc(2)	N-terminus
P11717	Cation-independent mannose-6-phosphate receptor	N112	Hex(9)HexNAc(2)	N-terminus
P11717	Cation-independent mannose-6-phosphate receptor	N400	Hex(7)HexNAc(2)	N-terminus
P11717	Cation-independent mannose-6-phosphate receptor	N400	Hex(8)HexNAc(2)	N-terminus
P11717	Cation-independent mannose-6-phosphate receptor	N400	Hex(9)HexNAc(2)	N-terminus
P11717	Cation-independent mannose-6-phosphate receptor	N400	Hex(10)HexNAc(2)	N-terminus
P11717	Cation-independent mannose-6-phosphate receptor	N435	Hex(9)HexNAc(2)	N-terminus
P11717	Cation-independent mannose-6-phosphate receptor	N581	Hex(6)HexNAc(2)	N-terminus
P11717	Cation-independent mannose-6-phosphate receptor	N581	Hex(7)HexNAc(2)	N-terminus
P11717	Cation-independent mannose-6-phosphate receptor	N581	Hex(8)HexNAc(2)	N-terminus
P11717	Cation-independent mannose-6-phosphate receptor	N581	Hex(9)HexNAc(2)	N-terminus
P11717	Cation-independent mannose-6-phosphate receptor	N581	Hex(10)HexNAc(2)	N-terminus
P11717	Cation-independent mannose-6-phosphate receptor	N747	Hex(4)HexNAc(4)Fuc(1)	N-terminus
P11717	Cation-independent mannose-6-phosphate receptor	N747	Hex(4)HexNAc(5)Fuc(1)	N-terminus
P11717	Cation-independent mannose-6-phosphate receptor	N747	Hex(5)HexNAc(5)Fuc(1)	N-terminus
P11717	Cation-independent mannose-6-phosphate receptor	N747	Hex(5)HexNAc(5)Fuc(1)NeuAc(1)	N-terminus
P11717	Cation-independent mannose-6-phosphate receptor	N747	Hex(8)HexNAc(2)	N-terminus
P11717	Cation-independent mannose-6-phosphate receptor	N747	Hex(9)HexNAc(2)	N-terminus
P11717	Cation-independent mannose-6-phosphate receptor	N871	Hex(5)HexNAc(4)Fuc(1)NeuAc(2)	N-terminus
P11717	Cation-independent mannose-6-phosphate receptor	N871	Hex(5)HexNAc(5)Fuc(1)NeuAc(1)	N-terminus
P11717	Cation-independent mannose-6-phosphate receptor	N871	Hex(6)HexNAc(5)Fuc(2)NeuAc(1)	N-terminus
P11717	Cation-independent mannose-6-phosphate receptor	N871	Hex(9)HexNAc(2)	N-terminus
P11717	Cation-independent mannose-6-phosphate receptor	N1312	Hex(7)HexNAc(2)	N-terminus
P11717	Cation-independent mannose-6-phosphate receptor	N1312	Hex(8)HexNAc(2)	N-terminus
P11717	Cation-independent mannose-6-phosphate receptor	N1312	Hex(9)HexNAc(2)	N-terminus
P11717	Cation-independent mannose-6-phosphate receptor	N1312	Hex(10)HexNAc(2)	N-terminus
P11717	Cation-independent mannose-6-phosphate receptor	N1656	Hex(4)HexNAc(5)Fuc(1)	N-terminus
P11717	Cation-independent mannose-6-phosphate receptor	N1656	Hex(4)HexNAc(5)Fuc(1)NeuAc(1)	N-terminus
P11717	Cation-independent mannose-6-phosphate receptor	N1656	Hex(4)HexNAc(5)Fuc(2)	N-terminus
P11717	Cation-independent mannose-6-phosphate receptor	N1656	Hex(5)HexNAc(5)Fuc(1)NeuAc(1)	N-terminus
P11717	Cation-independent mannose-6-phosphate receptor	N1656	Hex(6)HexNAc(4)	N-terminus
P11717	Cation-independent mannose-6-phosphate receptor	N1656	Hex(8)HexNAc(2)	N-terminus
P11717	Cation-independent mannose-6-phosphate receptor	N1656	Hex(9)HexNAc(2)	N-terminus
P11717	Cation-independent mannose-6-phosphate receptor	N1656	Hex(10)HexNAc(2)	N-terminus
P11717	Cation-independent mannose-6-phosphate receptor	N1757	Hex(5)HexNAc(5)NeuAc(2)	N-terminus
P11717	Cation-independent mannose-6-phosphate receptor	N2136	Hex(5)HexNAc(5)Fuc(1)NeuAc(1)	N-terminus
P13473	Lysosome-associated membrane glycoprotein 2	N49	Hex(5)HexNAc(5)NeuAc(1)	N-terminus
P13473	Lysosome-associated membrane glycoprotein 2	N49	Hex(6)HexNAc(6)	N-terminus
P13473	Lysosome-associated membrane glycoprotein 2	N58	Hex(4)HexNAc(4)Fuc(1)NeuAc(1)	N-terminus
P13473	Lysosome-associated membrane glycoprotein 2	N257	Hex(3)HexNAc(2)Fuc(1)	N-terminus
P13473	Lysosome-associated membrane glycoprotein 2	N257	Hex(4)HexNAc(4)Fuc(1)	N-terminus
P13473	Lysosome-associated membrane glycoprotein 2	N257	Hex(4)HexNAc(5)Fuc(4)NeuAc(1)	N-terminus
P13473	Lysosome-associated membrane glycoprotein 2	N257	Hex(4)HexNAc(6)Fuc(1)	N-terminus
P13473	Lysosome-associated membrane glycoprotein 2	N257	Hex(5)HexNAc(5)Fuc(1)	N-terminus
P13473	Lysosome-associated membrane glycoprotein 2	N257	Hex(5)HexNAc(5)Fuc(1)NeuAc(1)	N-terminus
P13473	Lysosome-associated membrane glycoprotein 2	N257	Hex(5)HexNAc(5)Fuc(4)NeuAc(1)	N-terminus
P13473	Lysosome-associated membrane glycoprotein 2	N257	Hex(5)HexNAc(6)Fuc(1)	N-terminus
P13473	Lysosome-associated membrane glycoprotein 2	N257	Hex(5)HexNAc(6)Fuc(1)NeuAc(1)	N-terminus
P13473	Lysosome-associated membrane glycoprotein 2	N257	Hex(5)HexNAc(6)Fuc(2)	N-terminus
P13473	Lysosome-associated membrane glycoprotein 2	N257	Hex(5)HexNAc(6)NeuAc(1)	N-terminus
P13473	Lysosome-associated membrane glycoprotein 2	N257	Hex(5)HexNAc(7)Fuc(1)	N-terminus
P13473	Lysosome-associated membrane glycoprotein 2	N257	Hex(6)HexNAc(4)Fuc(1)NeuAc(2)	N-terminus
P13473	Lysosome-associated membrane glycoprotein 2	N257	Hex(6)HexNAc(5)Fuc(1)	N-terminus
P13473	Lysosome-associated membrane glycoprotein 2	N257	Hex(6)HexNAc(5)Fuc(1)NeuAc(1)	N-terminus
P13473	Lysosome-associated membrane glycoprotein 2	N257	Hex(6)HexNAc(5)Fuc(1)NeuAc(2)	N-terminus
P13473	Lysosome-associated membrane glycoprotein 2	N257	Hex(6)HexNAc(5)Fuc(2)NeuAc(1)	N-terminus
P13473	Lysosome-associated membrane glycoprotein 2	N257	Hex(6)HexNAc(5)Fuc(3)NeuAc(1)	N-terminus
P13473	Lysosome-associated membrane glycoprotein 2	N257	Hex(6)HexNAc(5)NeuAc(2)	N-terminus
P13473	Lysosome-associated membrane glycoprotein 2	N257	Hex(6)HexNAc(6)Fuc(1)	N-terminus
P13473	Lysosome-associated membrane glycoprotein 2	N257	Hex(6)HexNAc(6)Fuc(1)NeuAc(1)	N-terminus
P13473	Lysosome-associated membrane glycoprotein 2	N257	Hex(6)HexNAc(6)Fuc(1)NeuAc(2)	N-terminus
P13473	Lysosome-associated membrane glycoprotein 2	N257	Hex(6)HexNAc(6)Fuc(1)NeuAc(3)	N-terminus
P13473	Lysosome-associated membrane glycoprotein 2	N257	Hex(6)HexNAc(6)Fuc(2)	N-terminus
P13473	Lysosome-associated membrane glycoprotein 2	N257	Hex(6)HexNAc(6)Fuc(2)NeuAc(1)	N-terminus
P13473	Lysosome-associated membrane glycoprotein 2	N257	Hex(6)HexNAc(6)Fuc(3)	N-terminus
P13473	Lysosome-associated membrane glycoprotein 2	N257	Hex(6)HexNAc(6)Fuc(4)	N-terminus
P13473	Lysosome-associated membrane glycoprotein 2	N257	Hex(6)HexNAc(6)Fuc(4)NeuAc(1)	N-terminus
P13473	Lysosome-associated membrane glycoprotein 2	N257	Hex(6)HexNAc(6)NeuAc(1)	N-terminus
P13473	Lysosome-associated membrane glycoprotein 2	N257	Hex(6)HexNAc(6)NeuAc(2)	N-terminus
P13473	Lysosome-associated membrane glycoprotein 2	N257	Hex(6)HexNAc(7)Fuc(1)	N-terminus
P13473	Lysosome-associated membrane glycoprotein 2	N257	Hex(6)HexNAc(7)Fuc(2)	N-terminus
P13473	Lysosome-associated membrane glycoprotein 2	N257	Hex(7)HexNAc(6)Fuc(1)	N-terminus
P13473	Lysosome-associated membrane glycoprotein 2	N257	Hex(7)HexNAc(6)Fuc(1)NeuAc(1)	N-terminus
P13473	Lysosome-associated membrane glycoprotein 2	N257	Hex(7)HexNAc(6)Fuc(1)NeuAc(2)	N-terminus
P13473	Lysosome-associated membrane glycoprotein 2	N257	Hex(7)HexNAc(6)Fuc(2)	N-terminus
P13473	Lysosome-associated membrane glycoprotein 2	N257	Hex(7)HexNAc(6)Fuc(2)NeuAc(1)	N-terminus
P13473	Lysosome-associated membrane glycoprotein 2	N257	Hex(7)HexNAc(6)Fuc(3)	N-terminus
P13473	Lysosome-associated membrane glycoprotein 2	N257	Hex(7)HexNAc(6)Fuc(5)	N-terminus
P13473	Lysosome-associated membrane glycoprotein 2	N257	Hex(7)HexNAc(7)Fuc(1)	N-terminus
P13473	Lysosome-associated membrane glycoprotein 2	N257	Hex(7)HexNAc(7)Fuc(1)NeuAc(1)	N-terminus
P13473	Lysosome-associated membrane glycoprotein 2	N257	Hex(7)HexNAc(7)Fuc(2)	N-terminus
P13473	Lysosome-associated membrane glycoprotein 2	N257	Hex(8)HexNAc(2)	N-terminus
P13473	Lysosome-associated membrane glycoprotein 2	N257	Hex(9)HexNAc(2)	N-terminus
P13473	Lysosome-associated membrane glycoprotein 2	N257	Hex(10)HexNAc(2)	N-terminus
P13473	Lysosome-associated membrane glycoprotein 2	N275	Hex(5)HexNAc(4)NeuAc(1)	N-terminus
P13473	Lysosome-associated membrane glycoprotein 2	N275	Hex(5)HexNAc(5)	N-terminus
P13473	Lysosome-associated membrane glycoprotein 2	N275	Hex(5)HexNAc(5)Fuc(1)NeuAc(1)	N-terminus
P13473	Lysosome-associated membrane glycoprotein 2	N275	Hex(5)HexNAc(5)NeuAc(1)	N-terminus
P13473	Lysosome-associated membrane glycoprotein 2	N275	Hex(6)HexNAc(6)Fuc(1)NeuAc(1)	N-terminus
P13473	Lysosome-associated membrane glycoprotein 2	N275	Hex(6)HexNAc(6)NeuAc(1)	N-terminus
P13473	Lysosome-associated membrane glycoprotein 2	N275	Hex(6)HexNAc(7)NeuAc(1)	N-terminus
P13473	Lysosome-associated membrane glycoprotein 2	N275	Hex(7)HexNAc(6)NeuAc(1)	N-terminus
P13473	Lysosome-associated membrane glycoprotein 2	N275	Hex(7)HexNAc(7)Fuc(1)	N-terminus
P13473	Lysosome-associated membrane glycoprotein 2	N275	Hex(7)HexNAc(7)Fuc(1)NeuAc(1)	N-terminus
P13473	Lysosome-associated membrane glycoprotein 2	N275	Hex(7)HexNAc(7)NeuAc(1)	N-terminus
P13473	Lysosome-associated membrane glycoprotein 2	N356	Hex(4)HexNAc(3)Fuc(1)NeuAc(1)	N-terminus
P13473	Lysosome-associated membrane glycoprotein 2	N356	Hex(4)HexNAc(3)NeuAc(1)	N-terminus
P13473	Lysosome-associated membrane glycoprotein 2	N356	Hex(4)HexNAc(4)Fuc(1)	N-terminus
P13473	Lysosome-associated membrane glycoprotein 2	N356	Hex(4)HexNAc(5)	N-terminus
P13473	Lysosome-associated membrane glycoprotein 2	N356	Hex(4)HexNAc(5)Fuc(1)	N-terminus
P13473	Lysosome-associated membrane glycoprotein 2	N356	Hex(4)HexNAc(6)Fuc(1)	N-terminus
P13473	Lysosome-associated membrane glycoprotein 2	N356	Hex(5)HexNAc(3)	N-terminus
P13473	Lysosome-associated membrane glycoprotein 2	N356	Hex(5)HexNAc(3)Fuc(1)NeuAc(1)	N-terminus
P13473	Lysosome-associated membrane glycoprotein 2	N356	Hex(5)HexNAc(3)NeuAc(1)	N-terminus
P13473	Lysosome-associated membrane glycoprotein 2	N356	Hex(5)HexNAc(4)	N-terminus
P13473	Lysosome-associated membrane glycoprotein 2	N356	Hex(5)HexNAc(4)Fuc(1)	N-terminus
P13473	Lysosome-associated membrane glycoprotein 2	N356	Hex(5)HexNAc(4)Fuc(1)NeuAc(1)	N-terminus
P13473	Lysosome-associated membrane glycoprotein 2	N356	Hex(5)HexNAc(4)Fuc(2)	N-terminus
P13473	Lysosome-associated membrane glycoprotein 2	N356	Hex(5)HexNAc(4)Fuc(3)	N-terminus
P13473	Lysosome-associated membrane glycoprotein 2	N356	Hex(5)HexNAc(4)Fuc(3)NeuAc(1)	N-terminus
P13473	Lysosome-associated membrane glycoprotein 2	N356	Hex(5)HexNAc(4)NeuAc(1)	N-terminus
P13473	Lysosome-associated membrane glycoprotein 2	N356	Hex(5)HexNAc(4)NeuAc(2)	N-terminus
P13473	Lysosome-associated membrane glycoprotein 2	N356	Hex(5)HexNAc(5)	N-terminus
P13473	Lysosome-associated membrane glycoprotein 2	N356	Hex(5)HexNAc(5)Fuc(1)	N-terminus
P13473	Lysosome-associated membrane glycoprotein 2	N356	Hex(5)HexNAc(5)Fuc(1)NeuAc(1)	N-terminus
P13473	Lysosome-associated membrane glycoprotein 2	N356	Hex(5)HexNAc(6)	N-terminus
P13473	Lysosome-associated membrane glycoprotein 2	N356	Hex(5)HexNAc(6)Fuc(1)	N-terminus
P13473	Lysosome-associated membrane glycoprotein 2	N356	Hex(5)HexNAc(6)Fuc(1)NeuAc(1)	N-terminus
P13473	Lysosome-associated membrane glycoprotein 2	N356	Hex(5)HexNAc(6)Fuc(2)	N-terminus
P13473	Lysosome-associated membrane glycoprotein 2	N356	Hex(5)HexNAc(6)NeuAc(1)	N-terminus
P13473	Lysosome-associated membrane glycoprotein 2	N356	Hex(6)HexNAc(2)	N-terminus
P13473	Lysosome-associated membrane glycoprotein 2	N356	Hex(6)HexNAc(3)	N-terminus
P13473	Lysosome-associated membrane glycoprotein 2	N356	Hex(6)HexNAc(3)NeuAc(1)	N-terminus
P13473	Lysosome-associated membrane glycoprotein 2	N356	Hex(6)HexNAc(4)	N-terminus
P13473	Lysosome-associated membrane glycoprotein 2	N356	Hex(6)HexNAc(5)Fuc(1)	N-terminus
P13473	Lysosome-associated membrane glycoprotein 2	N356	Hex(6)HexNAc(5)Fuc(1)NeuAc(1)	N-terminus
P13473	Lysosome-associated membrane glycoprotein 2	N356	Hex(6)HexNAc(5)Fuc(1)NeuAc(2)	N-terminus
P13473	Lysosome-associated membrane glycoprotein 2	N356	Hex(6)HexNAc(5)NeuAc(1)	N-terminus
P13473	Lysosome-associated membrane glycoprotein 2	N356	Hex(6)HexNAc(6)	N-terminus
P13473	Lysosome-associated membrane glycoprotein 2	N356	Hex(6)HexNAc(6)Fuc(1)	N-terminus
P13473	Lysosome-associated membrane glycoprotein 2	N356	Hex(6)HexNAc(6)Fuc(1)NeuAc(1)	N-terminus
P13473	Lysosome-associated membrane glycoprotein 2	N356	Hex(6)HexNAc(6)Fuc(2)	N-terminus
P13473	Lysosome-associated membrane glycoprotein 2	N356	Hex(6)HexNAc(6)Fuc(2)NeuAc(1)	N-terminus
P13473	Lysosome-associated membrane glycoprotein 2	N356	Hex(6)HexNAc(6)NeuAc(2)	N-terminus
P13473	Lysosome-associated membrane glycoprotein 2	N356	Hex(6)HexNAc(7)Fuc(4)NeuAc(1)	N-terminus
P13473	Lysosome-associated membrane glycoprotein 2	N356	Hex(7)HexNAc(2)	N-terminus
P13473	Lysosome-associated membrane glycoprotein 2	N356	Hex(8)HexNAc(2)	N-terminus
P13473	Lysosome-associated membrane glycoprotein 2	N356	Hex(9)HexNAc(2)	N-terminus
P13688	Carcinoembryonic antigen-related cell adhesion molecule 1	N197	Hex(8)HexNAc(2)	N-terminus
P13688	Carcinoembryonic antigen-related cell adhesion molecule 1	N352	Hex(4)HexNAc(5)Fuc(1)	N-terminus
P13688	Carcinoembryonic antigen-related cell adhesion molecule 1	N352	Hex(5)HexNAc(5)Fuc(1)	N-terminus
P13688	Carcinoembryonic antigen-related cell adhesion molecule 1	N352	Hex(5)HexNAc(5)Fuc(1)NeuAc(1)	N-terminus
P13688	Carcinoembryonic antigen-related cell adhesion molecule 1	N352	Hex(6)HexNAc(6)Fuc(1)	N-terminus
P13688	Carcinoembryonic antigen-related cell adhesion molecule 1	N363	Hex(5)HexNAc(5)Fuc(1)	N-terminus
P13688	Carcinoembryonic antigen-related cell adhesion molecule 1	N363	Hex(5)HexNAc(5)Fuc(1)NeuAc(1)	N-terminus
P13688	Carcinoembryonic antigen-related cell adhesion molecule 1	N363	Hex(5)HexNAc(5)Fuc(4)	N-terminus
P13688	Carcinoembryonic antigen-related cell adhesion molecule 1	N363	Hex(6)HexNAc(3)NeuAc(1)	N-terminus
P13688	Carcinoembryonic antigen-related cell adhesion molecule 1	N363	Hex(6)HexNAc(5)NeuAc(2)	N-terminus
P13688	Carcinoembryonic antigen-related cell adhesion molecule 1	N363	Hex(6)HexNAc(6)Fuc(1)NeuAc(1)	N-terminus
P13688	Carcinoembryonic antigen-related cell adhesion molecule 1	N363	Hex(6)HexNAc(6)Fuc(1)NeuAc(2)	N-terminus
P13688	Carcinoembryonic antigen-related cell adhesion molecule 1	N363	Hex(6)HexNAc(6)Fuc(2)	N-terminus
P13688	Carcinoembryonic antigen-related cell adhesion molecule 1	N363	Hex(6)HexNAc(6)Fuc(2)NeuAc(1)	N-terminus
P13688	Carcinoembryonic antigen-related cell adhesion molecule 1	N363	Hex(6)HexNAc(6)Fuc(3)	N-terminus
P13688	Carcinoembryonic antigen-related cell adhesion molecule 1	N363	Hex(6)HexNAc(6)Fuc(4)	N-terminus
P13688	Carcinoembryonic antigen-related cell adhesion molecule 1	N378	Hex(4)HexNAc(3)Fuc(2)	N-terminus
P13688	Carcinoembryonic antigen-related cell adhesion molecule 1	N378	Hex(4)HexNAc(3)NeuAc(1)	N-terminus
P13688	Carcinoembryonic antigen-related cell adhesion molecule 1	N378	Hex(5)HexNAc(2)	N-terminus
P13688	Carcinoembryonic antigen-related cell adhesion molecule 1	N378	Hex(5)HexNAc(3)NeuAc(1)	N-terminus
P13688	Carcinoembryonic antigen-related cell adhesion molecule 1	N378	Hex(5)HexNAc(4)	N-terminus
P13688	Carcinoembryonic antigen-related cell adhesion molecule 1	N378	Hex(6)HexNAc(2)	N-terminus
P13688	Carcinoembryonic antigen-related cell adhesion molecule 1	N378	Hex(6)HexNAc(3)	N-terminus
P13688	Carcinoembryonic antigen-related cell adhesion molecule 1	N378	Hex(6)HexNAc(3)NeuAc(1)	N-terminus
P13688	Carcinoembryonic antigen-related cell adhesion molecule 1	N378	Hex(7)HexNAc(2)	N-terminus
P13688	Carcinoembryonic antigen-related cell adhesion molecule 1	N378	Hex(8)HexNAc(2)	N-terminus
P14384	Carboxypeptidase M	N38	Hex(5)HexNAc(5)Fuc(1)NeuAc(2)	Extracellular
P14410	Sucrase-isomaltase, intestinal	N437	Hex(5)HexNAc(5)Fuc(1)	C-terminus
P14410	Sucrase-isomaltase, intestinal	N437	Hex(5)HexNAc(5)Fuc(1)NeuAc(2)	C-terminus
P14410	Sucrase-isomaltase, intestinal	N823	Hex(3)HexNAc(5)Fuc(1)	C-terminus
P14410	Sucrase-isomaltase, intestinal	N823	Hex(4)HexNAc(5)Fuc(1)	C-terminus
P14410	Sucrase-isomaltase, intestinal	N823	Hex(4)HexNAc(5)Fuc(1)NeuAc(1)	C-terminus
P14410	Sucrase-isomaltase, intestinal	N823	Hex(4)HexNAc(6)Fuc(4)	C-terminus
P14410	Sucrase-isomaltase, intestinal	N823	Hex(5)HexNAc(4)Fuc(1)NeuAc(1)	C-terminus
P14410	Sucrase-isomaltase, intestinal	N823	Hex(5)HexNAc(4)Fuc(1)NeuAc(2)	C-terminus
P14410	Sucrase-isomaltase, intestinal	N823	Hex(5)HexNAc(5)Fuc(1)	C-terminus
P14410	Sucrase-isomaltase, intestinal	N823	Hex(5)HexNAc(5)Fuc(1)NeuAc(1)	C-terminus
P14410	Sucrase-isomaltase, intestinal	N823	Hex(5)HexNAc(5)Fuc(1)NeuAc(2)	C-terminus
P14410	Sucrase-isomaltase, intestinal	N823	Hex(5)HexNAc(5)Fuc(2)	C-terminus
P14410	Sucrase-isomaltase, intestinal	N823	Hex(5)HexNAc(5)Fuc(2)NeuAc(1)	C-terminus
P14410	Sucrase-isomaltase, intestinal	N823	Hex(5)HexNAc(5)Fuc(3)	C-terminus
P14410	Sucrase-isomaltase, intestinal	N823	Hex(5)HexNAc(5)Fuc(3)NeuAc(1)	C-terminus
P14410	Sucrase-isomaltase, intestinal	N823	Hex(5)HexNAc(5)Fuc(4)	C-terminus
P14410	Sucrase-isomaltase, intestinal	N823	Hex(5)HexNAc(5)Fuc(4)NeuAc(1)	C-terminus
P14410	Sucrase-isomaltase, intestinal	N823	Hex(5)HexNAc(5)NeuAc(1)	C-terminus
P14410	Sucrase-isomaltase, intestinal	N823	Hex(5)HexNAc(5)NeuAc(2)	C-terminus
P14410	Sucrase-isomaltase, intestinal	N823	Hex(5)HexNAc(6)	C-terminus
P14410	Sucrase-isomaltase, intestinal	N823	Hex(5)HexNAc(6)Fuc(1)	C-terminus
P14410	Sucrase-isomaltase, intestinal	N823	Hex(5)HexNAc(6)Fuc(1)NeuAc(1)	C-terminus
P14410	Sucrase-isomaltase, intestinal	N823	Hex(5)HexNAc(6)Fuc(2)	C-terminus
P14410	Sucrase-isomaltase, intestinal	N823	Hex(5)HexNAc(7)Fuc(1)NeuAc(1)	C-terminus
P14410	Sucrase-isomaltase, intestinal	N823	Hex(6)HexNAc(5)Fuc(1)	C-terminus
P14410	Sucrase-isomaltase, intestinal	N823	Hex(6)HexNAc(5)Fuc(1)NeuAc(1)	C-terminus
P14410	Sucrase-isomaltase, intestinal	N823	Hex(6)HexNAc(5)Fuc(2)	C-terminus
P14410	Sucrase-isomaltase, intestinal	N823	Hex(6)HexNAc(5)Fuc(2)NeuAc(1)	C-terminus
P14410	Sucrase-isomaltase, intestinal	N823	Hex(6)HexNAc(6)Fuc(1)	C-terminus
P14410	Sucrase-isomaltase, intestinal	N823	Hex(6)HexNAc(6)Fuc(1)NeuAc(1)	C-terminus
P14410	Sucrase-isomaltase, intestinal	N823	Hex(6)HexNAc(6)Fuc(1)NeuAc(2)	C-terminus
P14410	Sucrase-isomaltase, intestinal	N823	Hex(6)HexNAc(6)Fuc(2)	C-terminus
P14410	Sucrase-isomaltase, intestinal	N823	Hex(6)HexNAc(6)Fuc(2)NeuAc(1)	C-terminus
P14410	Sucrase-isomaltase, intestinal	N823	Hex(6)HexNAc(6)Fuc(2)NeuAc(2)	C-terminus
P14410	Sucrase-isomaltase, intestinal	N823	Hex(6)HexNAc(6)Fuc(3)	C-terminus
P14410	Sucrase-isomaltase, intestinal	N823	Hex(6)HexNAc(7)Fuc(1)NeuAc(1)	C-terminus
P14410	Sucrase-isomaltase, intestinal	N823	Hex(7)HexNAc(6)Fuc(1)NeuAc(1)	C-terminus
P14410	Sucrase-isomaltase, intestinal	N823	Hex(7)HexNAc(6)Fuc(1)NeuAc(2)	C-terminus
P14410	Sucrase-isomaltase, intestinal	N823	Hex(7)HexNAc(6)Fuc(2)NeuAc(1)	C-terminus
P14410	Sucrase-isomaltase, intestinal	N823	Hex(7)HexNAc(6)Fuc(2)	C-terminus
P14410	Sucrase-isomaltase, intestinal	N823	Hex(7)HexNAc(6)Fuc(2)NeuAc(1)	C-terminus
P14410	Sucrase-isomaltase, intestinal	N823	Hex(7)HexNAc(6)Fuc(4)	C-terminus
P14410	Sucrase-isomaltase, intestinal	N823	Hex(7)HexNAc(7)Fuc(1)NeuAc(1)	C-terminus
P14410	Sucrase-isomaltase, intestinal	N823	Hex(7)HexNAc(7)Fuc(2)	C-terminus
P14410	Sucrase-isomaltase, intestinal	N823	Hex(7)HexNAc(7)Fuc(2)NeuAc(1)	C-terminus
P14410	Sucrase-isomaltase, intestinal	N823	Hex(7)HexNAc(7)Fuc(4)	C-terminus
P14410	Sucrase-isomaltase, intestinal	N823	Hex(9)HexNAc(2)	C-terminus
P14410	Sucrase-isomaltase, intestinal	N1235	Hex(5)HexNAc(5)Fuc(1)	C-terminus
P14410	Sucrase-isomaltase, intestinal	N1235	Hex(5)HexNAc(5)Fuc(1)NeuAc(1)	C-terminus
P14410	Sucrase-isomaltase, intestinal	N1235	Hex(6)HexNAc(6)Fuc(1)	C-terminus
P14410	Sucrase-isomaltase, intestinal	N1235	Hex(6)HexNAc(6)Fuc(1)NeuAc(1)	C-terminus
P14410	Sucrase-isomaltase, intestinal	N1235	Hex(9)HexNAc(2)	C-terminus
P14410	Sucrase-isomaltase, intestinal	N1303	Hex(5)HexNAc(3)	C-terminus
P14410	Sucrase-isomaltase, intestinal	N1303	Hex(5)HexNAc(3)Fuc(2)	C-terminus
P14410	Sucrase-isomaltase, intestinal	N1303	Hex(5)HexNAc(3)NeuAc(1)	C-terminus
P14410	Sucrase-isomaltase, intestinal	N1303	Hex(5)HexNAc(4)	C-terminus
P14410	Sucrase-isomaltase, intestinal	N1303	Hex(5)HexNAc(4)Fuc(1)	C-terminus
P14410	Sucrase-isomaltase, intestinal	N1303	Hex(5)HexNAc(4)Fuc(1)NeuAc(1)	C-terminus
P14410	Sucrase-isomaltase, intestinal	N1303	Hex(5)HexNAc(4)Fuc(2)NeuAc(2)	C-terminus
P14410	Sucrase-isomaltase, intestinal	N1303	Hex(5)HexNAc(4)NeuAc(1)	C-terminus
P14410	Sucrase-isomaltase, intestinal	N1303	Hex(5)HexNAc(4)NeuAc(2)	C-terminus
P14410	Sucrase-isomaltase, intestinal	N1303	Hex(5)HexNAc(5)NeuAc(2)	C-terminus
P14410	Sucrase-isomaltase, intestinal	N1303	Hex(6)HexNAc(2)	C-terminus
P14410	Sucrase-isomaltase, intestinal	N1303	Hex(6)HexNAc(3)	C-terminus
P14410	Sucrase-isomaltase, intestinal	N1303	Hex(6)HexNAc(3)Fuc(1)	C-terminus
P14410	Sucrase-isomaltase, intestinal	N1303	Hex(6)HexNAc(3)Fuc(2)	C-terminus
P14410	Sucrase-isomaltase, intestinal	N1303	Hex(6)HexNAc(3)NeuAc(1)	C-terminus
P14410	Sucrase-isomaltase, intestinal	N1303	Hex(6)HexNAc(4)	C-terminus
P14410	Sucrase-isomaltase, intestinal	N1303	Hex(6)HexNAc(4)Fuc(1)	C-terminus
P14410	Sucrase-isomaltase, intestinal	N1303	Hex(6)HexNAc(4)Fuc(1)NeuAc(1)	C-terminus
P14410	Sucrase-isomaltase, intestinal	N1303	Hex(6)HexNAc(4)Fuc(2)	C-terminus
P14410	Sucrase-isomaltase, intestinal	N1303	Hex(6)HexNAc(4)Fuc(3)	C-terminus
P14410	Sucrase-isomaltase, intestinal	N1303	Hex(6)HexNAc(4)NeuAc(1)	C-terminus
P14410	Sucrase-isomaltase, intestinal	N1303	Hex(6)HexNAc(4)NeuAc(2)	C-terminus
P14410	Sucrase-isomaltase, intestinal	N1303	Hex(6)HexNAc(5)	C-terminus
P14410	Sucrase-isomaltase, intestinal	N1303	Hex(6)HexNAc(5)Fuc(1)	C-terminus
P14410	Sucrase-isomaltase, intestinal	N1303	Hex(6)HexNAc(5)Fuc(1)NeuAc(1)	C-terminus
P14410	Sucrase-isomaltase, intestinal	N1303	Hex(6)HexNAc(5)NeuAc(1)	C-terminus
P14410	Sucrase-isomaltase, intestinal	N1303	Hex(6)HexNAc(5)NeuAc(2)	C-terminus
P14410	Sucrase-isomaltase, intestinal	N1303	Hex(7)HexNAc(2)	C-terminus
P14410	Sucrase-isomaltase, intestinal	N1303	Hex(7)HexNAc(4)	C-terminus
P14410	Sucrase-isomaltase, intestinal	N1303	Hex(7)HexNAc(4)Fuc(1)	C-terminus
P14410	Sucrase-isomaltase, intestinal	N1303	Hex(7)HexNAc(4)Fuc(1)NeuAc(1)	C-terminus
P14410	Sucrase-isomaltase, intestinal	N1303	Hex(7)HexNAc(4)Fuc(2)	C-terminus
P14410	Sucrase-isomaltase, intestinal	N1303	Hex(7)HexNAc(4)Fuc(3)	C-terminus
P14410	Sucrase-isomaltase, intestinal	N1303	Hex(7)HexNAc(4)NeuAc(1)	C-terminus
P14410	Sucrase-isomaltase, intestinal	N1303	Hex(7)HexNAc(4)NeuAc(2)	C-terminus
P14410	Sucrase-isomaltase, intestinal	N1303	Hex(7)HexNAc(5)Fuc(1)NeuAc(1)	C-terminus
P14410	Sucrase-isomaltase, intestinal	N1303	Hex(7)HexNAc(5)Fuc(2)	C-terminus
P14410	Sucrase-isomaltase, intestinal	N1303	Hex(7)HexNAc(5)Fuc(2)NeuAc(1)	C-terminus
P14410	Sucrase-isomaltase, intestinal	N1303	Hex(7)HexNAc(5)NeuAc(1)	C-terminus
P14410	Sucrase-isomaltase, intestinal	N1303	Hex(7)HexNAc(5)NeuAc(2)	C-terminus
P14410	Sucrase-isomaltase, intestinal	N1303	Hex(8)HexNAc(2)	C-terminus
P14410	Sucrase-isomaltase, intestinal	N1303	Hex(9)HexNAc(2)	C-terminus
P14410	Sucrase-isomaltase, intestinal	N1340	Hex(5)HexNAc(5)Fuc(1)	C-terminus
P14410	Sucrase-isomaltase, intestinal	N1340	Hex(5)HexNAc(5)Fuc(1)NeuAc(1)	C-terminus
P14410	Sucrase-isomaltase, intestinal	N1340	Hex(5)HexNAc(5)Fuc(1)NeuAc(2)	C-terminus
P14410	Sucrase-isomaltase, intestinal	N1340	Hex(5)HexNAc(5)Fuc(2)NeuAc(1)	C-terminus
P14410	Sucrase-isomaltase, intestinal	N1340	Hex(5)HexNAc(5)Fuc(4)NeuAc(1)	C-terminus
P14410	Sucrase-isomaltase, intestinal	N1340	Hex(6)HexNAc(5)Fuc(2)NeuAc(1)	C-terminus
P14410	Sucrase-isomaltase, intestinal	N1340	Hex(6)HexNAc(6)Fuc(1)	C-terminus
P14410	Sucrase-isomaltase, intestinal	N1340	Hex(6)HexNAc(6)Fuc(1)NeuAc(1)	C-terminus
P14410	Sucrase-isomaltase, intestinal	N1340	Hex(6)HexNAc(6)Fuc(1)NeuAc(2)	C-terminus
P14410	Sucrase-isomaltase, intestinal	N1340	Hex(6)HexNAc(6)Fuc(1)NeuAc(3)	C-terminus
P14410	Sucrase-isomaltase, intestinal	N1340	Hex(6)HexNAc(6)Fuc(2)	C-terminus
P14410	Sucrase-isomaltase, intestinal	N1340	Hex(6)HexNAc(6)Fuc(2)NeuAc(1)	C-terminus
P14410	Sucrase-isomaltase, intestinal	N1340	Hex(6)HexNAc(6)Fuc(2)NeuAc(2)	C-terminus
P14410	Sucrase-isomaltase, intestinal	N1340	Hex(6)HexNAc(6)Fuc(3)NeuAc(1)	C-terminus
P14410	Sucrase-isomaltase, intestinal	N1340	Hex(6)HexNAc(6)Fuc(3)NeuAc(2)	C-terminus
P14410	Sucrase-isomaltase, intestinal	N1340	Hex(6)HexNAc(6)Fuc(4)NeuAc(1)	C-terminus
P14410	Sucrase-isomaltase, intestinal	N1340	Hex(6)HexNAc(6)Fuc(4)NeuAc(2)	C-terminus
P14410	Sucrase-isomaltase, intestinal	N1340	Hex(6)HexNAc(6)NeuAc(1)	C-terminus
P14410	Sucrase-isomaltase, intestinal	N1340	Hex(7)HexNAc(6)Fuc(1)NeuAc(1)	C-terminus
P14410	Sucrase-isomaltase, intestinal	N1340	Hex(7)HexNAc(6)Fuc(2)NeuAc(1)	C-terminus
P14410	Sucrase-isomaltase, intestinal	N1340	Hex(7)HexNAc(6)Fuc(3)	C-terminus
P14410	Sucrase-isomaltase, intestinal	N1340	Hex(7)HexNAc(7)Fuc(1)NeuAc(1)	C-terminus
P14410	Sucrase-isomaltase, intestinal	N1340	Hex(7)HexNAc(7)Fuc(1)NeuAc(2)	C-terminus
P14410	Sucrase-isomaltase, intestinal	N1340	Hex(7)HexNAc(7)Fuc(2)	C-terminus
P14410	Sucrase-isomaltase, intestinal	N1340	Hex(7)HexNAc(7)Fuc(2)NeuAc(1)	C-terminus
P14410	Sucrase-isomaltase, intestinal	N1340	Hex(7)HexNAc(7)NeuAc(1)	C-terminus
P14410	Sucrase-isomaltase, intestinal	N1340	Hex(7)HexNAc(7)Fuc(4)	C-terminus
P14410	Sucrase-isomaltase, intestinal	N1340	Hex(9)HexNAc(2)	C-terminus
P14410	Sucrase-isomaltase, intestinal	N1340	Hex(10)HexNAc(2)	C-terminus
P14410	Sucrase-isomaltase, intestinal	N1354	Hex(4)HexNAc(5)Fuc(1)	C-terminus
P14410	Sucrase-isomaltase, intestinal	N1354	Hex(6)HexNAc(6)Fuc(1)	C-terminus
P14410	Sucrase-isomaltase, intestinal	N1354	Hex(8)HexNAc(2)	C-terminus
P14410	Sucrase-isomaltase, intestinal	N1354	Hex(9)HexNAc(2)	C-terminus
P14410	Sucrase-isomaltase, intestinal	N1354	Hex(10)HexNAc(2)	C-terminus
P14410	Sucrase-isomaltase, intestinal	N1403	Hex(4)HexNAc(4)Fuc(1)NeuAc(1)	C-terminus
P14410	Sucrase-isomaltase, intestinal	N1403	Hex(4)HexNAc(6)	C-terminus
P14410	Sucrase-isomaltase, intestinal	N1403	Hex(5)HexNAc(3)	C-terminus
P14410	Sucrase-isomaltase, intestinal	N1403	Hex(5)HexNAc(3)Fuc(2)	C-terminus
P14410	Sucrase-isomaltase, intestinal	N1403	Hex(5)HexNAc(4)Fuc(2)	C-terminus
P14410	Sucrase-isomaltase, intestinal	N1403	Hex(6)HexNAc(2)	C-terminus
P14410	Sucrase-isomaltase, intestinal	N1403	Hex(6)HexNAc(3)	C-terminus
P14410	Sucrase-isomaltase, intestinal	N1403	Hex(6)HexNAc(3)Fuc(2)	C-terminus
P14410	Sucrase-isomaltase, intestinal	N1403	Hex(6)HexNAc(3)NeuAc(1)	C-terminus
P14410	Sucrase-isomaltase, intestinal	N1403	Hex(6)HexNAc(4)Fuc(2)	C-terminus
P14410	Sucrase-isomaltase, intestinal	N1403	Hex(7)HexNAc(2)	C-terminus
P14410	Sucrase-isomaltase, intestinal	N1403	Hex(8)HexNAc(2)	C-terminus
P14410	Sucrase-isomaltase, intestinal	N1403	Hex(9)HexNAc(2)	C-terminus
P14410	Sucrase-isomaltase, intestinal	N1572	Hex(4)HexNAc(4)Fuc(1)	C-terminus
P14410	Sucrase-isomaltase, intestinal	N1572	Hex(4)HexNAc(5)Fuc(1)	C-terminus
P14410	Sucrase-isomaltase, intestinal	N1572	Hex(5)HexNAc(4)Fuc(1)	C-terminus
P14410	Sucrase-isomaltase, intestinal	N1572	Hex(5)HexNAc(5)Fuc(1)	C-terminus
P14410	Sucrase-isomaltase, intestinal	N1572	Hex(5)HexNAc(5)Fuc(1)NeuAc(1)	C-terminus
P14410	Sucrase-isomaltase, intestinal	N1572	Hex(5)HexNAc(6)Fuc(1)	C-terminus
P14410	Sucrase-isomaltase, intestinal	N1572	Hex(9)HexNAc(2)	C-terminus
P14410	Sucrase-isomaltase, intestinal	N1675	Hex(4)HexNAc(5)	C-terminus
P14410	Sucrase-isomaltase, intestinal	N1675	Hex(4)HexNAc(5)Fuc(1)	C-terminus
P14410	Sucrase-isomaltase, intestinal	N1675	Hex(4)HexNAc(5)Fuc(1)NeuAc(1)	C-terminus
P14410	Sucrase-isomaltase, intestinal	N1675	Hex(4)HexNAc(5)Fuc(2)	C-terminus
P14410	Sucrase-isomaltase, intestinal	N1675	Hex(4)HexNAc(5)Fuc(3)	C-terminus
P14410	Sucrase-isomaltase, intestinal	N1675	Hex(4)HexNAc(5)NeuAc(1)	C-terminus
P14410	Sucrase-isomaltase, intestinal	N1675	Hex(4)HexNAc(6)Fuc(1)	C-terminus
P14410	Sucrase-isomaltase, intestinal	N1675	Hex(5)HexNAc(4)Fuc(1)NeuAc(1)	C-terminus
P14410	Sucrase-isomaltase, intestinal	N1675	Hex(5)HexNAc(4)Fuc(1)NeuAc(2)	C-terminus
P14410	Sucrase-isomaltase, intestinal	N1675	Hex(5)HexNAc(4)Fuc(2)NeuAc(1)	C-terminus
P14410	Sucrase-isomaltase, intestinal	N1675	Hex(5)HexNAc(5)	C-terminus
P14410	Sucrase-isomaltase, intestinal	N1675	Hex(5)HexNAc(5)Fuc(1)	C-terminus
P14410	Sucrase-isomaltase, intestinal	N1675	Hex(5)HexNAc(5)Fuc(1)NeuAc(1)	C-terminus
P14410	Sucrase-isomaltase, intestinal	N1675	Hex(5)HexNAc(5)Fuc(1)NeuAc(2)	C-terminus
P14410	Sucrase-isomaltase, intestinal	N1675	Hex(5)HexNAc(5)Fuc(2)	C-terminus
P14410	Sucrase-isomaltase, intestinal	N1675	Hex(5)HexNAc(5)Fuc(2)NeuAc(1)	C-terminus
P14410	Sucrase-isomaltase, intestinal	N1675	Hex(5)HexNAc(5)Fuc(3)	C-terminus
P14410	Sucrase-isomaltase, intestinal	N1675	Hex(5)HexNAc(5)Fuc(3)NeuAc(1)	C-terminus
P14410	Sucrase-isomaltase, intestinal	N1675	Hex(5)HexNAc(5)Fuc(3)NeuAc(2)	C-terminus
P14410	Sucrase-isomaltase, intestinal	N1675	Hex(5)HexNAc(5)Fuc(4)NeuAc(1)	C-terminus
P14410	Sucrase-isomaltase, intestinal	N1675	Hex(5)HexNAc(5)Fuc(4)NeuAc(2)	C-terminus
P14410	Sucrase-isomaltase, intestinal	N1675	Hex(5)HexNAc(5)NeuAc(1)	C-terminus
P14410	Sucrase-isomaltase, intestinal	N1675	Hex(5)HexNAc(6)Fuc(1)	C-terminus
P14410	Sucrase-isomaltase, intestinal	N1675	Hex(5)HexNAc(6)Fuc(1)NeuAc(1)	C-terminus
P14410	Sucrase-isomaltase, intestinal	N1675	Hex(5)HexNAc(6)Fuc(2)	C-terminus
P14410	Sucrase-isomaltase, intestinal	N1675	Hex(5)HexNAc(7)Fuc(1)	C-terminus
P14410	Sucrase-isomaltase, intestinal	N1675	Hex(6)HexNAc(5)Fuc(1)NeuAc(1)	C-terminus
P14410	Sucrase-isomaltase, intestinal	N1675	Hex(6)HexNAc(6)Fuc(1)	C-terminus
P14410	Sucrase-isomaltase, intestinal	N1675	Hex(6)HexNAc(6)Fuc(1)NeuAc(1)	C-terminus
P14410	Sucrase-isomaltase, intestinal	N1675	Hex(6)HexNAc(6)Fuc(4)NeuAc(1)	C-terminus
P14410	Sucrase-isomaltase, intestinal	N1675	Hex(6)HexNAc(6)Fuc(2)	C-terminus
P14410	Sucrase-isomaltase, intestinal	N1675	Hex(6)HexNAc(7)Fuc(1)	C-terminus
P14410	Sucrase-isomaltase, intestinal	N1675	Hex(6)HexNAc(7)Fuc(2)	C-terminus
P14410	Sucrase-isomaltase, intestinal	N1675	Hex(7)HexNAc(6)Fuc(1)NeuAc(1)	C-terminus
P14410	Sucrase-isomaltase, intestinal	N1675	Hex(7)HexNAc(6)Fuc(1)NeuAc(2)	C-terminus
P14410	Sucrase-isomaltase, intestinal	N1675	Hex(7)HexNAc(6)Fuc(2)NeuAc(1)	C-terminus
P14410	Sucrase-isomaltase, intestinal	N1675	Hex(7)HexNAc(6)Fuc(2)NeuAc(2)	C-terminus
P14410	Sucrase-isomaltase, intestinal	N1675	Hex(7)HexNAc(7)Fuc(1)	C-terminus
P14410	Sucrase-isomaltase, intestinal	N1675	Hex(7)HexNAc(7)Fuc(1)NeuAc(1)	C-terminus
P14410	Sucrase-isomaltase, intestinal	N1675	Hex(7)HexNAc(7)Fuc(2)	C-terminus
P14410	Sucrase-isomaltase, intestinal	N1675	Hex(7)HexNAc(7)Fuc(2)NeuAc(1)	C-terminus
P14410	Sucrase-isomaltase, intestinal	N1675	Hex(9)HexNAc(2)	C-terminus
P14410	Sucrase-isomaltase, intestinal	N1675	Hex(10)HexNAc(2)	C-terminus
P14410	Sucrase-isomaltase, intestinal	N1763	Hex(6)HexNAc(2)	C-terminus
P14410	Sucrase-isomaltase, intestinal	N1763	Hex(7)HexNAc(2)	C-terminus
P14410	Sucrase-isomaltase, intestinal	N1763	Hex(8)HexNAc(2)	C-terminus
P14410	Sucrase-isomaltase, intestinal	N1763	Hex(9)HexNAc(2)	C-terminus
P14410	Sucrase-isomaltase, intestinal	N1815	Hex(5)HexNAc(5)Fuc(1)	C-terminus
P14410	Sucrase-isomaltase, intestinal	N1815	Hex(5)HexNAc(5)Fuc(1)NeuAc(1)	C-terminus
P15144	Aminopeptidase N	N128	Hex(4)HexNAc(5)	C-terminus
P15144	Aminopeptidase N	N128	Hex(5)HexNAc(5)	C-terminus
P15144	Aminopeptidase N	N128	Hex(5)HexNAc(5)NeuAc(1)	C-terminus
P15144	Aminopeptidase N	N234	Hex(5)HexNAc(5)	C-terminus
P15144	Aminopeptidase N	N234	Hex(5)HexNAc(6)	C-terminus
P15144	Aminopeptidase N	N234	Hex(5)HexNAc(6)Fuc(1)	C-terminus
P15144	Aminopeptidase N	N234	Hex(7)HexNAc(2)	C-terminus
P15144	Aminopeptidase N	N265	Hex(4)HexNAc(5)NeuAc(1)	C-terminus
P15144	Aminopeptidase N	N265	Hex(5)HexNAc(5)NeuAc(2)	C-terminus
P15144	Aminopeptidase N	N681	Hex(5)HexNAc(5)NeuAc(1)	C-terminus
P15151	Poliovirus receptor	N105	Hex(5)HexNAc(4)	N-terminus
P15151	Poliovirus receptor	N105	Hex(6)HexNAc(4)	N-terminus
P15151	Poliovirus receptor	N120	Hex(5)HexNAc(4)Fuc(1)NeuAc(1)	N-terminus
P15151	Poliovirus receptor	N120	Hex(5)HexNAc(4)Fuc(1)NeuAc(2)	N-terminus
P15151	Poliovirus receptor	N120	Hex(5)HexNAc(4)Fuc(2)	N-terminus
P15151	Poliovirus receptor	N120	Hex(5)HexNAc(4)Fuc(2)NeuAc(1)	N-terminus
P15151	Poliovirus receptor	N120	Hex(5)HexNAc(4)Fuc(3)	N-terminus
P15151	Poliovirus receptor	N120	Hex(5)HexNAc(4)Fuc(3)NeuAc(1)	N-terminus
P15151	Poliovirus receptor	N120	Hex(5)HexNAc(4)NeuAc(2)	N-terminus
P15151	Poliovirus receptor	N120	Hex(5)HexNAc(5)Fuc(1)	N-terminus
P15151	Poliovirus receptor	N120	Hex(5)HexNAc(5)Fuc(1)NeuAc(1)	N-terminus
P15151	Poliovirus receptor	N120	Hex(5)HexNAc(5)Fuc(1)NeuAc(2)	N-terminus
P15151	Poliovirus receptor	N120	Hex(5)HexNAc(5)Fuc(2)	N-terminus
P15151	Poliovirus receptor	N120	Hex(5)HexNAc(5)Fuc(2)NeuAc(1)	N-terminus
P15151	Poliovirus receptor	N120	Hex(5)HexNAc(5)Fuc(3)	N-terminus
P15151	Poliovirus receptor	N120	Hex(5)HexNAc(5)Fuc(3)NeuAc(1)	N-terminus
P15151	Poliovirus receptor	N120	Hex(6)HexNAc(4)Fuc(2)	N-terminus
P15151	Poliovirus receptor	N120	Hex(6)HexNAc(4)Fuc(3)	N-terminus
P15151	Poliovirus receptor	N120	Hex(6)HexNAc(5)Fuc(1)NeuAc(1)	N-terminus
P15151	Poliovirus receptor	N120	Hex(6)HexNAc(5)Fuc(2)	N-terminus
P15151	Poliovirus receptor	N120	Hex(6)HexNAc(5)Fuc(2)NeuAc(1)	N-terminus
P15151	Poliovirus receptor	N120	Hex(6)HexNAc(5)Fuc(3)NeuAc(1)	N-terminus
P15151	Poliovirus receptor	N120	Hex(6)HexNAc(6)Fuc(1)NeuAc(1)	N-terminus
P15151	Poliovirus receptor	N120	Hex(6)HexNAc(6)Fuc(1)NeuAc(2)	N-terminus
P15151	Poliovirus receptor	N120	Hex(6)HexNAc(6)Fuc(1)NeuAc(3)	N-terminus
P15151	Poliovirus receptor	N120	Hex(6)HexNAc(6)Fuc(2)	N-terminus
P15151	Poliovirus receptor	N120	Hex(6)HexNAc(6)Fuc(2)NeuAc(1)	N-terminus
P15151	Poliovirus receptor	N120	Hex(6)HexNAc(6)Fuc(2)NeuAc(2)	N-terminus
P15151	Poliovirus receptor	N120	Hex(6)HexNAc(6)Fuc(3)	N-terminus
P15151	Poliovirus receptor	N120	Hex(6)HexNAc(6)Fuc(3)NeuAc(1)	N-terminus
P15151	Poliovirus receptor	N120	Hex(6)HexNAc(6)Fuc(4)	N-terminus
P15151	Poliovirus receptor	N120	Hex(6)HexNAc(6)Fuc(4)NeuAc(1)	N-terminus
P15151	Poliovirus receptor	N120	Hex(6)HexNAc(6)NeuAc(1)	N-terminus
P15151	Poliovirus receptor	N218	Hex(4)HexNAc(5)	N-terminus
P15151	Poliovirus receptor	N218	Hex(4)HexNAc(5)Fuc(1)	N-terminus
P15151	Poliovirus receptor	N218	Hex(4)HexNAc(5)NeuAc(1)	N-terminus
P15151	Poliovirus receptor	N218	Hex(5)HexNAc(5)	N-terminus
P15151	Poliovirus receptor	N218	Hex(5)HexNAc(6)	N-terminus
P15151	Poliovirus receptor	N218	Hex(5)HexNAc(6)Fuc(3)NeuAc(2)	N-terminus
P15151	Poliovirus receptor	N218	Hex(6)HexNAc(6)	N-terminus
P15328	Folate receptor alpha	N69	Hex(3)HexNAc(5)Fuc(1)	N-terminus
P15328	Folate receptor alpha	N69	Hex(4)HexNAc(3)Fuc(1)NeuAc(1)	N-terminus
P15328	Folate receptor alpha	N69	Hex(4)HexNAc(4)Fuc(1)	N-terminus
P15328	Folate receptor alpha	N69	Hex(4)HexNAc(4)NeuAc(1)	N-terminus
P15328	Folate receptor alpha	N69	Hex(4)HexNAc(5)Fuc(1)	N-terminus
P15328	Folate receptor alpha	N69	Hex(4)HexNAc(5)Fuc(1)NeuAc(1)	N-terminus
P15328	Folate receptor alpha	N69	Hex(4)HexNAc(5)Fuc(2)	N-terminus
P15328	Folate receptor alpha	N69	Hex(5)HexNAc(2)	N-terminus
P15328	Folate receptor alpha	N69	Hex(5)HexNAc(3)Fuc(1)NeuAc(1)	N-terminus
P15328	Folate receptor alpha	N69	Hex(5)HexNAc(4)	N-terminus
P15328	Folate receptor alpha	N69	Hex(5)HexNAc(4)Fuc(1)	N-terminus
P15328	Folate receptor alpha	N69	Hex(5)HexNAc(4)Fuc(1)NeuAc(1)	N-terminus
P15328	Folate receptor alpha	N69	Hex(5)HexNAc(4)Fuc(2)	N-terminus
P15328	Folate receptor alpha	N69	Hex(5)HexNAc(4)Fuc(2)NeuAc(1)	N-terminus
P15328	Folate receptor alpha	N69	Hex(5)HexNAc(4)Fuc(3)NeuAc(1)	N-terminus
P15328	Folate receptor alpha	N69	Hex(5)HexNAc(5)Fuc(1)	N-terminus
P15328	Folate receptor alpha	N69	Hex(5)HexNAc(5)Fuc(1)NeuAc(1)	N-terminus
P15328	Folate receptor alpha	N69	Hex(5)HexNAc(5)Fuc(1)NeuAc(2)	N-terminus
P15328	Folate receptor alpha	N69	Hex(5)HexNAc(5)Fuc(2)	N-terminus
P15328	Folate receptor alpha	N69	Hex(5)HexNAc(5)Fuc(2)NeuAc(1)	N-terminus
P15328	Folate receptor alpha	N69	Hex(5)HexNAc(5)Fuc(3)	N-terminus
P15328	Folate receptor alpha	N69	Hex(5)HexNAc(5)Fuc(3)NeuAc(1)	N-terminus
P15328	Folate receptor alpha	N69	Hex(5)HexNAc(5)Fuc(4)	N-terminus
P15328	Folate receptor alpha	N69	Hex(5)HexNAc(6)	N-terminus
P15328	Folate receptor alpha	N69	Hex(5)HexNAc(6)Fuc(1)	N-terminus
P15328	Folate receptor alpha	N69	Hex(6)HexNAc(4)	N-terminus
P15328	Folate receptor alpha	N69	Hex(6)HexNAc(4)Fuc(1)	N-terminus
P15328	Folate receptor alpha	N69	Hex(6)HexNAc(4)Fuc(1)NeuAc(1)	N-terminus
P15328	Folate receptor alpha	N69	Hex(6)HexNAc(4)Fuc(2)	N-terminus
P15328	Folate receptor alpha	N69	Hex(6)HexNAc(5)Fuc(1)NeuAc(1)	N-terminus
P15328	Folate receptor alpha	N69	Hex(6)HexNAc(5)Fuc(4)	N-terminus
P15328	Folate receptor alpha	N69	Hex(6)HexNAc(5)NeuAc(2)	N-terminus
P15328	Folate receptor alpha	N69	Hex(6)HexNAc(6)Fuc(1)	N-terminus
P15328	Folate receptor alpha	N69	Hex(6)HexNAc(6)Fuc(1)NeuAc(1)	N-terminus
P15328	Folate receptor alpha	N69	Hex(6)HexNAc(6)Fuc(1)NeuAc(2)	N-terminus
P15328	Folate receptor alpha	N69	Hex(6)HexNAc(6)Fuc(2)	N-terminus
P15328	Folate receptor alpha	N69	Hex(6)HexNAc(6)Fuc(2)NeuAc(1)	N-terminus
P15328	Folate receptor alpha	N69	Hex(6)HexNAc(6)Fuc(2)NeuAc(2)	N-terminus
P15328	Folate receptor alpha	N69	Hex(6)HexNAc(6)Fuc(3)	N-terminus
P15328	Folate receptor alpha	N69	Hex(6)HexNAc(6)Fuc(3)NeuAc(1)	N-terminus
P15328	Folate receptor alpha	N69	Hex(6)HexNAc(6)Fuc(4)	N-terminus
P15328	Folate receptor alpha	N69	Hex(6)HexNAc(7)Fuc(2)	N-terminus
P15328	Folate receptor alpha	N69	Hex(7)HexNAc(4)	N-terminus
P15328	Folate receptor alpha	N69	Hex(7)HexNAc(4)Fuc(1)	N-terminus
P15328	Folate receptor alpha	N69	Hex(7)HexNAc(4)Fuc(1)NeuAc(1)	N-terminus
P15328	Folate receptor alpha	N69	Hex(7)HexNAc(7)Fuc(1)NeuAc(1)	N-terminus
P15328	Folate receptor alpha	N69	Hex(7)HexNAc(7)Fuc(2)	N-terminus
P15328	Folate receptor alpha	N69	Hex(7)HexNAc(7)Fuc(2)NeuAc(1)	N-terminus
P15328	Folate receptor alpha	N69	Hex(7)HexNAc(7)Fuc(4)	N-terminus
P15328	Folate receptor alpha	N69	Hex(9)HexNAc(2)	N-terminus
P15328	Folate receptor alpha	N69	Hex(10)HexNAc(2)	N-terminus
P15328	Folate receptor alpha	N161	Hex(5)HexNAc(5)	N-terminus
P15328	Folate receptor alpha	N161	Hex(5)HexNAc(5)Fuc(1)	N-terminus
P15328	Folate receptor alpha	N161	Hex(5)HexNAc(5)Fuc(1)NeuAc(1)	N-terminus
P15328	Folate receptor alpha	N161	Hex(5)HexNAc(5)Fuc(1)NeuAc(2)	N-terminus
P15328	Folate receptor alpha	N161	Hex(5)HexNAc(5)Fuc(2)	N-terminus
P15328	Folate receptor alpha	N161	Hex(5)HexNAc(5)Fuc(2)NeuAc(1)	N-terminus
P15328	Folate receptor alpha	N161	Hex(5)HexNAc(5)Fuc(3)	N-terminus
P15328	Folate receptor alpha	N161	Hex(5)HexNAc(5)NeuAc(1)	N-terminus
P15328	Folate receptor alpha	N161	Hex(5)HexNAc(5)NeuAc(2)	N-terminus
P15328	Folate receptor alpha	N161	Hex(6)HexNAc(5)Fuc(2)	N-terminus
P15328	Folate receptor alpha	N161	Hex(6)HexNAc(5)Fuc(2)NeuAc(1)	N-terminus
P15328	Folate receptor alpha	N161	Hex(6)HexNAc(5)Fuc(3)	N-terminus
P15328	Folate receptor alpha	N161	Hex(10)HexNAc(2)	N-terminus
P15328	Folate receptor alpha	N201	Hex(10)HexNAc(2)	N-terminus
P15328	Folate receptor alpha	N201	Hex(4)HexNAc(5)Fuc(1)NeuAc(1)	N-terminus
P15328	Folate receptor alpha	N201	Hex(5)HexNAc(4)Fuc(1)	N-terminus
P15328	Folate receptor alpha	N201	Hex(5)HexNAc(5)Fuc(1)NeuAc(2)	N-terminus
P15328	Folate receptor alpha	N201	Hex(5)HexNAc(5)Fuc(2)	N-terminus
P15328	Folate receptor alpha	N201	Hex(5)HexNAc(5)Fuc(2)NeuAc(1)	N-terminus
P16422	Epithelial cell adhesion molecule	N111	Hex(4)HexNAc(6)Fuc(3)	N-terminus
P16422	Epithelial cell adhesion molecule	N111	Hex(4)HexNAc(7)Fuc(1)NeuAc(1)	N-terminus
P16422	Epithelial cell adhesion molecule	N111	Hex(5)HexNAc(2)	N-terminus
P16422	Epithelial cell adhesion molecule	N111	Hex(5)HexNAc(4)	N-terminus
P16422	Epithelial cell adhesion molecule	N111	Hex(5)HexNAc(7)Fuc(2)	N-terminus
P16422	Epithelial cell adhesion molecule	N111	Hex(5)HexNAc(7)NeuAc(1)	N-terminus
P16422	Epithelial cell adhesion molecule	N111	Hex(6)HexNAc(2)	N-terminus
P16422	Epithelial cell adhesion molecule	N111	Hex(6)HexNAc(3)	N-terminus
P16422	Epithelial cell adhesion molecule	N111	Hex(7)HexNAc(2)	N-terminus
P16422	Epithelial cell adhesion molecule	N111	Hex(7)HexNAc(4)Fuc(2)NeuAc(1)	N-terminus
P16422	Epithelial cell adhesion molecule	N111	Hex(8)HexNAc(2)	N-terminus
P16422	Epithelial cell adhesion molecule	N111	Hex(9)HexNAc(2)	N-terminus
P16444	Dipeptidase 1	N57	Hex(4)HexNAc(5)Fuc(1)	Extracellular
P16444	Dipeptidase 1	N57	Hex(4)HexNAc(5)Fuc(1)NeuAc(1)	Extracellular
P16444	Dipeptidase 1	N57	Hex(5)HexNAc(5)Fuc(1)	Extracellular
P16444	Dipeptidase 1	N57	Hex(6)HexNAc(6)Fuc(1)NeuAc(1)	Extracellular
P16444	Dipeptidase 1	N57	Hex(6)HexNAc(6)Fuc(1)NeuAc(2)	Extracellular
P16444	Dipeptidase 1	N57	Hex(8)HexNAc(2)	Extracellular
P16444	Dipeptidase 1	N279	Hex(5)HexNAc(4)Fuc(1)NeuAc(1)	Extracellular
P16444	Dipeptidase 1	N279	Hex(5)HexNAc(5)Fuc(1)	Extracellular
P16444	Dipeptidase 1	N279	Hex(6)HexNAc(5)Fuc(1)NeuAc(2)	Extracellular
P16444	Dipeptidase 1	N279	Hex(6)HexNAc(5)Fuc(2)NeuAc(1)	Extracellular
P16444	Dipeptidase 1	N279	Hex(6)HexNAc(6)Fuc(1)	Extracellular
P16444	Dipeptidase 1	N358	Hex(5)HexNAc(5)Fuc(1)NeuAc(1)	Extracellular
P17301	Integrin alpha-2	N112	Hex(9)HexNAc(2)	N-terminus
P17301	Integrin alpha-2	N343	Hex(5)HexNAc(5)NeuAc(2)	N-terminus
P17301	Integrin alpha-2	N1074	Hex(6)HexNAc(3)NeuAc(1)	N-terminus
P17301	Integrin alpha-2	N1074	Hex(7)HexNAc(2)	N-terminus
P17301	Integrin alpha-2	N1074	Hex(8)HexNAc(2)	N-terminus
P19075	Tetraspanin-8	N118	Hex(4)HexNAc(5)Fuc(1)	Loop
P19075	Tetraspanin-8	N118	Hex(5)HexNAc(5)Fuc(1)NeuAc(1)	Loop
P19075	Tetraspanin-8	N118	Hex(5)HexNAc(5)Fuc(1)NeuAc(2)	Loop
P19075	Tetraspanin-8	N118	Hex(5)HexNAc(6)Fuc(1)NeuAc(2)	Loop
P19075	Tetraspanin-8	N118	Hex(6)HexNAc(6)Fuc(1)NeuAc(2)	Loop
P19075	Tetraspanin-8	N118	Hex(6)HexNAc(6)Fuc(2)NeuAc(1)	Loop
P19075	Tetraspanin-8	N118	Hex(7)HexNAc(2)	Loop
P19075	Tetraspanin-8	N118	Hex(8)HexNAc(2)	Loop
P19075	Tetraspanin-8	N118	Hex(9)HexNAc(2)	Loop
P21860	Receptor tyrosine-protein kinase erbB-3	N250	Hex(5)HexNAc(3)NeuAc(1)	N-terminus
P21860	Receptor tyrosine-protein kinase erbB-3	N250	Hex(5)HexNAc(4)NeuAc(2)	N-terminus
P21860	Receptor tyrosine-protein kinase erbB-3	N250	Hex(6)HexNAc(2)	N-terminus
P21860	Receptor tyrosine-protein kinase erbB-3	N250	Hex(6)HexNAc(3)NeuAc(1)	N-terminus
P21860	Receptor tyrosine-protein kinase erbB-3	N250	Hex(7)HexNAc(2)	N-terminus
P21860	Receptor tyrosine-protein kinase erbB-3	N250	Hex(8)HexNAc(2)	N-terminus
P21860	Receptor tyrosine-protein kinase erbB-3	N250	Hex(9)HexNAc(2)	N-terminus
P21860	Receptor tyrosine-protein kinase erbB-3	N353	Hex(5)HexNAc(4)Fuc(1)NeuAc(1)	N-terminus
P21860	Receptor tyrosine-protein kinase erbB-3	N353	Hex(5)HexNAc(5)Fuc(1)NeuAc(1)	N-terminus
P21860	Receptor tyrosine-protein kinase erbB-3	N353	Hex(7)HexNAc(2)	N-terminus
P21860	Receptor tyrosine-protein kinase erbB-3	N353	Hex(9)HexNAc(2)	N-terminus
P21860	Receptor tyrosine-protein kinase erbB-3	N437	Hex(5)HexNAc(5)NeuAc(1)	N-terminus
P21860	Receptor tyrosine-protein kinase erbB-3	N437	Hex(5)HexNAc(5)NeuAc(2)	N-terminus
P23229	Integrin alpha-6	N323	Hex(6)HexNAc(2)	N-terminus
P23229	Integrin alpha-6	N323	Hex(8)HexNAc(2)	N-terminus
P23229	Integrin alpha-6	N409	Hex(9)HexNAc(2)	N-terminus
P23229	Integrin alpha-6	N770	Hex(5)HexNAc(4)Fuc(1)NeuAc(1)	N-terminus
P23229	Integrin alpha-6	N966	Hex(6)HexNAc(2)	N-terminus
P23229	Integrin alpha-6	N966	Hex(6)HexNAc(3)NeuAc(1)	N-terminus
P23229	Integrin alpha-6	N997	Hex(9)HexNAc(2)	N-terminus
P23470	Receptor-type tyrosine-protein phosphatase gamma	N156	Hex(5)HexNAc(5)Fuc(1)NeuAc(1)	N-terminus
P25092	Heat-stable enterotoxin receptor	N345	Hex(8)HexNAc(2)	N-terminus
P25092	Heat-stable enterotoxin receptor	N345	Hex(9)HexNAc(2)	N-terminus
P25092	Heat-stable enterotoxin receptor	N402	Hex(8)HexNAc(2)	N-terminus
P25092	Heat-stable enterotoxin receptor	N402	Hex(9)HexNAc(2)	N-terminus
P25092	Heat-stable enterotoxin receptor	N402	Hex(10)HexNAc(2)	N-terminus
P26006	Integrin alpha-3	N265	Hex(5)HexNAc(5)	N-terminus
P26006	Integrin alpha-3	N605	Hex(8)HexNAc(2)	N-terminus
P26006	Integrin alpha-3	N935	Hex(9)HexNAc(2)	N-terminus
P26927	Hepatocyte growth factor-like protein	N296	Hex(9)HexNAc(2)	Extracellular
P26927	Hepatocyte growth factor-like protein	N615	Hex(7)HexNAc(2)	Extracellular
P26927	Hepatocyte growth factor-like protein	N615	Hex(8)HexNAc(2)	Extracellular
P26927	Hepatocyte growth factor-like protein	N615	Hex(9)HexNAc(2)	Extracellular
P26927	Hepatocyte growth factor-like protein	N615	Hex(10)HexNAc(2)	Extracellular
P27487	Dipeptidyl peptidase 4	N150	Hex(5)HexNAc(4)Fuc(1)NeuAc(2)	C-terminus
P27487	Dipeptidyl peptidase 4	N150	Hex(5)HexNAc(5)Fuc(1)	C-terminus
P27487	Dipeptidyl peptidase 4	N150	Hex(5)HexNAc(5)Fuc(1)NeuAc(1)	C-terminus
P27487	Dipeptidyl peptidase 4	N150	Hex(5)HexNAc(5)Fuc(1)NeuAc(2)	C-terminus
P27487	Dipeptidyl peptidase 4	N150	Hex(5)HexNAc(5)Fuc(2)NeuAc(1)	C-terminus
P27487	Dipeptidyl peptidase 4	N150	Hex(5)HexNAc(5)Fuc(3)	C-terminus
P27487	Dipeptidyl peptidase 4	N150	Hex(5)HexNAc(5)NeuAc(2)	C-terminus
P27487	Dipeptidyl peptidase 4	N150	Hex(6)HexNAc(5)Fuc(1)NeuAc(1)	C-terminus
P27487	Dipeptidyl peptidase 4	N150	Hex(6)HexNAc(5)Fuc(1)NeuAc(2)	C-terminus
P27487	Dipeptidyl peptidase 4	N150	Hex(6)HexNAc(5)Fuc(1)NeuAc(3)	C-terminus
P27487	Dipeptidyl peptidase 4	N150	Hex(6)HexNAc(5)Fuc(2)NeuAc(1)	C-terminus
P27487	Dipeptidyl peptidase 4	N150	Hex(6)HexNAc(5)Fuc(2)NeuAc(2)	C-terminus
P27487	Dipeptidyl peptidase 4	N150	Hex(6)HexNAc(5)Fuc(3)NeuAc(1)	C-terminus
P27487	Dipeptidyl peptidase 4	N150	Hex(6)HexNAc(5)Fuc(4)	C-terminus
P27487	Dipeptidyl peptidase 4	N150	Hex(6)HexNAc(5)Fuc(4)NeuAc(1)	C-terminus
P27487	Dipeptidyl peptidase 4	N150	Hex(6)HexNAc(5)NeuAc(2)	C-terminus
P27487	Dipeptidyl peptidase 4	N150	Hex(6)HexNAc(6)Fuc(1)NeuAc(1)	C-terminus
P27487	Dipeptidyl peptidase 4	N150	Hex(6)HexNAc(6)Fuc(1)NeuAc(2)	C-terminus
P27487	Dipeptidyl peptidase 4	N150	Hex(6)HexNAc(6)Fuc(1)NeuAc(3)	C-terminus
P27487	Dipeptidyl peptidase 4	N150	Hex(6)HexNAc(6)Fuc(2)	C-terminus
P27487	Dipeptidyl peptidase 4	N150	Hex(6)HexNAc(6)Fuc(2)NeuAc(1)	C-terminus
P27487	Dipeptidyl peptidase 4	N150	Hex(6)HexNAc(6)Fuc(2)NeuAc(2)	C-terminus
P27487	Dipeptidyl peptidase 4	N150	Hex(6)HexNAc(6)Fuc(2)NeuAc(3)	C-terminus
P27487	Dipeptidyl peptidase 4	N150	Hex(6)HexNAc(6)Fuc(3)NeuAc(1)	C-terminus
P27487	Dipeptidyl peptidase 4	N150	Hex(6)HexNAc(6)Fuc(3)NeuAc(2)	C-terminus
P27487	Dipeptidyl peptidase 4	N150	Hex(6)HexNAc(6)Fuc(5)NeuAc(1)	C-terminus
P27487	Dipeptidyl peptidase 4	N150	Hex(6)HexNAc(6)Fuc(5)NeuAc(3)	C-terminus
P27487	Dipeptidyl peptidase 4	N150	Hex(6)HexNAc(6)NeuAc(1)	C-terminus
P27487	Dipeptidyl peptidase 4	N150	Hex(6)HexNAc(6)NeuAc(2)	C-terminus
P27487	Dipeptidyl peptidase 4	N150	Hex(6)HexNAc(7)Fuc(1)NeuAc(2)	C-terminus
P27487	Dipeptidyl peptidase 4	N150	Hex(6)HexNAc(7)Fuc(1)NeuAc(3)	C-terminus
P27487	Dipeptidyl peptidase 4	N150	Hex(6)HexNAc(7)Fuc(3)NeuAc(2)	C-terminus
P27487	Dipeptidyl peptidase 4	N150	Hex(6)HexNAc(7)NeuAc(3)	C-terminus
P27487	Dipeptidyl peptidase 4	N150	Hex(7)HexNAc(6)Fuc(1)NeuAc(3)	C-terminus
P27487	Dipeptidyl peptidase 4	N150	Hex(7)HexNAc(6)Fuc(2)NeuAc(1)	C-terminus
P27487	Dipeptidyl peptidase 4	N150	Hex(7)HexNAc(6)Fuc(2)NeuAc(2)	C-terminus
P27487	Dipeptidyl peptidase 4	N150	Hex(7)HexNAc(6)Fuc(2)NeuAc(3)	C-terminus
P27487	Dipeptidyl peptidase 4	N150	Hex(7)HexNAc(6)Fuc(3)NeuAc(1)	C-terminus
P27487	Dipeptidyl peptidase 4	N150	Hex(7)HexNAc(6)Fuc(3)NeuAc(2)	C-terminus
P27487	Dipeptidyl peptidase 4	N150	Hex(7)HexNAc(6)Fuc(4)NeuAc(1)	C-terminus
P27487	Dipeptidyl peptidase 4	N150	Hex(7)HexNAc(6)Fuc(5)	C-terminus
P27487	Dipeptidyl peptidase 4	N150	Hex(7)HexNAc(7)Fuc(1)NeuAc(2)	C-terminus
P27487	Dipeptidyl peptidase 4	N150	Hex(7)HexNAc(7)Fuc(2)NeuAc(1)	C-terminus
P27487	Dipeptidyl peptidase 4	N150	Hex(7)HexNAc(7)Fuc(2)NeuAc(2)	C-terminus
P27487	Dipeptidyl peptidase 4	N150	Hex(7)HexNAc(7)Fuc(3)NeuAc(1)	C-terminus
P27487	Dipeptidyl peptidase 4	N150	Hex(7)HexNAc(7)Fuc(5)NeuAc(1)	C-terminus
P27487	Dipeptidyl peptidase 4	N150	Hex(7)HexNAc(7)NeuAc(2)	C-terminus
P27487	Dipeptidyl peptidase 4	N150	Hex(8)HexNAc(2)	C-terminus
P27487	Dipeptidyl peptidase 4	N150	Hex(9)HexNAc(2)	C-terminus
P27487	Dipeptidyl peptidase 4	N150	Hex(10)HexNAc(2)	C-terminus
P27487	Dipeptidyl peptidase 4	N321	Hex(4)HexNAc(4)Fuc(2)NeuAc(1)	C-terminus
P27487	Dipeptidyl peptidase 4	N321	Hex(5)HexNAc(3)NeuAc(1)	C-terminus
P27487	Dipeptidyl peptidase 4	N321	Hex(5)HexNAc(4)Fuc(2)NeuAc(1)	C-terminus
P27487	Dipeptidyl peptidase 4	N321	Hex(5)HexNAc(4)NeuAc(1)	C-terminus
P27487	Dipeptidyl peptidase 4	N321	Hex(5)HexNAc(4)NeuAc(2)	C-terminus
P27487	Dipeptidyl peptidase 4	N321	Hex(5)HexNAc(5)Fuc(1)NeuAc(1)	C-terminus
P27487	Dipeptidyl peptidase 4	N321	Hex(5)HexNAc(5)NeuAc(1)	C-terminus
P27487	Dipeptidyl peptidase 4	N321	Hex(5)HexNAc(5)NeuAc(2)	C-terminus
P27487	Dipeptidyl peptidase 4	N321	Hex(6)HexNAc(3)	C-terminus
P27487	Dipeptidyl peptidase 4	N321	Hex(6)HexNAc(3)Fuc(1)	C-terminus
P27487	Dipeptidyl peptidase 4	N321	Hex(6)HexNAc(3)Fuc(2)	C-terminus
P27487	Dipeptidyl peptidase 4	N321	Hex(6)HexNAc(3)NeuAc(1)	C-terminus
P27487	Dipeptidyl peptidase 4	N321	Hex(6)HexNAc(4)Fuc(1)	C-terminus
P27487	Dipeptidyl peptidase 4	N321	Hex(6)HexNAc(4)Fuc(1)NeuAc(1)	C-terminus
P27487	Dipeptidyl peptidase 4	N321	Hex(6)HexNAc(4)Fuc(3)	C-terminus
P27487	Dipeptidyl peptidase 4	N321	Hex(6)HexNAc(4)NeuAc(1)	C-terminus
P27487	Dipeptidyl peptidase 4	N321	Hex(6)HexNAc(5)Fuc(1)	C-terminus
P27487	Dipeptidyl peptidase 4	N321	Hex(6)HexNAc(5)Fuc(2)	C-terminus
P27487	Dipeptidyl peptidase 4	N321	Hex(7)HexNAc(4)Fuc(1)	C-terminus
P27487	Dipeptidyl peptidase 4	N321	Hex(7)HexNAc(4)NeuAc(1)	C-terminus
P27487	Dipeptidyl peptidase 4	N520	Hex(3)HexNAc(6)Fuc(3)	C-terminus
P27487	Dipeptidyl peptidase 4	N520	Hex(4)HexNAc(3)Fuc(1)NeuAc(1)	C-terminus
P27487	Dipeptidyl peptidase 4	N520	Hex(4)HexNAc(5)Fuc(1)NeuAc(1)	C-terminus
P27487	Dipeptidyl peptidase 4	N520	Hex(4)HexNAc(7)Fuc(3)NeuAc(1)	C-terminus
P27487	Dipeptidyl peptidase 4	N520	Hex(5)HexNAc(3)Fuc(1)	C-terminus
P27487	Dipeptidyl peptidase 4	N520	Hex(5)HexNAc(3)Fuc(1)NeuAc(1)	C-terminus
P27487	Dipeptidyl peptidase 4	N520	Hex(5)HexNAc(4)Fuc(1)	C-terminus
P27487	Dipeptidyl peptidase 4	N520	Hex(5)HexNAc(4)Fuc(1)NeuAc(1)	C-terminus
P27487	Dipeptidyl peptidase 4	N520	Hex(5)HexNAc(4)Fuc(1)NeuAc(2)	C-terminus
P27487	Dipeptidyl peptidase 4	N520	Hex(5)HexNAc(4)Fuc(2)	C-terminus
P27487	Dipeptidyl peptidase 4	N520	Hex(5)HexNAc(4)Fuc(2)NeuAc(1)	C-terminus
P27487	Dipeptidyl peptidase 4	N520	Hex(5)HexNAc(4)Fuc(3)	C-terminus
P27487	Dipeptidyl peptidase 4	N520	Hex(5)HexNAc(4)Fuc(3)NeuAc(1)	C-terminus
P27487	Dipeptidyl peptidase 4	N520	Hex(5)HexNAc(5)Fuc(1)	C-terminus
P27487	Dipeptidyl peptidase 4	N520	Hex(5)HexNAc(5)Fuc(1)NeuAc(1)	C-terminus
P27487	Dipeptidyl peptidase 4	N520	Hex(5)HexNAc(5)Fuc(1)NeuAc(2)	C-terminus
P27487	Dipeptidyl peptidase 4	N520	Hex(5)HexNAc(5)Fuc(2)	C-terminus
P27487	Dipeptidyl peptidase 4	N520	Hex(5)HexNAc(5)Fuc(2)NeuAc(1)	C-terminus
P27487	Dipeptidyl peptidase 4	N520	Hex(5)HexNAc(5)Fuc(3)	C-terminus
P27487	Dipeptidyl peptidase 4	N520	Hex(5)HexNAc(5)Fuc(3)NeuAc(1)	C-terminus
P27487	Dipeptidyl peptidase 4	N520	Hex(5)HexNAc(5)Fuc(4)	C-terminus
P27487	Dipeptidyl peptidase 4	N520	Hex(5)HexNAc(5)NeuAc(2)	C-terminus
P27487	Dipeptidyl peptidase 4	N520	Hex(6)HexNAc(2)	C-terminus
P27487	Dipeptidyl peptidase 4	N520	Hex(6)HexNAc(3)	C-terminus
P27487	Dipeptidyl peptidase 4	N520	Hex(6)HexNAc(3)Fuc(1)	C-terminus
P27487	Dipeptidyl peptidase 4	N520	Hex(6)HexNAc(3)Fuc(1)NeuAc(1)	C-terminus
P27487	Dipeptidyl peptidase 4	N520	Hex(6)HexNAc(3)Fuc(2)	C-terminus
P27487	Dipeptidyl peptidase 4	N520	Hex(6)HexNAc(3)NeuAc(1)	C-terminus
P27487	Dipeptidyl peptidase 4	N520	Hex(6)HexNAc(4)Fuc(1)	C-terminus
P27487	Dipeptidyl peptidase 4	N520	Hex(6)HexNAc(4)Fuc(1)NeuAc(1)	C-terminus
P27487	Dipeptidyl peptidase 4	N520	Hex(6)HexNAc(4)Fuc(2)	C-terminus
P27487	Dipeptidyl peptidase 4	N520	Hex(6)HexNAc(5)Fuc(1)NeuAc(1)	C-terminus
P27487	Dipeptidyl peptidase 4	N520	Hex(6)HexNAc(5)Fuc(1)NeuAc(2)	C-terminus
P27487	Dipeptidyl peptidase 4	N520	Hex(6)HexNAc(5)Fuc(2)NeuAc(1)	C-terminus
P27487	Dipeptidyl peptidase 4	N520	Hex(6)HexNAc(5)Fuc(3)	C-terminus
P27487	Dipeptidyl peptidase 4	N520	Hex(6)HexNAc(6)Fuc(1)NeuAc(3)	C-terminus
P27487	Dipeptidyl peptidase 4	N520	Hex(7)HexNAc(4)	C-terminus
P27487	Dipeptidyl peptidase 4	N520	Hex(7)HexNAc(4)Fuc(1)	C-terminus
P27487	Dipeptidyl peptidase 4	N520	Hex(8)HexNAc(2)	C-terminus
P27487	Dipeptidyl peptidase 4	N520	Hex(9)HexNAc(2)	C-terminus
P27487	Dipeptidyl peptidase 4	N520	Hex(10)HexNAc(2)	C-terminus
P27487	Dipeptidyl peptidase 4	N685	Hex(5)HexNAc(5)Fuc(1)NeuAc(1)	C-terminus
P27487	Dipeptidyl peptidase 4	N685	Hex(5)HexNAc(5)Fuc(1)NeuAc(2)	C-terminus
P27487	Dipeptidyl peptidase 4	N685	Hex(5)HexNAc(5)NeuAc(1)	C-terminus
P27487	Dipeptidyl peptidase 4	N685	Hex(5)HexNAc(5)NeuAc(2)	C-terminus
P27487	Dipeptidyl peptidase 4	N685	Hex(6)HexNAc(5)NeuAc(1)	C-terminus
P35613	Basigin	N160	Hex(5)HexNAc(4)Fuc(1)NeuAc(1)	N-terminus
P35613	Basigin	N160	Hex(5)HexNAc(4)Fuc(1)NeuAc(2)	N-terminus
P35613	Basigin	N160	Hex(5)HexNAc(5)Fuc(1)NeuAc(1)	N-terminus
P35613	Basigin	N160	Hex(5)HexNAc(5)Fuc(1)NeuAc(2)	N-terminus
P35613	Basigin	N160	Hex(5)HexNAc(5)Fuc(2)	N-terminus
P35613	Basigin	N160	Hex(5)HexNAc(5)Fuc(2)NeuAc(1)	N-terminus
P35613	Basigin	N160	Hex(6)HexNAc(5)Fuc(1)NeuAc(2)	N-terminus
P35613	Basigin	N160	Hex(6)HexNAc(5)Fuc(2)NeuAc(1)	N-terminus
P35613	Basigin	N160	Hex(6)HexNAc(5)Fuc(3)NeuAc(1)	N-terminus
P35613	Basigin	N160	Hex(6)HexNAc(5)Fuc(4)	N-terminus
P35613	Basigin	N160	Hex(6)HexNAc(6)Fuc(1)NeuAc(2)	N-terminus
P35613	Basigin	N160	Hex(6)HexNAc(6)Fuc(1)NeuAc(3)	N-terminus
P35613	Basigin	N160	Hex(6)HexNAc(6)Fuc(2)NeuAc(1)	N-terminus
P35613	Basigin	N160	Hex(6)HexNAc(6)Fuc(2)NeuAc(2)	N-terminus
P35613	Basigin	N160	Hex(6)HexNAc(6)Fuc(3)NeuAc(1)	N-terminus
P35613	Basigin	N160	Hex(6)HexNAc(6)NeuAc(3)	N-terminus
P35613	Basigin	N160	Hex(6)HexNAc(7)Fuc(1)NeuAc(3)	N-terminus
P35613	Basigin	N160	Hex(7)HexNAc(2)	N-terminus
P35613	Basigin	N160	Hex(7)HexNAc(6)Fuc(2)NeuAc(2)	N-terminus
P35613	Basigin	N160	Hex(7)HexNAc(7)Fuc(1)NeuAc(3)	N-terminus
P35613	Basigin	N160	Hex(8)HexNAc(2)	N-terminus
P35613	Basigin	N160	Hex(9)HexNAc(2)	N-terminus
P35613	Basigin	N160	Hex(10)HexNAc(2)	N-terminus
P35613	Basigin	N268	Hex(8)HexNAc(2)	N-terminus
P40199	Carcinoembryonic antigen-related cell adhesion molecule 6	N224	Hex(5)HexNAc(2)	Extracellular
P40199	Carcinoembryonic antigen-related cell adhesion molecule 6	N224	Hex(6)HexNAc(2)	Extracellular
P42892	Endothelin-converting enzyme 1	N166	Hex(5)HexNAc(4)Fuc(3)	C-terminus
P42892	Endothelin-converting enzyme 1	N166	Hex(5)HexNAc(5)Fuc(1)	C-terminus
P42892	Endothelin-converting enzyme 1	N166	Hex(5)HexNAc(5)Fuc(1)NeuAc(1)	C-terminus
P42892	Endothelin-converting enzyme 1	N166	Hex(5)HexNAc(5)Fuc(1)NeuAc(2)	C-terminus
P42892	Endothelin-converting enzyme 1	N166	Hex(5)HexNAc(5)Fuc(3)NeuAc(1)	C-terminus
P42892	Endothelin-converting enzyme 1	N166	Hex(6)HexNAc(6)Fuc(1)	C-terminus
P42892	Endothelin-converting enzyme 1	N166	Hex(6)HexNAc(6)Fuc(1)NeuAc(1)	C-terminus
P42892	Endothelin-converting enzyme 1	N166	Hex(7)HexNAc(2)	C-terminus
P42892	Endothelin-converting enzyme 1	N166	Hex(8)HexNAc(2)	C-terminus
P42892	Endothelin-converting enzyme 1	N166	Hex(9)HexNAc(2)	C-terminus
P42892	Endothelin-converting enzyme 1	N210	Hex(6)HexNAc(6)Fuc(1)NeuAc(2)	C-terminus
P42892	Endothelin-converting enzyme 1	N210	Hex(9)HexNAc(2)	C-terminus
P42892	Endothelin-converting enzyme 1	N270	Hex(9)HexNAc(2)	C-terminus
P43251	Biotinidase	N349	Hex(5)HexNAc(2)	Extracellular
P43251	Biotinidase	N349	Hex(6)HexNAc(2)	Extracellular
P43251	Biotinidase	N349	Hex(7)HexNAc(2)	Extracellular
P43251	Biotinidase	N349	Hex(8)HexNAc(2)	Extracellular
P50895	Basal cell adhesion molecule	N439	Hex(3)HexNAc(5)	N-terminus
P50895	Basal cell adhesion molecule	N439	Hex(3)HexNAc(5)Fuc(1)	N-terminus
P50895	Basal cell adhesion molecule	N439	Hex(4)HexNAc(3)Fuc(2)	N-terminus
P50895	Basal cell adhesion molecule	N439	Hex(4)HexNAc(3)NeuAc(1)	N-terminus
P50895	Basal cell adhesion molecule	N439	Hex(4)HexNAc(4)	N-terminus
P50895	Basal cell adhesion molecule	N439	Hex(4)HexNAc(4)Fuc(3)NeuAc(1)	N-terminus
P50895	Basal cell adhesion molecule	N439	Hex(4)HexNAc(5)	N-terminus
P50895	Basal cell adhesion molecule	N439	Hex(4)HexNAc(5)Fuc(1)	N-terminus
P50895	Basal cell adhesion molecule	N439	Hex(4)HexNAc(5)NeuAc(1)	N-terminus
P50895	Basal cell adhesion molecule	N439	Hex(5)HexNAc(2)	N-terminus
P50895	Basal cell adhesion molecule	N439	Hex(5)HexNAc(3)NeuAc(1)	N-terminus
P50895	Basal cell adhesion molecule	N439	Hex(5)HexNAc(4)	N-terminus
P50895	Basal cell adhesion molecule	N439	Hex(5)HexNAc(4)NeuAc(1)	N-terminus
P50895	Basal cell adhesion molecule	N439	Hex(5)HexNAc(5)	N-terminus
P50895	Basal cell adhesion molecule	N439	Hex(5)HexNAc(5)Fuc(1)	N-terminus
P50895	Basal cell adhesion molecule	N439	Hex(5)HexNAc(5)Fuc(1)NeuAc(1)	N-terminus
P50895	Basal cell adhesion molecule	N439	Hex(5)HexNAc(5)Fuc(2)NeuAc(1)	N-terminus
P50895	Basal cell adhesion molecule	N439	Hex(5)HexNAc(5)NeuAc(1)	N-terminus
P50895	Basal cell adhesion molecule	N439	Hex(5)HexNAc(5)NeuAc(1)	N-terminus
P50895	Basal cell adhesion molecule	N439	Hex(5)HexNAc(5)NeuAc(2)	N-terminus
P50895	Basal cell adhesion molecule	N439	Hex(5)HexNAc(6)	N-terminus
P50895	Basal cell adhesion molecule	N439	Hex(5)HexNAc(6)Fuc(1)	N-terminus
P50895	Basal cell adhesion molecule	N439	Hex(5)HexNAc(6)NeuAc(2)	N-terminus
P50895	Basal cell adhesion molecule	N439	Hex(6)HexNAc(3)	N-terminus
P50895	Basal cell adhesion molecule	N439	Hex(6)HexNAc(3)NeuAc(1)	N-terminus
P50895	Basal cell adhesion molecule	N439	Hex(6)HexNAc(4)	N-terminus
P50895	Basal cell adhesion molecule	N439	Hex(6)HexNAc(6)	N-terminus
P50895	Basal cell adhesion molecule	N439	Hex(6)HexNAc(6)Fuc(1)	N-terminus
P50895	Basal cell adhesion molecule	N439	Hex(6)HexNAc(6)Fuc(1)NeuAc(1)	N-terminus
P50895	Basal cell adhesion molecule	N439	Hex(6)HexNAc(6)NeuAc(1)	N-terminus
P50895	Basal cell adhesion molecule	N439	Hex(7)HexNAc(2)	N-terminus
P50895	Basal cell adhesion molecule	N439	Hex(8)HexNAc(2)	N-terminus
P50895	Basal cell adhesion molecule	N439	Hex(9)HexNAc(2)	N-terminus
P50895	Basal cell adhesion molecule	N439	Hex(10)HexNAc(2)	N-terminus
P51654	Glypican-3	N124	Hex(5)HexNAc(5)Fuc(1)NeuAc(2)	Extracellular
P53801	Pituitary tumor-transforming gene 1 protein-interacting protein	N54	Hex(5)HexNAc(2)	N-terminus
P53801	Pituitary tumor-transforming gene 1 protein-interacting protein	N54	Hex(6)HexNAc(2)	N-terminus
P53801	Pituitary tumor-transforming gene 1 protein-interacting protein	N54	Hex(6)HexNAc(3)Fuc(2)	N-terminus
P53801	Pituitary tumor-transforming gene 1 protein-interacting protein	N54	Hex(6)HexNAc(3)NeuAc(1)	N-terminus
P53801	Pituitary tumor-transforming gene 1 protein-interacting protein	N54	Hex(7)HexNAc(2)	N-terminus
P53801	Pituitary tumor-transforming gene 1 protein-interacting protein	N54	Hex(8)HexNAc(2)	N-terminus
P53801	Pituitary tumor-transforming gene 1 protein-interacting protein	N54	Hex(9)HexNAc(2)	N-terminus
P55899	IgG receptor FcRn large subunit p51	N125	Hex(4)HexNAc(5)Fuc(1)NeuAc(1)	N-terminus
P55899	IgG receptor FcRn large subunit p51	N125	Hex(4)HexNAc(5)Fuc(3)	N-terminus
P55899	IgG receptor FcRn large subunit p51	N125	Hex(5)HexNAc(4)Fuc(1)NeuAc(1)	N-terminus
P55899	IgG receptor FcRn large subunit p51	N125	Hex(5)HexNAc(4)Fuc(1)NeuAc(2)	N-terminus
P55899	IgG receptor FcRn large subunit p51	N125	Hex(5)HexNAc(4)Fuc(3)NeuAc(1)	N-terminus
P55899	IgG receptor FcRn large subunit p51	N125	Hex(5)HexNAc(5)Fuc(1)	N-terminus
P55899	IgG receptor FcRn large subunit p51	N125	Hex(5)HexNAc(5)Fuc(1)NeuAc(1)	N-terminus
P55899	IgG receptor FcRn large subunit p51	N125	Hex(5)HexNAc(5)Fuc(2)	N-terminus
P55899	IgG receptor FcRn large subunit p51	N125	Hex(5)HexNAc(5)Fuc(2)NeuAc(1)	N-terminus
P55899	IgG receptor FcRn large subunit p51	N125	Hex(6)HexNAc(5)Fuc(1)NeuAc(1)	N-terminus
P55899	IgG receptor FcRn large subunit p51	N125	Hex(6)HexNAc(5)Fuc(2)	N-terminus
P55899	IgG receptor FcRn large subunit p51	N125	Hex(6)HexNAc(5)Fuc(2)NeuAc(1)	N-terminus
P55899	IgG receptor FcRn large subunit p51	N125	Hex(6)HexNAc(5)Fuc(3)	N-terminus
P55899	IgG receptor FcRn large subunit p51	N125	Hex(6)HexNAc(5)Fuc(4)	N-terminus
P55899	IgG receptor FcRn large subunit p51	N125	Hex(6)HexNAc(6)Fuc(2)NeuAc(1)	N-terminus
P55899	IgG receptor FcRn large subunit p51	N125	Hex(7)HexNAc(5)Fuc(1)NeuAc(1)	N-terminus
P56199	Integrin alpha-1	N217	Hex(5)HexNAc(5)Fuc(1)NeuAc(1)	N-terminus
P56199	Integrin alpha-1	N418	Hex(6)HexNAc(2)	N-terminus
P56199	Integrin alpha-1	N418	Hex(7)HexNAc(2)	N-terminus
P56199	Integrin alpha-1	N418	Hex(8)HexNAc(2)	N-terminus
P56199	Integrin alpha-1	N460	Hex(8)HexNAc(2)	N-terminus
P56199	Integrin alpha-1	N460	Hex(9)HexNAc(2)	N-terminus
P56199	Integrin alpha-1	N532	Hex(4)HexNAc(5)Fuc(1)NeuAc(1)	N-terminus
P56199	Integrin alpha-1	N532	Hex(5)HexNAc(5)Fuc(1)NeuAc(1)	N-terminus
P56199	Integrin alpha-1	N840	Hex(6)HexNAc(2)	N-terminus
P56199	Integrin alpha-1	N840	Hex(7)HexNAc(2)	N-terminus
P56199	Integrin alpha-1	N883	Hex(7)HexNAc(2)	N-terminus
P56199	Integrin alpha-1	N883	Hex(8)HexNAc(2)	N-terminus
P56199	Integrin alpha-1	N883	Hex(9)HexNAc(2)	N-terminus
P56199	Integrin alpha-1	N1113	Hex(6)HexNAc(2)	N-terminus
P56199	Integrin alpha-1	N1113	Hex(7)HexNAc(2)	N-terminus
P56199	Integrin alpha-1	N1113	Hex(8)HexNAc(2)	N-terminus
P56199	Integrin alpha-1	N1113	Hex(9)HexNAc(2)	N-terminus
P78310	Coxsackievirus and adenovirus receptor	N106	Hex(4)HexNAc(5)NeuAc(1)	N-terminus
P78310	Coxsackievirus and adenovirus receptor	N106	Hex(5)HexNAc(4)NeuAc(1)	N-terminus
P78310	Coxsackievirus and adenovirus receptor	N106	Hex(5)HexNAc(5)	N-terminus
P78310	Coxsackievirus and adenovirus receptor	N106	Hex(5)HexNAc(5)Fuc(1)NeuAc(1)	N-terminus
P78310	Coxsackievirus and adenovirus receptor	N106	Hex(5)HexNAc(5)NeuAc(1)	N-terminus
P78310	Coxsackievirus and adenovirus receptor	N106	Hex(5)HexNAc(5)NeuAc(2)	N-terminus
P78310	Coxsackievirus and adenovirus receptor	N106	Hex(6)HexNAc(5)Fuc(1)	N-terminus
P78310	Coxsackievirus and adenovirus receptor	N106	Hex(6)HexNAc(5)Fuc(1)NeuAc(1)	N-terminus
P78310	Coxsackievirus and adenovirus receptor	N106	Hex(6)HexNAc(5)NeuAc(1)	N-terminus
P78310	Coxsackievirus and adenovirus receptor	N201	Hex(4)HexNAc(3)Fuc(1)NeuAc(1)	N-terminus
P78324	Tyrosine-protein phosphatase non-receptor type substrate 1	N110	Hex(5)HexNAc(5)Fuc(1)NeuAc(1)	N-terminus
P78324	Tyrosine-protein phosphatase non-receptor type substrate 1	N110	Hex(5)HexNAc(5)Fuc(1)NeuAc(2)	N-terminus
P78324	Tyrosine-protein phosphatase non-receptor type substrate 1	N110	Hex(5)HexNAc(5)Fuc(3)	N-terminus
P78324	Tyrosine-protein phosphatase non-receptor type substrate 1	N270	Hex(5)HexNAc(2)	N-terminus
P78324	Tyrosine-protein phosphatase non-receptor type substrate 1	N270	Hex(6)HexNAc(2)	N-terminus
P78324	Tyrosine-protein phosphatase non-receptor type substrate 1	N270	Hex(7)HexNAc(2)	N-terminus
P78357	Contactin-associated protein 1	N843	Hex(9)HexNAc(2)	N-terminus
P78536	Disintegrin and metalloproteinase domain-containing protein 17	N103	Hex(8)HexNAc(2)	N-terminus
P78536	Disintegrin and metalloproteinase domain-containing protein 17	N157	Hex(8)HexNAc(2)	N-terminus
P78536	Disintegrin and metalloproteinase domain-containing protein 17	N157	Hex(9)HexNAc(2)	N-terminus
P78536	Disintegrin and metalloproteinase domain-containing protein 17	N174	Hex(8)HexNAc(2)	N-terminus
P78536	Disintegrin and metalloproteinase domain-containing protein 17	N264	Hex(8)HexNAc(2)	N-terminus
P78536	Disintegrin and metalloproteinase domain-containing protein 17	N539	Hex(9)HexNAc(2)	N-terminus
P78536	Disintegrin and metalloproteinase domain-containing protein 17	N594	Hex(8)HexNAc(2)	N-terminus
P98153	Integral membrane protein DGCR2/IDD	N149	Hex(8)HexNAc(2)	N-terminus
P98160	Basement membrane-specific heparan sulfate proteoglycan core protein	N1755	Hex(4)HexNAc(5)Fuc(1)NeuAc(1)	Extracellular
P98160	Basement membrane-specific heparan sulfate proteoglycan core protein	N3780	Hex(4)HexNAc(5)Fuc(1)NeuAc(1)	Extracellular
P98160	Basement membrane-specific heparan sulfate proteoglycan core protein	N3780	Hex(5)HexNAc(4)Fuc(1)NeuAc(1)	Extracellular
P98160	Basement membrane-specific heparan sulfate proteoglycan core protein	N3780	Hex(5)HexNAc(5)Fuc(1)NeuAc(1)	Extracellular
P98160	Basement membrane-specific heparan sulfate proteoglycan core protein	N3780	Hex(5)HexNAc(5)Fuc(3)	Extracellular
P98164	Low-density lipoprotein receptor-related protein 2	N1383	Hex(9)HexNAc(2)	N-terminus
P98164	Low-density lipoprotein receptor-related protein 2	N2177	Hex(8)HexNAc(2)	N-terminus
P98164	Low-density lipoprotein receptor-related protein 2	N4068	Hex(7)HexNAc(2)	N-terminus
P98164	Low-density lipoprotein receptor-related protein 2	N4068	Hex(8)HexNAc(2)	N-terminus
P98164	Low-density lipoprotein receptor-related protein 2	N4068	Hex(9)HexNAc(2)	N-terminus
Q02487	Desmocollin-2	N392	Hex(5)HexNAc(5)Fuc(1)	N-terminus
Q02487	Desmocollin-2	N392	Hex(5)HexNAc(5)Fuc(1)NeuAc(1)	N-terminus
Q02487	Desmocollin-2	N392	Hex(5)HexNAc(5)Fuc(1)NeuAc(2)	N-terminus
Q02487	Desmocollin-2	N392	Hex(5)HexNAc(5)Fuc(2)NeuAc(1)	N-terminus
Q02487	Desmocollin-2	N546	Hex(5)HexNAc(5)	N-terminus
Q02487	Desmocollin-2	N546	Hex(5)HexNAc(5)Fuc(2)	N-terminus
Q02487	Desmocollin-2	N546	Hex(5)HexNAc(5)NeuAc(1)	N-terminus
Q02487	Desmocollin-2	N546	Hex(6)HexNAc(3)NeuAc(1)	N-terminus
Q02487	Desmocollin-2	N546	Hex(6)HexNAc(4)	N-terminus
Q02487	Desmocollin-2	N629	Hex(5)HexNAc(2)	N-terminus
Q02487	Desmocollin-2	N629	Hex(5)HexNAc(4)	N-terminus
Q02487	Desmocollin-2	N629	Hex(6)HexNAc(2)	N-terminus
Q02487	Desmocollin-2	N629	Hex(6)HexNAc(3)	N-terminus
Q02487	Desmocollin-2	N629	Hex(6)HexNAc(3)NeuAc(1)	N-terminus
Q02487	Desmocollin-2	N629	Hex(6)HexNAc(4)	N-terminus
Q02487	Desmocollin-2	N629	Hex(7)HexNAc(2)	N-terminus
Q04900	Sialomucin core protein 24	N146	Hex(9)HexNAc(2)	N-terminus
Q06481	Amyloid-like protein 2	N541	Hex(8)HexNAc(2)	N-terminus
Q06481	Amyloid-like protein 2	N541	Hex(9)HexNAc(2)	N-terminus
Q07954	Prolow-density lipoprotein receptor-related protein 1	N114	Hex(8)HexNAc(2)	N-terminus
Q07954	Prolow-density lipoprotein receptor-related protein 1	N136	Hex(4)HexNAc(5)Fuc(1)	N-terminus
Q07954	Prolow-density lipoprotein receptor-related protein 1	N136	Hex(5)HexNAc(5)Fuc(1)	N-terminus
Q07954	Prolow-density lipoprotein receptor-related protein 1	N136	Hex(5)HexNAc(5)Fuc(1)NeuAc(1)	N-terminus
Q07954	Prolow-density lipoprotein receptor-related protein 1	N136	Hex(8)HexNAc(2)	N-terminus
Q07954	Prolow-density lipoprotein receptor-related protein 1	N136	Hex(9)HexNAc(2)	N-terminus
Q07954	Prolow-density lipoprotein receptor-related protein 1	N446	Hex(5)HexNAc(5)	N-terminus
Q07954	Prolow-density lipoprotein receptor-related protein 1	N446	Hex(8)HexNAc(2)	N-terminus
Q07954	Prolow-density lipoprotein receptor-related protein 1	N446	Hex(9)HexNAc(2)	N-terminus
Q07954	Prolow-density lipoprotein receptor-related protein 1	N729	Hex(5)HexNAc(5)Fuc(1)NeuAc(1)	N-terminus
Q07954	Prolow-density lipoprotein receptor-related protein 1	N729	Hex(5)HexNAc(6)Fuc(4)NeuAc(1)	N-terminus
Q07954	Prolow-density lipoprotein receptor-related protein 1	N729	Hex(8)HexNAc(2)	N-terminus
Q07954	Prolow-density lipoprotein receptor-related protein 1	N729	Hex(9)HexNAc(2)	N-terminus
Q07954	Prolow-density lipoprotein receptor-related protein 1	N928	Hex(8)HexNAc(2)	N-terminus
Q07954	Prolow-density lipoprotein receptor-related protein 1	N928	Hex(9)HexNAc(2)	N-terminus
Q07954	Prolow-density lipoprotein receptor-related protein 1	N1511	Hex(3)HexNAc(5)Fuc(1)	N-terminus
Q07954	Prolow-density lipoprotein receptor-related protein 1	N1511	Hex(4)HexNAc(5)Fuc(1)	N-terminus
Q07954	Prolow-density lipoprotein receptor-related protein 1	N1511	Hex(5)HexNAc(5)Fuc(1)	N-terminus
Q07954	Prolow-density lipoprotein receptor-related protein 1	N1511	Hex(8)HexNAc(2)	N-terminus
Q07954	Prolow-density lipoprotein receptor-related protein 1	N1511	Hex(9)HexNAc(2)	N-terminus
Q07954	Prolow-density lipoprotein receptor-related protein 1	N1511	Hex(10)HexNAc(2)	N-terminus
Q07954	Prolow-density lipoprotein receptor-related protein 1	N1575	Hex(9)HexNAc(2)	N-terminus
Q07954	Prolow-density lipoprotein receptor-related protein 1	N1763	Hex(9)HexNAc(2)	N-terminus
Q07954	Prolow-density lipoprotein receptor-related protein 1	N1825	Hex(8)HexNAc(2)	N-terminus
Q07954	Prolow-density lipoprotein receptor-related protein 1	N1995	Hex(7)HexNAc(2)	N-terminus
Q07954	Prolow-density lipoprotein receptor-related protein 1	N1995	Hex(9)HexNAc(2)	N-terminus
Q07954	Prolow-density lipoprotein receptor-related protein 1	N2127	Hex(5)HexNAc(5)Fuc(1)NeuAc(1)	N-terminus
Q07954	Prolow-density lipoprotein receptor-related protein 1	N2127	Hex(8)HexNAc(2)	N-terminus
Q07954	Prolow-density lipoprotein receptor-related protein 1	N2127	Hex(9)HexNAc(2)	N-terminus
Q07954	Prolow-density lipoprotein receptor-related protein 1	N2472	Hex(5)HexNAc(5)NeuAc(1)	N-terminus
Q07954	Prolow-density lipoprotein receptor-related protein 1	N2502	Hex(5)HexNAc(5)Fuc(1)	N-terminus
Q07954	Prolow-density lipoprotein receptor-related protein 1	N2502	Hex(6)HexNAc(5)Fuc(1)NeuAc(3)	N-terminus
Q07954	Prolow-density lipoprotein receptor-related protein 1	N2502	Hex(9)HexNAc(2)	N-terminus
Q07954	Prolow-density lipoprotein receptor-related protein 1	N2620	Hex(5)HexNAc(2)	N-terminus
Q07954	Prolow-density lipoprotein receptor-related protein 1	N2620	Hex(9)HexNAc(2)	N-terminus
Q07954	Prolow-density lipoprotein receptor-related protein 1	N2905	Hex(5)HexNAc(5)Fuc(1)	N-terminus
Q07954	Prolow-density lipoprotein receptor-related protein 1	N3048	Hex(9)HexNAc(2)	N-terminus
Q07954	Prolow-density lipoprotein receptor-related protein 1	N3048	Hex(10)HexNAc(2)	N-terminus
Q07954	Prolow-density lipoprotein receptor-related protein 1	N3089	Hex(4)HexNAc(5)Fuc(1)	N-terminus
Q07954	Prolow-density lipoprotein receptor-related protein 1	N3089	Hex(5)HexNAc(5)Fuc(1)	N-terminus
Q07954	Prolow-density lipoprotein receptor-related protein 1	N3089	Hex(8)HexNAc(2)	N-terminus
Q07954	Prolow-density lipoprotein receptor-related protein 1	N3089	Hex(4)HexNAc(5)Fuc(1)	N-terminus
Q07954	Prolow-density lipoprotein receptor-related protein 1	N3333	Hex(5)HexNAc(5)Fuc(1)	N-terminus
Q07954	Prolow-density lipoprotein receptor-related protein 1	N3333	Hex(5)HexNAc(5)Fuc(1)NeuAc(1)	N-terminus
Q07954	Prolow-density lipoprotein receptor-related protein 1	N3333	Hex(8)HexNAc(2)	N-terminus
Q07954	Prolow-density lipoprotein receptor-related protein 1	N3333	Hex(9)HexNAc(2)	N-terminus
Q07954	Prolow-density lipoprotein receptor-related protein 1	N3333	Hex(10)HexNAc(2)	N-terminus
Q07954	Prolow-density lipoprotein receptor-related protein 1	N3662	Hex(4)HexNAc(5)Fuc(1)	N-terminus
Q07954	Prolow-density lipoprotein receptor-related protein 1	N3662	Hex(4)HexNAc(6)	N-terminus
Q07954	Prolow-density lipoprotein receptor-related protein 1	N3662	Hex(5)HexNAc(5)Fuc(1)	N-terminus
Q07954	Prolow-density lipoprotein receptor-related protein 1	N3662	Hex(5)HexNAc(5)Fuc(1)NeuAc(1)	N-terminus
Q07954	Prolow-density lipoprotein receptor-related protein 1	N3662	Hex(5)HexNAc(5)Fuc(1)NeuAc(2)	N-terminus
Q07954	Prolow-density lipoprotein receptor-related protein 1	N3662	Hex(8)HexNAc(2)	N-terminus
Q07954	Prolow-density lipoprotein receptor-related protein 1	N3662	Hex(9)HexNAc(2)	N-terminus
Q07954	Prolow-density lipoprotein receptor-related protein 1	N3788	Hex(4)HexNAc(5)Fuc(1)	N-terminus
Q07954	Prolow-density lipoprotein receptor-related protein 1	N3788	Hex(5)HexNAc(5)Fuc(1)	N-terminus
Q07954	Prolow-density lipoprotein receptor-related protein 1	N3788	Hex(5)HexNAc(5)Fuc(1)NeuAc(1)	N-terminus
Q07954	Prolow-density lipoprotein receptor-related protein 1	N3788	Hex(8)HexNAc(2)	N-terminus
Q07954	Prolow-density lipoprotein receptor-related protein 1	N3788	Hex(9)HexNAc(2)	N-terminus
Q07954	Prolow-density lipoprotein receptor-related protein 1	N3788	Hex(10)HexNAc(2)	N-terminus
Q07954	Prolow-density lipoprotein receptor-related protein 1	N3839	Hex(4)HexNAc(5)Fuc(1)	N-terminus
Q07954	Prolow-density lipoprotein receptor-related protein 1	N3839	Hex(5)HexNAc(2)	N-terminus
Q07954	Prolow-density lipoprotein receptor-related protein 1	N3839	Hex(5)HexNAc(4)Fuc(1)	N-terminus
Q07954	Prolow-density lipoprotein receptor-related protein 1	N3839	Hex(8)HexNAc(2)	N-terminus
Q07954	Prolow-density lipoprotein receptor-related protein 1	N3839	Hex(9)HexNAc(2)	N-terminus
Q07954	Prolow-density lipoprotein receptor-related protein 1	N3953	Hex(4)HexNAc(5)Fuc(1)	N-terminus
Q07954	Prolow-density lipoprotein receptor-related protein 1	N3953	Hex(4)HexNAc(5)NeuAc(1)	N-terminus
Q07954	Prolow-density lipoprotein receptor-related protein 1	N3953	Hex(5)HexNAc(5)Fuc(1)	N-terminus
Q07954	Prolow-density lipoprotein receptor-related protein 1	N3953	Hex(5)HexNAc(5)Fuc(1)NeuAc(1)	N-terminus
Q07954	Prolow-density lipoprotein receptor-related protein 1	N3953	Hex(8)HexNAc(2)	N-terminus
Q07954	Prolow-density lipoprotein receptor-related protein 1	N3953	Hex(9)HexNAc(2)	N-terminus
Q07954	Prolow-density lipoprotein receptor-related protein 1	N4075	Hex(4)HexNAc(3)NeuAc(1)	N-terminus
Q07954	Prolow-density lipoprotein receptor-related protein 1	N4075	Hex(5)HexNAc(3)NeuAc(1)	N-terminus
Q07954	Prolow-density lipoprotein receptor-related protein 1	N4075	Hex(5)HexNAc(4)	N-terminus
Q07954	Prolow-density lipoprotein receptor-related protein 1	N4075	Hex(5)HexNAc(4)NeuAc(1)	N-terminus
Q07954	Prolow-density lipoprotein receptor-related protein 1	N4075	Hex(5)HexNAc(5)	N-terminus
Q07954	Prolow-density lipoprotein receptor-related protein 1	N4075	Hex(6)HexNAc(3)NeuAc(1)	N-terminus
Q07954	Prolow-density lipoprotein receptor-related protein 1	N4075	Hex(8)HexNAc(2)	N-terminus
Q07954	Prolow-density lipoprotein receptor-related protein 1	N4075	Hex(9)HexNAc(2)	N-terminus
Q08380	Galectin-3-binding protein	N69	Hex(6)HexNAc(5)Fuc(1)NeuAc(2)	Extracellular
Q08380	Galectin-3-binding protein	N69	Hex(8)HexNAc(2)	Extracellular
Q08380	Galectin-3-binding protein	N69	Hex(9)HexNAc(2)	Extracellular
Q08380	Galectin-3-binding protein	N125	Hex(8)HexNAc(2)	Extracellular
Q08380	Galectin-3-binding protein	N125	Hex(9)HexNAc(2)	Extracellular
Q08380	Galectin-3-binding protein	N398	Hex(4)HexNAc(6)Fuc(4)NeuAc(1)	Extracellular
Q08380	Galectin-3-binding protein	N398	Hex(8)HexNAc(2)	Extracellular
Q08380	Galectin-3-binding protein	N398	Hex(9)HexNAc(2)	Extracellular
Q08380	Galectin-3-binding protein	N398	Hex(10)HexNAc(2)	Extracellular
Q08380	Galectin-3-binding protein	N551	Hex(9)HexNAc(2)	Extracellular
Q08380	Galectin-3-binding protein	N580	Hex(9)HexNAc(2)	Extracellular
Q08431	Lactadherin	N238	Hex(5)HexNAc(2)	Extracellular
Q08431	Lactadherin	N238	Hex(6)HexNAc(2)	Extracellular
Q08431	Lactadherin	N238	Hex(6)HexNAc(3)NeuAc(1)	Extracellular
Q08431	Lactadherin	N238	Hex(7)HexNAc(2)	Extracellular
Q08431	Lactadherin	N238	Hex(8)HexNAc(2)	Extracellular
Q12864	Cadherin-17	N250	Hex(4)HexNAc(5)Fuc(2)	N-terminus
Q12864	Cadherin-17	N250	Hex(4)HexNAc(5)NeuAc(1)	N-terminus
Q12864	Cadherin-17	N250	Hex(5)HexNAc(4)Fuc(1)NeuAc(1)	N-terminus
Q12864	Cadherin-17	N250	Hex(5)HexNAc(4)NeuAc(1)	N-terminus
Q12864	Cadherin-17	N250	Hex(5)HexNAc(4)NeuAc(2)	N-terminus
Q12864	Cadherin-17	N250	Hex(5)HexNAc(5)NeuAc(1)	N-terminus
Q12864	Cadherin-17	N250	Hex(5)HexNAc(5)NeuAc(2)	N-terminus
Q12864	Cadherin-17	N419	Hex(4)HexNAc(5)Fuc(1)	N-terminus
Q12864	Cadherin-17	N419	Hex(4)HexNAc(5)Fuc(1)NeuAc(1)	N-terminus
Q12864	Cadherin-17	N419	Hex(5)HexNAc(5)	N-terminus
Q12864	Cadherin-17	N419	Hex(5)HexNAc(5)Fuc(1)	N-terminus
Q12864	Cadherin-17	N419	Hex(5)HexNAc(5)Fuc(1)NeuAc(1)	N-terminus
Q12864	Cadherin-17	N419	Hex(5)HexNAc(5)Fuc(1)NeuAc(2)	N-terminus
Q12864	Cadherin-17	N419	Hex(5)HexNAc(5)Fuc(2)	N-terminus
Q12864	Cadherin-17	N419	Hex(5)HexNAc(5)Fuc(2)NeuAc(1)	N-terminus
Q12864	Cadherin-17	N419	Hex(5)HexNAc(5)NeuAc(1)	N-terminus
Q12864	Cadherin-17	N419	Hex(5)HexNAc(5)NeuAc(2)	N-terminus
Q12864	Cadherin-17	N419	Hex(6)HexNAc(5)Fuc(1)NeuAc(1)	N-terminus
Q12864	Cadherin-17	N419	Hex(6)HexNAc(6)Fuc(1)NeuAc(2)	N-terminus
Q12864	Cadherin-17	N419	Hex(6)HexNAc(6)Fuc(2)	N-terminus
Q12864	Cadherin-17	N419	Hex(6)HexNAc(6)Fuc(2)NeuAc(1)	N-terminus
Q12864	Cadherin-17	N419	Hex(6)HexNAc(6)Fuc(2)NeuAc(2)	N-terminus
Q12864	Cadherin-17	N419	Hex(6)HexNAc(6)Fuc(4)	N-terminus
Q12864	Cadherin-17	N419	Hex(9)HexNAc(2)	N-terminus
Q12864	Cadherin-17	N546	Hex(4)HexNAc(4)Fuc(1)	N-terminus
Q12864	Cadherin-17	N546	Hex(4)HexNAc(5)Fuc(1)	N-terminus
Q12864	Cadherin-17	N546	Hex(4)HexNAc(5)Fuc(1)NeuAc(1)	N-terminus
Q12864	Cadherin-17	N546	Hex(5)HexNAc(4)Fuc(1)	N-terminus
Q12864	Cadherin-17	N546	Hex(5)HexNAc(4)Fuc(1)NeuAc(1)	N-terminus
Q12864	Cadherin-17	N546	Hex(5)HexNAc(4)Fuc(2)	N-terminus
Q12864	Cadherin-17	N546	Hex(5)HexNAc(4)Fuc(2)NeuAc(1)	N-terminus
Q12864	Cadherin-17	N546	Hex(5)HexNAc(5)Fuc(1)	N-terminus
Q12864	Cadherin-17	N546	Hex(5)HexNAc(5)Fuc(1)NeuAc(1)	N-terminus
Q12864	Cadherin-17	N546	Hex(5)HexNAc(5)Fuc(2)	N-terminus
Q12864	Cadherin-17	N546	Hex(5)HexNAc(6)Fuc(1)	N-terminus
Q12864	Cadherin-17	N546	Hex(5)HexNAc(6)Fuc(1)NeuAc(1)	N-terminus
Q12864	Cadherin-17	N546	Hex(5)HexNAc(6)Fuc(2)NeuAc(1)	N-terminus
Q12864	Cadherin-17	N546	Hex(6)HexNAc(4)	N-terminus
Q12864	Cadherin-17	N546	Hex(6)HexNAc(4)Fuc(1)	N-terminus
Q12864	Cadherin-17	N546	Hex(6)HexNAc(4)Fuc(1)NeuAc(1)	N-terminus
Q12864	Cadherin-17	N546	Hex(6)HexNAc(6)Fuc(1)	N-terminus
Q12864	Cadherin-17	N546	Hex(6)HexNAc(6)Fuc(1)NeuAc(1)	N-terminus
Q12864	Cadherin-17	N546	Hex(6)HexNAc(6)Fuc(1)NeuAc(2)	N-terminus
Q12864	Cadherin-17	N546	Hex(6)HexNAc(6)Fuc(2)	N-terminus
Q12864	Cadherin-17	N546	Hex(6)HexNAc(6)Fuc(2)NeuAc(1)	N-terminus
Q12864	Cadherin-17	N546	Hex(6)HexNAc(6)Fuc(3)	N-terminus
Q12864	Cadherin-17	N546	Hex(6)HexNAc(6)Fuc(3)NeuAc(1)	N-terminus
Q12864	Cadherin-17	N546	Hex(8)HexNAc(2)	N-terminus
Q12864	Cadherin-17	N546	Hex(9)HexNAc(2)	N-terminus
Q12864	Cadherin-17	N587	Hex(3)HexNAc(5)Fuc(1)	N-terminus
Q12864	Cadherin-17	N587	Hex(4)HexNAc(5)Fuc(1)	N-terminus
Q12864	Cadherin-17	N587	Hex(4)HexNAc(5)Fuc(1)NeuAc(1)	N-terminus
Q12864	Cadherin-17	N587	Hex(4)HexNAc(5)Fuc(2)	N-terminus
Q12864	Cadherin-17	N587	Hex(4)HexNAc(5)Fuc(3)	N-terminus
Q12864	Cadherin-17	N587	Hex(5)HexNAc(4)Fuc(1)NeuAc(1)	N-terminus
Q12864	Cadherin-17	N587	Hex(5)HexNAc(4)Fuc(1)NeuAc(2)	N-terminus
Q12864	Cadherin-17	N587	Hex(5)HexNAc(4)Fuc(2)NeuAc(1)	N-terminus
Q12864	Cadherin-17	N587	Hex(5)HexNAc(5)Fuc(1)	N-terminus
Q12864	Cadherin-17	N587	Hex(5)HexNAc(5)Fuc(1)NeuAc(1)	N-terminus
Q12864	Cadherin-17	N587	Hex(5)HexNAc(5)Fuc(1)NeuAc(2)	N-terminus
Q12864	Cadherin-17	N587	Hex(5)HexNAc(5)Fuc(2)	N-terminus
Q12864	Cadherin-17	N587	Hex(5)HexNAc(5)Fuc(2)NeuAc(1)	N-terminus
Q12864	Cadherin-17	N587	Hex(5)HexNAc(5)Fuc(3)	N-terminus
Q12864	Cadherin-17	N587	Hex(5)HexNAc(5)Fuc(3)NeuAc(1)	N-terminus
Q12864	Cadherin-17	N587	Hex(5)HexNAc(5)NeuAc(1)	N-terminus
Q12864	Cadherin-17	N587	Hex(6)HexNAc(5)Fuc(1)NeuAc(1)	N-terminus
Q12864	Cadherin-17	N587	Hex(6)HexNAc(5)Fuc(1)NeuAc(2)	N-terminus
Q12864	Cadherin-17	N587	Hex(6)HexNAc(5)Fuc(2)	N-terminus
Q12864	Cadherin-17	N587	Hex(6)HexNAc(5)Fuc(2)NeuAc(1)	N-terminus
Q12864	Cadherin-17	N587	Hex(6)HexNAc(5)Fuc(3)	N-terminus
Q12864	Cadherin-17	N587	Hex(6)HexNAc(6)Fuc(1)	N-terminus
Q12864	Cadherin-17	N587	Hex(6)HexNAc(6)Fuc(1)NeuAc(1)	N-terminus
Q12864	Cadherin-17	N587	Hex(6)HexNAc(6)Fuc(1)NeuAc(2)	N-terminus
Q12864	Cadherin-17	N587	Hex(6)HexNAc(6)Fuc(1)NeuAc(3)	N-terminus
Q12864	Cadherin-17	N587	Hex(6)HexNAc(6)Fuc(2)	N-terminus
Q12864	Cadherin-17	N587	Hex(6)HexNAc(6)Fuc(2)NeuAc(1)	N-terminus
Q12864	Cadherin-17	N587	Hex(6)HexNAc(6)Fuc(2)NeuAc(2)	N-terminus
Q12864	Cadherin-17	N587	Hex(6)HexNAc(6)Fuc(3)	N-terminus
Q12864	Cadherin-17	N587	Hex(6)HexNAc(6)Fuc(3)NeuAc(1)	N-terminus
Q12864	Cadherin-17	N587	Hex(6)HexNAc(6)Fuc(5)	N-terminus
Q12864	Cadherin-17	N587	Hex(6)HexNAc(6)NeuAc(1)	N-terminus
Q12864	Cadherin-17	N587	Hex(6)HexNAc(6)NeuAc(2)	N-terminus
Q12864	Cadherin-17	N587	Hex(6)HexNAc(6)NeuAc(3)	N-terminus
Q12864	Cadherin-17	N587	Hex(7)HexNAc(6)Fuc(1)NeuAc(1)	N-terminus
Q12864	Cadherin-17	N587	Hex(7)HexNAc(6)Fuc(3)NeuAc(1)	N-terminus
Q12864	Cadherin-17	N587	Hex(7)HexNAc(7)Fuc(2)NeuAc(1)	N-terminus
Q12864	Cadherin-17	N587	Hex(8)HexNAc(2)	N-terminus
Q12864	Cadherin-17	N587	Hex(9)HexNAc(2)	N-terminus
Q12864	Cadherin-17	N587	Hex(10)HexNAc(2)	N-terminus
Q12864	Cadherin-17	N722	Hex(3)HexNAc(5)Fuc(1)	N-terminus
Q12864	Cadherin-17	N722	Hex(4)HexNAc(4)Fuc(1)	N-terminus
Q12864	Cadherin-17	N722	Hex(4)HexNAc(4)Fuc(2)	N-terminus
Q12864	Cadherin-17	N722	Hex(4)HexNAc(5)	N-terminus
Q12864	Cadherin-17	N722	Hex(4)HexNAc(5)Fuc(1)	N-terminus
Q12864	Cadherin-17	N722	Hex(5)HexNAc(3)Fuc(1)	N-terminus
Q12864	Cadherin-17	N722	Hex(5)HexNAc(3)Fuc(1)NeuAc(1)	N-terminus
Q12864	Cadherin-17	N722	Hex(5)HexNAc(3)Fuc(2)	N-terminus
Q12864	Cadherin-17	N722	Hex(5)HexNAc(3)NeuAc(1)	N-terminus
Q12864	Cadherin-17	N722	Hex(5)HexNAc(4)	N-terminus
Q12864	Cadherin-17	N722	Hex(5)HexNAc(4)Fuc(1)	N-terminus
Q12864	Cadherin-17	N722	Hex(5)HexNAc(4)Fuc(1)NeuAc(1)	N-terminus
Q12864	Cadherin-17	N722	Hex(5)HexNAc(4)Fuc(2)	N-terminus
Q12864	Cadherin-17	N722	Hex(5)HexNAc(5)	N-terminus
Q12864	Cadherin-17	N722	Hex(5)HexNAc(5)Fuc(1)	N-terminus
Q12864	Cadherin-17	N722	Hex(5)HexNAc(5)Fuc(1)NeuAc(1)	N-terminus
Q12864	Cadherin-17	N722	Hex(6)HexNAc(3)	N-terminus
Q12864	Cadherin-17	N722	Hex(6)HexNAc(3)Fuc(1)	N-terminus
Q12864	Cadherin-17	N722	Hex(6)HexNAc(3)NeuAc(1)	N-terminus
Q12864	Cadherin-17	N722	Hex(6)HexNAc(4)	N-terminus
Q12864	Cadherin-17	N722	Hex(6)HexNAc(4)Fuc(1)	N-terminus
Q12864	Cadherin-17	N722	Hex(6)HexNAc(4)Fuc(2)	N-terminus
Q12864	Cadherin-17	N722	Hex(6)HexNAc(4)NeuAc(1)	N-terminus
Q12864	Cadherin-17	N722	Hex(7)HexNAc(2)	N-terminus
Q12864	Cadherin-17	N722	Hex(7)HexNAc(4)	N-terminus
Q12864	Cadherin-17	N722	Hex(7)HexNAc(4)Fuc(1)	N-terminus
Q12864	Cadherin-17	N722	Hex(7)HexNAc(4)NeuAc(1)	N-terminus
Q12866	Tyrosine-protein kinase Mer	N316	Hex(6)HexNAc(2)	N-terminus
Q12913	Receptor-type tyrosine-protein phosphatase eta	N142	Hex(5)HexNAc(5)Fuc(1)	N-terminus
Q12913	Receptor-type tyrosine-protein phosphatase eta	N413	Hex(5)HexNAc(5)Fuc(1)	N-terminus
Q12913	Receptor-type tyrosine-protein phosphatase eta	N413	Hex(5)HexNAc(5)Fuc(4)NeuAc(1)	N-terminus
Q12913	Receptor-type tyrosine-protein phosphatase eta	N413	Hex(6)HexNAc(6)Fuc(1)	N-terminus
Q12913	Receptor-type tyrosine-protein phosphatase eta	N413	Hex(7)HexNAc(7)NeuAc(1)	N-terminus
Q12913	Receptor-type tyrosine-protein phosphatase eta	N413	Hex(9)HexNAc(2)	N-terminus
Q12913	Receptor-type tyrosine-protein phosphatase eta	N937	Hex(6)HexNAc(2)	N-terminus
Q12913	Receptor-type tyrosine-protein phosphatase eta	N937	Hex(7)HexNAc(2)	N-terminus
Q12913	Receptor-type tyrosine-protein phosphatase eta	N937	Hex(8)HexNAc(2)	N-terminus
Q13308	Inactive tyrosine-protein kinase 7	N116	Hex(5)HexNAc(5)Fuc(1)NeuAc(1)	N-terminus
Q13308	Inactive tyrosine-protein kinase 7	N116	Hex(5)HexNAc(5)Fuc(1)NeuAc(2)	N-terminus
Q13308	Inactive tyrosine-protein kinase 7	N116	Hex(5)HexNAc(5)Fuc(2)NeuAc(1)	N-terminus
Q13308	Inactive tyrosine-protein kinase 7	N116	Hex(6)HexNAc(6)NeuAc(2)	N-terminus
Q13308	Inactive tyrosine-protein kinase 7	N175	Hex(5)HexNAc(5)Fuc(1)	N-terminus
Q13308	Inactive tyrosine-protein kinase 7	N175	Hex(5)HexNAc(5)Fuc(1)NeuAc(1)	N-terminus
Q13308	Inactive tyrosine-protein kinase 7	N175	Hex(5)HexNAc(5)Fuc(1)NeuAc(2)	N-terminus
Q13308	Inactive tyrosine-protein kinase 7	N405	Hex(5)HexNAc(5)Fuc(1)NeuAc(1)	N-terminus
Q13308	Inactive tyrosine-protein kinase 7	N405	Hex(5)HexNAc(5)Fuc(1)NeuAc(2)	N-terminus
Q13308	Inactive tyrosine-protein kinase 7	N405	Hex(5)HexNAc(5)Fuc(2)NeuAc(1)	N-terminus
Q13308	Inactive tyrosine-protein kinase 7	N405	Hex(5)HexNAc(5)Fuc(3)NeuAc(1)	N-terminus
Q13308	Inactive tyrosine-protein kinase 7	N405	Hex(5)HexNAc(5)NeuAc(2)	N-terminus
Q13308	Inactive tyrosine-protein kinase 7	N567	Hex(5)HexNAc(5)Fuc(1)NeuAc(1)	N-terminus
Q13308	Inactive tyrosine-protein kinase 7	N567	Hex(5)HexNAc(5)Fuc(3)	N-terminus
Q13308	Inactive tyrosine-protein kinase 7	N567	Hex(9)HexNAc(2)	N-terminus
Q13308	Inactive tyrosine-protein kinase 7	N646	Hex(6)HexNAc(4)Fuc(1)	N-terminus
Q13443	Disintegrin and metalloproteinase domain-containing protein 9	N381	Hex(7)HexNAc(2)	N-terminus
Q13443	Disintegrin and metalloproteinase domain-containing protein 9	N381	Hex(8)HexNAc(2)	N-terminus
Q13443	Disintegrin and metalloproteinase domain-containing protein 9	N381	Hex(9)HexNAc(2)	N-terminus
Q13683	Integrin alpha-7	N1025	Hex(9)HexNAc(2)	N-terminus
[truncated: 555 more rows]
