# Supplementary material for: Membrane glycomics reveal heterogeneity and quantitative distribution of cell surface sialylation
Source: Royal Society of Chemistry journal article supplement (doi:10.1039/c8sc01875h), 2018-01-01
Supplement: c8sc01875h3.xlsx [file c8sc01875h3.xlsx]

## Sheet: Details
Table S3. Details of unique cell surface glycoforms identified on Caco-2 membrane proteins. Sites of glycosylation are boldfaced. Identifications with Byonic scores < 200 are italicized. Other modifications include oxidation (Px), deamidation (N+, Q+), carbamidomethylation (C*), and methylation (K−, R−).
UniProt Accession	Protein Name	Starting Position	Peptide	Glycan Composition	Theoretical [M+H]+	Observed [M+H]+	Observed Charge	Mass Error (ppm) (ppm)	|Log Prob|	Byonic Score	Delta Mod
O14672	Disintegrin and metalloproteinase domain-containing protein 10	277	INTTADEKDPTN+PFRFPNIGVEK	Hex(4)HexNAc(6)	4470.98	4469.96	4	-3	2.61	304.58	23.24
O14672	Disintegrin and metalloproteinase domain-containing protein 10	277	INTTADEKDPTNPFR	Hex(8)HexNAc(2)	3421.42	3421.42	3	0.9	10.23	638.85	399.01
O14672	Disintegrin and metalloproteinase domain-containing protein 10	277	INTTADEKDPTNPFR	Hex(9)HexNAc(2)	3583.47	3583.47	3	1.7	13.15	763.56	524.27
O14672	Disintegrin and metalloproteinase domain-containing protein 10	277	INTTADEKDPTNPFRFPNIGVEK	Hex(8)HexNAc(2)	4305.89	4305.9	4	1.4	5.42	475.55	169.65
O14672	Disintegrin and metalloproteinase domain-containing protein 10	277	INTTADEKDPTNPFRFPNIGVEK	Hex(9)HexNAc(2)	4467.94	4467.95	4	1	13.5	816.81	462.18
O14672	Disintegrin and metalloproteinase domain-containing protein 10	275	IRINTTADEKDPTNPFR	Hex(9)HexNAc(2)	3852.65	3852.66	4	0.6	5.18	401.06	243.6
O14672	Disintegrin and metalloproteinase domain-containing protein 10	267	NISFMVK	Hex(9)HexNAc(2)	2703.08	2703.08	2	-1.3	3.39	266.72	65.05
O14672	Disintegrin and metalloproteinase domain-containing protein 10	439	NISQVLEK	Hex(6)HexNAc(2)	2309	2309.01	2	3.4	6.24	469.62	200.77
O14672	Disintegrin and metalloproteinase domain-containing protein 10	439	NISQVLEK	Hex(7)HexNAc(2)	2471.05	2471.06	2	1.9	8.94	629.54	253.07
O14672	Disintegrin and metalloproteinase domain-containing protein 10	439	NISQVLEK	Hex(8)HexNAc(2)	2633.11	2633.11	2	0.5	6.76	553.51	253.77
O14672	Disintegrin and metalloproteinase domain-containing protein 10	439	NISQVLEK	Hex(9)HexNAc(2)	2795.16	2795.16	2	1.6	6.87	573.94	258.94
O14672	Disintegrin and metalloproteinase domain-containing protein 10	439	NISQVLEK	Hex(10)HexNAc(2)	2957.21	2957.2	2	-3.6	6.03	485.15	182.14
O14672	Disintegrin and metalloproteinase domain-containing protein 10	533	EGIC*N+GFTALC*PASDPKPNFTDC*NR	Hex(3)HexNAc(6)	4546.86	4546.84	4	-4.4	2.48	241.57	97.09
O14672	Disintegrin and metalloproteinase domain-containing protein 10	533	EGIC*N+GFTALC*PASDPKPNFTDC*NR	Hex(5)HexNAc(5)Fuc(1)	4813.94	4812.92	4	-3.6	4.74	308.73	187.5
O14672	Disintegrin and metalloproteinase domain-containing protein 10	533	EGIC*N+GFTALC*PASDPKPNFTDC*NR	Hex(5)HexNAc(5)Fuc(1)NeuAc(1)	5105.04	5105.04	4	0	6.86	511.63	73.14
O14672	Disintegrin and metalloproteinase domain-containing protein 10	533	EGIC*N+GFTALC*PASDPKPNFTDC*NR	Hex(5)HexNAc(5)Fuc(2)NeuAc(1)	5251.1	5251.1	4	0.7	3.16	261.31	45.13
O14672	Disintegrin and metalloproteinase domain-containing protein 10	533	EGIC*N+GFTALC*PASDPKPNFTDC*NR	Hex(5)HexNAc(5)Fuc(3)	5106.06	5107.04	4	-3.9	3.68	283.23	116.16
O14672	Disintegrin and metalloproteinase domain-containing protein 10	533	EGIC*N+GFTALC*PASDPKPNFTDC*NR	Hex(6)HexNAc(5)Fuc(1)NeuAc(1)	5267.09	5266.09	4	0.5	6.36	339.31	253.33
O14672	Disintegrin and metalloproteinase domain-containing protein 10	533	EGIC*N+GFTALC*PASDPKPNFTDC*NR	Hex(7)HexNAc(2)	4382.75	4382.75	3	-0.9	5.44	307.2	123.87
O14672	Disintegrin and metalloproteinase domain-containing protein 10	533	EGIC*N+GFTALC*PASDPKPNFTDC*NR	Hex(8)HexNAc(2)	4544.8	4544.82	3	2.6	8.13	534.45	178.95
O14672	Disintegrin and metalloproteinase domain-containing protein 10	533	EGIC*N+GFTALC*PASDPKPNFTDC*NR	Hex(9)HexNAc(2)	4706.86	4706.86	3	0.8	5.87	318.96	117.01
O14672	Disintegrin and metalloproteinase domain-containing protein 10	533	EGIC*NGFTALC*PASDPKPNFTDC*NR	Hex(3)HexNAc(6)	4545.87	4544.86	3	-1.4	6.33	348.7	242.48
O14672	Disintegrin and metalloproteinase domain-containing protein 10	533	EGIC*NGFTALC*PASDPKPNFTDC*NR	Hex(5)HexNAc(5)Fuc(1)	4812.96	4812.96	4	-0.2	5.45	330.08	216.77
O14672	Disintegrin and metalloproteinase domain-containing protein 10	533	EGIC*NGFTALC*PASDPKPNFTDC*NR	Hex(5)HexNAc(5)Fuc(1)NeuAc(1)	5104.05	5103.06	4	1.2	7.28	556.97	319.83
O14672	Disintegrin and metalloproteinase domain-containing protein 10	533	EGIC*NGFTALC*PASDPKPNFTDC*NR	Hex(5)HexNAc(5)Fuc(3)NeuAc(1)	5396.17	5396.2	4	4.9	2	183.38	122.71
O14672	Disintegrin and metalloproteinase domain-containing protein 10	533	EGIC*NGFTALC*PASDPKPNFTDC*NR	Hex(5)HexNAc(5)Fuc(4)	5251.13	5250.15	4	3.4	2.55	244.57	67.94
O14672	Disintegrin and metalloproteinase domain-containing protein 10	533	EGIC*NGFTALC*PASDPKPNFTDC*NR	Hex(6)HexNAc(5)Fuc(1)NeuAc(1)	5266.11	5265.1	4	-0.4	4.77	265.46	163.74
O14672	Disintegrin and metalloproteinase domain-containing protein 10	533	EGIC*NGFTALC*PASDPKPNFTDC*NR	Hex(8)HexNAc(2)	4543.82	4542.83	3	2.1	6.59	366.13	121.36
O15031	Plexin-B2	124	ALSNISLR	Hex(4)HexNAc(5)Fuc(1)	2683.18	2683.19	2	2.4	2.05	260.19	23.1
O15031	Plexin-B2	124	ALSNISLR	Hex(5)HexNAc(5)Fuc(1)	2845.23	2845.24	3	0.7	2.53	280.95	48.84
O15031	Plexin-B2	124	ALSNISLR	Hex(5)HexNAc(5)Fuc(4)NeuAc(2)	3865.6	3865.59	4	-3.1	2.08	230.53	11.44
O15031	Plexin-B2	124	ALSNISLR	Hex(8)HexNAc(2)	2576.1	2576.1	2	0.9	6.19	435.38	150.37
O15031	Plexin-B2	124	ALSNISLR	Hex(9)HexNAc(2)	2738.15	2738.15	2	1.4	5.64	412.64	128.92
O15031	Plexin-B2	788	C*VYEALC*NTTSEC*PPPVITR	Hex(4)HexNAc(5)Fuc(2)NeuAc(1)	4613.9	4612.89	3	-0.9	5.79	296.26	155.7
O15031	Plexin-B2	788	C*VYEALC*NTTSEC*PPPVITR	Hex(5)HexNAc(5)Fuc(1)NeuAc(2)	4920.99	4920.01	4	4.8	10.51	622.75	481.3
O15031	Plexin-B2	788	C*VYEALC*NTTSEC*PPPVITR	Hex(5)HexNAc(5)Fuc(2)NeuAc(1)	4775.95	4776.96	4	1.8	6.72	389.63	27.31
O15031	Plexin-B2	788	C*VYEALC*NTTSEC*PPPVITR	Hex(5)HexNAc(5)Fuc(3)	4630.91	4631.91	3	-2.2	5.89	365.43	187.98
O15031	Plexin-B2	788	C*VYEALC*NTTSEC*PPPVITR	Hex(8)HexNAc(2)	4069.66	4070.68	3	4.4	6.49	463.33	293.91
O15031	Plexin-B2	788	C*VYEALC*NTTSEC*PPPVITR	Hex(9)HexNAc(2)	4231.71	4230.71	3	0.3	10.87	616.69	388.87
O15031	Plexin-B2	1031	EAESLQPMTVVGTDYVFHNDTK	Hex(5)HexNAc(4)Fuc(1)NeuAc(1)	4540.9	4541.9	3	0.5	4.68	311.81	91.34
O15031	Plexin-B2	1031	EAESLQPMTVVGTDYVFHNDTK	Hex(5)HexNAc(5)Fuc(1)	4452.88	4452.9	3	3.7	4.91	404.14	162.16
O15031	Plexin-B2	1031	EAESLQPMTVVGTDYVFHNDTK	Hex(5)HexNAc(5)Fuc(1)NeuAc(1)	4743.97	4743.98	3	1.9	6.95	529.69	117.59
O15031	Plexin-B2	1031	EAESLQPMTVVGTDYVFHNDTK	Hex(5)HexNAc(6)	4509.9	4509.9	4	0.5	3.71	274.59	29.55
O15031	Plexin-B2	1031	EAESLQPMTVVGTDYVFHNDTK	Hex(9)HexNAc(2)	4345.79	4345.81	3	3.5	6.19	409.44	135.51
O15031	Plexin-B2	1031	EAESLQPxMTVVGTDYVFHN(DTK	Hex(9)HexNAc(2)	4361.79	4362.78	3	-3.3	2.45	236.18	95.79
O15031	Plexin-B2	753	LHVTLYNC*SFGR	Hex(6)HexNAc(3)NeuAc(1)	3339.37	3339.37	3	-0.6	6.29	427.73	219.59
O15031	Plexin-B2	753	LHVTLYNC*SFGR	Hex(6)HexNAc(4)	3251.36	3251.35	3	-1.4	5.87	389.51	169.21
O15031	Plexin-B2	753	LHVTLYNC*SFGR	Hex(8)HexNAc(2)	3169.3	3169.3	3	-1.6	6.36	446.64	248.95
O15031	Plexin-B2	753	LHVTLYNC*SFGR	Hex(9)HexNAc(2)	3331.36	3331.36	3	1.4	8.17	580.82	329.73
O15031	Plexin-B2	728	LSHDANETLPLHLYVK	Hex(5)HexNAc(4)Fuc(1)NeuAc(1)	3909.72	3909.72	4	-0.1	6.9	494.25	308.69
O15031	Plexin-B2	728	LSHDANETLPLHLYVK	Hex(5)HexNAc(4)Fuc(1)NeuAc(2)	4200.81	4200.81	4	-0.1	6.22	385.67	55.46
O15031	Plexin-B2	728	LSHDANETLPLHLYVK	Hex(5)HexNAc(4)Fuc(2)	3764.68	3764.68	4	0.5	4.99	275.35	117.52
O15031	Plexin-B2	728	LSHDANETLPLHLYVK	Hex(5)HexNAc(4)Fuc(2)NeuAc(1)	4055.77	4055.77	4	0.1	6.78	460.03	37.64
O15031	Plexin-B2	728	LSHDANETLPLHLYVK	Hex(5)HexNAc(4)Fuc(3)	3910.74	3910.74	4	0.5	2.32	220.94	79.31
O15031	Plexin-B2	728	LSHDANETLPLHLYVK	Hex(5)HexNAc(5)Fuc(1)	3821.7	3821.7	4	-0.3	7.01	526.24	319.23
O15031	Plexin-B2	728	LSHDANETLPLHLYVK	Hex(5)HexNAc(5)Fuc(1)NeuAc(1)	4112.79	4112.81	4	2.4	7.26	541.9	65.28
O15031	Plexin-B2	728	LSHDANETLPLHLYVK	Hex(5)HexNAc(5)Fuc(1)NeuAc(2)	4403.89	4403.9	4	1.6	6.52	428.22	16.09
O15031	Plexin-B2	728	LSHDANETLPLHLYVK	Hex(5)HexNAc(5)Fuc(2)NeuAc(1)	4258.85	4258.87	3	3.2	5.99	503	91.12
O15031	Plexin-B2	728	LSHDANETLPLHLYVK	Hex(5)HexNAc(5)Fuc(4)	4259.87	4260.86	4	-3.1	6.23	385.66	316.48
O15031	Plexin-B2	728	LSHDANETLPLHLYVK	Hex(5)HexNAc(5)NeuAc(1)	3966.74	3966.75	4	3.7	6.62	467.28	317.43
O15031	Plexin-B2	728	LSHDANETLPLHLYVK	Hex(8)HexNAc(2)	3552.56	3552.56	4	-1.3	6.05	347.91	209.02
O15031	Plexin-B2	728	LSHDANETLPLHLYVK	Hex(9)HexNAc(2)	3714.61	3714.61	4	0	12.57	736.87	469.4
O15031	Plexin-B2	728	LSHDANETLPLHLYVK	Hex(10)HexNAc(2)	3876.67	3876.67	4	0.1	6.17	360.17	148.3
O15031	Plexin-B2	844	NC*SFQPER	Hex(5)HexNAc(5)Fuc(1)NeuAc(1)	3300.26	3300.26	3	0.1	2.14	218.4	78.35
O15031	Plexin-B2	844	NC*SFQPER	Hex(5)HexNAc(5)Fuc(1)NeuAc(2)	3591.36	3591.36	3	0.8	4.12	240.92	93.58
O15031	Plexin-B2	844	NC*SFQPER	Hex(9)HexNAc(2)	2902.08	2902.08	2	1.3	6.16	416.88	236.41
O15031	Plexin-B2	517	SC*VAVTSAQPQ+NMSR	Hex(9)HexNAc(2)	3501.38	3501.39	3	2.7	2	178.59	13.28
O15031	Plexin-B2	517	SC*VAVTSAQPQNMSR	Hex(5)HexNAc(2)	2852.18	2852.17	3	-2.1	5.94	411.1	220.07
O15031	Plexin-B2	517	SC*VAVTSAQPQNMSR	Hex(5)HexNAc(5)	3461.42	3461.43	3	3.5	5.95	415.58	207.01
O15031	Plexin-B2	517	SC*VAVTSAQPQNMSR	Hex(5)HexNAc(5)Fuc(2)	3753.53	3753.54	2	1.6	4.18	224.13	99.2
O15031	Plexin-B2	517	SC*VAVTSAQPQNMSR	Hex(9)HexNAc(2)	3500.39	3500.39	3	-0.6	8.35	566.05	391.82
O15031	Plexin-B2	517	SC*VAVTSAQPxQNMSR	Hex(5)HexNAc(5)	3477.41	3477.41	3	0.3	6.31	425.98	195.25
O15031	Plexin-B2	517	SC*VAVTSAQPxQNMSR	Hex(5)HexNAc(5)NeuAc(1)	3768.51	3768.52	3	2.5	6.28	422.98	248.87
O15031	Plexin-B2	517	SC*VAVTSAQPxQNMSR	Hex(6)HexNAc(2)	3030.23	3030.24	3	3.9	5.76	333.11	220.31
O15031	Plexin-B2	993	SFASGGRSINVTGQGFSLIQR	Hex(5)HexNAc(2)	3398.56	3398.54	3	-5	4.49	254.18	210.08
O15031	Plexin-B2	1000	SINVTGQGFSLIQR	Hex(7)HexNAc(2)	3060.35	3060.36	3	2.8	10.08	633.08	409.94
O15031	Plexin-B2	1000	SINVTGQGFSLIQR	Hex(8)HexNAc(2)	3222.4	3222.4	3	0	16.28	941.87	696.08
O15031	Plexin-B2	1000	SINVTGQGFSLIQR	Hex(9)HexNAc(2)	3384.46	3384.46	3	0.5	15.31	859.45	618.03
O15031	Plexin-B2	1084	TEAGAFEYVPDPTFENFTGGVK	Hex(4)HexNAc(5)Fuc(1)	4185.77	4185.78	3	1.6	7.11	545.93	294.77
O15031	Plexin-B2	1084	TEAGAFEYVPDPTFENFTGGVK	Hex(4)HexNAc(5)Fuc(1)NeuAc(1)	4476.86	4476.88	3	3.6	6.9	526.49	46.69
O15031	Plexin-B2	1084	TEAGAFEYVPDPTFENFTGGVK	Hex(4)HexNAc(6)	4242.79	4242.79	3	1	2.62	237.76	96.69
O15031	Plexin-B2	1084	TEAGAFEYVPDPTFENFTGGVK	Hex(5)HexNAc(3)Fuc(1)NeuAc(1)	4232.76	4232.76	3	1	8.41	553.21	245.16
O15031	Plexin-B2	1084	TEAGAFEYVPDPTFENFTGGVK	Hex(5)HexNAc(4)Fuc(1)	4144.74	4143.75	3	3.5	5.77	429.8	273.94
O15031	Plexin-B2	1084	TEAGAFEYVPDPTFENFTGGVK	Hex(5)HexNAc(4)Fuc(1)NeuAc(1)	4435.84	4435.84	3	0.1	9.61	596.32	59.09
O15031	Plexin-B2	1084	TEAGAFEYVPDPTFENFTGGVK	Hex(5)HexNAc(4)NeuAc(1)	4289.78	4290.79	3	1.9	4.87	313.78	39.01
O15031	Plexin-B2	1084	TEAGAFEYVPDPTFENFTGGVK	Hex(5)HexNAc(5)Fuc(1)	4347.82	4347.83	3	2.3	8.36	573.24	318.21
O15031	Plexin-B2	1084	TEAGAFEYVPDPTFENFTGGVK	Hex(5)HexNAc(5)Fuc(1)NeuAc(1)	4638.92	4638.92	3	1.5	11.59	652.91	59.85
O15031	Plexin-B2	1084	TEAGAFEYVPDPTFENFTGGVK	Hex(5)HexNAc(5)Fuc(2)	4493.88	4494.87	3	-2.2	4.09	296.38	180.96
O15031	Plexin-B2	1084	TEAGAFEYVPDPTFENFTGGVK	Hex(5)HexNAc(5)NeuAc(1)	4492.86	4492.87	3	2.1	5.26	266.87	12.85
O15031	Plexin-B2	1084	TEAGAFEYVPDPTFENFTGGVK	Hex(5)HexNAc(6)	4404.84	4403.83	3	-1.8	5	279.04	95.31
O15031	Plexin-B2	1084	TEAGAFEYVPDPTFENFTGGVK	Hex(5)HexNAc(6)Fuc(1)NeuAc(1)	4842	4842.01	4	1.9	6.5	380.49	36.7
O15031	Plexin-B2	1084	TEAGAFEYVPDPTFENFTGGVK	Hex(5)HexNAc(6)Fuc(1)NeuAc(2)	5133.09	5132.1	4	1.5	6.57	366.37	177.61
O15031	Plexin-B2	1084	TEAGAFEYVPDPTFENFTGGVK	Hex(6)HexNAc(4)Fuc(1)	4306.8	4306.79	3	-1.5	6.3	393.32	207.96
O15031	Plexin-B2	1084	TEAGAFEYVPDPTFENFTGGVK	Hex(6)HexNAc(4)Fuc(2)	4452.85	4451.86	3	3.1	5.98	309.06	218.82
O15031	Plexin-B2	1084	TEAGAFEYVPDPTFENFTGGVK	Hex(6)HexNAc(5)Fuc(1)	4509.87	4509.9	3	4.7	5.91	413.99	218.44
O15031	Plexin-B2	1084	TEAGAFEYVPDPTFENFTGGVK	Hex(6)HexNAc(5)Fuc(1)NeuAc(1)	4800.97	4800.95	3	-3.6	5.74	370.51	164.51
O15031	Plexin-B2	1084	TEAGAFEYVPDPTFENFTGGVK	Hex(6)HexNAc(5)Fuc(1)NeuAc(2)	5092.07	5091.06	3	-1	6.52	411.38	257.7
O15031	Plexin-B2	1084	TEAGAFEYVPDPTFENFTGGVK	Hex(6)HexNAc(5)Fuc(2)	4655.93	4655.95	4	4.1	7.89	480.77	346.7
O15031	Plexin-B2	1084	TEAGAFEYVPDPTFENFTGGVK	Hex(6)HexNAc(6)Fuc(1)NeuAc(1)	5004.05	5004.07	3	3.6	7.09	524.8	27.64
O15031	Plexin-B2	1084	TEAGAFEYVPDPTFENFTGGVK	Hex(6)HexNAc(6)Fuc(1)NeuAc(2)	5295.14	5295.13	3	-1.9	6.24	418.27	272.96
O15031	Plexin-B2	1084	TEAGAFEYVPDPTFENFTGGVK	Hex(6)HexNAc(6)Fuc(2)	4859.01	4859.03	3	3.6	5.99	336.94	237.06
O15031	Plexin-B2	1084	TEAGAFEYVPDPTFENFTGGVK	Hex(6)HexNAc(6)Fuc(2)NeuAc(1)	5150.11	5149.11	4	1.6	6.38	324.61	56.87
O15031	Plexin-B2	1084	TEAGAFEYVPDPTFENFTGGVK	Hex(6)HexNAc(6)Fuc(3)NeuAc(1)	5296.17	5295.17	4	2.3	7.04	448.76	319.33
O15031	Plexin-B2	1084	TEAGAFEYVPDPTFENFTGGVK	Hex(6)HexNAc(6)Fuc(4)	5151.13	5151.14	4	1.9	5.4	284.64	127.96
O15031	Plexin-B2	1084	TEAGAFEYVPDPTFENFTGGVK	Hex(6)HexNAc(6)NeuAc(1)	4857.99	4859.01	4	3.8	3.72	250.19	20.21
O15031	Plexin-B2	1084	TEAGAFEYVPDPTFENFTGGVK	Hex(7)HexNAc(6)Fuc(2)NeuAc(1)	5312.16	5312.17	4	1.9	5.33	258.73	35.72
O15031	Plexin-B2	1084	TEAGAFEYVPDPTFENFTGGVK	Hex(8)HexNAc(2)	4078.68	4078.7	3	3.3	12.35	708.24	337.42
O15031	Plexin-B2	1084	TEAGAFEYVPDPTFENFTGGVK	Hex(9)HexNAc(2)	4240.74	4240.74	3	0.2	16.61	907.59	385.75
O15031	Plexin-B2	1084	TEAGAFEYVPxDPTFENFTGGVK	Hex(4)HexNAc(6)	4258.79	4258.78	3	-1.6	4.98	281.48	19.42
O15031	Plexin-B2	1084	TEAGAFEYVPDPTFENFTGGVKK	Hex(5)HexNAc(4)Fuc(1)NeuAc(1)	4563.93	4563.94	3	2.6	2.29	287.61	79.15
O15031	Plexin-B2	1084	TEAGAFEYVPDPTFENFTGGVKK	Hex(5)HexNAc(5)Fuc(1)	4475.92	4474.9	3	-3.3	2.4	289.84	60.15
O15031	Plexin-B2	1084	TEAGAFEYVPDPTFENFTGGVKK	Hex(5)HexNAc(5)Fuc(1)NeuAc(1)	4767.01	4766	4	-0.9	6.43	444.77	273.15
O15031	Plexin-B2	1084	TEAGAFEYVPDPTFENFTGGVKK	Hex(8)HexNAc(2)	4206.78	4206.76	3	-4.6	4.26	331.84	160.29
O15031	Plexin-B2	1084	TEAGAFEYVPDPTFENFTGGVK	Hex(4)HexNAc(3)Fuc(1)NeuAc(1)	4070.71	4070.7	3	-0.9	6.62	459.98	214.77
O15031	Plexin-B2	1084	TEAGAFEYVPDPTFENFTGGVK	Hex(4)HexNAc(4)Fuc(2)NeuAc(1)	4419.84	4420.85	3	0.7	4.82	247.23	115.26
O15031	Plexin-B2	1084	TEAGAFEYVPDPTFENFTGGVK	Hex(10)HexNAc(2)	4402.79	4402.8	3	1.7	9.57	597.67	229.91
O15230	Laminin subunit alpha-5	2422	DNATLQATLHAAR	Hex(8)HexNAc(2)	3084.3	3084.3	3	-0.6	8.11	586.46	321.11
O15230	Laminin subunit alpha-5	2422	DNATLQATLHAAR	Hex(9)HexNAc(2)	3246.35	3246.35	3	0.4	6.01	414.3	174.64
O15230	Laminin subunit alpha-5	2704	GVHNASLALSASIGR	Hex(5)HexNAc(5)Fuc(1)NeuAc(1)	3715.61	3715.61	3	0.8	2.92	293.08	99.39
O15230	Laminin subunit alpha-5	84	LVGGPVAGGDPNQTIR	Hex(5)HexNAc(2)	2767.25	2767.26	3	2.3	9.19	603.22	347.26
O15230	Laminin subunit alpha-5	84	LVGGPVAGGDPNQTIR	Hex(8)HexNAc(2)	3253.41	3253.41	3	0.7	6.68	449.17	220.77
O15230	Laminin subunit alpha-5	1324	VWQGHANASFC*PHGYGC*R	Hex(9)HexNAc(2)	3968.54	3968.53	4	-1.1	15.41	867.82	704.22
O43490	Prominin-1	385	VLNSIGSDIDNVTQR	Hex(9)HexNAc(2)	3495.47	3495.48	3	1.5	5.21	385.42	145.97
O43490	Prominin-1	214	YILAQYNTTK	Hex(5)HexNAc(5)Fuc(1)	3186.36	3186.36	3	1.1	3.24	242.42	163.05
O43490	Prominin-1	214	YILAQYNTTK	Hex(6)HexNAc(6)Fuc(3)NeuAc(1)	4134.7	4133.69	3	-1.7	4.05	279.36	12.38
O43657	Tetraspanin-6	132	QYNSTGDYR	Hex(8)HexNAc(2)	2806.06	2806.06	2	0.7	3.46	385.94	73.89
O60449	Lymphocyte antigen 75	342	K−PLNNTVELTDVWTYSDTR	Hex(4)HexNAc(5)Fuc(4)NeuAc(1)	4805.07	4804.08	4	3.1	2	149.19	127.35
O60449	Lymphocyte antigen 75	1635	C*SMLIASNETWK	Hex(8)HexNAc(2)	3142.25	3142.25	3	2.4	6.93	567.96	349.12
O60449	Lymphocyte antigen 75	127	DGHGTAISNASDVWK	Hex(5)HexNAc(5)Fuc(1)	3529.45	3529.45	3	-0.3	9.22	611.59	279.24
O60449	Lymphocyte antigen 75	127	DGHGTAISNASDVWK	Hex(5)HexNAc(5)Fuc(1)NeuAc(1)	3820.54	3820.55	3	1.3	6.72	531.28	192.64
O60449	Lymphocyte antigen 75	127	DGHGTAISNASDVWK	Hex(5)HexNAc(5)Fuc(1)NeuAc(2)	4111.64	4112.64	3	-0.6	6.36	372.15	34.33
O60449	Lymphocyte antigen 75	127	DGHGTAISNASDVWK	Hex(5)HexNAc(5)Fuc(2)	3675.51	3675.5	3	-2.4	5.89	377.43	196.16
O60449	Lymphocyte antigen 75	127	DGHGTAISNASDVWK	Hex(9)HexNAc(2)	3422.36	3422.37	3	1.1	6.22	370.21	171.72
O60449	Lymphocyte antigen 75	1590	ENNNITMR	Hex(7)HexNAc(2)	2531.99	2532	2	1.8	5.35	298.71	154.76
O60449	Lymphocyte antigen 75	1590	ENNNITMR	Hex(8)HexNAc(2)	2694.04	2694.05	2	1.7	5.93	411.36	190.51
O60449	Lymphocyte antigen 75	1590	ENNNITMR	Hex(9)HexNAc(2)	2856.1	2856.11	2	4.9	5.72	382.88	213.39
O60449	Lymphocyte antigen 75	863	IANISGDGQK	Hex(5)HexNAc(5)Fuc(1)NeuAc(1)	3265.34	3265.34	3	0.8	6.1	382.21	207.78
O60449	Lymphocyte antigen 75	863	IANISGDGQK	Hex(5)HexNAc(5)Fuc(1)NeuAc(2)	3556.43	3556.43	3	0.8	5.91	409.05	197.24
O60449	Lymphocyte antigen 75	863	IANISGDGQK	Hex(5)HexNAc(5)Fuc(2)NeuAc(1)	3411.39	3411.4	3	1.9	5.58	312.54	202.11
O60449	Lymphocyte antigen 75	863	IANISGDGQK	Hex(5)HexNAc(5)Fuc(4)	3412.41	3412.41	3	-2.5	2.17	138.82	96.05
O60449	Lymphocyte antigen 75	863	IANISGDGQK	Hex(9)HexNAc(2)	2867.16	2867.15	3	-1.1	2.91	299.52	50.46
O60449	Lymphocyte antigen 75	517	IYEDEVPFGTN+C*NLTITSR	Hex(7)HexNAc(4)NeuAc(1)	4467.82	4466.81	3	-1	5.92	360.72	105
O60449	Lymphocyte antigen 75	517	IYEDEVPFGTNC*NLTITSR	Hex(10)HexNAc(2)	4255.74	4254.72	3	-2	6.8	501.95	253.63
O60449	Lymphocyte antigen 75	517	IYEDEVPFGTNC*NLTITSR	Hex(4)HexNAc(5)NeuAc(1)	4183.75	4182.74	3	-1.1	5.95	436.16	218.27
O60449	Lymphocyte antigen 75	517	IYEDEVPFGTNC*NLTITSR	Hex(5)HexNAc(4)	3851.63	3851.63	3	0.7	9.65	597.27	298.63
O60449	Lymphocyte antigen 75	517	IYEDEVPFGTNC*NLTITSR	Hex(5)HexNAc(4)Fuc(1)	3997.69	3997.69	3	0.9	5.99	319.47	181.06
O60449	Lymphocyte antigen 75	517	IYEDEVPFGTNC*NLTITSR	Hex(5)HexNAc(4)Fuc(1)NeuAc(1)	4288.78	4288.79	3	0.7	3.79	330.58	54.01
O60449	Lymphocyte antigen 75	517	IYEDEVPFGTNC*NLTITSR	Hex(5)HexNAc(4)Fuc(2)	4143.75	4142.76	3	3.8	4.74	324.09	144.27
O60449	Lymphocyte antigen 75	517	IYEDEVPFGTNC*NLTITSR	Hex(5)HexNAc(4)NeuAc(1)	4142.73	4142.73	3	1.9	7.01	520.6	70.99
O60449	Lymphocyte antigen 75	517	IYEDEVPFGTNC*NLTITSR	Hex(5)HexNAc(5)	4054.71	4054.72	3	1.8	11.57	662.39	352.72
O60449	Lymphocyte antigen 75	517	IYEDEVPFGTNC*NLTITSR	Hex(5)HexNAc(5)Fuc(1)	4200.77	4199.77	3	1.5	5.41	342.48	166.01
O60449	Lymphocyte antigen 75	517	IYEDEVPFGTNC*NLTITSR	Hex(5)HexNAc(5)Fuc(1)NeuAc(1)	4491.86	4492.85	3	-4.4	4.7	248.25	59.55
O60449	Lymphocyte antigen 75	517	IYEDEVPFGTNC*NLTITSR	Hex(5)HexNAc(5)Fuc(2)	4346.83	4346.83	3	1.2	6.77	473.88	275.48
O60449	Lymphocyte antigen 75	517	IYEDEVPFGTNC*NLTITSR	Hex(5)HexNAc(5)NeuAc(1)	4345.81	4345.81	3	0.5	10.61	639.11	62.98
O60449	Lymphocyte antigen 75	517	IYEDEVPFGTNC*NLTITSR	Hex(5)HexNAc(5)NeuAc(2)	4636.9	4636.9	3	-0.9	6.04	346.96	22.14
O60449	Lymphocyte antigen 75	517	IYEDEVPFGTNC*NLTITSR	Hex(5)HexNAc(6)Fuc(5)NeuAc(2)	5570.27	5569.27	4	-0.1	6.34	319.68	282.31
O60449	Lymphocyte antigen 75	517	IYEDEVPFGTNC*NLTITSR	Hex(6)HexNAc(4)	4013.68	4013.68	3	0.3	7.25	556.01	84.68
O60449	Lymphocyte antigen 75	517	IYEDEVPFGTNC*NLTITSR	Hex(6)HexNAc(4)Fuc(1)	4159.74	4159.75	3	2.6	5.94	350.15	169.78
O60449	Lymphocyte antigen 75	517	IYEDEVPFGTNC*NLTITSR	Hex(6)HexNAc(4)NeuAc(1)	4304.78	4304.8	3	4.8	2.21	405.07	18.06
O60449	Lymphocyte antigen 75	517	IYEDEVPFGTNC*NLTITSR	Hex(6)HexNAc(5)Fuc(1)	4362.82	4362.81	4	-2.9	7.01	496.73	156.43
O60449	Lymphocyte antigen 75	517	IYEDEVPFGTNC*NLTITSR	Hex(6)HexNAc(6)Fuc(1)	4565.9	4565.9	4	0.3	2	107.89	25.64
O60449	Lymphocyte antigen 75	517	IYEDEVPFGTNC*NLTITSR	Hex(6)HexNAc(6)Fuc(3)	4858.02	4859.01	4	-1.1	6.41	414.78	156.04
O60449	Lymphocyte antigen 75	517	IYEDEVPFGTNC*NLTITSR	Hex(7)HexNAc(4)	4175.74	4175.72	3	-4.5	5.53	325.16	123.91
O60449	Lymphocyte antigen 75	517	IYEDEVPFGTNC*NLTITSR	Hex(7)HexNAc(4)NeuAc(1)	4466.83	4466.81	3	-3.9	6.26	441.23	131.53
O60449	Lymphocyte antigen 75	517	IYEDEVPFGTNC*NLTITSR	Hex(9)HexNAc(2)	4093.68	4093.69	3	2.6	12.44	703.75	375.74
O60449	Lymphocyte antigen 75	517	IYEDEVPxFGTNC*NLTITSR	Hex(4)HexNAc(6)	4111.73	4112.74	3	1.4	2.27	225.2	70.33
O60449	Lymphocyte antigen 75	342	KPLNN+TVELTDVWTYSDTR	Hex(5)HexNAc(5)Fuc(1)NeuAc(1)	4515.92	4514.91	3	-1.4	2.13	275.5	16.74
O60449	Lymphocyte antigen 75	342	KPLNNTVELTDVWTYSDTR	Hex(5)HexNAc(5)Fuc(1)NeuAc(1)	4514.93	4515.96	3	4.2	6.56	480.02	95
O60449	Lymphocyte antigen 75	342	KPLNNTVELTDVWTYSDTR	Hex(5)HexNAc(5)Fuc(1)NeuAc(2)	4806.03	4805.02	3	-1.9	7.04	481.99	296.81
O60449	Lymphocyte antigen 75	342	KPLNNTVELTDVWTYSDTR	Hex(5)HexNAc(5)Fuc(2)NeuAc(1)	4660.99	4660.99	4	-0.5	5.89	316.21	10.99
O60449	Lymphocyte antigen 75	342	KPLNNTVELTDVWTYSDTR	Hex(6)HexNAc(6)Fuc(2)NeuAc(1)	5026.12	5026.14	4	3.6	2.49	230.74	22.64
O60449	Lymphocyte antigen 75	342	KPLNNTVELTDVWTYSDTR	Hex(8)HexNAc(2)	3954.7	3954.69	3	-3	5.3	383.76	192.93
O60449	Lymphocyte antigen 75	342	KPLNNTVELTDVWTYSDTR	Hex(9)HexNAc(2)	4116.75	4116.73	3	-4.6	5.38	389.15	106.56
O60449	Lymphocyte antigen 75	1099	QTLQNASETVK	Hex(5)HexNAc(5)Fuc(1)	3190.35	3190.35	3	-1	4.98	285.19	120.77
O60449	Lymphocyte antigen 75	1099	QTLQNASETVK	Hex(5)HexNAc(5)Fuc(1)NeuAc(2)	3772.54	3772.55	3	2.7	5.46	323.65	155.71
O60449	Lymphocyte antigen 75	1208	TVDC*NDNQ+PGAIC*YYSGNETEKEVKPVDSVK	Hex(5)HexNAc(5)Fuc(2)	5635.35	5636.33	4	-3.9	2.36	235.8	15.1
O60449	Lymphocyte antigen 75	1208	TVDC*NDNQ+PGAIC*YYSGNETEKEVKPVDSVK	Hex(5)HexNAc(5)NeuAc(1)	5634.33	5634.32	4	-1.6	2.2	250.95	15.1
O60449	Lymphocyte antigen 75	1208	TVDC*NDNQPGAIC*YYSGNETEK	Hex(5)HexNAc(5)Fuc(1)NeuAc(2)	5088.95	5087.93	4	-2.3	5.67	297.38	189.61
O60449	Lymphocyte antigen 75	1208	TVDC*NDNQPGAIC*YYSGNETEKEVKPVDSVK	Hex(10)HexNAc(2)	5543.28	5544.28	4	-0.6	5.11	319.72	111.02
O60449	Lymphocyte antigen 75	1208	TVDC*NDNQPGAIC*YYSGNETEKEVKPVDSVK	Hex(5)HexNAc(5)Fuc(1)	5488.31	5488.31	4	0.5	6.97	482.36	170.42
O60449	Lymphocyte antigen 75	1208	TVDC*NDNQPGAIC*YYSGNETEKEVKPVDSVK	Hex(5)HexNAc(5)Fuc(1)NeuAc(1)	5779.4	5779.4	4	-0.6	8.32	580.99	84.29
O60449	Lymphocyte antigen 75	1208	TVDC*NDNQPGAIC*YYSGNETEKEVKPVDSVK	Hex(5)HexNAc(5)Fuc(1)NeuAc(2)	6070.5	6070.5	4	-0.4	7.59	569.88	39.51
O60449	Lymphocyte antigen 75	1208	TVDC*NDNQPGAIC*YYSGNETEKEVKPVDSVK	Hex(5)HexNAc(5)Fuc(2)NeuAc(1)	5925.46	5924.46	4	0.2	7.07	461.23	58.7
O60449	Lymphocyte antigen 75	1208	TVDC*NDNQPGAIC*YYSGNETEKEVKPVDSVK	Hex(5)HexNAc(5)NeuAc(1)	5633.35	5633.35	4	0.3	2.28	250.94	29.13
O60449	Lymphocyte antigen 75	1208	TVDC*NDNQPGAIC*YYSGNETEKEVKPVDSVK	Hex(6)HexNAc(6)Fuc(2)NeuAc(1)	6290.59	6290.59	4	-1.3	5.57	328.97	39.45
O60449	Lymphocyte antigen 75	1208	TVDC*NDNQPGAIC*YYSGNETEKEVKPVDSVK	Hex(6)HexNAc(6)Fuc(2)NeuAc(2)	6581.69	6580.7	4	2.7	5.75	274.7	200.02
O60449	Lymphocyte antigen 75	1208	TVDC*NDNQPGAIC*YYSGNETEKEVKPVDSVK	Hex(9)HexNAc(2)	5381.22	5381.23	4	0.4	4.95	331.8	88.49
O60449	Lymphocyte antigen 75	933	YNVSSLEK	Hex(4)HexNAc(5)Fuc(1)	2749.14	2749.13	3	-4.6	4.29	301.51	105.2
O60449	Lymphocyte antigen 75	933	YNVSSLEK	Hex(5)HexNAc(5)Fuc(1)	2911.2	2911.19	3	-2.5	5.15	318.02	197.3
O60449	Lymphocyte antigen 75	933	YNVSSLEK	Hex(6)HexNAc(6)Fuc(1)	3276.33	3276.33	3	-0.1	2.95	247.62	128.76
O60487	Myelin protein zero-like protein 2	113	LQFDDNGTYTC*QVK	Hex(6)HexNAc(2)	3067.23	3067.24	3	1.4	13.29	768.57	479.95
O60487	Myelin protein zero-like protein 2	113	LQFDDNGTYTC*QVK	Hex(6)HexNAc(3)	3270.31	3270.32	3	1.5	6.25	435.48	251.03
O60487	Myelin protein zero-like protein 2	113	LQFDDNGTYTC*QVK	Hex(6)HexNAc(3)NeuAc(1)	3561.41	3561.42	3	2	6.55	536.52	254.8
O60487	Myelin protein zero-like protein 2	113	LQFDDNGTYTC*QVK	Hex(7)HexNAc(2)	3229.29	3229.29	3	0.3	12.31	713.94	465.8
O60487	Myelin protein zero-like protein 2	113	LQFDDNGTYTC*QVK	Hex(8)HexNAc(2)	3391.34	3391.34	3	0.7	10.41	668.29	372.86
O60487	Myelin protein zero-like protein 2	34	VLEAVNGTDAR	Hex(10)HexNAc(2)	3171.28	3171.3	2	4.4	6.16	452.73	282.7
O60487	Myelin protein zero-like protein 2	34	VLEAVNGTDAR	Hex(4)HexNAc(3)Fuc(1)NeuAc(1)	2839.2	2839.19	3	-1.4	5.39	406.64	134.71
O60487	Myelin protein zero-like protein 2	34	VLEAVNGTDAR	Hex(4)HexNAc(5)Fuc(1)	2954.26	2954.26	3	0.7	5.35	347.88	114.46
O60487	Myelin protein zero-like protein 2	34	VLEAVNGTDAR	Hex(5)HexNAc(4)Fuc(1)	2913.24	2913.24	3	2.7	4.42	266.05	100.14
O60487	Myelin protein zero-like protein 2	34	VLEAVNGTDAR	Hex(5)HexNAc(4)Fuc(1)NeuAc(1)	3204.33	3204.33	3	1.2	5.94	396.51	177.42
O60487	Myelin protein zero-like protein 2	34	VLEAVNGTDAR	Hex(5)HexNAc(5)Fuc(1)NeuAc(1)	3407.41	3407.41	3	1.3	5.61	362.67	132.48
O60487	Myelin protein zero-like protein 2	34	VLEAVNGTDAR	Hex(5)HexNAc(5)NeuAc(1)	3261.35	3261.36	3	2.5	2.72	237.27	76.29
O60487	Myelin protein zero-like protein 2	34	VLEAVNGTDAR	Hex(6)HexNAc(3)NeuAc(1)	3017.25	3017.24	3	-1	3.55	271.41	74.42
O60487	Myelin protein zero-like protein 2	34	VLEAVNGTDAR	Hex(9)HexNAc(2)	3009.23	3009.23	2	1.5	6.5	479.15	205.7
O60487	Myelin protein zero-like protein 2	104	YDASILLWK−LQFDDNGTYTC*QVK	Hex(7)HexNAc(6)Fuc(3)NeuAc(3)	6456.67	6455.68	6	3.1	2	206.92	206.92
O60494	Cubilin	97	GSAIGLPQNISSQIYQLNSK	Hex(8)HexNAc(2)	3820.7	3820.71	3	2.3	3.75	266.17	186.68
O60635	Tetraspanin-1	149	C*C*GFTNYTDFEDSPYFK	Hex(5)HexNAc(3)Fuc(1)NeuAc(1)	4007.5	4006.49	3	-2.9	5	262.09	133.3
O60635	Tetraspanin-1	149	C*C*GFTNYTDFEDSPYFK	Hex(8)HexNAc(2)	3853.43	3853.43	3	1.4	6.18	350.62	221.12
O60637	Tetraspanin-3	164	ETKNQSVPLSC*C*R	Hex(5)HexNAc(3)Fuc(1)	3144.3	3144.3	3	1.3	3.47	259.27	96.2
O60637	Tetraspanin-3	164	ETKNQSVPLSC*C*R	Hex(3)HexNAc(3)Fuc(1)	2820.19	2820.18	3	-3	5.47	404.43	230.68
O60637	Tetraspanin-3	164	ETKNQSVPLSC*C*R	Hex(4)HexNAc(3)Fuc(1)	2982.24	2982.25	3	2.1	5.41	354.15	156.99
O60637	Tetraspanin-3	167	NQSVPLSC*C*R	Hex(10)HexNAc(2)	3247.24	3247.25	3	3.3	5.81	404.83	231.96
O60637	Tetraspanin-3	167	NQSVPLSC*C*R	Hex(3)HexNAc(5)Fuc(1)	2868.16	2868.17	3	2	5.75	343.89	161.82
O60637	Tetraspanin-3	167	NQSVPLSC*C*R	Hex(4)HexNAc(3)Fuc(1)NeuAc(1)	2915.15	2915.16	3	1.6	2.5	239.05	86.01
O60637	Tetraspanin-3	167	NQSVPLSC*C*R	Hex(4)HexNAc(4)Fuc(1)	2827.14	2827.13	3	-2	5.32	358.97	132.01
O60637	Tetraspanin-3	167	NQSVPLSC*C*R	Hex(4)HexNAc(5)Fuc(1)	3030.22	3030.23	3	3.1	5.11	287.94	187.91
O60637	Tetraspanin-3	167	NQSVPLSC*C*R	Hex(4)HexNAc(6)Fuc(1)	3233.3	3233.3	3	1.5	4.72	285.9	91.82
O60637	Tetraspanin-3	167	NQSVPLSC*C*R	Hex(5)HexNAc(2)	2436.97	2436.97	2	-0.5	6.74	512.76	311.2
O60637	Tetraspanin-3	167	NQSVPLSC*C*R	Hex(5)HexNAc(3)Fuc(1)	2786.11	2786.11	3	0.2	5.48	347.97	134.38
O60637	Tetraspanin-3	167	NQSVPLSC*C*R	Hex(5)HexNAc(3)Fuc(1)NeuAc(1)	3077.21	3077.2	3	-0.5	5.76	346.61	165.16
O60637	Tetraspanin-3	167	NQSVPLSC*C*R	Hex(5)HexNAc(3)NeuAc(1)	2931.15	2931.14	3	-1.7	5.25	360.42	111.74
O60637	Tetraspanin-3	167	NQSVPLSC*C*R	Hex(5)HexNAc(4)	2843.13	2843.13	2	0	2.16	229.9	37.49
O60637	Tetraspanin-3	167	NQSVPLSC*C*R	Hex(5)HexNAc(4)Fuc(1)	2989.19	2989.2	3	2.3	5.55	354.68	140.18
O60637	Tetraspanin-3	167	NQSVPLSC*C*R	Hex(6)HexNAc(2)	2599.03	2599.04	3	3.9	6.29	511.74	312.3
O60637	Tetraspanin-3	167	NQSVPLSC*C*R	Hex(6)HexNAc(3)NeuAc(1)	3093.2	3093.21	3	1.2	6.03	377.25	210.14
O60637	Tetraspanin-3	167	NQSVPLSC*C*R	Hex(7)HexNAc(2)	2761.08	2761.08	3	-1	5.68	407.39	192.44
O60637	Tetraspanin-3	167	NQSVPLSC*C*R	Hex(8)HexNAc(2)	2923.13	2923.14	3	1.8	6.03	402.23	234.8
O60637	Tetraspanin-3	167	NQSVPLSC*C*R	Hex(9)HexNAc(2)	3085.19	3085.19	3	1.8	6.08	387.81	233.44
O60637	Tetraspanin-3	167	NQSVPLSC*C*R	Hex(3)HexNAc(3)Fuc(1)	2462.01	2462	2	-0.8	6.42	465.73	211.28
O60637	Tetraspanin-3	167	NQSVPLSC*C*R	Hex(4)HexNAc(3)	2478	2478	3	-0.3	2.25	201.96	98.99
O60637	Tetraspanin-3	167	NQSVPLSC*C*R	Hex(4)HexNAc(3)Fuc(1)	2624.06	2624.06	3	-0.7	5.29	400	109.27
O60637	Tetraspanin-3	167	NQSVPLSC*C*R	Hex(4)HexNAc(3)NeuAc(1)	2769.1	2769.09	3	-0.9	4.35	270.91	95.63
O60637	Tetraspanin-3	167	NQSVPLSC*C*R	Hex(5)HexNAc(6)Fuc(1)	3395.35	3395.37	3	4.9	3.26	254.41	110.83
O60637	Tetraspanin-3	125	TYNGTNPDAASR	Hex(9)HexNAc(2)	3131.21	3131.21	3	1.3	6.56	453.05	325.44
O75054	Immunoglobulin superfamily member 3	688	TLTLVENKPIQLNC*SVK	Hex(5)HexNAc(4)	3579.66	3579.67	3	3.4	2.2	218.12	184.85
O75054	Immunoglobulin superfamily member 3	688	TLTLVENKPIQLNC*SVK	Hex(6)HexNAc(4)	3741.71	3741.72	3	3	4.87	320.54	193.08
O75054	Immunoglobulin superfamily member 3	688	TLTLVENKPIQLNC*SVK	Hex(7)HexNAc(2)	3497.61	3497.6	3	-3.4	6.5	469.65	236.44
O75054	Immunoglobulin superfamily member 3	688	TLTLVENKPIQLNC*SVK	Hex(8)HexNAc(2)	3659.66	3659.67	3	3	6.31	370.86	237.76
O75054	Immunoglobulin superfamily member 3	98	VQGNSTLLHITDLQAR	Hex(3)HexNAc(5)Fuc(1)	3413.57	3413.59	3	4.9	6.31	453.48	295.09
O75054	Immunoglobulin superfamily member 3	98	VQGNSTLLHITDLQAR	Hex(4)HexNAc(5)	3429.56	3429.56	3	0.1	4.61	287.75	177.04
O75054	Immunoglobulin superfamily member 3	98	VQGNSTLLHITDLQAR	Hex(4)HexNAc(5)Fuc(1)	3575.62	3575.63	3	1.3	5.95	495.44	262.84
O75197	Low-density lipoprotein receptor-related protein 5	132	IEVANLNGTSR	Hex(9)HexNAc(2)	3038.26	3038.26	2	1.8	3.54	280.53	129.44
O75197	Low-density lipoprotein receptor-related protein 5	940	NC*SPPTTFLLFSQK	Hex(5)HexNAc(5)Fuc(1)NeuAc(1)	3902.63	3902.64	3	2.4	3.45	264.68	155.45
O75309	Cadherin-16	598	FSLVNDSEGWLC*IEK	Hex(5)HexNAc(5)Fuc(1)NeuAc(2)	4350.76	4350.77	3	0.7	3.01	278.66	12.59
O75718	Cartilage-associated protein	87	NC*SAAPQPEPAAGLASYPELR	Hex(6)HexNAc(2)	3577.53	3577.53	3	2.2	6.01	327.15	114.59
O75882	Attractin	1080	C*ENLTTGK	Hex(8)HexNAc(2)	2625.01	2625.02	2	3.9	5.98	430.67	248.6
O75882	Attractin	1080	C*ENLTTGK	Hex(9)HexNAc(2)	2787.06	2787.06	2	-0.1	6.12	377.53	205.32
O75882	Attractin	1071	C*INQSIC*EK	Hex(8)HexNAc(2)	2854.1	2854.11	2	3.9	5.17	306.84	150.29
O75882	Attractin	1192	DLDMFINASK	Hex(9)HexNAc(2)	3018.19	3018.18	2	-1.9	5.87	343.63	211.23
O75882	Attractin	378	EWLPLNR	Hex(8)HexNAc(2)	2630.09	2630.09	2	0.9	5.81	322.88	144.96
O75882	Attractin	378	EWLPLNR	Hex(9)HexNAc(2)	2792.14	2792.14	2	2	5.93	417.12	191.78
O75882	Attractin	306	GC*SC*FSDWQ+GPGC*SVPVPANQSFWTR	Hex(9)HexNAc(2)	4852.88	4851.87	3	-2.3	2.88	223.83	35.61
O75882	Attractin	297	GIC*NSSDVR	Hex(7)HexNAc(2)	2547.99	2547.99	2	-0.2	4.74	266.09	108.56
O75882	Attractin	297	GIC*NSSDVR	Hex(8)HexNAc(2)	2710.04	2710.05	2	2.3	6.24	424.47	232.86
O75882	Attractin	297	GIC*NSSDVR	Hex(9)HexNAc(2)	2872.09	2872.1	2	1.5	6.32	458.38	199.17
O75882	Attractin	411	IDSTGNVTNELR	Hex(7)HexNAc(2)	2859.19	2859.19	3	0.3	6.59	524.39	244.91
O75882	Attractin	411	IDSTGNVTNELR	Hex(8)HexNAc(2)	3021.24	3021.24	3	-0.3	6.61	522.27	269.48
O75882	Attractin	411	IDSTGNVTNELR	Hex(9)HexNAc(2)	3183.29	3183.29	3	-0.8	6.6	540.12	257.13
O75882	Attractin	262	ISNSSDTVEC*EC*SEN+WKGEAC*DIPHC*TDNC*GFPHR	Hex(9)HexNAc(2)	6034.28	6035.3	5	3.2	7.76	473.89	12.73
O75882	Attractin	262	ISNSSDTVEC*EC*SENWKGEAC*DIPHC*TDNC*GFPHR	Hex(3)HexNAc(6)	5873.29	5873.28	5	-2.6	5.93	414.39	144.42
O75882	Attractin	262	ISNSSDTVEC*EC*SENWKGEAC*DIPHC*TDNC*GFPHR	Hex(8)HexNAc(2)	5871.24	5872.23	5	-2.1	6.55	434.07	148.19
O75882	Attractin	262	ISNSSDTVEC*EC*SENWKGEAC*DIPHC*TDNC*GFPHR	Hex(9)HexNAc(2)	6033.29	6032.26	5	-4.2	7.77	488.94	450.29
O75882	Attractin	731	NHSC*SEGQISIFR	Hex(7)HexNAc(2)	3075.24	3075.23	3	-0.2	5.52	382.39	100.17
O75882	Attractin	731	NHSC*SEGQISIFR	Hex(8)HexNAc(2)	3237.29	3237.29	3	-0.1	6.27	449.37	148.71
O75882	Attractin	731	NHSC*SEGQISIFR	Hex(9)HexNAc(2)	3399.34	3399.35	3	3	6.16	474.65	185.78
O75882	Attractin	423	VFHIHNESWVLLTPK	Hex(9)HexNAc(2)	3684.62	3684.62	4	0.9	7.08	532.5	303.62
O75882	Attractin	1053	YNWSFIHC*PAC*QC*N+GHSK	Hex(8)HexNAc(2)	3969.5	3969.51	4	1.9	8.24	531.13	52.15
O75882	Attractin	1053	YNWSFIHC*PAC*QC*N+GHSK	Hex(9)HexNAc(2)	4131.56	4131.56	4	2	8.19	513.64	54.91
O75976	Carboxypeptidase D	1062	DLDTDFTNNASQPETK	Hex(4)HexNAc(5)Fuc(1)	3605.46	3605.47	3	1.9	5.02	262.37	134.58
O75976	Carboxypeptidase D	1062	DLDTDFTNNASQPETK	Hex(5)HexNAc(5)Fuc(1)	3767.52	3767.52	3	1.1	5.09	257.04	154.78
O75976	Carboxypeptidase D	516	FANEYPNITR	Hex(5)HexNAc(5)Fuc(1)NeuAc(2)	3778.51	3778.52	3	2.3	5.68	372.41	155.48
O75976	Carboxypeptidase D	516	FANEYPNITR	Hex(9)HexNAc(2)	3089.23	3089.24	3	0.3	5.7	306.73	221.83
O75976	Carboxypeptidase D	808	GILNATISVAEINHPVTTYK	Hex(4)HexNAc(5)NeuAc(1)	4095.86	4095.84	3	-4.9	2.48	241.18	91
O75976	Carboxypeptidase D	808	GILNATISVAEINHPVTTYK	Hex(5)HexNAc(5)	3966.82	3966.84	3	3.9	6.19	397.05	299.5
O75976	Carboxypeptidase D	808	GILNATISVAEINHPVTTYK	Hex(5)HexNAc(5)NeuAc(1)	4257.92	4257.93	3	2.5	6.94	516.66	99.38
O75976	Carboxypeptidase D	808	GILNATISVAEINHPVTTYK	Hex(6)HexNAc(3)NeuAc(1)	4013.81	4013.82	3	2.2	6.51	436.34	81.91
O75976	Carboxypeptidase D	808	GILNATISVAEINHPVTTYK	Hex(6)HexNAc(4)	3925.79	3925.8	3	2.3	6.82	509.95	264.91
O75976	Carboxypeptidase D	808	GILNATISVAEINHPVTTYK	Hex(6)HexNAc(4)Fuc(1)	4071.85	4070.86	3	3.6	5.31	326.09	178.69
O75976	Carboxypeptidase D	808	GILNATISVAEINHPVTTYK	Hex(7)HexNAc(4)	4087.85	4087.86	3	3.3	6.68	480.55	286.49
O75976	Carboxypeptidase D	808	GILNATISVAEINHPVTTYK	Hex(9)HexNAc(2)	4005.79	4004.8	3	2.2	7.18	509.56	300.35
O75976	Carboxypeptidase D	1060	GKDLDTDFTNNASQPETK	Hex(4)HexNAc(2)Fuc(1)	3181.34	3181.34	3	-1	5.31	345.24	136.64
O75976	Carboxypeptidase D	1060	GKDLDTDFTNNASQPETK	Hex(4)HexNAc(3)Fuc(1)NeuAc(1)	3675.52	3675.52	3	0.6	8.88	603.76	273.67
O75976	Carboxypeptidase D	1060	GKDLDTDFTNNASQPETK	Hex(4)HexNAc(5)Fuc(1)	3790.58	3790.58	3	-0.8	13.12	750.78	471.74
O75976	Carboxypeptidase D	1060	GKDLDTDFTNNASQPETK	Hex(4)HexNAc(5)Fuc(1)NeuAc(1)	4081.68	4081.68	3	0.5	6.4	515.81	78.02
O75976	Carboxypeptidase D	1060	GKDLDTDFTNNASQPETK	Hex(4)HexNAc(5)Fuc(2)	3936.64	3936.64	3	1.5	2.47	226.28	109.2
O75976	Carboxypeptidase D	1060	GKDLDTDFTNNASQPETK	Hex(5)HexNAc(3)Fuc(1)NeuAc(1)	3837.57	3837.56	3	-2.4	5.41	370.01	153.67
O75976	Carboxypeptidase D	1060	GKDLDTDFTNNASQPETK	Hex(5)HexNAc(4)Fuc(1)	3749.55	3749.55	3	0	6.56	556.38	252.77
O75976	Carboxypeptidase D	1060	GKDLDTDFTNNASQPETK	Hex(5)HexNAc(4)Fuc(1)NeuAc(1)	4040.65	4039.64	3	-0.3	6	402.1	187.56
O75976	Carboxypeptidase D	1060	GKDLDTDFTNNASQPETK	Hex(5)HexNAc(4)Fuc(1)NeuAc(2)	4331.74	4330.74	3	-0.3	5.55	396.05	115.81
O75976	Carboxypeptidase D	1060	GKDLDTDFTNNASQPETK	Hex(5)HexNAc(5)Fuc(1)	3952.63	3952.64	3	0.7	11.23	684.62	412.77
O75976	Carboxypeptidase D	1060	GKDLDTDFTNNASQPETK	Hex(5)HexNAc(5)Fuc(1)NeuAc(1)	4243.73	4243.73	3	0.7	8.99	645.64	101.63
O75976	Carboxypeptidase D	1060	GKDLDTDFTNNASQPETK	Hex(5)HexNAc(5)Fuc(1)NeuAc(2)	4534.82	4534.83	3	0.7	6.38	489.52	57.73
O75976	Carboxypeptidase D	1060	GKDLDTDFTNNASQPETK	Hex(5)HexNAc(5)Fuc(2)	4098.69	4099.69	3	-2	6.19	488.42	150.24
O75976	Carboxypeptidase D	1060	GKDLDTDFTNNASQPETK	Hex(5)HexNAc(5)Fuc(2)NeuAc(1)	4389.79	4389.81	3	4.6	3.42	322.07	64.48
O75976	Carboxypeptidase D	1060	GKDLDTDFTNNASQPETK	Hex(6)HexNAc(6)Fuc(1)	4317.77	4317.78	3	3	5.91	441.42	162.61
O75976	Carboxypeptidase D	945	GLVMNYPxHITNLTNLGQSTEYR	Hex(6)HexNAc(2)	3915.72	3915.72	3	-0.5	2.02	255.46	26.79
O75976	Carboxypeptidase D	945	GLVMNYPxHITNLTNLGQSTEYR	Hex(7)HexNAc(2)	4077.77	4077.78	3	0.4	5.79	411.64	242.6
O75976	Carboxypeptidase D	945	GLVMNYPxHITNLTNLGQSTEYR	Hex(8)HexNAc(2)	4239.83	4240.85	3	3.6	6.71	445.9	309.4
O75976	Carboxypeptidase D	945	GLVMNYPxHITNLTNLGQSTEYR	Hex(9)HexNAc(2)	4401.88	4401.88	3	-0.9	2.86	231.21	125.24
O75976	Carboxypeptidase D	967	HIWSLEISN+KPNVSEPEEPK	Hex(4)HexNAc(5)NeuAc(1)	4288.86	4288.89	4	4.9	2.86	251.53	13.1
O75976	Carboxypeptidase D	967	HIWSLEISNKPNVSEPEEPK	Hex(10)HexNAc(2)	4359.86	4360.88	4	2.8	6.58	455.71	259.44
O75976	Carboxypeptidase D	967	HIWSLEISNKPNVSEPEEPK	Hex(4)HexNAc(5)Fuc(1)	4142.84	4142.84	4	-0.6	11.64	683.57	170.52
O75976	Carboxypeptidase D	967	HIWSLEISNKPNVSEPEEPK	Hex(4)HexNAc(5)Fuc(1)NeuAc(1)	4433.94	4432.95	4	3	11.74	686.21	420.24
O75976	Carboxypeptidase D	967	HIWSLEISNKPNVSEPEEPK	Hex(4)HexNAc(6)Fuc(4)	4784.1	4783.1	4	2.1	5.91	368.63	229.22
O75976	Carboxypeptidase D	967	HIWSLEISNKPNVSEPEEPK	Hex(5)HexNAc(4)Fuc(1)	4101.82	4101.81	4	-0.6	6.49	393.93	223.04
O75976	Carboxypeptidase D	967	HIWSLEISNKPNVSEPEEPK	Hex(5)HexNAc(4)Fuc(1)NeuAc(1)	4392.91	4392.93	4	3.7	6.68	534.6	65.58
O75976	Carboxypeptidase D	967	HIWSLEISNKPNVSEPEEPK	Hex(5)HexNAc(4)Fuc(1)NeuAc(2)	4684.01	4682.99	4	-3.4	3.6	291.37	88.1
O75976	Carboxypeptidase D	967	HIWSLEISNKPNVSEPEEPK	Hex(5)HexNAc(5)Fuc(1)	4304.9	4304.91	4	4.4	13.3	761.62	404.49
O75976	Carboxypeptidase D	967	HIWSLEISNKPNVSEPEEPK	Hex(5)HexNAc(5)Fuc(1)NeuAc(1)	4595.99	4595.99	4	0.4	13.72	765.28	70.9
O75976	Carboxypeptidase D	967	HIWSLEISNKPNVSEPEEPK	Hex(5)HexNAc(5)Fuc(1)NeuAc(2)	4887.09	4886.09	4	0.6	7.81	572.42	340.81
O75976	Carboxypeptidase D	967	HIWSLEISNKPNVSEPEEPK	Hex(5)HexNAc(5)Fuc(2)	4450.95	4450.96	4	1.6	6.89	480.7	270.94
O75976	Carboxypeptidase D	967	HIWSLEISNKPNVSEPEEPK	Hex(5)HexNAc(5)Fuc(2)NeuAc(1)	4742.05	4742.05	4	-0.5	7.02	520.1	70.11
O75976	Carboxypeptidase D	967	HIWSLEISNKPNVSEPEEPK	Hex(5)HexNAc(6)Fuc(1)NeuAc(1)	4799.07	4800.08	4	1.2	4.75	295.79	45.95
O75976	Carboxypeptidase D	967	HIWSLEISNKPNVSEPEEPK	Hex(5)HexNAc(6)Fuc(2)	4654.03	4654.05	4	2.8	5.97	455.81	274.33
O75976	Carboxypeptidase D	967	HIWSLEISNKPNVSEPEEPK	Hex(6)HexNAc(5)Fuc(1)NeuAc(1)	4758.04	4757.03	4	-2.2	2.66	241.12	89.24
O75976	Carboxypeptidase D	967	HIWSLEISNKPNVSEPEEPK	Hex(6)HexNAc(5)Fuc(2)NeuAc(1)	4904.1	4904.13	4	4.7	2.21	259.59	38.78
O75976	Carboxypeptidase D	967	HIWSLEISNKPNVSEPEEPK	Hex(6)HexNAc(5)NeuAc(1)	4611.99	4611.01	4	5.2	2.99	224.27	116.45
O75976	Carboxypeptidase D	967	HIWSLEISNKPNVSEPEEPK	Hex(6)HexNAc(6)Fuc(1)NeuAc(1)	4961.12	4961.12	4	-0.5	5.33	362.96	88
O75976	Carboxypeptidase D	967	HIWSLEISNKPNVSEPEEPK	Hex(6)HexNAc(6)Fuc(1)NeuAc(2)	5252.22	5252.2	4	-3	6.68	538.07	182.94
O75976	Carboxypeptidase D	967	HIWSLEISNKPNVSEPEEPK	Hex(6)HexNAc(6)Fuc(2)	4816.09	4816.08	4	-1.2	5.85	461.61	45.48
O75976	Carboxypeptidase D	967	HIWSLEISNKPNVSEPEEPK	Hex(6)HexNAc(6)Fuc(2)NeuAc(1)	5107.18	5107.18	4	-0.4	8.46	598.63	75.32
O75976	Carboxypeptidase D	967	HIWSLEISNKPNVSEPEEPK	Hex(6)HexNAc(6)Fuc(3)NeuAc(1)	5253.24	5252.26	4	4.6	6.58	430.68	230.49
O75976	Carboxypeptidase D	967	HIWSLEISNKPNVSEPEEPK	Hex(9)HexNAc(2)	4197.81	4197.82	4	2.3	10.54	608.44	359.7
O75976	Carboxypeptidase D	170	LLNTTDVYLLPSLN+PDGFER	Hex(4)HexNAc(4)Fuc(2)NeuAc(1)	4321.9	4320.88	3	-2.8	5.76	316.99	185.31
O75976	Carboxypeptidase D	170	LLNTTDVYLLPSLN+PDGFER	Hex(5)HexNAc(5)NeuAc(2)	4686.01	4685.99	4	-4	2.48	202.2	194.69
O75976	Carboxypeptidase D	170	LLNTTDVYLLPSLN+PDGFER	Hex(6)HexNAc(5)Fuc(3)NeuAc(1)	4995.14	4996.17	4	4.4	2.27	129.43	89.43
O75976	Carboxypeptidase D	170	LLNTTDVYLLPSLNPDGFER	Hex(10)HexNAc(2)	4303.86	4303.88	3	3.9	9.24	593.14	432.21
O75976	Carboxypeptidase D	170	LLNTTDVYLLPSLNPDGFER	Hex(4)HexNAc(5)Fuc(1)	4086.84	4086.86	3	4	6.19	367.06	281.26
O75976	Carboxypeptidase D	170	LLNTTDVYLLPSLNPDGFER	Hex(4)HexNAc(5)Fuc(1)NeuAc(1)	4377.94	4376.92	3	-2.4	6.47	396.08	319.92
O75976	Carboxypeptidase D	170	LLNTTDVYLLPSLNPDGFER	Hex(4)HexNAc(5)Fuc(3)	4378.96	4378.96	3	1.1	6.3	344.82	290.73
O75976	Carboxypeptidase D	170	LLNTTDVYLLPSLNPDGFER	Hex(5)HexNAc(4)Fuc(1)NeuAc(1)	4336.91	4336.91	3	0	7.1	548.96	49.15
O75976	Carboxypeptidase D	170	LLNTTDVYLLPSLNPDGFER	Hex(5)HexNAc(4)Fuc(2)NeuAc(1)	4482.97	4482.98	4	1.4	5.22	231.24	199.26
O75976	Carboxypeptidase D	170	LLNTTDVYLLPSLNPDGFER	Hex(5)HexNAc(5)Fuc(1)	4248.9	4248.91	3	2.5	10.44	642.83	438.17
O75976	Carboxypeptidase D	170	LLNTTDVYLLPSLNPDGFER	Hex(5)HexNAc(5)Fuc(1)NeuAc(1)	4539.99	4540	4	1.1	12.68	734.99	31.75
O75976	Carboxypeptidase D	170	LLNTTDVYLLPSLNPDGFER	Hex(5)HexNAc(5)Fuc(1)NeuAc(2)	4831.09	4831.09	3	0.7	11.65	665.11	30.12
O75976	Carboxypeptidase D	170	LLNTTDVYLLPSLNPDGFER	Hex(5)HexNAc(5)Fuc(2)	4394.95	4394.97	4	4.9	7.82	482.49	398.14
O75976	Carboxypeptidase D	170	LLNTTDVYLLPSLNPDGFER	Hex(5)HexNAc(5)Fuc(2)NeuAc(1)	4686.05	4686.05	4	1.1	13.68	755.03	31.82
O75976	Carboxypeptidase D	170	LLNTTDVYLLPSLNPDGFER	Hex(5)HexNAc(5)Fuc(3)	4541.01	4540.03	3	4.5	5.8	305.33	216.68
O75976	Carboxypeptidase D	170	LLNTTDVYLLPSLNPDGFER	Hex(5)HexNAc(5)Fuc(3)NeuAc(1)	4832.11	4832.12	4	2.8	6.64	473.67	65.4
O75976	Carboxypeptidase D	170	LLNTTDVYLLPSLNPDGFER	Hex(5)HexNAc(6)NeuAc(1)	4597.01	4596.03	3	5.2	5.44	279.15	186.78
O75976	Carboxypeptidase D	170	LLNTTDVYLLPSLNPDGFER	Hex(6)HexNAc(4)Fuc(1)NeuAc(1)	4498.96	4497.98	3	4.1	5.51	268.05	212.8
O75976	Carboxypeptidase D	170	LLNTTDVYLLPSLNPDGFER	Hex(6)HexNAc(5)Fuc(1)	4410.95	4411.97	4	4.6	5.16	255.42	210.29
O75976	Carboxypeptidase D	170	LLNTTDVYLLPSLNPDGFER	Hex(6)HexNAc(5)Fuc(1)NeuAc(1)	4702.04	4702.06	4	4.6	10.28	646.15	18.72
O75976	Carboxypeptidase D	170	LLNTTDVYLLPSLNPDGFER	Hex(6)HexNAc(5)Fuc(1)NeuAc(2)	4993.14	4992.14	4	1.9	6.74	351.04	290.5
O75976	Carboxypeptidase D	170	LLNTTDVYLLPSLNPDGFER	Hex(6)HexNAc(5)Fuc(2)	4557.01	4557.02	4	2.8	12.47	737.43	527.42
O75976	Carboxypeptidase D	170	LLNTTDVYLLPSLNPDGFER	Hex(6)HexNAc(5)Fuc(2)NeuAc(1)	4848.1	4848.12	4	3.5	10.44	618.76	30.6
O75976	Carboxypeptidase D	170	LLNTTDVYLLPSLNPDGFER	Hex(6)HexNAc(5)Fuc(3)	4703.06	4702.07	3	1.9	6.47	350.84	243.36
O75976	Carboxypeptidase D	170	LLNTTDVYLLPSLNPDGFER	Hex(6)HexNAc(5)Fuc(4)	4849.12	4850.12	4	-1	6.33	341.37	218.6
O75976	Carboxypeptidase D	170	LLNTTDVYLLPSLNPDGFER	Hex(6)HexNAc(5)NeuAc(2)	4847.08	4846.09	4	2.9	5.53	245.76	215.68
O75976	Carboxypeptidase D	170	LLNTTDVYLLPSLNPDGFER	Hex(6)HexNAc(6)Fuc(1)NeuAc(1)	4905.12	4905.14	4	2.7	10.47	626.12	23.14
O75976	Carboxypeptidase D	170	LLNTTDVYLLPSLNPDGFER	Hex(6)HexNAc(6)Fuc(1)NeuAc(2)	5196.22	5195.23	4	2.9	9.72	593.53	429.4
O75976	Carboxypeptidase D	170	LLNTTDVYLLPSLNPDGFER	Hex(6)HexNAc(6)Fuc(2)NeuAc(1)	5051.18	5051.19	4	2.1	8.18	470	28.28
O75976	Carboxypeptidase D	170	LLNTTDVYLLPSLNPDGFER	Hex(6)HexNAc(6)Fuc(3)	4906.14	4905.16	4	5.1	6.94	423.14	360.04
O75976	Carboxypeptidase D	170	LLNTTDVYLLPSLNPDGFER	Hex(6)HexNAc(6)Fuc(3)NeuAc(1)	5197.24	5196.24	3	0.8	5.58	256.12	10.37
O75976	Carboxypeptidase D	170	LLNTTDVYLLPSLNPDGFER	Hex(6)HexNAc(6)Fuc(4)	5052.2	5051.22	4	3.8	7.78	395.06	338.18
O75976	Carboxypeptidase D	170	LLNTTDVYLLPSLNPDGFER	Hex(6)HexNAc(6)NeuAc(2)	5050.16	5049.18	4	5.2	6.75	420.61	358.31
O75976	Carboxypeptidase D	170	LLNTTDVYLLPSLNPDGFER	Hex(7)HexNAc(4)Fuc(3)NeuAc(1)	4953.13	4954.13	4	-1.3	2.66	205.15	194.92
O75976	Carboxypeptidase D	170	LLNTTDVYLLPSLNPDGFER	Hex(7)HexNAc(5)Fuc(2)	4719.06	4719.08	4	3.6	5.64	280.65	237.12
O75976	Carboxypeptidase D	170	LLNTTDVYLLPSLNPDGFER	Hex(7)HexNAc(5)Fuc(2)NeuAc(1)	5010.15	5010.17	4	3.9	2.5	162.74	147.58
O75976	Carboxypeptidase D	170	LLNTTDVYLLPSLNPDGFER	Hex(7)HexNAc(5)NeuAc(1)	4718.04	4719.03	3	-3.4	2.53	210.16	165.91
O75976	Carboxypeptidase D	170	LLNTTDVYLLPSLNPDGFER	Hex(7)HexNAc(6)Fuc(2)	4922.14	4923.16	4	4.2	6.15	355.69	290.89
O75976	Carboxypeptidase D	170	LLNTTDVYLLPSLNPDGFER	Hex(7)HexNAc(6)Fuc(3)	5068.2	5068.2	4	1.7	6.5	383.59	294.44
O75976	Carboxypeptidase D	170	LLNTTDVYLLPSLNPDGFER	Hex(8)HexNAc(2)	3979.76	3979.77	3	4.1	9.24	589.77	425.84
O75976	Carboxypeptidase D	170	LLNTTDVYLLPSLNPDGFER	Hex(9)HexNAc(2)	4141.81	4141.82	3	3.6	14.35	809.91	517.57
O75976	Carboxypeptidase D	170	LLNTTDVYLLPSLNPDGFER	Hex(4)HexNAc(6)	4159.86	4158.87	3	2.6	3.77	232.41	194.98
O75976	Carboxypeptidase D	167	LVR−LLNTTDVYLLPSLNPDGFER	Hex(4)HexNAc(5)Fuc(3)NeuAc(1)	5052.32	5053.35	3	4.3	2	154.11	154.11
O75976	Carboxypeptidase D	626	NN+SNNFDLNR	Hex(6)HexNAc(3)	2790.08	2790.09	3	1.8	2	145.55	15.51
O75976	Carboxypeptidase D	626	NNSNNFDLNR	Hex(5)HexNAc(3)	2627.05	2627.05	3	-0.7	2.7	242.74	47.07
O75976	Carboxypeptidase D	626	NNSNNFDLNR	Hex(5)HexNAc(3)NeuAc(1)	2918.14	2918.14	3	0.1	5.8	341.25	174.29
O75976	Carboxypeptidase D	626	NNSNNFDLNR	Hex(5)HexNAc(5)NeuAc(1)	3324.3	3324.3	3	-0.9	5.25	385.87	88.62
O75976	Carboxypeptidase D	626	NNSNNFDLNR	Hex(6)HexNAc(3)NeuAc(1)	3080.2	3080.19	3	-0.8	5.2	403.86	89.54
O75976	Carboxypeptidase D	626	NNSNNFDLNR	Hex(6)HexNAc(4)Fuc(1)NeuAc(1)	3429.33	3429.32	3	-2.6	2.58	319.35	27.76
O75976	Carboxypeptidase D	626	NNSNNFDLNR	Hex(6)HexNAc(4)NeuAc(1)	3283.27	3283.28	3	1.1	4.23	384.01	40.57
O75976	Carboxypeptidase D	626	NNSNNFDLNR	Hex(7)HexNAc(4)Fuc(2)	3446.35	3446.35	3	-0.7	3.43	264.65	75.4
O75976	Carboxypeptidase D	626	NNSNNFDLNR	Hex(7)HexNAc(4)NeuAc(1)	3445.33	3445.33	3	-0.7	2.49	267.96	72.4
O75976	Carboxypeptidase D	626	NNSNNFDLNR	Hex(9)HexNAc(2)	3072.18	3072.18	3	-1.1	4.07	234.11	140.57
O75976	Carboxypeptidase D	855	NVTVK	Hex(4)HexNAc(5)Fuc(1)	2370.01	2370.01	2	2.5	2.73	388.91	56.06
O75976	Carboxypeptidase D	855	NVTVK	Hex(5)HexNAc(5)Fuc(1)	2532.06	2532.06	2	1.4	2.76	357.36	57.86
O75976	Carboxypeptidase D	855	NVTVK	Hex(5)HexNAc(5)Fuc(1)NeuAc(1)	2823.15	2823.16	2	1.7	2.87	386.85	58.5
O75976	Carboxypeptidase D	855	NVTVK	Hex(5)HexNAc(5)Fuc(1)NeuAc(2)	3114.25	3114.25	3	0.2	2.58	324.72	47.31
O75976	Carboxypeptidase D	855	NVTVK	Hex(5)HexNAc(5)Fuc(2)	2678.12	2678.12	3	-0.4	2.32	275.69	51.16
O75976	Carboxypeptidase D	855	NVTVK	Hex(5)HexNAc(5)Fuc(2)NeuAc(1)	2969.21	2969.21	3	0	2.57	290.91	61.15
O75976	Carboxypeptidase D	855	NVTVK	Hex(5)HexNAc(5)NeuAc(2)	2968.19	2968.21	3	4.7	2.04	274.92	31.67
O75976	Carboxypeptidase D	855	NVTVK	Hex(6)HexNAc(6)Fuc(1)NeuAc(1)	3188.29	3188.28	3	-3.2	2.2	272.12	48.01
O75976	Carboxypeptidase D	515	RFANEYPNITR	Hex(5)HexNAc(5)Fuc(2)NeuAc(1)	3789.57	3789.57	4	-1.4	2.12	208.25	141.74
O75976	Carboxypeptidase D	860	SEGAIQ+VNFTLVR	Hex(5)HexNAc(5)Fuc(1)NeuAc(2)	3988.67	3988.67	2	1.6	2.3	251.82	16.99
O95297	Myelin protein zero-like protein 1	45	EIFVANGTQGK	Hex(5)HexNAc(5)Fuc(1)NeuAc(1)	3426.42	3426.43	2	1.9	6.09	401.04	208.38
O95445	Apolipoprotein M	121	TELFSSSC*PGGIMLNETGQ+GYQR	Hex(4)HexNAc(6)	4399.82	4398.8	3	-3.8	4.72	289.52	65.89
O95445	Apolipoprotein M	121	TELFSSSC*PGGIMLNETGQGYQR	Hex(5)HexNAc(4)	4154.73	4153.74	3	3.4	3.07	278.13	126.65
O95445	Apolipoprotein M	121	TELFSSSC*PGGIMLNETGQGYQR	Hex(7)HexNAc(2)	4072.68	4072.66	3	-3.7	5	289.2	143.87
O95445	Apolipoprotein M	121	TELFSSSC*PGGIMLNETGQGYQR	Hex(9)HexNAc(2)	4396.78	4395.79	3	1.5	11.74	693.48	286.13
O95445	Apolipoprotein M	121	TELFSSSC*PxGGIMLNETGQGYQR	Hex(9)HexNAc(2)	4412.78	4412.78	3	1.3	10.55	663.69	377.65
O95477	ATP-binding cassette sub-family A member 1	1621	GENPSHYGITAFN+HPLNLTK	Hex(4)HexNAc(6)	4077.77	4076.75	4	-3.8	6.19	414.66	148.72
O95477	ATP-binding cassette sub-family A member 1	1621	GENPSHYGITAFNHPLNLTK	Hex(9)HexNAc(2)	4074.73	4074.73	4	-0.5	9.68	583.39	233.83
O95477	ATP-binding cassette sub-family A member 1	1504	NISDYLVK	Hex(9)HexNAc(2)	2816.15	2816.15	2	-0.1	5.78	495.33	80.3
O95502	Neuronal pentraxin receptor	35	ALPGGADNASVASGAAASPGPQR	Hex(9)HexNAc(2)	3886.63	3886.63	3	-0.8	7.18	533.45	305.14
O95502	Neuronal pentraxin receptor	215	VNLSAAPAPVSAVPTGLHSK	Hex(7)HexNAc(2)	3456.59	3456.59	3	0.9	10.76	604.95	371.96
O95857	Tetraspanin-13	133	SVNPNDTC*LASC*VK	Hex(5)HexNAc(5)Fuc(1)NeuAc(1)	3827.52	3827.52	3	-2.1	5.91	449.82	193.1
O95857	Tetraspanin-13	133	SVNPNDTC*LASC*VK	Hex(5)HexNAc(5)Fuc(1)NeuAc(2)	4118.62	4118.62	3	-0.2	6.45	469.73	26.25
O95857	Tetraspanin-13	133	SVNPNDTC*LASC*VK	Hex(5)HexNAc(5)Fuc(2)NeuAc(1)	3973.58	3973.6	3	4.4	6.06	483.53	244.03
O95857	Tetraspanin-13	133	SVNPNDTC*LASC*VK	Hex(6)HexNAc(6)Fuc(1)NeuAc(2)	4483.75	4482.76	4	3.5	5.28	275.78	183.6
O95857	Tetraspanin-13	133	SVNPNDTC*LASC*VK	Hex(6)HexNAc(6)Fuc(1)NeuAc(3)	4774.85	4773.83	3	-2.7	6.26	425.93	234.04
O95857	Tetraspanin-13	133	SVNPNDTC*LASC*VK	Hex(6)HexNAc(7)Fuc(3)NeuAc(2)	4978.95	4977.94	4	0	2.07	194.21	21.46
O96005	Cleft lip and palate transmembrane protein 1	290	DYYPINESLASLPLR	Hex(6)HexNAc(2)	3129.38	3129.38	3	0.4	10.5	624.22	300.59
O96005	Cleft lip and palate transmembrane protein 1	290	DYYPINESLASLPLR	Hex(7)HexNAc(2)	3291.43	3291.43	3	-0.9	11.42	675.88	351.26
O96005	Cleft lip and palate transmembrane protein 1	290	DYYPINESLASLPLR	Hex(8)HexNAc(2)	3453.48	3453.49	3	0.9	14.53	841.67	520.62
O96005	Cleft lip and palate transmembrane protein 1	290	DYYPINESLASLPLR	Hex(9)HexNAc(2)	3615.54	3615.54	3	1.1	14.48	828.35	522.57
P00533	Epidermal growth factor receptor	347	DSLSINATNIK	Hex(6)HexNAc(2)	2554.1	2554.09	2	-4.6	4.29	272.88	126
P00533	Epidermal growth factor receptor	347	DSLSINATNIK	Hex(7)HexNAc(2)	2716.16	2716.16	3	1.9	6.48	487.86	225.48
P00533	Epidermal growth factor receptor	347	DSLSINATNIK	Hex(8)HexNAc(2)	2878.21	2878.2	2	-3.4	5.41	324.84	143.7
P00533	Epidermal growth factor receptor	361	NC*TSISGDLHILPVAFR	Hex(7)HexNAc(2)	3440.5	3440.51	3	1.7	12.56	715.62	476.69
P00533	Epidermal growth factor receptor	361	NC*TSISGDLHILPVAFR	Hex(8)HexNAc(2)	3602.56	3602.56	3	0.1	12.61	745.71	528.8
P00533	Epidermal growth factor receptor	361	NC*TSISGDLHILPVAFR	Hex(9)HexNAc(2)	3764.61	3764.61	3	0.6	13.64	764.19	560.6
P00734	Prothrombin	118	GHVNITR	Hex(10)HexNAc(2)	2823.13	2823.13	3	0.1	3.23	295.23	54.83
P00734	Prothrombin	118	GHVNITR	Hex(5)HexNAc(5)NeuAc(2)	3204.29	3204.29	3	0.1	2.01	171.43	48.33
P00734	Prothrombin	118	GHVNITR	Hex(8)HexNAc(2)	2499.02	2499.03	3	3.5	4.74	310.96	88.87
P00734	Prothrombin	118	GHVNITR	Hex(9)HexNAc(2)	2661.08	2661.08	3	0.6	6.04	392.92	160.81
P02675	Fibrinogen beta chain	377	GTAGNALMDGASQLMGENR	Hex(9)HexNAc(2)	3757.49	3757.49	3	0.5	6.6	398.64	302.33
P02679	Fibrinogen gamma chain	65	DLQSLEDILHQVENK	Hex(9)HexNAc(2)	3645.54	3645.54	3	-1	6.1	320.99	215.12
P02679	Fibrinogen gamma chain	62	VDKDLQSLEDILHQVENK	Hex(4)HexNAc(5)Fuc(1)	3932.76	3932.76	4	0	4.73	276.83	124.21
P02679	Fibrinogen gamma chain	62	VDKDLQSLEDILHQVENK	Hex(5)HexNAc(5)Fuc(1)	4094.82	4094.82	4	0.9	2.39	282.24	15.05
P02679	Fibrinogen gamma chain	62	VDKDLQSLEDILHQVENK	Hex(8)HexNAc(2)	3825.68	3825.68	4	0.2	2.11	257.62	21.86
P02679	Fibrinogen gamma chain	62	VDKDLQSLEDILHQVENK	Hex(9)HexNAc(2)	3987.73	3987.74	4	1.2	5.8	376.91	180.05
P02751	Fibronectin	516	DQC*IVDDITYNVNDTFHK	Hex(4)HexNAc(5)Fuc(1)	4006.65	4006.66	3	2.2	10.43	647.36	430.22
P02751	Fibronectin	516	DQC*IVDDITYNVNDTFHK	Hex(4)HexNAc(5)Fuc(1)NeuAc(1)	4297.75	4297.75	3	0	6.75	479.34	89.56
P02751	Fibronectin	516	DQC*IVDDITYNVNDTFHK	Hex(4)HexNAc(5)Fuc(2)	4152.71	4152.72	3	3.2	6.52	444.91	264.29
P02751	Fibronectin	516	DQC*IVDDITYNVNDTFHK	Hex(5)HexNAc(4)Fuc(1)NeuAc(1)	4256.72	4256.73	3	1.2	7.22	550.43	112.44
P02751	Fibronectin	516	DQC*IVDDITYNVNDTFHK	Hex(5)HexNAc(5)Fuc(1)	4168.71	4168.7	3	-1.4	9.47	638.5	308.64
P02751	Fibronectin	516	DQC*IVDDITYNVNDTFHK	Hex(5)HexNAc(5)Fuc(1)NeuAc(1)	4459.8	4459.8	3	0.5	12.61	705.85	106.44
P02751	Fibronectin	516	DQC*IVDDITYNVNDTFHK	Hex(5)HexNAc(5)Fuc(2)	4314.76	4314.78	4	2.7	5.32	293.41	196.86
P02751	Fibronectin	516	DQC*IVDDITYNVNDTFHK	Hex(5)HexNAc(5)Fuc(3)	4460.82	4461.81	4	-4.3	5.42	323.3	44.63
P02751	Fibronectin	516	DQC*IVDDITYNVNDTFHK	Hex(9)HexNAc(2)	4061.62	4061.64	3	4.6	5.98	395.49	248.59
P02751	Fibronectin	516	DQC*IVDDITYNVNDTFHKR	Hex(5)HexNAc(5)Fuc(1)	4324.81	4323.8	4	-0.9	2.2	238.82	78.51
P02751	Fibronectin	516	DQC*IVDDITYNVNDTFHK	Hex(5)HexNAc(6)Fuc(1)	4371.78	4371.79	3	0.9	2.08	204.54	94.82
P02751	Fibronectin	412	GGNSN+GALC*HFPFLYNNHNYTDC*TSEGR	Hex(3)HexNAc(5)Fuc(1)	4850.95	4850.96	4	2.1	6.33	365.7	13.88
P02751	Fibronectin	412	GGNSN+GALC*HFPFLYNNHNYTDC*TSEGR	Hex(4)HexNAc(5)Fuc(1)	5013	5011.98	4	-2.3	6.36	359.06	13.2
P02751	Fibronectin	412	GGNSN+GALC*HFPFLYNNHNYTDC*TSEGR	Hex(5)HexNAc(5)Fuc(1)	5175.05	5175.04	4	-2.6	6.37	384.61	13.73
P02751	Fibronectin	412	GGNSN+GALC*HFPFLYNNHNYTDC*TSEGR	Hex(5)HexNAc(5)Fuc(1)NeuAc(1)	5466.15	5466.15	4	1.4	8.37	583.05	10.87
P02751	Fibronectin	412	GGNSNGALC*HFPFLYNNHNYTDC*TSEGR	Hex(4)HexNAc(5)Fuc(1)	5012.02	5013.02	4	1.2	5.78	288.14	190.42
P02751	Fibronectin	412	GGNSNGALC*HFPFLYNNHNYTDC*TSEGR	Hex(5)HexNAc(4)Fuc(1)NeuAc(1)	5262.08	5262.09	4	1.7	6.28	415.59	83.39
P02751	Fibronectin	412	GGNSNGALC*HFPFLYNNHNYTDC*TSEGR	Hex(5)HexNAc(5)Fuc(1)	5174.07	5175.06	4	-2.1	6.04	332.53	15.95
P02751	Fibronectin	412	GGNSNGALC*HFPFLYNNHNYTDC*TSEGR	Hex(5)HexNAc(5)Fuc(1)NeuAc(1)	5465.16	5465.18	4	2.7	6.74	468.71	55.02
P02751	Fibronectin	535	HEEGHMLNC*TC*FGQGR	Hex(4)HexNAc(5)Fuc(1)	3742.46	3742.45	4	-2.8	6.11	360.66	220.01
P02751	Fibronectin	997	LDAPTNLQ+FVNETDSTVLVR	Hex(5)HexNAc(5)Fuc(1)NeuAc(1)	4495.95	4494.93	3	-4.4	4.62	321.33	14.19
P02751	Fibronectin	997	LDAPTNLQFVNETDSTVLVR	Hex(3)HexNAc(5)Fuc(1)	3879.76	3879.77	2	1.2	5.18	393.84	246.18
P02751	Fibronectin	997	LDAPTNLQFVNETDSTVLVR	Hex(4)HexNAc(5)Fuc(1)	4041.82	4041.83	3	2.1	13.57	765.28	419.72
P02751	Fibronectin	997	LDAPTNLQFVNETDSTVLVR	Hex(4)HexNAc(5)Fuc(2)	4187.87	4186.87	4	0.4	6.92	439.05	23.44
P02751	Fibronectin	997	LDAPTNLQFVNETDSTVLVR	Hex(5)HexNAc(4)Fuc(1)	4000.79	4000.79	3	-0.1	6.75	474.2	177.37
P02751	Fibronectin	997	LDAPTNLQFVNETDSTVLVR	Hex(5)HexNAc(4)Fuc(1)NeuAc(1)	4291.89	4290.87	3	-2.8	6.76	487.64	221.87
P02751	Fibronectin	997	LDAPTNLQFVNETDSTVLVR	Hex(5)HexNAc(4)Fuc(3)NeuAc(1)	4584	4583	3	1.4	2.2	169.83	103.03
P02751	Fibronectin	997	LDAPTNLQFVNETDSTVLVR	Hex(5)HexNAc(5)Fuc(1)	4203.87	4203.88	3	2.4	13.44	772.85	437.12
P02751	Fibronectin	997	LDAPTNLQFVNETDSTVLVR	Hex(5)HexNAc(5)Fuc(1)NeuAc(1)	4494.96	4494.97	3	1.6	13.59	769.64	72.76
P02751	Fibronectin	997	LDAPTNLQFVNETDSTVLVR	Hex(5)HexNAc(5)Fuc(1)NeuAc(2)	4786.06	4785.06	4	0	7.42	507.73	347.08
P02751	Fibronectin	997	LDAPTNLQFVNETDSTVLVR	Hex(5)HexNAc(5)Fuc(2)	4349.93	4350.93	4	-0.7	8.55	575.3	159.23
P02751	Fibronectin	997	LDAPTNLQFVNETDSTVLVR	Hex(5)HexNAc(5)Fuc(2)NeuAc(1)	4641.02	4640.03	3	2.2	7.23	555.07	326.95
P02751	Fibronectin	997	LDAPTNLQFVNETDSTVLVR	Hex(5)HexNAc(5)Fuc(4)	4642.04	4642.06	3	3.4	6.47	469.44	242.93
P02751	Fibronectin	997	LDAPTNLQFVNETDSTVLVR	Hex(6)HexNAc(4)Fuc(2)	4308.9	4308.92	3	4.3	5.85	352.83	238.36
P02751	Fibronectin	997	LDAPTNLQFVNETDSTVLVR	Hex(8)HexNAc(2)	3934.73	3934.74	2	3	5.61	444.11	136.57
P02751	Fibronectin	997	LDAPTNLQFVNETDSTVLVR	Hex(9)HexNAc(2)	4096.78	4096.8	3	2.6	10.44	600.94	352.83
P02771	Alpha-fetoprotein	247	FTKVNFTEIQK	Hex(4)HexNAc(5)Fuc(1)	3164.4	3164.41	3	1.8	6.3	536.79	260.6
P02771	Alpha-fetoprotein	247	FTKVNFTEIQK	Hex(4)HexNAc(5)Fuc(1)NeuAc(1)	3455.5	3455.5	3	1.5	7.64	585.82	288.82
P02771	Alpha-fetoprotein	247	FTKVNFTEIQK	Hex(5)HexNAc(4)Fuc(1)NeuAc(1)	3414.47	3414.46	3	-2.8	5.27	385.18	159.35
P02771	Alpha-fetoprotein	247	FTKVNFTEIQK	Hex(5)HexNAc(5)Fuc(1)	3326.46	3326.46	3	1.9	7.74	595.97	332.33
P02771	Alpha-fetoprotein	247	FTKVNFTEIQK	Hex(5)HexNAc(5)Fuc(1)NeuAc(1)	3617.55	3617.56	3	2.4	8.59	638.92	316.87
P02771	Alpha-fetoprotein	247	FTKVNFTEIQK	Hex(5)HexNAc(5)Fuc(1)NeuAc(2)	3908.65	3908.66	3	2.5	6.25	546.02	231.29
P02771	Alpha-fetoprotein	247	FTKVNFTEIQK	Hex(5)HexNAc(5)Fuc(2)NeuAc(1)	3763.61	3763.61	4	0.6	4.94	281.51	143.37
P02771	Alpha-fetoprotein	247	FTKVNFTEIQK	Hex(5)HexNAc(5)Fuc(3)	3618.57	3618.57	4	-1.4	2.12	212.09	112.3
P02771	Alpha-fetoprotein	250	VNFTEIQK	Hex(10)HexNAc(2)	3005.21	3005.21	2	0	5.98	392.17	157.21
P02771	Alpha-fetoprotein	250	VNFTEIQK	Hex(3)HexNAc(5)Fuc(1)	2626.14	2626.15	3	3.1	4.15	257.83	124.04
P02771	Alpha-fetoprotein	250	VNFTEIQK	Hex(4)HexNAc(5)Fuc(1)	2788.19	2788.19	3	0.4	6.05	379.59	207.99
P02771	Alpha-fetoprotein	250	VNFTEIQK	Hex(4)HexNAc(5)Fuc(1)NeuAc(1)	3079.29	3079.29	3	2.5	6.07	429.1	250.57
P02771	Alpha-fetoprotein	250	VNFTEIQK	Hex(5)HexNAc(4)Fuc(1)NeuAc(1)	3038.26	3038.26	3	0.9	2.54	252.29	80.13
P02771	Alpha-fetoprotein	250	VNFTEIQK	Hex(5)HexNAc(5)Fuc(1)	2950.24	2950.25	3	0.7	6.71	506.62	302
P02771	Alpha-fetoprotein	250	VNFTEIQK	Hex(5)HexNAc(5)Fuc(1)NeuAc(1)	3241.34	3241.34	3	0.6	6.49	495.12	255.01
P02771	Alpha-fetoprotein	250	VNFTEIQK	Hex(5)HexNAc(5)Fuc(1)NeuAc(2)	3532.44	3532.44	3	0.4	6.44	449.58	280.67
P02771	Alpha-fetoprotein	250	VNFTEIQK	Hex(5)HexNAc(5)Fuc(2)	3096.3	3096.3	3	-2	5.76	354.25	206.63
P02771	Alpha-fetoprotein	250	VNFTEIQK	Hex(5)HexNAc(5)Fuc(2)NeuAc(1)	3387.4	3387.4	3	-0.4	4.55	332.09	193.28
P02771	Alpha-fetoprotein	250	VNFTEIQK	Hex(5)HexNAc(5)Fuc(3)NeuAc(1)	3533.46	3533.44	3	-3.1	2.82	267.42	113.07
P02771	Alpha-fetoprotein	250	VNFTEIQK	Hex(6)HexNAc(5)Fuc(1)NeuAc(1)	3403.39	3403.4	3	2.3	5.74	364.55	186.6
P02771	Alpha-fetoprotein	250	VNFTEIQK	Hex(6)HexNAc(5)Fuc(2)	3258.36	3258.36	3	2.6	2.65	220.07	148.24
P02771	Alpha-fetoprotein	250	VNFTEIQK	Hex(6)HexNAc(5)Fuc(3)	3404.41	3404.41	3	-1.3	2.49	257.83	111.25
P02771	Alpha-fetoprotein	250	VNFTEIQK	Hex(8)HexNAc(2)	2681.11	2681.1	3	-1.3	7.74	582.34	291.27
P02771	Alpha-fetoprotein	250	VNFTEIQK	Hex(9)HexNAc(2)	2843.16	2843.16	3	0.1	6.86	564.96	293.73
P02786	Transferrin receptor protein 1	242	DFEDLYTPVNGSIVIVR	Hex(3)HexNAc(4)Fuc(1)	3381.54	3381.53	3	-2.8	6.45	503.34	277.57
P02786	Transferrin receptor protein 1	242	DFEDLYTPVNGSIVIVR	Hex(4)HexNAc(5)Fuc(1)	3746.67	3746.68	3	4.3	5.43	301.84	188.34
P02786	Transferrin receptor protein 1	242	DFEDLYTPVNGSIVIVR	Hex(4)HexNAc(5)Fuc(1)NeuAc(1)	4037.76	4036.76	3	1.1	8.66	582.55	354.6
P02786	Transferrin receptor protein 1	242	DFEDLYTPVNGSIVIVR	Hex(5)HexNAc(4)Fuc(1)NeuAc(2)	4287.83	4286.83	3	1.4	7.12	516.31	317.92
P02786	Transferrin receptor protein 1	242	DFEDLYTPVNGSIVIVR	Hex(5)HexNAc(4)Fuc(2)NeuAc(1)	4142.79	4142.78	3	-3.3	6.08	431.45	12.85
P02786	Transferrin receptor protein 1	242	DFEDLYTPVNGSIVIVR	Hex(5)HexNAc(5)Fuc(1)	3908.72	3908.74	3	3.9	11.12	681.24	373.68
P02786	Transferrin receptor protein 1	242	DFEDLYTPVNGSIVIVR	Hex(5)HexNAc(5)Fuc(1)NeuAc(1)	4199.82	4199.82	3	1.7	11.48	697.26	51.15
P02786	Transferrin receptor protein 1	242	DFEDLYTPVNGSIVIVR	Hex(5)HexNAc(5)Fuc(1)NeuAc(2)	4490.91	4490.92	3	1.8	12.45	722.04	10.63
P02786	Transferrin receptor protein 1	242	DFEDLYTPVNGSIVIVR	Hex(5)HexNAc(5)Fuc(2)	4054.78	4054.79	3	3.6	6.93	570.62	335.59
P02786	Transferrin receptor protein 1	242	DFEDLYTPVNGSIVIVR	Hex(5)HexNAc(5)Fuc(2)NeuAc(1)	4345.87	4345.88	3	1.4	11.48	696.39	51.32
P02786	Transferrin receptor protein 1	242	DFEDLYTPVNGSIVIVR	Hex(5)HexNAc(5)Fuc(3)NeuAc(1)	4491.93	4490.94	3	2.3	2.09	201.76	93.74
P02786	Transferrin receptor protein 1	242	DFEDLYTPVNGSIVIVR	Hex(6)HexNAc(5)Fuc(1)NeuAc(1)	4361.87	4361.88	3	3.3	5.88	380.23	52.13
P02786	Transferrin receptor protein 1	242	DFEDLYTPVNGSIVIVR	Hex(6)HexNAc(5)Fuc(1)NeuAc(2)	4652.96	4651.98	3	3.5	2.34	190.74	92
P02786	Transferrin receptor protein 1	242	DFEDLYTPVNGSIVIVR	Hex(6)HexNAc(5)Fuc(2)	4216.83	4216.84	3	2.4	7.15	551.45	329.85
P02786	Transferrin receptor protein 1	242	DFEDLYTPVNGSIVIVR	Hex(6)HexNAc(5)Fuc(2)NeuAc(1)	4507.93	4507.94	3	3.9	9.18	621.09	30.77
P02786	Transferrin receptor protein 1	242	DFEDLYTPVNGSIVIVR	Hex(6)HexNAc(5)Fuc(3)	4362.89	4361.89	3	1.7	7.54	541.45	305.98
P02786	Transferrin receptor protein 1	242	DFEDLYTPVNGSIVIVR	Hex(6)HexNAc(5)Fuc(3)NeuAc(1)	4653.98	4653.99	3	2.2	2.15	197.06	68.59
P02786	Transferrin receptor protein 1	242	DFEDLYTPVNGSIVIVR	Hex(6)HexNAc(5)Fuc(4)	4508.95	4507.95	4	2.1	7.14	489.72	323.11
P02786	Transferrin receptor protein 1	242	DFEDLYTPVNGSIVIVR	Hex(6)HexNAc(6)Fuc(1)	4273.85	4273.86	3	2	4.34	275.53	177.19
P02786	Transferrin receptor protein 1	242	DFEDLYTPVNGSIVIVR	Hex(6)HexNAc(6)Fuc(1)NeuAc(1)	4564.95	4564.96	3	3.5	6.01	389.72	37.83
P02786	Transferrin receptor protein 1	242	DFEDLYTPVNGSIVIVR	Hex(6)HexNAc(6)Fuc(1)NeuAc(2)	4856.04	4856.03	3	-2.7	2.03	177.36	110.49
P02786	Transferrin receptor protein 1	242	DFEDLYTPVNGSIVIVR	Hex(6)HexNAc(6)Fuc(1)NeuAc(3)	5147.14	5146.15	4	3.2	2.1	132.26	50.55
P02786	Transferrin receptor protein 1	242	DFEDLYTPVNGSIVIVR	Hex(6)HexNAc(6)Fuc(2)	4419.91	4419.93	3	4.1	2.57	235.2	137.96
P02786	Transferrin receptor protein 1	242	DFEDLYTPVNGSIVIVR	Hex(6)HexNAc(6)Fuc(2)NeuAc(1)	4711.01	4712.01	3	-0.1	5.04	267.3	53.84
P02786	Transferrin receptor protein 1	242	DFEDLYTPVNGSIVIVR	Hex(6)HexNAc(6)Fuc(2)NeuAc(2)	5002.1	5001.1	4	0.9	6.1	311.36	34.5
P02786	Transferrin receptor protein 1	242	DFEDLYTPVNGSIVIVR	Hex(6)HexNAc(6)Fuc(3)NeuAc(1)	4857.06	4856.07	4	2.4	5.28	244.63	154.32
P02786	Transferrin receptor protein 1	242	DFEDLYTPVNGSIVIVR	Hex(9)HexNAc(2)	3801.64	3801.65	3	3.3	11.23	660.65	398.74
P02786	Transferrin receptor protein 1	241	KDFEDLYTPVNGSIVIVR	Hex(4)HexNAc(5)Fuc(1)NeuAc(1)	4165.86	4164.84	3	-2.4	6.79	512.04	287.92
P02786	Transferrin receptor protein 1	241	KDFEDLYTPVNGSIVIVR	Hex(5)HexNAc(4)Fuc(1)NeuAc(2)	4415.93	4416.93	3	0.2	5.92	361.97	28.78
P02786	Transferrin receptor protein 1	241	KDFEDLYTPVNGSIVIVR	Hex(5)HexNAc(4)Fuc(2)NeuAc(1)	4270.89	4270.9	3	1.6	5.16	379.79	173.9
P02786	Transferrin receptor protein 1	241	KDFEDLYTPVNGSIVIVR	Hex(5)HexNAc(5)Fuc(1)	4036.82	4036.82	3	1.1	9.36	608.71	325.98
P02786	Transferrin receptor protein 1	241	KDFEDLYTPVNGSIVIVR	Hex(5)HexNAc(5)Fuc(1)NeuAc(1)	4327.91	4327.91	3	0.8	10.7	652.53	118.37
P02786	Transferrin receptor protein 1	241	KDFEDLYTPVNGSIVIVR	Hex(5)HexNAc(5)Fuc(1)NeuAc(2)	4619.01	4619.01	3	1.6	9.45	633.13	46.07
P02786	Transferrin receptor protein 1	241	KDFEDLYTPVNGSIVIVR	Hex(5)HexNAc(5)Fuc(2)	4182.87	4182.89	4	3.3	6.69	523.58	335.14
P02786	Transferrin receptor protein 1	241	KDFEDLYTPVNGSIVIVR	Hex(5)HexNAc(5)Fuc(2)NeuAc(1)	4473.97	4473.97	3	0.7	11.64	656.95	45.19
P02786	Transferrin receptor protein 1	241	KDFEDLYTPVNGSIVIVR	Hex(6)HexNAc(5)Fuc(1)NeuAc(1)	4489.96	4489.98	3	4.2	5.16	395.15	67.37
P02786	Transferrin receptor protein 1	241	KDFEDLYTPVNGSIVIVR	Hex(6)HexNAc(5)Fuc(1)NeuAc(2)	4781.06	4781.06	3	-0.8	2.4	214.36	19.41
P02786	Transferrin receptor protein 1	241	KDFEDLYTPVNGSIVIVR	Hex(6)HexNAc(5)Fuc(2)NeuAc(1)	4636.02	4635.03	4	3.5	2	166.5	92.52
P02786	Transferrin receptor protein 1	241	KDFEDLYTPVNGSIVIVR	Hex(6)HexNAc(5)NeuAc(2)	4635	4635.99	4	-3.5	4.68	356.87	199.18
P02786	Transferrin receptor protein 1	241	KDFEDLYTPVNGSIVIVR	Hex(6)HexNAc(6)Fuc(1)	4401.95	4400.94	3	-0.9	2.16	235.52	24.89
P02786	Transferrin receptor protein 1	241	KDFEDLYTPVNGSIVIVR	Hex(6)HexNAc(6)Fuc(1)NeuAc(1)	4693.04	4694.06	3	3.8	6.07	390.43	84.18
P02786	Transferrin receptor protein 1	241	KDFEDLYTPVNGSIVIVR	Hex(6)HexNAc(6)Fuc(1)NeuAc(2)	4984.14	4983.14	4	1.4	6.38	398.78	166.45
P02786	Transferrin receptor protein 1	241	KDFEDLYTPVNGSIVIVR	Hex(6)HexNAc(6)Fuc(1)NeuAc(3)	5275.23	5274.22	4	-1.1	5.69	327.97	123.61
P02786	Transferrin receptor protein 1	241	KDFEDLYTPVNGSIVIVR	Hex(6)HexNAc(6)Fuc(2)NeuAc(1)	4839.1	4839.08	3	-3.8	4.11	260.19	43.3
P02786	Transferrin receptor protein 1	720	KQN+NGAFNETLFR	Hex(7)HexNAc(2)	3080.28	3080.29	3	0.8	7.01	532.88	48.15
P02786	Transferrin receptor protein 1	720	KQN+NGAFNETLFR	Hex(8)HexNAc(2)	3242.34	3242.33	3	-2.2	6.49	554.3	28.09
P02786	Transferrin receptor protein 1	720	KQN+NGAFNETLFR	Hex(9)HexNAc(2)	3404.39	3404.39	3	1.5	6.9	505.26	46.39
P02786	Transferrin receptor protein 1	720	KQNNGAFNETLFR	Hex(7)HexNAc(2)	3079.3	3079.3	3	-0.3	8.16	581.81	333.96
P02786	Transferrin receptor protein 1	720	KQNNGAFNETLFR	Hex(8)HexNAc(2)	3241.35	3241.35	3	0.5	7.41	575.7	367.04
P02786	Transferrin receptor protein 1	720	KQNNGAFNETLFR	Hex(9)HexNAc(2)	3403.41	3403.41	3	1.3	6.84	520.26	309.23
P02786	Transferrin receptor protein 1	721	QNN+GAFNETLFR	Hex(7)HexNAc(2)	2952.19	2952.19	3	2	6.44	479.66	49.12
P02786	Transferrin receptor protein 1	721	QNN+GAFNETLFR	Hex(8)HexNAc(2)	3114.24	3114.24	3	0.4	6.99	560.99	68.7
P02786	Transferrin receptor protein 1	721	QNN+GAFNETLFR	Hex(9)HexNAc(2)	3276.29	3276.3	3	1.3	6.24	457.72	59.5
P02786	Transferrin receptor protein 1	721	QNNGAFNETLFR	Hex(4)HexNAc(6)Fuc(4)NeuAc(1)	4152.69	4151.71	4	4.7	6.66	550.28	290.81
P02786	Transferrin receptor protein 1	721	QNNGAFNETLFR	Hex(7)HexNAc(2)	2951.2	2951.2	3	-2.9	6.41	559.8	293.71
P02786	Transferrin receptor protein 1	721	QNNGAFNETLFR	Hex(8)HexNAc(2)	3113.26	3113.25	3	-0.9	9.11	613	348.95
P02786	Transferrin receptor protein 1	721	QNNGAFNETLFR	Hex(9)HexNAc(2)	3275.31	3275.31	3	-0.7	7.99	587.85	316.29
P04004	Vitronectin	169	NGSLFAFR	Hex(10)HexNAc(2)	2938.16	2938.16	2	0.6	6.22	400.98	274.75
P04004	Vitronectin	169	NGSLFAFR	Hex(5)HexNAc(4)NeuAc(1)	2825.15	2825.15	3	0.7	2.14	222.98	24.33
P04004	Vitronectin	169	NGSLFAFR	Hex(6)HexNAc(3)NeuAc(1)	2784.12	2784.12	3	-0.1	5.16	347.77	94.74
P04004	Vitronectin	169	NGSLFAFR	Hex(6)HexNAc(4)NeuAc(1)	2987.2	2987.2	3	0.2	3.96	298.71	74.84
P04004	Vitronectin	169	NGSLFAFR	Hex(8)HexNAc(2)	2614.05	2614.06	2	1.7	6.12	389.45	219.27
P04004	Vitronectin	169	NGSLFAFR	Hex(9)HexNAc(2)	2776.11	2776.1	3	-1.8	5.71	413.41	190.31
P04004	Vitronectin	242	NISDGFDGIPDN+VDAALALPAHSYSGR	Hex(7)HexNAc(2)	4313.83	4312.82	3	-2	7.24	501.17	335.94
P04004	Vitronectin	242	NISDGFDGIPDNVDAALALPAHSYSGR	Hex(10)HexNAc(2)	4799.01	4799.02	3	1.5	11.72	685.14	358.83
P04004	Vitronectin	242	NISDGFDGIPDNVDAALALPAHSYSGR	Hex(4)HexNAc(5)Fuc(1)NeuAc(1)	4873.08	4873.09	4	0.3	6.34	346.98	37.23
P04004	Vitronectin	242	NISDGFDGIPDNVDAALALPAHSYSGR	Hex(4)HexNAc(5)Fuc(2)NeuAc(1)	5019.14	5018.14	4	-0.6	5.16	237.38	198.37
P04004	Vitronectin	242	NISDGFDGIPDNVDAALALPAHSYSGR	Hex(5)HexNAc(5)Fuc(1)	4744.04	4744.06	4	4.1	3.95	315.72	101.59
P04004	Vitronectin	242	NISDGFDGIPDNVDAALALPAHSYSGR	Hex(5)HexNAc(5)Fuc(1)NeuAc(1)	5035.14	5035.15	4	2.6	7.01	537.21	42.87
P04004	Vitronectin	242	NISDGFDGIPDNVDAALALPAHSYSGR	Hex(5)HexNAc(5)Fuc(1)NeuAc(2)	5326.23	5326.22	3	-2.9	6.18	360.02	158.35
P04004	Vitronectin	242	NISDGFDGIPDNVDAALALPAHSYSGR	Hex(5)HexNAc(5)Fuc(2)NeuAc(1)	5181.19	5180.21	4	3.6	5.48	343.08	214.86
P04004	Vitronectin	242	NISDGFDGIPDNVDAALALPAHSYSGR	Hex(5)HexNAc(5)Fuc(3)NeuAc(1)	5327.25	5328.23	4	-4.6	5	274.11	31.73
P04004	Vitronectin	242	NISDGFDGIPDNVDAALALPAHSYSGR	Hex(6)HexNAc(2)	4150.8	4150.81	3	3.5	11.48	662.22	338.51
P04004	Vitronectin	242	NISDGFDGIPDNVDAALALPAHSYSGR	Hex(6)HexNAc(5)Fuc(1)NeuAc(1)	5197.19	5198.2	4	1.8	4.95	247.94	17.06
P04004	Vitronectin	242	NISDGFDGIPDNVDAALALPAHSYSGR	Hex(6)HexNAc(5)Fuc(2)NeuAc(1)	5343.25	5342.26	4	2.5	2.26	154.51	61.91
P04004	Vitronectin	242	NISDGFDGIPDNVDAALALPAHSYSGR	Hex(6)HexNAc(6)Fuc(1)NeuAc(1)	5400.27	5400.28	4	2.6	3.72	247.78	29.27
P04004	Vitronectin	242	NISDGFDGIPDNVDAALALPAHSYSGR	Hex(6)HexNAc(6)Fuc(1)NeuAc(2)	5691.36	5690.38	4	3.7	2.4	197.19	94.92
P04004	Vitronectin	242	NISDGFDGIPDNVDAALALPAHSYSGR	Hex(6)HexNAc(6)Fuc(2)NeuAc(1)	5546.33	5547.36	4	4.5	4.81	292.29	32.4
P04004	Vitronectin	242	NISDGFDGIPDNVDAALALPAHSYSGR	Hex(6)HexNAc(6)Fuc(3)NeuAc(1)	5692.38	5692.4	4	2.5	5.34	268.41	25.16
P04004	Vitronectin	242	NISDGFDGIPDNVDAALALPAHSYSGR	Hex(6)HexNAc(6)NeuAc(2)	5545.31	5544.33	4	4.1	5.06	305.17	169.29
P04004	Vitronectin	242	NISDGFDGIPDNVDAALALPAHSYSGR	Hex(7)HexNAc(2)	4312.85	4312.87	4	4.7	15.22	852.14	506.01
P04004	Vitronectin	242	NISDGFDGIPDNVDAALALPAHSYSGR	Hex(8)HexNAc(2)	4474.9	4474.91	4	0.4	15.63	878.4	302.02
P04004	Vitronectin	242	NISDGFDGIPDNVDAALALPAHSYSGR	Hex(9)HexNAc(2)	4636.96	4636.96	3	1.3	17.72	992.13	453.6
P04004	Vitronectin	242	NISDGFDGIPxDNVDAALALPAHSYSGR	Hex(3)HexNAc(6)	4492.95	4491.95	4	-0.7	4.62	230.59	202.96
P04004	Vitronectin	242	NISDGFDGIPxDNVDAALALPAHSYSGR	Hex(4)HexNAc(6)	4655	4654.99	4	-3.3	2	185.79	99.71
P04004	Vitronectin	242	NISDGFDGIPDNVDAALALPAHSYSGR	Hex(6)HexNAc(6)Fuc(4)NeuAc(1)	5838.44	5837.46	4	3.5	4.27	221.13	114.48
P04004	Vitronectin	85	NNATVHEQVGGPSLTSDLQAQSK	Hex(8)HexNAc(2)	4083.75	4082.75	4	-0.5	6.91	488.22	265.47
P04004	Vitronectin	85	NNATVHEQVGGPSLTSDLQAQSK	Hex(9)HexNAc(2)	4245.8	4245.82	3	3.2	6.23	391.74	224.53
P04114	Apolipoprotein B-100	3462	YDFNSSMLYSTAK	Hex(9)HexNAc(2)	3391.32	3391.33	3	5	3.86	328.86	201.57
P04233	HLA class II histocompatibility antigen gamma chain	267	GHHNC*SESLELEDPSSGLGVTK	Hex(6)HexNAc(2)	3731.55	3731.54	4	-1.9	10.56	629.15	509.37
P04626	Receptor tyrosine-protein kinase erbB-2	518	GHC*WGPGPTQ+C*VNC*SQFLR	Hex(5)HexNAc(5)NeuAc(2)	4669.82	4668.8	4	-1.7	2.11	210.18	20.17
P04626	Receptor tyrosine-protein kinase erbB-2	518	GHC*WGPGPTQC*VNC*SQFLR	Hex(5)HexNAc(5)	4086.64	4086.66	3	3.8	5.99	391	186.93
P04626	Receptor tyrosine-protein kinase erbB-2	518	GHC*WGPGPTQC*VNC*SQFLR	Hex(5)HexNAc(5)Fuc(1)NeuAc(1)	4523.79	4522.8	3	2.4	5.36	288.94	113.53
P04626	Receptor tyrosine-protein kinase erbB-2	518	GHC*WGPGPTQC*VNC*SQFLR	Hex(5)HexNAc(5)Fuc(1)NeuAc(2)	4814.89	4814.88	4	-1.7	3.94	270.48	45.57
P04626	Receptor tyrosine-protein kinase erbB-2	518	GHC*WGPGPTQC*VNC*SQFLR	Hex(5)HexNAc(5)NeuAc(1)	4377.74	4377.74	3	0	6.8	513	132.25
P04626	Receptor tyrosine-protein kinase erbB-2	518	GHC*WGPGPTQC*VNC*SQFLR	Hex(5)HexNAc(5)NeuAc(2)	4668.83	4669.85	3	3.6	6.73	507.81	48.05
P04626	Receptor tyrosine-protein kinase erbB-2	518	GHC*WGPGPTQC*VNC*SQFLR	Hex(9)HexNAc(2)	4125.61	4124.63	3	3.8	6.55	428.95	211.74
P04626	Receptor tyrosine-protein kinase erbB-2	176	NNQLALTLIDTNR	Hex(5)HexNAc(5)Fuc(1)NeuAc(1)	3748.62	3748.62	3	1.9	4.85	385.7	186.42
P04626	Receptor tyrosine-protein kinase erbB-2	176	NNQLALTLIDTNR	Hex(5)HexNAc(5)Fuc(1)NeuAc(2)	4039.71	4038.71	4	-0.7	7.16	570.11	260.79
P04626	Receptor tyrosine-protein kinase erbB-2	176	NNQLALTLIDTNR	Hex(9)HexNAc(2)	3350.44	3350.44	3	1.4	6.31	499.78	199.26
P05362	Intercellular adhesion molecule 1	259	LNPTVTYGNDSFSAK	Hex(5)HexNAc(5)Fuc(1)NeuAc(1)	3876.59	3876.59	3	-0.6	6.37	443.1	182.32
P05556	Integrin beta-1	477	C*HEGNGTFEC*GAC*R	Hex(10)HexNAc(2)	3681.3	3681.31	3	1.8	7.57	395.54	395.54
P05556	Integrin beta-1	477	C*HEGNGTFEC*GAC*R	Hex(6)HexNAc(2)	3033.09	3033.09	3	0.3	10.42	612.23	506.78
P05556	Integrin beta-1	477	C*HEGNGTFEC*GAC*R	Hex(7)HexNAc(2)	3195.14	3195.15	3	2.7	8.11	575.11	489.44
P05556	Integrin beta-1	477	C*HEGNGTFEC*GAC*R	Hex(8)HexNAc(2)	3357.2	3357.2	3	0.3	9.42	581.08	511.37
P05556	Integrin beta-1	477	C*HEGNGTFEC*GAC*R	Hex(9)HexNAc(2)	3519.25	3519.26	3	2.3	10.24	637.04	588.84
P05556	Integrin beta-1	659	DTC*TQ+EC*SYFNITK	Hex(7)HexNAc(2)	3308.25	3308.25	2	1.4	2.55	225.63	55.95
P05556	Integrin beta-1	659	DTC*TQEC*SYFNITK	Hex(6)HexNAc(2)	3145.21	3145.21	3	-0.8	14.24	846.17	529.33
P05556	Integrin beta-1	659	DTC*TQEC*SYFNITK	Hex(7)HexNAc(2)	3307.26	3307.26	3	-1.7	8.08	570.48	447.29
P05556	Integrin beta-1	659	DTC*TQEC*SYFNITK	Hex(7)HexNAc(6)Fuc(2)	4411.7	4412.69	4	-2.7	10.08	619.91	286.65
P05556	Integrin beta-1	659	DTC*TQEC*SYFNITK	Hex(8)HexNAc(2)	3469.32	3469.32	3	1.7	12.27	710.04	438.69
P05556	Integrin beta-1	659	DTC*TQEC*SYFNITK	Hex(9)HexNAc(2)	3631.37	3631.37	3	-0.2	10.28	621.63	507.03
P05556	Integrin beta-1	519	ENSSEIC*SNN+GEC*VC*GQC*VC*R	Hex(8)HexNAc(2)	4222.51	4221.52	3	2.7	8.46	550.6	15.71
P05556	Integrin beta-1	519	ENSSEIC*SNNGEC*VC*GQC*VC*R	Hex(8)HexNAc(2)	4221.53	4222.53	3	-0.8	8.3	558.51	229.91
P05556	Integrin beta-1	519	ENSSEIC*SNNGEC*VC*GQC*VC*R	Hex(9)HexNAc(2)	4383.58	4383.57	3	-2.8	6.08	400.6	131.99
P05556	Integrin beta-1	658	KDTC*TQEC*SYFNITK	Hex(6)HexNAc(2)	3273.31	3273.31	3	1.5	10.58	624.66	440.84
P05556	Integrin beta-1	658	KDTC*TQEC*SYFNITK	Hex(7)HexNAc(2)	3435.36	3435.37	3	2.5	6.26	377.28	220.45
P05556	Integrin beta-1	658	KDTC*TQEC*SYFNITK	Hex(8)HexNAc(2)	3597.41	3597.41	3	0.3	6.99	515.7	310.56
P05556	Integrin beta-1	658	KDTC*TQEC*SYFNITK	Hex(9)HexNAc(2)	3759.47	3759.46	3	-1.3	6.59	473.14	290.88
P05556	Integrin beta-1	518	KENSSEIC*SNN+GEC*VC*GQC*VC*R	Hex(6)HexNAc(2)	4026.5	4026.49	3	-3.7	6.91	516.57	11.21
P05556	Integrin beta-1	518	KENSSEIC*SNN+GEC*VC*GQC*VC*R	Hex(7)HexNAc(2)	4188.55	4188.55	3	-0.7	6.61	430.16	23.32
P05556	Integrin beta-1	518	KENSSEIC*SNN+GEC*VC*GQC*VC*R	Hex(8)HexNAc(2)	4350.61	4350.6	3	-1	7.08	481.89	12.69
P05556	Integrin beta-1	518	KENSSEIC*SNN+GEC*VC*GQC*VC*R	Hex(9)HexNAc(2)	4512.66	4513.66	3	-0.2	5.07	263.81	26.97
P05556	Integrin beta-1	518	KENSSEIC*SNNGEC*VC*GQC*VC*R	Hex(5)HexNAc(2)	3863.47	3863.46	3	-2.2	4.48	259.59	118.31
P05556	Integrin beta-1	518	KENSSEIC*SNNGEC*VC*GQC*VC*R	Hex(6)HexNAc(2)	4025.52	4025.54	3	4.4	10.3	623.75	464.27
P05556	Integrin beta-1	518	KENSSEIC*SNNGEC*VC*GQC*VC*R	Hex(7)HexNAc(2)	4187.57	4187.57	3	-1	6.92	474.95	126.89
P05556	Integrin beta-1	518	KENSSEIC*SNNGEC*VC*GQC*VC*R	Hex(8)HexNAc(2)	4349.62	4348.62	3	1	12.01	697.39	540.15
P05556	Integrin beta-1	518	KENSSEIC*SNNGEC*VC*GQC*VC*R	Hex(9)HexNAc(2)	4511.68	4511.66	3	-2.9	6.83	483.45	109.54
P05556	Integrin beta-1	203	LRNPC*TSEQNC*TSPFSYK	Hex(10)HexNAc(2)	4215.66	4215.66	3	0.1	9.16	589.05	207.77
P05556	Integrin beta-1	203	LRNPC*TSEQNC*TSPFSYK	Hex(5)HexNAc(2)	3405.4	3405.4	3	-0.4	5.95	418.48	214.21
P05556	Integrin beta-1	203	LRNPC*TSEQNC*TSPFSYK	Hex(5)HexNAc(5)Fuc(1)	4160.69	4160.7	3	1	6.12	444.34	151.07
P05556	Integrin beta-1	203	LRNPC*TSEQNC*TSPFSYK	Hex(5)HexNAc(5)Fuc(1)NeuAc(1)	4451.79	4450.77	3	-2.9	6.11	463.55	173.66
P05556	Integrin beta-1	203	LRNPC*TSEQNC*TSPFSYK	Hex(5)HexNAc(5)Fuc(2)	4306.75	4305.76	3	2.9	5.66	331.53	163.35
P05556	Integrin beta-1	203	LRNPC*TSEQNC*TSPFSYK	Hex(6)HexNAc(4)	3973.61	3973.61	3	1.1	5.68	340.93	158.39
P05556	Integrin beta-1	203	LRNPC*TSEQNC*TSPFSYK	Hex(6)HexNAc(6)Fuc(1)	4525.83	4525.84	3	2.3	5.54	412.33	157.67
P05556	Integrin beta-1	203	LRNPC*TSEQNC*TSPFSYK	Hex(6)HexNAc(6)Fuc(2)	4671.88	4671.88	3	-0.4	6.13	464.01	13.92
P05556	Integrin beta-1	203	LRNPC*TSEQNC*TSPFSYK	Hex(7)HexNAc(2)	3729.5	3729.51	3	0.5	11.23	668.62	379.31
P05556	Integrin beta-1	203	LRNPC*TSEQNC*TSPFSYK	Hex(8)HexNAc(2)	3891.56	3891.56	4	0.6	9.15	622.47	369.94
P05556	Integrin beta-1	203	LRNPC*TSEQNC*TSPFSYK	Hex(9)HexNAc(2)	4053.61	4053.61	3	0.4	10.2	629.78	209.26
P05556	Integrin beta-1	203	LRNPxC*TSEQNC*TSPFSYK	Hex(4)HexNAc(5)NeuAc(1)	4159.67	4158.68	3	3.2	2.19	255.51	31.32
P05556	Integrin beta-1	403	N+GVNGTGENGR	Hex(8)HexNAc(2)	2778.06	2778.06	2	0.3	4.59	309.57	66.82
P05556	Integrin beta-1	403	N+GVNGTGENGR	Hex(9)HexNAc(2)	2940.11	2940.11	2	-0.1	5.96	394.13	156.85
P05556	Integrin beta-1	403	NGVNGTGEN+GR	Hex(8)HexNAc(2)	2778.06	2778.05	2	-3.2	2.19	205.88	97.38
P05556	Integrin beta-1	403	NGVNGTGEN+GR	Hex(9)HexNAc(2)	2940.11	2940.1	2	-4.3	4.94	391.1	49.48
P05556	Integrin beta-1	403	NGVNGTGEN+GRK	Hex(10)HexNAc(2)	3230.26	3230.27	3	3	2.27	258.72	24.9
P05556	Integrin beta-1	403	NGVNGTGEN+GRK	Hex(6)HexNAc(6)Fuc(1)NeuAc(1)	3831.52	3831.51	3	-2.1	2.14	267.76	17.87
P05556	Integrin beta-1	403	NGVNGTGEN+GRK	Hex(8)HexNAc(2)	2906.15	2906.15	3	-0.9	5.06	368.06	102.09
P05556	Integrin beta-1	403	NGVNGTGEN+GRK	Hex(9)HexNAc(2)	3068.21	3068.21	3	0.1	5.54	413.28	140.6
P05556	Integrin beta-1	403	NGVNGTGENGR	Hex(9)HexNAc(2)	2939.13	2939.12	2	-1.1	4.78	288.09	108.95
P05556	Integrin beta-1	403	NGVNGTGENGRK	Hex(8)HexNAc(2)	2905.17	2905.17	3	0.1	4.72	314.47	118.18
P05556	Integrin beta-1	403	NGVNGTGENGRK	Hex(9)HexNAc(2)	3067.22	3067.22	3	-1	5.72	413.76	234.67
P05556	Integrin beta-1	205	NPC*TSEQNC*TSPFSYK	Hex(5)HexNAc(5)Fuc(1)	3891.51	3891.52	3	3.4	6.08	381.82	223.89
P05556	Integrin beta-1	205	NPC*TSEQNC*TSPFSYK	Hex(7)HexNAc(2)	3460.32	3460.3	3	-4.5	6.37	474.29	334.6
P05556	Integrin beta-1	205	NPC*TSEQNC*TSPFSYK	Hex(9)HexNAc(2)	3784.42	3784.42	3	-0.1	8.23	547.14	360.78
P05556	Integrin beta-1	34	SC*GEC*IQAGPNC*GWC*TNSTFLQEGMPxTSAR	Hex(7)HexNAc(2)	4932.91	4931.91	4	0.2	7.88	469.83	186.44
P05556	Integrin beta-1	34	SC*GEC*IQAGPNC*GWC*TNSTFLQEGMPxTSAR	Hex(8)HexNAc(2)	5094.97	5094.99	4	4.4	9.62	599.79	219.75
P05556	Integrin beta-1	34	SC*GEC*IQAGPNC*GWC*TNSTFLQEGMPxTSAR	Hex(9)HexNAc(2)	5257.02	5257.02	4	0.9	7.9	544.01	183.65
P05556	Integrin beta-1	399	SYC*KN+GVNGTGENGR	Hex(9)HexNAc(2)	3478.33	3478.33	3	0.1	5.98	410.1	236.32
P05981	Serine protease hepsin	108	TAGANGTSGFFC*VDEGRLPHTQR	Hex(5)HexNAc(3)Fuc(1)NeuAc(1)	4334.81	4334.81	4	-1.6	2.18	339.31	132.77
P05997	Collagen alpha-2(V) chain	1396	EASQNITYIC*K	Hex(6)HexNAc(2)	2705.11	2705.12	2	1.4	2.37	297.01	136.88
P05997	Collagen alpha-2(V) chain	1396	EASQNITYIC*K	Hex(9)HexNAc(2)	3191.27	3191.28	2	2.7	3.35	294.73	121.3
P06213	Insulin receptor	280	C*VNFSFC*QDLHHK	Hex(5)HexNAc(5)Fuc(1)	3663.46	3663.46	4	-1.3	4.93	320.07	233.51
P06213	Insulin receptor	280	C*VNFSFC*QDLHHK	Hex(5)HexNAc(5)Fuc(1)NeuAc(1)	3954.56	3954.55	4	-0.4	6.17	393.33	242.16
P06213	Insulin receptor	130	ELGLYNLMNITR	Hex(9)HexNAc(2)	3301.39	3301.39	3	0.9	5.94	415.16	190.44
P06213	Insulin receptor	417	GETLEIGNYSFYALDNQNLR	Hex(5)HexNAc(5)Fuc(1)NeuAc(1)	4579.92	4580.94	3	3.2	5.59	315.77	16.42
P06213	Insulin receptor	915	GLSPGNYSVR	Hex(4)HexNAc(3)Fuc(1)NeuAc(1)	2744.14	2744.14	3	-0.3	5.25	354.7	103.51
P06213	Insulin receptor	915	GLSPGNYSVR	Hex(7)HexNAc(2)	2590.07	2590.07	2	1.7	6.19	387.84	188.65
P06213	Insulin receptor	915	GLSPGNYSVR	Hex(8)HexNAc(2)	2752.12	2752.13	2	4.1	2.85	255.75	106.45
P06213	Insulin receptor	915	GLSPGNYSVR	Hex(9)HexNAc(2)	2914.17	2914.17	2	0.7	2.47	233.42	72.37
P06213	Insulin receptor	444	HNLTITQGK	Hex(5)HexNAc(5)Fuc(1)	2983.28	2983.29	3	4.3	6.14	477.88	249.97
P06213	Insulin receptor	444	HNLTITQGK	Hex(5)HexNAc(5)Fuc(1)NeuAc(1)	3274.37	3274.38	3	1.3	8.02	590.43	298.01
P06213	Insulin receptor	444	HNLTITQGK	Hex(6)HexNAc(6)Fuc(1)	3348.41	3348.42	3	1.8	6.79	525.31	300.63
P06213	Insulin receptor	444	HNLTITQGK	Hex(6)HexNAc(6)Fuc(1)NeuAc(1)	3639.5	3639.5	3	-0.5	6.38	430.47	223.54
P06213	Insulin receptor	444	HNLTITQGK	Hex(6)HexNAc(6)Fuc(3)	3640.53	3640.51	4	-2.9	2	169.3	76.15
P06213	Insulin receptor	444	HNLTITQGK	Hex(9)HexNAc(2)	2876.19	2876.19	3	-0.2	9.23	610.41	342.65
P06213	Insulin receptor	42	NNLTR	Hex(5)HexNAc(4)Fuc(1)	2385.98	2385.98	2	3.2	2.28	267.39	42.32
P06213	Insulin receptor	42	NNLTR	Hex(9)HexNAc(2)	2481.97	2481.96	2	-2.7	2	260.67	16.84
P06213	Insulin receptor	225	SHGC*TAEGLC*C*HSEC*LGNC*SQ+PDDPTK	Hex(4)HexNAc(6)	4944.86	4943.84	4	-4.4	6.37	412.45	310.57
P06213	Insulin receptor	225	SHGC*TAEGLC*C*HSEC*LGNC*SQ+PDDPTK	Hex(6)HexNAc(2)	4456.65	4455.64	3	-1.6	5.63	320.32	165.25
P06213	Insulin receptor	225	SHGC*TAEGLC*C*HSEC*LGNC*SQ+PDDPTK	Hex(9)HexNAc(2)	4942.81	4941.79	4	-3.1	6.58	415.68	336.67
P06213	Insulin receptor	225	SHGC*TAEGLC*C*HSEC*LGNC*SQPDDPTK	Hex(6)HexNAc(2)	4455.67	4455.66	4	-1	11.66	674.87	133.93
P06213	Insulin receptor	225	SHGC*TAEGLC*C*HSEC*LGNC*SQPDDPTK	Hex(6)HexNAc(3)Fuc(1)	4804.8	4804.81	4	0.4	2.59	209.89	123.05
P06213	Insulin receptor	225	SHGC*TAEGLC*C*HSEC*LGNC*SQPDDPTK	Hex(7)HexNAc(2)	4617.72	4617.73	4	3	10.51	621.31	479.58
P06213	Insulin receptor	225	SHGC*TAEGLC*C*HSEC*LGNC*SQPDDPTK	Hex(8)HexNAc(2)	4779.77	4779.77	4	-1.1	11.54	653.7	124.7
P06731	Carcinoembryonic antigen-related cell adhesion molecule 5	568	AYVC*GIQNSVSANR	Hex(5)HexNAc(5)Fuc(1)NeuAc(1)	3801.55	3801.54	4	-2.2	5.81	435.02	143.45
P06731	Carcinoembryonic antigen-related cell adhesion molecule 5	645	ITPNNNGTYAC*FVSNLATGR	Hex(5)HexNAc(2)	3386.46	3386.45	3	-0.9	11.53	697.88	370.05
P06731	Carcinoembryonic antigen-related cell adhesion molecule 5	645	ITPNNNGTYAC*FVSNLATGR	Hex(5)HexNAc(4)Fuc(1)	3938.67	3938.68	4	1	6.76	430.97	293.9
P06731	Carcinoembryonic antigen-related cell adhesion molecule 5	645	ITPNNNGTYAC*FVSNLATGR	Hex(5)HexNAc(4)Fuc(1)NeuAc(2)	4520.86	4521.85	3	-3.4	6.17	432.11	125.05
P06731	Carcinoembryonic antigen-related cell adhesion molecule 5	645	ITPNNNGTYAC*FVSNLATGR	Hex(5)HexNAc(4)NeuAc(2)	4374.81	4373.82	3	4.7	4.82	303.86	160.16
P06731	Carcinoembryonic antigen-related cell adhesion molecule 5	645	ITPNNNGTYAC*FVSNLATGR	Hex(5)HexNAc(5)Fuc(1)	4141.75	4141.77	3	5	4.63	377.98	125.26
P06731	Carcinoembryonic antigen-related cell adhesion molecule 5	645	ITPNNNGTYAC*FVSNLATGR	Hex(5)HexNAc(5)Fuc(3)	4433.87	4432.89	3	4.9	2.19	267.61	26.23
P06731	Carcinoembryonic antigen-related cell adhesion molecule 5	645	ITPNNNGTYAC*FVSNLATGR	Hex(6)HexNAc(2)	3548.51	3548.52	3	2	8.33	556.62	292.17
P06731	Carcinoembryonic antigen-related cell adhesion molecule 5	645	ITPNNNGTYAC*FVSNLATGR	Hex(6)HexNAc(3)Fuc(1)NeuAc(1)	4188.74	4188.75	3	0.7	9.71	629.68	154.58
P06731	Carcinoembryonic antigen-related cell adhesion molecule 5	645	ITPNNNGTYAC*FVSNLATGR	Hex(6)HexNAc(3)Fuc(2)	4043.71	4042.71	3	2	8.75	572.05	389.45
P06731	Carcinoembryonic antigen-related cell adhesion molecule 5	645	ITPNNNGTYAC*FVSNLATGR	Hex(6)HexNAc(3)NeuAc(1)	4042.68	4042.7	3	4.9	10.16	603.9	23.19
P06731	Carcinoembryonic antigen-related cell adhesion molecule 5	645	ITPNNNGTYAC*FVSNLATGR	Hex(6)HexNAc(4)NeuAc(1)	4245.76	4245.78	3	3.2	2.39	221.98	39.22
P06731	Carcinoembryonic antigen-related cell adhesion molecule 5	645	ITPNNNGTYAC*FVSNLATGR	Hex(6)HexNAc(5)Fuc(1)NeuAc(1)	4594.9	4594.9	3	-0.5	4.95	419.01	45.11
P06731	Carcinoembryonic antigen-related cell adhesion molecule 5	645	ITPNNNGTYAC*FVSNLATGR	Hex(6)HexNAc(6)Fuc(1)	4506.89	4506.9	3	2.9	7.36	572.89	360.24
P06731	Carcinoembryonic antigen-related cell adhesion molecule 5	645	ITPNNNGTYAC*FVSNLATGR	Hex(6)HexNAc(6)Fuc(1)NeuAc(1)	4797.98	4797	3	4.9	6.06	397.27	188.99
P06731	Carcinoembryonic antigen-related cell adhesion molecule 5	645	ITPNNNGTYAC*FVSNLATGR	Hex(6)HexNAc(6)Fuc(2)	4652.94	4653.94	4	-0.5	6.92	446.44	109.49
P06731	Carcinoembryonic antigen-related cell adhesion molecule 5	645	ITPNNNGTYAC*FVSNLATGR	Hex(6)HexNAc(6)NeuAc(1)	4651.92	4650.94	3	4.4	6.57	466.15	240.11
P06731	Carcinoembryonic antigen-related cell adhesion molecule 5	645	ITPNNNGTYAC*FVSNLATGR	Hex(4)HexNAc(3)NeuAc(1)	3718.58	3718.58	3	0.6	7.1	539.15	330.27
P06731	Carcinoembryonic antigen-related cell adhesion molecule 5	208	NDTASYK	Hex(5)HexNAc(5)Fuc(1)	2770.08	2770.09	3	4.3	2.15	211.41	90.05
P06731	Carcinoembryonic antigen-related cell adhesion molecule 5	665	NNSIVK	Hex(4)HexNAc(5)Fuc(1)	2484.05	2484.05	2	2.3	2.2	308.87	55.57
P06731	Carcinoembryonic antigen-related cell adhesion molecule 5	665	NNSIVK	Hex(5)HexNAc(5)Fuc(1)	2646.1	2646.1	3	0.6	3.06	383.55	61.99
P06731	Carcinoembryonic antigen-related cell adhesion molecule 5	665	NNSIVK	Hex(5)HexNAc(5)Fuc(1)NeuAc(1)	2937.2	2937.2	3	0.8	2.86	381.82	54.21
P06731	Carcinoembryonic antigen-related cell adhesion molecule 5	665	NNSIVK	Hex(5)HexNAc(5)Fuc(1)NeuAc(2)	3228.29	3228.3	3	1	2.15	259.75	34.64
P06731	Carcinoembryonic antigen-related cell adhesion molecule 5	665	NNSIVK	Hex(5)HexNAc(5)Fuc(2)	2792.16	2792.16	3	1.7	2.38	291.75	57.98
P06731	Carcinoembryonic antigen-related cell adhesion molecule 5	665	NNSIVK	Hex(5)HexNAc(5)Fuc(2)NeuAc(1)	3083.26	3083.26	3	0.8	2.49	305.27	53.78
P06731	Carcinoembryonic antigen-related cell adhesion molecule 5	665	NNSIVK	Hex(5)HexNAc(5)NeuAc(1)	2791.14	2791.14	3	0.1	2.47	318.28	56.65
P06731	Carcinoembryonic antigen-related cell adhesion molecule 5	471	NSGLYTC*QANNSASGHSR	Hex(5)HexNAc(5)Fuc(1)NeuAc(1)	4186.65	4187.67	3	4.5	5.57	329.5	52.52
P06731	Carcinoembryonic antigen-related cell adhesion molecule 5	493	TITVSAELPKPSISSNNSKPVEDK	Hex(8)HexNAc(2)	4243.92	4243.91	4	-2.4	6.29	426.53	191.08
P06731	Carcinoembryonic antigen-related cell adhesion molecule 5	199	TLTLFNVTR	Hex(5)HexNAc(5)Fuc(1)	3036.33	3036.33	3	0.2	4.84	284.74	115.55
P06731	Carcinoembryonic antigen-related cell adhesion molecule 5	555	TLTLFNVTR	Hex(5)HexNAc(5)Fuc(1)NeuAc(1)	3327.42	3327.42	3	0.2	2.99	278.94	113.49
P06756	Integrin alpha-V	73	ANTTQPGIVEGGQVLK	Hex(10)HexNAc(2)	3638.56	3638.54	3	-3.6	2.35	223.73	105.19
P06756	Integrin alpha-V	73	ANTTQPGIVEGGQVLK	Hex(3)HexNAc(5)Fuc(1)	3259.48	3259.48	3	-2.4	4.12	322.06	155.48
P06756	Integrin alpha-V	73	ANTTQPGIVEGGQVLK	Hex(4)HexNAc(3)Fuc(1)NeuAc(1)	3306.47	3306.48	3	0.8	5.73	355.2	131.07
P06756	Integrin alpha-V	73	ANTTQPGIVEGGQVLK	Hex(4)HexNAc(4)Fuc(1)	3218.46	3218.45	3	-1.2	9.06	634.36	317.09
P06756	Integrin alpha-V	73	ANTTQPGIVEGGQVLK	Hex(4)HexNAc(5)Fuc(1)	3421.54	3421.55	3	3.5	11.23	691.75	394.52
P06756	Integrin alpha-V	73	ANTTQPGIVEGGQVLK	Hex(4)HexNAc(5)Fuc(1)NeuAc(1)	3712.63	3712.63	3	-0.6	3.72	300.41	127.52
P06756	Integrin alpha-V	73	ANTTQPGIVEGGQVLK	Hex(5)HexNAc(2)	2828.29	2828.29	3	0.1	14.46	833.81	528.56
P06756	Integrin alpha-V	73	ANTTQPGIVEGGQVLK	Hex(5)HexNAc(3)Fuc(1)	3177.43	3177.44	3	1.8	5.28	268	159.86
P06756	Integrin alpha-V	73	ANTTQPGIVEGGQVLK	Hex(5)HexNAc(4)	3234.45	3234.45	3	0.9	6.66	469.99	244.19
P06756	Integrin alpha-V	73	ANTTQPGIVEGGQVLK	Hex(5)HexNAc(4)Fuc(1)	3380.51	3380.51	3	1.1	7.05	563.4	278.93
P06756	Integrin alpha-V	73	ANTTQPGIVEGGQVLK	Hex(5)HexNAc(5)Fuc(1)	3583.59	3583.61	3	4.8	4.68	321.35	162.13
P06756	Integrin alpha-V	73	ANTTQPGIVEGGQVLK	Hex(6)HexNAc(4)	3396.5	3396.5	3	0	6.69	514.91	252.87
P06756	Integrin alpha-V	73	ANTTQPGIVEGGQVLK	Hex(6)HexNAc(4)Fuc(1)	3542.56	3542.56	3	-0.2	6.9	531.02	304.64
P06756	Integrin alpha-V	73	ANTTQPGIVEGGQVLK	Hex(7)HexNAc(2)	3152.4	3152.4	3	0.5	12.5	720.44	454.07
P06756	Integrin alpha-V	73	ANTTQPGIVEGGQVLK	Hex(8)HexNAc(2)	3314.45	3314.45	3	0.9	12.53	731.94	456.48
P06756	Integrin alpha-V	942	ENQNHSYSLK	Hex(7)HexNAc(2)	2760.1	2760.1	3	2.1	5.98	366.44	171.19
P06756	Integrin alpha-V	942	ENQNHSYSLK	Hex(8)HexNAc(2)	2922.15	2922.16	3	1.8	5.66	363.96	134.41
P06756	Integrin alpha-V	942	ENQNHSYSLK	Hex(9)HexNAc(2)	3084.2	3084.21	3	3.2	4.96	277.43	145.49
P06756	Integrin alpha-V	865	ISSLQTTEKNDTVAGQGER	Hex(8)HexNAc(2)	3736.59	3736.59	3	1	11.35	675.38	437.32
P06756	Integrin alpha-V	865	ISSLQTTEKNDTVAGQGERDHLITK	Hex(8)HexNAc(2)	4443.99	4442.99	5	1.3	5.58	445.62	155.19
P06756	Integrin alpha-V	554	NMTISR	Hex(9)HexNAc(2)	2586	2586	2	-1.3	2.92	290.07	87.81
P06756	Integrin alpha-V	597	TAADTTGLQPILN+QFTPANISR	Hex(9)HexNAc(2)	4194.83	4194.84	3	2.8	5.37	387.52	10.78
P06756	Integrin alpha-V	597	TAADTTGLQPILNQFTPANISR	Hex(7)HexNAc(2)	3869.74	3869.76	3	4.9	8.09	562.09	303.31
P06756	Integrin alpha-V	597	TAADTTGLQPILNQFTPANISR	Hex(8)HexNAc(2)	4031.8	4031.8	3	0.1	14.61	815.71	289.47
P06756	Integrin alpha-V	597	TAADTTGLQPILNQFTPANISR	Hex(9)HexNAc(2)	4193.85	4193.84	4	-1.1	16.5	918.43	292.25
P06756	Integrin alpha-V	597	TAADTTGLQPxILNQFTPANISR	Hex(4)HexNAc(6)	4211.9	4210.89	3	-1.2	6.45	372.14	92.42
P07306	Asialoglycoprotein receptor 1	75	ETFSNFTASTEAQVK	Hex(7)HexNAc(2)	3200.31	3200.33	3	4.1	2.4	230.1	81.85
P07306	Asialoglycoprotein receptor 1	75	ETFSNFTASTEAQVK	Hex(8)HexNAc(2)	3362.37	3362.37	3	0.3	6.29	416.28	276.01
P07306	Asialoglycoprotein receptor 1	72	GLRETFSNFTASTEAQVK	Hex(7)HexNAc(6)Fuc(1)	4484.9	4485.92	4	4.4	2.52	257.84	179.82
P07602	Prosaposin	79	DNATEEEILVYLEK	Hex(10)HexNAc(2)	3692.51	3692.53	2	4.4	12	702.54	496.76
P07602	Prosaposin	79	DNATEEEILVYLEK	Hex(4)HexNAc(4)Fuc(2)NeuAc(1)	3709.56	3709.55	3	-3.5	6.08	459.18	267.68
P07602	Prosaposin	79	DNATEEEILVYLEK	Hex(8)HexNAc(2)	3368.4	3368.41	3	0.9	13.35	772.22	612.61
P07602	Prosaposin	79	DNATEEEILVYLEK	Hex(9)HexNAc(2)	3530.46	3530.46	3	2.2	13.14	754.82	538.26
P07602	Prosaposin	328	LIDNNKTEK	Hex(6)HexNAc(2)	2453.05	2453.05	3	-2.7	2.19	233.44	67.48
P07602	Prosaposin	328	LIDNNKTEK	Hex(7)HexNAc(2)	2615.11	2615.11	3	-0.9	3.06	288.32	66.31
P07602	Prosaposin	328	LIDNNKTEK	Hex(8)HexNAc(2)	2777.16	2777.16	3	-0.8	6	454.74	245.4
P07602	Prosaposin	328	LIDNNKTEK	Hex(9)HexNAc(2)	2939.21	2939.21	3	-1.8	5.47	396.73	172.14
P07602	Prosaposin	328	LIDNNKTEKEILDAFDK	Hex(7)HexNAc(6)NeuAc(2)	4941.08	4940.07	4	-2.1	5.17	420.92	199.22
P07602	Prosaposin	426	NSTKQEILAALEK	Hex(9)HexNAc(2)	3309.43	3309.43	3	-0.7	4.12	351.93	67.66
P07602	Prosaposin	422	NLEKNSTKQEILAALEK	Hex(8)HexNAc(2)	3631.65	3631.65	4	0.2	5.73	502.32	263.98
P07602	Prosaposin	422	NLEKNSTKQEILAALEK	Hex(9)HexNAc(2)	3793.7	3793.7	4	0.9	4.76	407.85	131.34
P07602	Prosaposin	93	TC*DWLPKPNMSASC*K	Hex(4)HexNAc(4)Fuc(1)	3401.38	3401.37	3	-4.3	5.3	304.9	167.43
P07602	Prosaposin	93	TC*DWLPKPNMSASC*K	Hex(5)HexNAc(5)Fuc(1)NeuAc(1)	4057.61	4056.61	3	-0.7	6.76	470.14	185.62
P07602	Prosaposin	93	TC*DWLPKPNMSASC*K	Hex(8)HexNAc(2)	3497.38	3497.38	3	-0.1	8.49	567.66	309.38
P07602	Prosaposin	93	TC*DWLPxKPNMSASC*K	Hex(5)HexNAc(5)Fuc(1)	3782.51	3782.52	3	1.3	4.87	273.47	13.2
P07602	Prosaposin	214	TNSTFVQ+ALVEHVKEEC*DR	Hex(4)HexNAc(6)	4129.75	4128.74	4	-1.2	6.69	490.82	316.52
P07602	Prosaposin	214	TNSTFVQ+ALVEHVKEEC*DR	Hex(5)HexNAc(5)Fuc(1)NeuAc(1)	4525.88	4524.86	3	-2.8	2.86	314.14	90.6
P07602	Prosaposin	214	TNSTFVQALVEHVK	Hex(10)HexNAc(2)	3599.53	3599.52	3	-1.8	5.77	343.38	167.97
P07602	Prosaposin	214	TNSTFVQALVEHVK	Hex(4)HexNAc(5)Fuc(1)	3382.5	3382.5	3	-2.2	2.92	300.42	118.6
P07602	Prosaposin	214	TNSTFVQALVEHVK	Hex(5)HexNAc(4)Fuc(1)NeuAc(1)	3632.57	3632.58	3	0.8	5.17	318.59	102.35
P07602	Prosaposin	214	TNSTFVQALVEHVK	Hex(5)HexNAc(4)Fuc(1)NeuAc(2)	3923.67	3923.67	3	0.6	2.96	297.91	75.03
P07602	Prosaposin	214	TNSTFVQALVEHVK	Hex(5)HexNAc(5)Fuc(1)NeuAc(1)	3835.65	3835.66	3	1.1	7.03	560.29	280.46
P07602	Prosaposin	214	TNSTFVQALVEHVK	Hex(5)HexNAc(5)Fuc(1)NeuAc(2)	4126.75	4126.75	3	1.1	6.84	508.64	56.8
P07602	Prosaposin	214	TNSTFVQALVEHVK	Hex(5)HexNAc(5)Fuc(2)NeuAc(1)	3981.71	3981.71	3	1	6.74	502.85	277.55
P07602	Prosaposin	214	TNSTFVQALVEHVK	Hex(6)HexNAc(5)Fuc(3)NeuAc(2)	4580.92	4579.92	4	2.5	8.99	620.26	253.45
P07602	Prosaposin	214	TNSTFVQALVEHVK	Hex(7)HexNAc(6)Fuc(2)NeuAc(1)	4508.9	4507.9	4	0.8	5.18	275.32	35.73
P07602	Prosaposin	214	TNSTFVQALVEHVK	Hex(8)HexNAc(2)	3275.42	3275.41	3	-2.5	9.13	641.97	376.36
P07602	Prosaposin	214	TNSTFVQALVEHVK	Hex(9)HexNAc(2)	3437.47	3437.47	3	0.4	7.41	575.13	369.83
P07602	Prosaposin	214	TNSTFVQALVEHVKEEC*DR	Hex(3)HexNAc(4)Fuc(1)	3706.62	3706.62	4	0.3	6.04	415.89	250.47
P07602	Prosaposin	214	TNSTFVQALVEHVKEEC*DR	Hex(3)HexNAc(5)Fuc(1)	3909.7	3909.7	4	1	6	344	248.21
P07602	Prosaposin	214	TNSTFVQALVEHVKEEC*DR	Hex(4)HexNAc(5)Fuc(1)	4071.75	4071.74	4	-1.5	6.84	518.07	172.68
P07602	Prosaposin	214	TNSTFVQALVEHVKEEC*DR	Hex(4)HexNAc(5)Fuc(1)NeuAc(1)	4362.84	4361.84	4	0.3	6.08	347.26	171.22
P07602	Prosaposin	214	TNSTFVQALVEHVKEEC*DR	Hex(4)HexNAc(5)NeuAc(1)	4216.79	4215.8	4	3.7	2.06	202.84	156.81
P07602	Prosaposin	214	TNSTFVQALVEHVKEEC*DR	Hex(5)HexNAc(4)Fuc(1)NeuAc(1)	4321.82	4321.82	4	0.3	6.1	416.94	73.52
P07602	Prosaposin	214	TNSTFVQALVEHVKEEC*DR	Hex(5)HexNAc(4)Fuc(2)NeuAc(1)	4467.87	4468.88	4	-0.4	6.12	390.8	106.69
P07602	Prosaposin	214	TNSTFVQALVEHVKEEC*DR	Hex(5)HexNAc(5)Fuc(1)	4233.8	4233.79	4	-1.5	6.8	514.03	143.68
P07602	Prosaposin	214	TNSTFVQALVEHVKEEC*DR	Hex(5)HexNAc(5)Fuc(1)NeuAc(1)	4524.9	4524.9	4	0.9	6.69	485.48	74.08
P07602	Prosaposin	214	TNSTFVQALVEHVKEEC*DR	Hex(5)HexNAc(5)Fuc(1)NeuAc(2)	4815.99	4816.99	4	-0.9	5.15	370.15	21.85
P07602	Prosaposin	214	TNSTFVQALVEHVKEEC*DR	Hex(5)HexNAc(5)Fuc(2)	4379.86	4378.85	4	-0.2	6.1	363.54	21.95
P07602	Prosaposin	214	TNSTFVQALVEHVKEEC*DR	Hex(5)HexNAc(5)Fuc(2)NeuAc(1)	4670.95	4670.96	4	0.9	6.6	452.21	55.25
P07602	Prosaposin	214	TNSTFVQALVEHVKEEC*DR	Hex(6)HexNAc(6)Fuc(1)NeuAc(1)	4890.03	4889	4	-4.5	5.99	435.42	207.25
P07602	Prosaposin	214	TNSTFVQALVEHVKEEC*DR	Hex(6)HexNAc(6)Fuc(2)NeuAc(1)	5036.09	5037.1	4	2.9	2.57	222.5	52.01
P07602	Prosaposin	214	TNSTFVQALVEHVKEEC*DR	Hex(8)HexNAc(2)	3964.66	3964.66	4	-1.4	15.11	855.78	645.06
P07602	Prosaposin	214	TNSTFVQALVEHVKEEC*DR	Hex(9)HexNAc(2)	4126.72	4126.72	4	0.3	15.31	873.92	279.83
P07942	Laminin subunit beta-1	675	GTNYTVR	Hex(9)HexNAc(2)	2675.04	2675.05	2	2.9	2.42	245.29	35.73
P07942	Laminin subunit beta-1	1027	KC*VC*NYLGTVQEHC*NGSDC*QC*DK	Hex(5)HexNAc(2)	4048.55	4047.53	4	-4.4	6.14	410.52	292.77
P07942	Laminin subunit beta-1	1271	LSDTTSQSNSTAK	Hex(8)HexNAc(2)	3042.21	3042.22	3	3.1	9.14	619.51	368.5
P08174	Complement decay-accelerating factor	84	GSQWSDIEEFC*NR	Hex(4)HexNAc(5)NeuAc(1)	3582.38	3582.38	3	-2	6.11	496.81	156.83
P08174	Complement decay-accelerating factor	84	GSQWSDIEEFC*NR	Hex(5)HexNAc(5)Fuc(1)NeuAc(1)	3890.49	3890.5	3	1.2	5.33	384.75	89.58
P08174	Complement decay-accelerating factor	84	GSQWSDIEEFC*NR	Hex(5)HexNAc(5)NeuAc(1)	3744.44	3744.44	3	0.5	5.82	424.41	126.61
P08174	Complement decay-accelerating factor	84	GSQWSDIEEFC*NR	Hex(5)HexNAc(5)NeuAc(2)	4035.53	4035.53	4	-0.7	5.17	320.02	91.8
P08195	4F2 cell-surface antigen heavy chain	355	DASSFLAEWQNITK	Hex(10)HexNAc(2)	3636.47	3636.49	3	3.6	4.01	274.56	96.06
P08195	4F2 cell-surface antigen heavy chain	355	DASSFLAEWQNITK	Hex(4)HexNAc(3)Fuc(1)NeuAc(1)	3304.39	3304.39	3	1.3	2	207.1	46.13
P08195	4F2 cell-surface antigen heavy chain	355	DASSFLAEWQNITK	Hex(5)HexNAc(4)Fuc(1)NeuAc(1)	3669.52	3669.53	3	1.9	2.87	238.39	63.4
P08195	4F2 cell-surface antigen heavy chain	355	DASSFLAEWQNITK	Hex(5)HexNAc(4)Fuc(1)NeuAc(2)	3960.62	3960.62	3	2	6.11	383.48	229.46
P08195	4F2 cell-surface antigen heavy chain	355	DASSFLAEWQNITK	Hex(5)HexNAc(5)Fuc(1)NeuAc(1)	3872.6	3872.61	3	2.6	5.58	351.77	143.46
P08195	4F2 cell-surface antigen heavy chain	355	DASSFLAEWQNITK	Hex(5)HexNAc(5)Fuc(1)NeuAc(2)	4163.7	4163.69	3	-2.4	5.75	405.02	232.68
P08195	4F2 cell-surface antigen heavy chain	355	DASSFLAEWQNITK	Hex(6)HexNAc(5)Fuc(1)NeuAc(2)	4325.75	4325.75	3	-0.7	6.25	426.91	28.23
P08195	4F2 cell-surface antigen heavy chain	355	DASSFLAEWQNITK	Hex(6)HexNAc(5)Fuc(1)NeuAc(3)	4616.84	4616.85	3	0.4	6.33	421.74	16.66
P08195	4F2 cell-surface antigen heavy chain	355	DASSFLAEWQNITK	Hex(6)HexNAc(5)Fuc(2)NeuAc(1)	4180.71	4181.73	3	4.1	4.64	304.34	45.82
P08195	4F2 cell-surface antigen heavy chain	355	DASSFLAEWQNITK	Hex(6)HexNAc(5)Fuc(2)NeuAc(2)	4471.81	4471.81	3	1.7	5.77	358.1	12.05
P08195	4F2 cell-surface antigen heavy chain	355	DASSFLAEWQNITK	Hex(6)HexNAc(5)Fuc(3)NeuAc(1)	4326.77	4327.79	3	3.4	2.91	243.5	73.71
P08195	4F2 cell-surface antigen heavy chain	355	DASSFLAEWQNITK	Hex(6)HexNAc(6)Fuc(1)NeuAc(1)	4237.73	4237.74	3	2.3	5.72	413.34	55.62
P08195	4F2 cell-surface antigen heavy chain	355	DASSFLAEWQNITK	Hex(6)HexNAc(6)Fuc(1)NeuAc(2)	4528.83	4528.83	3	0.6	6.3	425.78	26.39
P08195	4F2 cell-surface antigen heavy chain	355	DASSFLAEWQNITK	Hex(6)HexNAc(6)Fuc(1)NeuAc(3)	4819.92	4819.92	3	0	6.12	395.67	17.55
P08195	4F2 cell-surface antigen heavy chain	355	DASSFLAEWQNITK	Hex(6)HexNAc(6)Fuc(2)NeuAc(1)	4383.79	4383.81	3	4.2	5.71	399.15	41.06
P08195	4F2 cell-surface antigen heavy chain	355	DASSFLAEWQNITK	Hex(6)HexNAc(6)Fuc(2)NeuAc(2)	4674.89	4673.9	3	3.9	4.57	263.31	109.95
P08195	4F2 cell-surface antigen heavy chain	355	DASSFLAEWQNITK	Hex(6)HexNAc(6)Fuc(3)NeuAc(1)	4529.85	4528.86	3	2.4	2.92	230.49	66.86
P08195	4F2 cell-surface antigen heavy chain	355	DASSFLAEWQNITK	Hex(7)HexNAc(5)Fuc(2)NeuAc(2)	4633.86	4633.86	3	0.3	5.46	313.07	158.66
P08195	4F2 cell-surface antigen heavy chain	355	DASSFLAEWQNITK	Hex(7)HexNAc(6)Fuc(2)NeuAc(2)	4836.94	4836.93	3	-1.6	2.21	215.33	17.21
P08195	4F2 cell-surface antigen heavy chain	355	DASSFLAEWQNITK	Hex(7)HexNAc(6)Fuc(4)NeuAc(4)	5711.24	5712.24	4	-1	2.48	214.56	162.03
P08195	4F2 cell-surface antigen heavy chain	355	DASSFLAEWQNITK	Hex(7)HexNAc(6)Fuc(5)NeuAc(4)	5857.3	5858.31	4	1.1	2.03	110.53	44.35
P08195	4F2 cell-surface antigen heavy chain	355	DASSFLAEWQNITK	Hex(9)HexNAc(2)	3474.42	3474.42	3	0.2	6.47	457.84	295.55
P08195	4F2 cell-surface antigen heavy chain	417	SLVTQYLNATGNR	Hex(8)HexNAc(2)	3139.33	3139.33	3	-1.2	5.33	304.76	178.69
P08582	Melanotransferrin	503	DC*DVLTAVSEFFNASC*VPVNNPK	Hex(4)HexNAc(5)Fuc(1)	4392.85	4392.87	3	3.6	6.06	358.18	289.02
P08582	Melanotransferrin	503	DC*DVLTAVSEFFNASC*VPVNNPK	Hex(5)HexNAc(5)Fuc(1)	4554.9	4553.92	4	4.2	5.02	233.43	229.77
P08582	Melanotransferrin	129	SC*HTGINR	Hex(6)HexNAc(2)	2322.91	2322.91	3	-1.4	5.32	374.24	108.73
P08582	Melanotransferrin	129	SC*HTGINR	Hex(7)HexNAc(2)	2484.97	2484.96	3	-0.7	6.07	439.19	153.09
P08582	Melanotransferrin	129	SC*HTGINR	Hex(8)HexNAc(2)	2647.02	2647.02	3	-0.4	6.11	432.82	155.59
P08582	Melanotransferrin	129	SC*HTGINR	Hex(9)HexNAc(2)	2809.07	2809.07	3	-0.3	5.44	413.74	119.15
P08648	Integrin alpha-5	864	VTGLNC*TTNHPINPK	Hex(5)HexNAc(5)Fuc(2)NeuAc(1)	4074.71	4074.71	3	1.1	3.91	334.78	82.72
P08962	CD63 antigen	129	NNHTASILDR	Hex(10)HexNAc(2)	3167.26	3167.26	3	-1.4	6.15	454.71	191.79
P08962	CD63 antigen	129	NNHTASILDR	Hex(4)HexNAc(3)Fuc(1)NeuAc(1)	2835.18	2835.18	3	0.5	6.48	453.46	207.85
P08962	CD63 antigen	129	NNHTASILDR	Hex(5)HexNAc(3)Fuc(1)NeuAc(1)	2997.23	2997.23	3	1.1	5.34	353.77	83.73
P08962	CD63 antigen	129	NNHTASILDR	Hex(5)HexNAc(4)Fuc(1)NeuAc(1)	3200.31	3200.31	3	-1	5.64	356.52	154.77
P08962	CD63 antigen	129	NNHTASILDR	Hex(5)HexNAc(4)Fuc(1)NeuAc(2)	3491.41	3491.41	3	0.3	5.53	386.51	116.46
P08962	CD63 antigen	129	NNHTASILDR	Hex(5)HexNAc(5)Fuc(1)	3112.29	3112.29	3	-0.1	4.82	291.45	87.59
P08962	CD63 antigen	129	NNHTASILDR	Hex(5)HexNAc(5)Fuc(1)NeuAc(1)	3403.39	3403.39	3	0.7	6.38	453.17	180.82
P08962	CD63 antigen	129	NNHTASILDR	Hex(5)HexNAc(5)Fuc(1)NeuAc(2)	3694.49	3694.49	3	2.6	5.79	378.25	156.18
P08962	CD63 antigen	129	NNHTASILDR	Hex(5)HexNAc(5)Fuc(2)	3258.35	3258.37	3	4.3	2.59	232.62	64.02
P08962	CD63 antigen	129	NNHTASILDR	Hex(5)HexNAc(5)Fuc(2)NeuAc(1)	3549.45	3549.45	3	1.6	3.78	261.47	61.55
P08962	CD63 antigen	129	NNHTASILDR	Hex(6)HexNAc(3)NeuAc(1)	3013.23	3013.24	3	3.6	5.71	380.65	153.7
P08962	CD63 antigen	129	NNHTASILDR	Hex(6)HexNAc(5)Fuc(1)NeuAc(1)	3565.44	3565.44	3	-1.5	5.32	373.01	117.66
P08962	CD63 antigen	129	NNHTASILDR	Hex(6)HexNAc(5)Fuc(1)NeuAc(2)	3856.54	3856.54	3	0.1	6.34	438.76	202.53
P08962	CD63 antigen	129	NNHTASILDR	Hex(6)HexNAc(5)Fuc(1)NeuAc(3)	4147.63	4147.65	3	3.6	5.97	383.72	19.54
P08962	CD63 antigen	129	NNHTASILDR	Hex(6)HexNAc(5)Fuc(2)NeuAc(2)	4002.6	4001.61	3	3.7	5.4	375.67	114.97
P08962	CD63 antigen	129	NNHTASILDR	Hex(6)HexNAc(5)Fuc(3)	3566.46	3566.46	3	-0.2	2	163.89	46.16
P08962	CD63 antigen	129	NNHTASILDR	Hex(6)HexNAc(5)Fuc(3)NeuAc(2)	4148.65	4147.66	3	1.1	5.53	303.42	138.83
P08962	CD63 antigen	129	NNHTASILDR	Hex(6)HexNAc(6)Fuc(1)NeuAc(1)	3768.52	3768.5	3	-4.8	5.8	476.67	192.6
P08962	CD63 antigen	129	NNHTASILDR	Hex(6)HexNAc(6)Fuc(1)NeuAc(2)	4059.62	4059.62	3	0	6.21	425.46	59.27
P08962	CD63 antigen	129	NNHTASILDR	Hex(6)HexNAc(6)Fuc(1)NeuAc(3)	4350.71	4350.73	3	3.6	5.78	392.15	32.62
P08962	CD63 antigen	129	NNHTASILDR	Hex(6)HexNAc(6)Fuc(2)NeuAc(1)	3914.58	3914.6	3	4.6	5.25	411.06	136.4
P08962	CD63 antigen	129	NNHTASILDR	Hex(6)HexNAc(6)Fuc(2)NeuAc(2)	4205.68	4204.66	3	-2.5	5.49	343.6	33.24
P08962	CD63 antigen	129	NNHTASILDR	Hex(6)HexNAc(6)Fuc(3)NeuAc(2)	4351.73	4350.74	3	1.2	5.34	319.52	109.35
P08962	CD63 antigen	129	NNHTASILDR	Hex(6)HexNAc(6)Fuc(4)NeuAc(2)	4497.79	4497.8	3	1.2	2	187.52	52.85
P08962	CD63 antigen	129	NNHTASILDR	Hex(6)HexNAc(6)Fuc(5)NeuAc(2)	4643.85	4644.84	4	-1.8	3.79	257.71	92.9
P08962	CD63 antigen	129	NNHTASILDR	Hex(6)HexNAc(6)NeuAc(2)	3913.56	3913.56	3	1.2	5.12	283.38	125.21
P08962	CD63 antigen	129	NNHTASILDR	Hex(6)HexNAc(7)Fuc(3)NeuAc(1)	4263.72	4263.72	3	1.4	5.21	328.95	75.78
P08962	CD63 antigen	129	NNHTASILDR	Hex(7)HexNAc(2)	2681.1	2681.1	3	-2	5.55	367.03	134.85
P08962	CD63 antigen	129	NNHTASILDR	Hex(7)HexNAc(6)Fuc(2)NeuAc(1)	4076.63	4076.64	3	2	4.63	276.38	84.25
P08962	CD63 antigen	129	NNHTASILDR	Hex(7)HexNAc(7)Fuc(4)NeuAc(1)	4571.83	4572.84	3	0.9	5.14	317.54	116.77
P08962	CD63 antigen	129	NNHTASILDR	Hex(8)HexNAc(2)	2843.16	2843.16	3	2	6.63	525.67	245.05
P08962	CD63 antigen	129	NNHTASILDR	Hex(9)HexNAc(2)	3005.21	3005.21	3	0.8	6.71	517.66	238.69
P09681	Gastric inhibitory polypeptide	89	HNITQR	Hex(10)HexNAc(2)	2795.1	2795.09	3	-3.5	2.11	268.74	29.19
P09681	Gastric inhibitory polypeptide	89	HNITQR	Hex(4)HexNAc(3)Fuc(2)	2317.98	2317.97	3	-2.9	2.04	243.21	20
P09681	Gastric inhibitory polypeptide	89	HNITQR	Hex(4)HexNAc(4)Fuc(1)NeuAc(1)	2666.09	2666.09	3	-1.4	2.1	249.74	20
P09681	Gastric inhibitory polypeptide	89	HNITQR	Hex(4)HexNAc(5)NeuAc(1)	2723.11	2723.11	3	0.1	2.2	285.19	42.37
P09681	Gastric inhibitory polypeptide	89	HNITQR	Hex(5)HexNAc(3)	2187.91	2187.91	3	-1.7	2	231.58	20
P09681	Gastric inhibitory polypeptide	89	HNITQR	Hex(5)HexNAc(3)Fuc(1)	2333.97	2333.97	3	-1.2	2.21	288.24	28.1
P09681	Gastric inhibitory polypeptide	89	HNITQR	Hex(5)HexNAc(3)Fuc(1)NeuAc(1)	2625.07	2625.06	3	-0.7	2.21	333.87	13.53
P09681	Gastric inhibitory polypeptide	89	HNITQR	Hex(5)HexNAc(3)Fuc(2)	2480.03	2480.03	3	-1.7	2.05	299.6	10.82
P09681	Gastric inhibitory polypeptide	89	HNITQR	Hex(5)HexNAc(3)NeuAc(1)	2479.01	2479	3	-1.7	2.12	318.51	11.4
P09681	Gastric inhibitory polypeptide	89	HNITQR	Hex(5)HexNAc(4)Fuc(1)	2537.05	2537.05	3	-0.3	2.69	289.06	63.19
P09681	Gastric inhibitory polypeptide	89	HNITQR	Hex(5)HexNAc(4)Fuc(1)NeuAc(1)	2828.15	2828.15	3	1	2.23	265.35	35.41
P09681	Gastric inhibitory polypeptide	89	HNITQR	Hex(5)HexNAc(4)NeuAc(1)	2682.09	2682.09	3	-1.2	2.18	263.31	34.85
P09681	Gastric inhibitory polypeptide	89	HNITQR	Hex(5)HexNAc(5)Fuc(1)NeuAc(1)	3031.23	3031.23	3	0	2.03	279.51	13.99
P09681	Gastric inhibitory polypeptide	89	HNITQR	Hex(6)HexNAc(3)	2349.97	2349.96	3	-4.1	2.25	299.96	40.61
P09681	Gastric inhibitory polypeptide	89	HNITQR	Hex(6)HexNAc(3)Fuc(1)	2496.02	2496.02	3	-1.2	2.27	313.86	23.24
P09681	Gastric inhibitory polypeptide	89	HNITQR	Hex(6)HexNAc(3)Fuc(1)NeuAc(1)	2787.12	2787.12	3	1.2	2.29	376.16	14.53
P09681	Gastric inhibitory polypeptide	89	HNITQR	Hex(6)HexNAc(4)Fuc(1)	2699.1	2699.1	3	-0.6	2.25	298.2	25.75
P09681	Gastric inhibitory polypeptide	89	HNITQR	Hex(6)HexNAc(4)Fuc(1)NeuAc(1)	2990.2	2990.2	3	-0.8	2.21	331.4	13.45
P09681	Gastric inhibitory polypeptide	89	HNITQR	Hex(7)HexNAc(2)	2308.94	2308.94	3	-0.8	2.25	291.53	28.99
P09681	Gastric inhibitory polypeptide	89	HNITQR	Hex(7)HexNAc(4)Fuc(1)	2861.16	2861.15	3	-1.5	2.18	260.6	37.66
P09681	Gastric inhibitory polypeptide	89	HNITQR	Hex(7)HexNAc(4)Fuc(1)NeuAc(1)	3152.25	3152.24	3	-2.8	2.25	268.1	43.95
P09681	Gastric inhibitory polypeptide	89	HNITQR	Hex(7)HexNAc(4)NeuAc(1)	3006.19	3006.19	3	-2	2.19	331.63	10.11
P09681	Gastric inhibitory polypeptide	89	HNITQR	Hex(8)HexNAc(2)	2470.99	2470.98	3	-3.3	2.11	278.04	33.83
P09681	Gastric inhibitory polypeptide	89	HNITQR	Hex(5)HexNAc(3)Fuc(2)NeuAc(1)	2771.12	2771.11	3	-4.8	2.19	264.7	53.45
P10316	HLA class I histocompatibility antigen, A-69 alpha chain	107	GYYNQSEAGSHTVQR	Hex(10)HexNAc(2)	3723.45	3723.46	3	1.5	12.58	730.65	559.62
P10316	HLA class I histocompatibility antigen, A-69 alpha chain	107	GYYNQSEAGSHTVQR	Hex(3)HexNAc(5)Fuc(1)	3344.38	3344.4	3	4.8	3.86	293.09	148.91
P10316	HLA class I histocompatibility antigen, A-69 alpha chain	107	GYYNQSEAGSHTVQR	Hex(4)HexNAc(5)Fuc(1)NeuAc(1)	3797.53	3797.53	3	0.7	6.28	366.1	169.65
P10316	HLA class I histocompatibility antigen, A-69 alpha chain	107	GYYNQSEAGSHTVQR	Hex(5)HexNAc(5)Fuc(1)	3668.49	3668.5	3	4.4	6.53	536	261.03
P10316	HLA class I histocompatibility antigen, A-69 alpha chain	107	GYYNQSEAGSHTVQR	Hex(5)HexNAc(5)Fuc(1)NeuAc(1)	3959.58	3959.59	3	2	7.14	566.97	274.01
P10316	HLA class I histocompatibility antigen, A-69 alpha chain	107	GYYNQSEAGSHTVQR	Hex(5)HexNAc(5)Fuc(1)NeuAc(2)	4250.68	4250.69	3	2.9	6.95	565.85	39.63
P10316	HLA class I histocompatibility antigen, A-69 alpha chain	107	GYYNQSEAGSHTVQR	Hex(5)HexNAc(5)Fuc(2)NeuAc(1)	4105.64	4105.65	3	3.4	6.49	499.85	56.94
P10316	HLA class I histocompatibility antigen, A-69 alpha chain	107	GYYNQSEAGSHTVQR	Hex(5)HexNAc(5)NeuAc(1)	3813.52	3813.53	3	2.6	6	374.17	144.06
P10316	HLA class I histocompatibility antigen, A-69 alpha chain	107	GYYNQSEAGSHTVQR	Hex(5)HexNAc(5)NeuAc(2)	4104.62	4105.63	3	2.7	6.32	438.35	32.55
P10316	HLA class I histocompatibility antigen, A-69 alpha chain	107	GYYNQSEAGSHTVQR	Hex(6)HexNAc(2)	3075.24	3075.26	3	4.5	2.48	228.79	107.62
P10316	HLA class I histocompatibility antigen, A-69 alpha chain	107	GYYNQSEAGSHTVQR	Hex(7)HexNAc(2)	3237.3	3237.3	3	0.8	7.23	478.69	361.32
P10316	HLA class I histocompatibility antigen, A-69 alpha chain	107	GYYNQSEAGSHTVQR	Hex(8)HexNAc(2)	3399.35	3399.35	3	1.1	10.64	642.05	533.3
P10316	HLA class I histocompatibility antigen, A-69 alpha chain	107	GYYNQSEAGSHTVQR	Hex(9)HexNAc(2)	3561.4	3561.41	3	2.6	12.43	724.23	572.64
P10321	HLA class I histocompatibility antigen, Cw-7 alpha chain	107	GYYNQSEDGSHTLQR	Hex(10)HexNAc(2)	3781.46	3781.46	3	0.9	12.64	749.72	522.45
P10321	HLA class I histocompatibility antigen, Cw-7 alpha chain	107	GYYNQSEDGSHTLQR	Hex(7)HexNAc(2)	3295.3	3295.31	3	1.5	6.37	417.65	261.52
P10321	HLA class I histocompatibility antigen, Cw-7 alpha chain	107	GYYNQSEDGSHTLQR	Hex(8)HexNAc(2)	3457.35	3457.35	3	0.2	11.61	685.64	453.33
P10321	HLA class I histocompatibility antigen, Cw-7 alpha chain	107	GYYNQSEDGSHTLQR	Hex(9)HexNAc(2)	3619.41	3619.41	3	2.2	13.56	775.76	580.37
P10586	Receptor-type tyrosine-protein phosphatase F	957	DINSQQELQNITTDTR	Hex(5)HexNAc(5)Fuc(1)	3847.62	3847.61	3	-4	3.8	311.91	149.05
P10586	Receptor-type tyrosine-protein phosphatase F	957	DINSQQELQNITTDTR	Hex(5)HexNAc(5)Fuc(1)NeuAc(1)	4138.72	4138.73	3	1.8	6.67	483.59	59.33
P10586	Receptor-type tyrosine-protein phosphatase F	957	DINSQQELQNITTDTR	Hex(5)HexNAc(5)Fuc(1)NeuAc(2)	4429.81	4430.81	3	-2.8	5.76	406.65	150.22
P10586	Receptor-type tyrosine-protein phosphatase F	957	DINSQQELQNITTDTR	Hex(5)HexNAc(5)Fuc(2)NeuAc(1)	4284.78	4283.78	3	0.6	6.44	396.81	42.39
P10586	Receptor-type tyrosine-protein phosphatase F	714	KVEVEPLNSTAVHVYWK	Hex(5)HexNAc(5)Fuc(1)	3970.78	3970.78	4	0	6.14	365.14	141.25
P10586	Receptor-type tyrosine-protein phosphatase F	714	KVEVEPLNSTAVHVYWK	Hex(5)HexNAc(5)Fuc(1)NeuAc(1)	4261.88	4261.89	4	1.9	6.91	558.38	76.61
P10721	Mast/stem cell growth factor receptor Kit	485	HNGTVEC*K	Hex(8)HexNAc(2)	2647.01	2647	3	-2.1	3.12	261.25	158.73
P10909	Clusterin	290	HNSTGC*LR	Hex(10)HexNAc(2)	2971.12	2971.12	3	-0.8	5.35	373.32	97.53
P10909	Clusterin	290	HNSTGC*LR	Hex(6)HexNAc(2)	2322.91	2322.91	3	0.2	2.52	253.32	31.88
P10909	Clusterin	290	HNSTGC*LR	Hex(7)HexNAc(2)	2484.97	2484.96	3	-1.6	2.71	283.32	24.64
P10909	Clusterin	290	HNSTGC*LR	Hex(8)HexNAc(2)	2647.02	2647.02	3	1.4	6.08	341.65	263.81
P10909	Clusterin	290	HNSTGC*LR	Hex(9)HexNAc(2)	2809.07	2809.07	3	-1.4	5.28	413.09	107.82
P10909	Clusterin	372	LANLTQGEDQYYLR	Hex(8)HexNAc(2)	3386.41	3386.42	3	2.2	6.83	565.14	325.33
P11047	Laminin subunit gamma-1	1390	KIPAINQTITEANEK	Hex(8)HexNAc(2)	3372.49	3372.49	3	0.5	9.61	584.97	350.84
P11047	Laminin subunit gamma-1	647	LLNNLTSIK	Hex(8)HexNAc(2)	2718.2	2718.2	2	2.1	6.14	415.74	234.34
P11047	Laminin subunit gamma-1	647	LLNNLTSIK	Hex(9)HexNAc(2)	2880.25	2880.25	2	1.1	6.53	451.74	248.71
P11047	Laminin subunit gamma-1	1241	NISQDLEK	Hex(4)HexNAc(5)Fuc(1)	2756.15	2756.14	3	-2.6	2.21	273.84	11.72
P11047	Laminin subunit gamma-1	1241	NISQDLEK	Hex(8)HexNAc(2)	2649.07	2649.08	2	4.8	2.92	414.11	28.64
P11047	Laminin subunit gamma-1	1203	TANDTSTEAYN+LLLR	Hex(9)HexNAc(2)	3547.46	3547.47	3	3.3	2	212.75	85.72
P11047	Laminin subunit gamma-1	1203	TANDTSTEAYNLLLR	Hex(7)HexNAc(2)	3222.37	3222.36	3	-1.6	12.34	742.13	518.39
P11047	Laminin subunit gamma-1	1203	TANDTSTEAYNLLLR	Hex(8)HexNAc(2)	3384.42	3384.42	3	1.3	13.48	758.24	545.98
P11047	Laminin subunit gamma-1	1203	TANDTSTEAYNLLLR	Hex(9)HexNAc(2)	3546.47	3546.47	3	-1.1	9.36	614.06	369.77
P11047	Laminin subunit gamma-1	1218	TLAGENQTAFEIEELNR	Hex(7)HexNAc(6)Fuc(2)NeuAc(1)	4871	4871.99	4	-2.3	7.22	560.39	187.91
P11047	Laminin subunit gamma-1	1218	TLAGENQTAFEIEELNR	Hex(8)HexNAc(2)	3637.53	3637.54	3	5	6.88	544.44	372.49
P11047	Laminin subunit gamma-1	1106	VNNTLSSQISR	Hex(4)HexNAc(5)Fuc(1)	3028.31	3028.31	3	0.6	5.88	362.71	146.04
P11047	Laminin subunit gamma-1	1106	VNNTLSSQISR	Hex(8)HexNAc(2)	2921.22	2921.23	3	1	6.57	513.34	243.71
P11047	Laminin subunit gamma-1	1106	VNNTLSSQISR	Hex(9)HexNAc(2)	3083.28	3083.28	3	0.5	5.9	400.45	183
P11279	Lysosome-associated membrane glycoprotein 1	62	NMTFDLPSDATVVLNR	Hex(6)HexNAc(4)NeuAc(1)	3868.62	3868.63	3	2.1	3.14	266.06	106.94
P11279	Lysosome-associated membrane glycoprotein 1	78	SSC*GKENTSDPSLVIAFGR	Hex(3)HexNAc(2)Fuc(1)	3063.35	3063.35	3	0.2	10.31	636.97	443.83
P11279	Lysosome-associated membrane glycoprotein 1	78	SSC*GKENTSDPSLVIAFGR	Hex(3)HexNAc(4)Fuc(1)	3469.5	3469.52	3	4	6.92	561.98	375.21
P11279	Lysosome-associated membrane glycoprotein 1	78	SSC*GKENTSDPSLVIAFGR	Hex(3)HexNAc(5)Fuc(1)	3672.58	3672.59	3	1.1	5.18	424.64	215.52
P11279	Lysosome-associated membrane glycoprotein 1	78	SSC*GKENTSDPSLVIAFGR	Hex(4)HexNAc(3)Fuc(1)	3428.48	3428.48	3	1	13.35	778.84	445.68
P11279	Lysosome-associated membrane glycoprotein 1	78	SSC*GKENTSDPSLVIAFGR	Hex(4)HexNAc(3)Fuc(1)NeuAc(1)	3719.57	3719.58	3	1.6	13.26	772.65	472.05
P11279	Lysosome-associated membrane glycoprotein 1	78	SSC*GKENTSDPSLVIAFGR	Hex(4)HexNAc(4)Fuc(1)	3631.56	3631.56	3	0.5	12.31	742.23	410.95
P11279	Lysosome-associated membrane glycoprotein 1	78	SSC*GKENTSDPSLVIAFGR	Hex(4)HexNAc(4)Fuc(1)NeuAc(1)	3922.65	3922.66	3	2.4	14.13	800.66	471.8
P11279	Lysosome-associated membrane glycoprotein 1	78	SSC*GKENTSDPSLVIAFGR	Hex(4)HexNAc(4)NeuAc(1)	3776.59	3776.6	3	0.1	2.16	272.72	39.85
P11279	Lysosome-associated membrane glycoprotein 1	78	SSC*GKENTSDPSLVIAFGR	Hex(4)HexNAc(5)Fuc(1)	3834.64	3834.65	3	2.3	10.2	693.98	371.99
P11279	Lysosome-associated membrane glycoprotein 1	78	SSC*GKENTSDPSLVIAFGR	Hex(4)HexNAc(5)Fuc(1)NeuAc(1)	4125.73	4125.74	3	2.2	9.9	662.1	113.82
P11279	Lysosome-associated membrane glycoprotein 1	78	SSC*GKENTSDPSLVIAFGR	Hex(5)HexNAc(3)NeuAc(1)	3735.57	3735.57	3	1.7	4.02	288.64	58.09
P11279	Lysosome-associated membrane glycoprotein 1	78	SSC*GKENTSDPSLVIAFGR	Hex(5)HexNAc(4)Fuc(1)	3793.61	3793.61	3	0.7	11.35	677.51	402.87
P11279	Lysosome-associated membrane glycoprotein 1	78	SSC*GKENTSDPSLVIAFGR	Hex(5)HexNAc(4)Fuc(1)NeuAc(1)	4084.71	4084.71	3	0.6	9.18	639.76	116.74
P11279	Lysosome-associated membrane glycoprotein 1	78	SSC*GKENTSDPSLVIAFGR	Hex(5)HexNAc(4)Fuc(1)NeuAc(2)	4375.8	4375.82	3	4.2	6.51	570.88	44.68
P11279	Lysosome-associated membrane glycoprotein 1	78	SSC*GKENTSDPSLVIAFGR	Hex(5)HexNAc(4)Fuc(3)	4085.73	4084.73	3	2.1	5.5	393.49	175.16
P11279	Lysosome-associated membrane glycoprotein 1	78	SSC*GKENTSDPSLVIAFGR	Hex(5)HexNAc(5)Fuc(1)	3996.69	3996.7	3	1.9	11.26	680.95	380.13
P11279	Lysosome-associated membrane glycoprotein 1	78	SSC*GKENTSDPSLVIAFGR	Hex(5)HexNAc(5)Fuc(1)NeuAc(1)	4287.78	4287.79	3	1.3	11.35	706.47	106.02
P11279	Lysosome-associated membrane glycoprotein 1	78	SSC*GKENTSDPSLVIAFGR	Hex(5)HexNAc(5)Fuc(1)NeuAc(2)	4578.88	4578.88	3	0.5	10.37	666.86	61.08
P11279	Lysosome-associated membrane glycoprotein 1	78	SSC*GKENTSDPSLVIAFGR	Hex(5)HexNAc(5)Fuc(2)NeuAc(1)	4433.84	4433.84	3	0.1	5.29	388.26	32.1
P11279	Lysosome-associated membrane glycoprotein 1	78	SSC*GKENTSDPSLVIAFGR	Hex(5)HexNAc(5)Fuc(2)NeuAc(2)	4724.94	4725.92	4	-3.6	2.72	307.71	171.43
P11279	Lysosome-associated membrane glycoprotein 1	78	SSC*GKENTSDPSLVIAFGR	Hex(5)HexNAc(5)Fuc(4)NeuAc(1)	4725.96	4725.97	3	1.8	5.29	375.03	43.74
P11279	Lysosome-associated membrane glycoprotein 1	78	SSC*GKENTSDPSLVIAFGR	Hex(5)HexNAc(5)NeuAc(1)	4141.73	4140.71	3	-3.8	2.92	263.77	140.54
P11279	Lysosome-associated membrane glycoprotein 1	78	SSC*GKENTSDPSLVIAFGR	Hex(5)HexNAc(6)Fuc(1)	4199.77	4199.78	3	2.2	8.03	595.76	326.92
P11279	Lysosome-associated membrane glycoprotein 1	78	SSC*GKENTSDPSLVIAFGR	Hex(5)HexNAc(6)Fuc(1)NeuAc(1)	4490.86	4490.86	3	-0.5	6.43	544.41	82.77
P11279	Lysosome-associated membrane glycoprotein 1	78	SSC*GKENTSDPSLVIAFGR	Hex(5)HexNAc(6)Fuc(1)NeuAc(2)	4781.96	4781.95	4	-1.2	2.98	280.75	129.35
P11279	Lysosome-associated membrane glycoprotein 1	78	SSC*GKENTSDPSLVIAFGR	Hex(5)HexNAc(6)Fuc(3)	4491.88	4490.89	3	1.4	4.49	327.32	106.99
P11279	Lysosome-associated membrane glycoprotein 1	78	SSC*GKENTSDPSLVIAFGR	Hex(5)HexNAc(6)Fuc(3)NeuAc(1)	4782.98	4783.98	4	-1.6	3.01	304.05	124.38
P11279	Lysosome-associated membrane glycoprotein 1	78	SSC*GKENTSDPSLVIAFGR	Hex(5)HexNAc(6)NeuAc(1)	4344.81	4344.81	3	-0.1	3.08	301.05	59.7
P11279	Lysosome-associated membrane glycoprotein 1	78	SSC*GKENTSDPSLVIAFGR	Hex(6)HexNAc(4)Fuc(1)	3955.66	3955.67	3	2.5	7.89	599.87	308.04
P11279	Lysosome-associated membrane glycoprotein 1	78	SSC*GKENTSDPSLVIAFGR	Hex(6)HexNAc(4)Fuc(1)NeuAc(1)	4246.76	4247.77	3	2.4	4.15	362.92	58
P11279	Lysosome-associated membrane glycoprotein 1	78	SSC*GKENTSDPSLVIAFGR	Hex(6)HexNAc(4)Fuc(3)	4247.78	4247.79	3	1.9	5.54	410.8	135.75
P11279	Lysosome-associated membrane glycoprotein 1	78	SSC*GKENTSDPSLVIAFGR	Hex(6)HexNAc(5)Fuc(1)	4158.74	4157.75	3	1.9	3.06	291.21	98.89
P11279	Lysosome-associated membrane glycoprotein 1	78	SSC*GKENTSDPSLVIAFGR	Hex(6)HexNAc(5)Fuc(1)NeuAc(1)	4449.84	4450.85	3	2.6	4.68	400.83	76.17
P11279	Lysosome-associated membrane glycoprotein 1	78	SSC*GKENTSDPSLVIAFGR	Hex(6)HexNAc(5)Fuc(1)NeuAc(2)	4740.93	4741.93	4	-0.7	3.13	221.03	30.95
P11279	Lysosome-associated membrane glycoprotein 1	78	SSC*GKENTSDPSLVIAFGR	Hex(6)HexNAc(5)Fuc(2)	4304.8	4303.78	4	-3.2	3.96	311.61	10.4
P11279	Lysosome-associated membrane glycoprotein 1	78	SSC*GKENTSDPSLVIAFGR	Hex(6)HexNAc(5)Fuc(2)NeuAc(1)	4595.9	4595.92	4	4.3	5.52	409.18	33.62
P11279	Lysosome-associated membrane glycoprotein 1	78	SSC*GKENTSDPSLVIAFGR	Hex(6)HexNAc(5)Fuc(3)	4450.86	4449.86	4	1.6	2.32	197.79	94.85
P11279	Lysosome-associated membrane glycoprotein 1	78	SSC*GKENTSDPSLVIAFGR	Hex(6)HexNAc(5)NeuAc(1)	4303.78	4304.79	4	2.5	5.81	385.34	23.48
P11279	Lysosome-associated membrane glycoprotein 1	78	SSC*GKENTSDPSLVIAFGR	Hex(6)HexNAc(5)NeuAc(2)	4594.88	4594.87	4	-1.4	3.82	285.7	177.29
P11279	Lysosome-associated membrane glycoprotein 1	78	SSC*GKENTSDPSLVIAFGR	Hex(6)HexNAc(6)Fuc(1)	4361.82	4360.8	3	-3.3	6.46	519.19	288.88
P11279	Lysosome-associated membrane glycoprotein 1	78	SSC*GKENTSDPSLVIAFGR	Hex(6)HexNAc(6)Fuc(1)NeuAc(1)	4652.92	4652.91	3	-0.6	6.45	498.99	98.32
P11279	Lysosome-associated membrane glycoprotein 1	78	SSC*GKENTSDPSLVIAFGR	Hex(6)HexNAc(6)Fuc(1)NeuAc(2)	4944.01	4945.01	3	-1.1	6.53	550.17	51.76
P11279	Lysosome-associated membrane glycoprotein 1	78	SSC*GKENTSDPSLVIAFGR	Hex(6)HexNAc(6)Fuc(2)	4507.88	4508.88	4	0.2	4.93	320.26	209.92
P11279	Lysosome-associated membrane glycoprotein 1	78	SSC*GKENTSDPSLVIAFGR	Hex(6)HexNAc(6)Fuc(2)NeuAc(1)	4798.98	4798.99	4	2.5	5.61	405.47	59.04
P11279	Lysosome-associated membrane glycoprotein 1	78	SSC*GKENTSDPSLVIAFGR	Hex(6)HexNAc(6)Fuc(3)	4653.94	4654.96	4	3.2	2.5	234.3	154.05
P11279	Lysosome-associated membrane glycoprotein 1	78	SSC*GKENTSDPSLVIAFGR	Hex(6)HexNAc(6)Fuc(3)NeuAc(1)	4945.03	4944.04	3	2.1	6.6	452.99	214.93
P11279	Lysosome-associated membrane glycoprotein 1	78	SSC*GKENTSDPSLVIAFGR	Hex(6)HexNAc(6)NeuAc(1)	4506.86	4506.87	3	2.5	5.1	437.34	42.48
P11279	Lysosome-associated membrane glycoprotein 1	78	SSC*GKENTSDPSLVIAFGR	Hex(6)HexNAc(7)Fuc(1)	4564.9	4565.91	3	0.2	3.36	267.59	135.03
P11279	Lysosome-associated membrane glycoprotein 1	78	SSC*GKENTSDPSLVIAFGR	Hex(6)HexNAc(7)Fuc(1)NeuAc(2)	5147.09	5146.08	4	-1.7	5.68	325.71	146.15
P11279	Lysosome-associated membrane glycoprotein 1	78	SSC*GKENTSDPSLVIAFGR	Hex(6)HexNAc(7)Fuc(3)NeuAc(1)	5148.11	5147.1	4	-0.8	2.3	181.05	19.45
P11279	Lysosome-associated membrane glycoprotein 1	78	SSC*GKENTSDPSLVIAFGR	Hex(7)HexNAc(4)Fuc(1)NeuAc(1)	4408.81	4407.83	3	5.1	3.03	310.55	112.65
P11279	Lysosome-associated membrane glycoprotein 1	78	SSC*GKENTSDPSLVIAFGR	Hex(7)HexNAc(7)Fuc(1)	4726.95	4727.94	4	-2.8	2.98	288.13	165
P11279	Lysosome-associated membrane glycoprotein 1	78	SSC*GKENTSDPSLVIAFGR	Hex(7)HexNAc(7)Fuc(1)NeuAc(1)	5018.05	5019.06	4	2.4	2.9	295.98	35.71
P11279	Lysosome-associated membrane glycoprotein 1	78	SSC*GKENTSDPSLVIAFGR	Hex(7)HexNAc(7)Fuc(1)NeuAc(2)	5309.14	5309.14	4	-1.1	4.78	327.7	21.22
P11279	Lysosome-associated membrane glycoprotein 1	78	SSC*GKENTSDPSLVIAFGR	Hex(7)HexNAc(7)Fuc(2)NeuAc(1)	5164.11	5164.13	4	4.4	2.49	260.89	42.6
P11279	Lysosome-associated membrane glycoprotein 1	83	ENTSDPSLVIAFGR	Hex(4)HexNAc(5)Fuc(1)NeuAc(1)	3606.52	3606.54	3	4.5	5.67	378.92	255.37
P11279	Lysosome-associated membrane glycoprotein 1	83	ENTSDPSLVIAFGR	Hex(5)HexNAc(5)Fuc(1)NeuAc(1)	3768.57	3768.59	3	3.9	5.72	418.95	221.85
P11279	Lysosome-associated membrane glycoprotein 1	83	ENTSDPSLVIAFGR	Hex(5)HexNAc(5)Fuc(1)NeuAc(2)	4059.67	4058.66	3	-2.6	3.65	306.13	113.07
P11279	Lysosome-associated membrane glycoprotein 1	83	ENTSDPSLVIAFGR	Hex(5)HexNAc(5)Fuc(3)NeuAc(1)	4060.69	4061.67	3	-4.4	3.06	284.84	92.67
P11279	Lysosome-associated membrane glycoprotein 1	97	GHTLTLNFTR	Hex(10)HexNAc(2)	3186.31	3186.32	3	4.1	2.7	283.84	94.59
P11279	Lysosome-associated membrane glycoprotein 1	97	GHTLTLNFTR	Hex(4)HexNAc(5)NeuAc(1)	3114.33	3114.33	3	0.9	2.92	288.99	89.91
P11279	Lysosome-associated membrane glycoprotein 1	97	GHTLTLNFTR	Hex(4)HexNAc(6)Fuc(2)	3318.43	3318.41	3	-4.1	6.17	507.51	220.41
P11279	Lysosome-associated membrane glycoprotein 1	97	GHTLTLNFTR	Hex(5)HexNAc(2)	2376.04	2376.04	3	-0.2	4.45	245.6	110.62
P11279	Lysosome-associated membrane glycoprotein 1	97	GHTLTLNFTR	Hex(5)HexNAc(3)NeuAc(1)	2870.22	2870.22	3	0.3	6.6	504.91	200.82
P11279	Lysosome-associated membrane glycoprotein 1	97	GHTLTLNFTR	Hex(5)HexNAc(4)	2782.2	2782.2	3	-0.7	6.27	445.9	175.25
P11279	Lysosome-associated membrane glycoprotein 1	97	GHTLTLNFTR	Hex(5)HexNAc(4)NeuAc(1)	3073.3	3073.31	3	2.1	2.91	307.09	79.68
P11279	Lysosome-associated membrane glycoprotein 1	97	GHTLTLNFTR	Hex(5)HexNAc(5)	2985.28	2985.29	3	2.9	5.35	342.31	133.99
P11279	Lysosome-associated membrane glycoprotein 1	97	GHTLTLNFTR	Hex(5)HexNAc(5)Fuc(1)	3131.34	3131.34	3	1.2	2.08	216.99	99.31
P11279	Lysosome-associated membrane glycoprotein 1	97	GHTLTLNFTR	Hex(5)HexNAc(5)NeuAc(1)	3276.38	3276.38	3	1.6	3.12	287.72	84.64
P11279	Lysosome-associated membrane glycoprotein 1	97	GHTLTLNFTR	Hex(6)HexNAc(2)	2538.1	2538.11	3	4.4	5.42	349.5	152.01
P11279	Lysosome-associated membrane glycoprotein 1	97	GHTLTLNFTR	Hex(6)HexNAc(3)	2741.18	2741.17	3	-0.8	8.19	590.73	348.64
P11279	Lysosome-associated membrane glycoprotein 1	97	GHTLTLNFTR	Hex(6)HexNAc(3)NeuAc(1)	3032.27	3032.28	3	1.2	7.07	568.38	327.66
P11279	Lysosome-associated membrane glycoprotein 1	97	GHTLTLNFTR	Hex(6)HexNAc(4)	2944.26	2944.26	3	0.3	6.73	536.43	298.54
P11279	Lysosome-associated membrane glycoprotein 1	97	GHTLTLNFTR	Hex(6)HexNAc(4)Fuc(1)	3090.31	3090.32	3	1.7	2.34	269.72	67.69
P11279	Lysosome-associated membrane glycoprotein 1	97	GHTLTLNFTR	Hex(6)HexNAc(4)NeuAc(1)	3235.35	3235.36	3	2.5	6.19	468.49	197.52
P11279	Lysosome-associated membrane glycoprotein 1	97	GHTLTLNFTR	Hex(6)HexNAc(5)	3147.34	3147.34	3	0.7	6.08	380.67	172.06
P11279	Lysosome-associated membrane glycoprotein 1	97	GHTLTLNFTR	Hex(6)HexNAc(5)Fuc(1)	3293.39	3293.4	3	0.8	2.49	257.09	74.44
P11279	Lysosome-associated membrane glycoprotein 1	97	GHTLTLNFTR	Hex(7)HexNAc(2)	2700.15	2700.15	3	0	6.93	576.37	224.21
P11279	Lysosome-associated membrane glycoprotein 1	97	GHTLTLNFTR	Hex(7)HexNAc(4)	3106.31	3106.31	3	0.5	6.73	527.36	276.74
P11279	Lysosome-associated membrane glycoprotein 1	97	GHTLTLNFTR	Hex(7)HexNAc(4)Fuc(1)	3252.37	3252.37	3	1.5	2.44	221.89	64.49
P11279	Lysosome-associated membrane glycoprotein 1	97	GHTLTLNFTR	Hex(7)HexNAc(4)NeuAc(1)	3397.4	3397.42	3	3.7	5.26	328.86	139.27
P11279	Lysosome-associated membrane glycoprotein 1	97	GHTLTLNFTR	Hex(7)HexNAc(5)	3309.39	3309.39	3	0.6	5.62	344.9	129.38
P11279	Lysosome-associated membrane glycoprotein 1	97	GHTLTLNFTR	Hex(9)HexNAc(2)	3024.26	3024.26	3	0.1	6.54	482.83	203
P11279	Lysosome-associated membrane glycoprotein 1	247	KDNTTVTR	Hex(4)HexNAc(3)Fuc(1)NeuAc(1)	2629.1	2629.1	3	0.4	5.53	392.54	111.79
P11279	Lysosome-associated membrane glycoprotein 1	247	KDNTTVTR	Hex(4)HexNAc(4)Fuc(1)	2541.08	2541.09	3	2	3.09	299.36	44.68
P11279	Lysosome-associated membrane glycoprotein 1	247	KDNTTVTR	Hex(4)HexNAc(4)Fuc(1)NeuAc(1)	2832.18	2832.18	3	1.6	4.81	357.84	79.67
P11279	Lysosome-associated membrane glycoprotein 1	247	KDNTTVTR	Hex(4)HexNAc(5)Fuc(1)	2744.16	2744.16	3	0.6	5.43	367.28	92.47
P11279	Lysosome-associated membrane glycoprotein 1	247	KDNTTVTR	Hex(4)HexNAc(5)Fuc(1)NeuAc(1)	3035.26	3035.26	3	0.2	5.3	344.25	88.31
P11279	Lysosome-associated membrane glycoprotein 1	247	KDNTTVTR	Hex(5)HexNAc(4)Fuc(1)NeuAc(1)	2994.23	2994.23	3	0.8	5.03	380.46	70.6
P11279	Lysosome-associated membrane glycoprotein 1	247	KDNTTVTR	Hex(5)HexNAc(4)Fuc(1)NeuAc(2)	3285.33	3285.33	3	1.5	3.68	317.48	48.49
P11279	Lysosome-associated membrane glycoprotein 1	247	KDNTTVTR	Hex(5)HexNAc(5)Fuc(1)	2906.21	2906.22	3	0.6	5.47	383.02	90.13
P11279	Lysosome-associated membrane glycoprotein 1	247	KDNTTVTR	Hex(5)HexNAc(5)Fuc(1)NeuAc(1)	3197.31	3197.31	3	1.1	5.34	350.32	87.64
P11279	Lysosome-associated membrane glycoprotein 1	247	KDNTTVTR	Hex(5)HexNAc(5)Fuc(1)NeuAc(2)	3488.41	3488.41	3	1.4	4.84	356.96	69.96
P11279	Lysosome-associated membrane glycoprotein 1	247	KDNTTVTR	Hex(6)HexNAc(6)Fuc(1)	3271.35	3271.35	3	1.3	3.68	301.69	50.79
P11279	Lysosome-associated membrane glycoprotein 1	247	KDNTTVTR	Hex(6)HexNAc(6)Fuc(1)NeuAc(1)	3562.44	3562.45	3	3.2	5.04	354.35	84.75
P11279	Lysosome-associated membrane glycoprotein 1	247	KDNTTVTR	Hex(6)HexNAc(6)Fuc(2)	3417.4	3417.4	3	-2.3	3.33	323.6	47
P11279	Lysosome-associated membrane glycoprotein 1	248	DNTTVTR	Hex(4)HexNAc(4)Fuc(1)NeuAc(1)	2704.08	2704.09	3	1.4	2.55	261.69	33.43
P11279	Lysosome-associated membrane glycoprotein 1	248	DNTTVTR	Hex(5)HexNAc(5)Fuc(1)NeuAc(1)	3069.21	3069.22	3	1.5	2.92	267.47	55.82
P11279	Lysosome-associated membrane glycoprotein 1	248	DNTTVTR	Hex(5)HexNAc(5)Fuc(1)NeuAc(2)	3360.31	3360.31	3	0.3	2.33	238.07	35.78
P11279	Lysosome-associated membrane glycoprotein 1	248	DNTTVTR	Hex(9)HexNAc(2)	2671.03	2671.05	2	4.2	4.57	281.67	119.69
P11279	Lysosome-associated membrane glycoprotein 1	255	LLNINPNK	Hex(3)HexNAc(5)Fuc(1)	2573.16	2573.17	3	2.5	4.95	321.44	84.86
P11279	Lysosome-associated membrane glycoprotein 1	255	LLNINPNK	Hex(4)HexNAc(3)Fuc(1)	2329.05	2329.06	3	3.3	2.19	208.08	89.49
P11279	Lysosome-associated membrane glycoprotein 1	255	LLNINPNK	Hex(4)HexNAc(3)Fuc(1)NeuAc(1)	2620.15	2620.15	3	-1	5.69	508.09	93
P11279	Lysosome-associated membrane glycoprotein 1	255	LLNINPNK	Hex(4)HexNAc(4)Fuc(1)	2532.13	2532.13	3	-0.4	5.6	448.38	89.47
P11279	Lysosome-associated membrane glycoprotein 1	255	LLNINPNK	Hex(4)HexNAc(5)Fuc(1)	2735.21	2735.22	2	2.9	5.24	418.28	112.46
P11279	Lysosome-associated membrane glycoprotein 1	255	LLNINPNK	Hex(4)HexNAc(5)Fuc(4)NeuAc(1)	3464.48	3464.47	2	-3.3	4.04	355.4	121.91
P11279	Lysosome-associated membrane glycoprotein 1	255	LLNINPNK	Hex(4)HexNAc(6)Fuc(1)	2938.29	2938.3	3	3.4	2.4	255.43	82.1
P11279	Lysosome-associated membrane glycoprotein 1	255	LLNINPNK	Hex(5)HexNAc(2)	2141.97	2141.97	2	1.4	5.51	388.68	113.69
P11279	Lysosome-associated membrane glycoprotein 1	255	LLNINPNK	Hex(5)HexNAc(3)Fuc(1)NeuAc(1)	2782.2	2782.2	3	0.8	6.09	519.35	123.97
P11279	Lysosome-associated membrane glycoprotein 1	255	LLNINPNK	Hex(5)HexNAc(3)NeuAc(1)	2636.14	2636.14	3	-1.7	5.25	368.91	101.59
P11279	Lysosome-associated membrane glycoprotein 1	255	LLNINPNK	Hex(5)HexNAc(4)	2548.13	2548.14	2	4.1	4.66	425.58	112.26
P11279	Lysosome-associated membrane glycoprotein 1	255	LLNINPNK	Hex(5)HexNAc(4)Fuc(1)	2694.19	2694.18	3	-0.6	5.72	485.07	101.76
P11279	Lysosome-associated membrane glycoprotein 1	255	LLNINPNK	Hex(5)HexNAc(4)Fuc(1)NeuAc(1)	2985.28	2985.28	3	-0.7	4.17	312.55	156.8
P11279	Lysosome-associated membrane glycoprotein 1	255	LLNINPNK	Hex(5)HexNAc(5)	2751.21	2751.21	3	1.2	2.13	183.88	64.6
P11279	Lysosome-associated membrane glycoprotein 1	255	LLNINPNK	Hex(5)HexNAc(5)Fuc(1)	2897.27	2897.28	2	3.7	5.46	452.95	108.13
P11279	Lysosome-associated membrane glycoprotein 1	255	LLNINPNK	Hex(5)HexNAc(5)Fuc(1)NeuAc(1)	3188.36	3188.36	3	0.3	5.43	386.26	102.08
P11279	Lysosome-associated membrane glycoprotein 1	255	LLNINPNK	Hex(5)HexNAc(5)Fuc(3)	3189.38	3189.38	3	0.8	3.06	281.9	97.01
P11279	Lysosome-associated membrane glycoprotein 1	255	LLNINPNK	Hex(5)HexNAc(5)Fuc(4)NeuAc(2)	3917.63	3917.64	3	1.7	2.89	292.87	109.74
P11279	Lysosome-associated membrane glycoprotein 1	255	LLNINPNK	Hex(5)HexNAc(6)Fuc(1)	3100.34	3100.34	3	-0.1	5.38	370.86	101.17
P11279	Lysosome-associated membrane glycoprotein 1	255	LLNINPNK	Hex(6)HexNAc(2)	2304.02	2304.02	2	-0.2	3.5	332.83	94.88
P11279	Lysosome-associated membrane glycoprotein 1	255	LLNINPNK	Hex(6)HexNAc(3)	2507.1	2507.1	3	0.5	6	556.64	109.4
P11279	Lysosome-associated membrane glycoprotein 1	255	LLNINPNK	Hex(6)HexNAc(3)Fuc(1)	2653.16	2653.15	2	-1.8	5.24	357.74	110.01
P11279	Lysosome-associated membrane glycoprotein 1	255	LLNINPNK	Hex(6)HexNAc(3)Fuc(1)NeuAc(1)	2944.25	2944.26	2	0.7	5.74	436.18	100.57
P11279	Lysosome-associated membrane glycoprotein 1	255	LLNINPNK	Hex(6)HexNAc(3)NeuAc(1)	2798.2	2798.2	2	0.4	5.91	494.81	103.83
P11279	Lysosome-associated membrane glycoprotein 1	255	LLNINPNK	Hex(6)HexNAc(4)	2710.18	2710.19	3	2.5	5.81	484.14	123.93
P11279	Lysosome-associated membrane glycoprotein 1	255	LLNINPNK	Hex(6)HexNAc(4)Fuc(1)	2856.24	2856.24	3	1.6	5.73	472.48	109.84
P11279	Lysosome-associated membrane glycoprotein 1	255	LLNINPNK	Hex(6)HexNAc(4)Fuc(1)NeuAc(1)	3147.33	3147.35	3	3.8	5.04	329.58	132.49
P11279	Lysosome-associated membrane glycoprotein 1	255	LLNINPNK	Hex(6)HexNAc(5)Fuc(1)	3059.32	3059.33	3	3.4	4.96	329.38	110.58
P11279	Lysosome-associated membrane glycoprotein 1	255	LLNINPNK	Hex(6)HexNAc(6)Fuc(1)	3262.4	3262.41	2	2.6	5.92	491.55	133.08
P11279	Lysosome-associated membrane glycoprotein 1	255	LLNINPNK	Hex(6)HexNAc(6)Fuc(1)NeuAc(1)	3553.49	3553.51	3	4.6	4.71	338.85	98.5
P11279	Lysosome-associated membrane glycoprotein 1	255	LLNINPNK	Hex(6)HexNAc(6)Fuc(2)	3408.46	3408.46	3	2	3.65	316.13	110.03
P11279	Lysosome-associated membrane glycoprotein 1	255	LLNINPNK	Hex(6)HexNAc(6)Fuc(2)NeuAc(1)	3699.55	3699.56	3	3.6	2.34	249.24	113.98
P11279	Lysosome-associated membrane glycoprotein 1	255	LLNINPNK	Hex(6)HexNAc(6)NeuAc(2)	3698.53	3698.53	3	0.4	3.16	287.17	123.15
P11279	Lysosome-associated membrane glycoprotein 1	255	LLNINPNK	Hex(6)HexNAc(7)Fuc(1)	3465.48	3465.48	3	-0.2	2.69	250.23	147.22
P11279	Lysosome-associated membrane glycoprotein 1	255	LLNINPNK	Hex(7)HexNAc(2)	2466.07	2466.08	2	0.4	6.61	541.87	160.72
P11279	Lysosome-associated membrane glycoprotein 1	255	LLNINPNK	Hex(7)HexNAc(4)	2872.23	2872.24	3	1.2	5.46	380.38	112.65
P11279	Lysosome-associated membrane glycoprotein 1	255	LLNINPNK	Hex(7)HexNAc(4)Fuc(1)	3018.29	3018.28	3	-4.9	3.9	291.69	108.45
P11279	Lysosome-associated membrane glycoprotein 1	255	LLNINPNK	Hex(7)HexNAc(5)Fuc(1)	3221.37	3221.38	3	3.5	4.58	282.43	104.45
P11279	Lysosome-associated membrane glycoprotein 1	255	LLNINPNK	Hex(7)HexNAc(6)	3278.39	3278.4	3	0.9	2	191.85	132.17
P11279	Lysosome-associated membrane glycoprotein 1	255	LLNINPNK	Hex(7)HexNAc(6)Fuc(1)	3424.45	3424.44	2	-2.8	5.38	425.42	115.31
P11279	Lysosome-associated membrane glycoprotein 1	255	LLNINPNK	Hex(7)HexNAc(6)Fuc(1)NeuAc(1)	3715.55	3715.55	3	0.2	5.22	324.32	103.54
P11279	Lysosome-associated membrane glycoprotein 1	255	LLNINPNK	Hex(7)HexNAc(6)Fuc(1)NeuAc(2)	4006.64	4007.64	3	0.1	2.14	200.3	16.43
P11279	Lysosome-associated membrane glycoprotein 1	255	LLNINPNK	Hex(7)HexNAc(6)Fuc(2)NeuAc(1)	3861.6	3861.61	3	1.5	5.16	306.05	131.26
P11279	Lysosome-associated membrane glycoprotein 1	255	LLNINPNK	Hex(7)HexNAc(7)Fuc(1)	3627.53	3627.54	2	3.6	5.64	486.18	109.87
P11279	Lysosome-associated membrane glycoprotein 1	255	LLNINPNK	Hex(7)HexNAc(7)Fuc(2)	3773.59	3773.6	2	4.4	3.85	369.23	138.21
P11279	Lysosome-associated membrane glycoprotein 1	255	LLNINPNK	Hex(8)HexNAc(2)	2628.13	2628.13	2	-1	5.83	448.75	127.24
P11279	Lysosome-associated membrane glycoprotein 1	255	LLNINPNK	Hex(9)HexNAc(2)	2790.18	2790.19	2	3.3	5.16	360.06	99.63
P11279	Lysosome-associated membrane glycoprotein 1	320	AANGSLR	Hex(8)HexNAc(2)	2390.95	2390.95	3	-1.4	3.9	382.07	53.35
P11279	Lysosome-associated membrane glycoprotein 1	320	AANGSLR	Hex(9)HexNAc(2)	2553.01	2553.01	3	0	3.84	326.25	49.89
P11279	Lysosome-associated membrane glycoprotein 1	320	AANGSLR	Hex(10)HexNAc(2)	2715.06	2715.06	2	0.4	2.69	265.14	26.95
P11717	Cation-independent mannose-6-phosphate receptor	2123	AAC*AVKPQEVQMVNGTITNPIN+GK	Hex(5)HexNAc(5)Fuc(1)NeuAc(2)	5095.19	5094.19	4	-0.1	2.18	171.78	59.89
P11717	Cation-independent mannose-6-phosphate receptor	2123	AAC*AVKPxQEVQMVNGTITNPINGK	Hex(5)HexNAc(5)Fuc(1)NeuAc(1)	4819.11	4819.12	4	3.8	2.62	251.41	18.32
P11717	Cation-independent mannose-6-phosphate receptor	734	DAGVGFPEYQ+EEDNSTYNFR	Hex(9)HexNAc(2)	4203.61	4202.6	3	-1.1	8.44	544.64	164.11
P11717	Cation-independent mannose-6-phosphate receptor	734	DAGVGFPEYQEEDNSTYNFR	Hex(4)HexNAc(4)Fuc(1)	3944.58	3944.58	3	1.6	6.97	512.7	309.38
P11717	Cation-independent mannose-6-phosphate receptor	734	DAGVGFPEYQEEDNSTYNFR	Hex(4)HexNAc(5)Fuc(1)	4147.66	4147.66	3	0.2	7.41	576.21	268.77
P11717	Cation-independent mannose-6-phosphate receptor	734	DAGVGFPEYQEEDNSTYNFR	Hex(5)HexNAc(5)Fuc(1)	4309.71	4308.72	3	2.8	9.63	584.48	341.71
P11717	Cation-independent mannose-6-phosphate receptor	734	DAGVGFPEYQEEDNSTYNFR	Hex(5)HexNAc(5)Fuc(1)NeuAc(1)	4600.8	4600.81	3	0.6	8.71	598.43	65.23
P11717	Cation-independent mannose-6-phosphate receptor	734	DAGVGFPEYQEEDNSTYNFR	Hex(8)HexNAc(2)	4040.57	4041.57	3	-2.2	8.19	560.93	109.9
P11717	Cation-independent mannose-6-phosphate receptor	734	DAGVGFPEYQEEDNSTYNFR	Hex(9)HexNAc(2)	4202.62	4202.62	3	0.2	13.61	760.82	264.98
P11717	Cation-independent mannose-6-phosphate receptor	1755	HFNYTSLIAFHC*K	Hex(5)HexNAc(5)NeuAc(2)	4045.64	4045.64	4	-0.2	4.74	245.98	35.03
P11717	Cation-independent mannose-6-phosphate receptor	578	IKTNITLVC*KPGDLESAPVLR	Hex(8)HexNAc(2)	4026.88	4026.88	4	0.1	13.31	763.03	571.3
P11717	Cation-independent mannose-6-phosphate receptor	578	IKTNITLVC*KPGDLESAPVLR	Hex(9)HexNAc(2)	4188.93	4187.95	4	4.1	6.34	454.83	273.23
P11717	Cation-independent mannose-6-phosphate receptor	1311	MNFTGGDTC*HK	Hex(7)HexNAc(2)	2808.05	2808.06	3	4.3	5.38	338.62	159.68
P11717	Cation-independent mannose-6-phosphate receptor	1311	MNFTGGDTC*HK	Hex(8)HexNAc(2)	2970.1	2970.1	3	-1	6.74	501.78	328.24
P11717	Cation-independent mannose-6-phosphate receptor	1311	MNFTGGDTC*HK	Hex(9)HexNAc(2)	3132.15	3132.15	3	-0.7	6.74	519.97	328.14
P11717	Cation-independent mannose-6-phosphate receptor	1311	MNFTGGDTC*HK	Hex(10)HexNAc(2)	3294.21	3294.21	3	0.8	6.09	374.57	165.19
P11717	Cation-independent mannose-6-phosphate receptor	427	MSVINFEC*NK	Hex(9)HexNAc(2)	3106.2	3106.19	3	-3.4	2.27	260.34	94.83
P11717	Cation-independent mannose-6-phosphate receptor	1656	NGSSIVDLSPLIHR	Hex(4)HexNAc(5)Fuc(1)	3317.49	3317.49	3	0.7	2.98	313.83	21.99
P11717	Cation-independent mannose-6-phosphate receptor	1656	NGSSIVDLSPLIHR	Hex(4)HexNAc(5)Fuc(1)NeuAc(1)	3608.58	3608.59	3	0.4	5.2	335.59	162.63
P11717	Cation-independent mannose-6-phosphate receptor	1656	NGSSIVDLSPLIHR	Hex(4)HexNAc(5)Fuc(2)	3463.55	3463.55	3	1.3	2.32	283.57	21.44
P11717	Cation-independent mannose-6-phosphate receptor	1656	NGSSIVDLSPLIHR	Hex(5)HexNAc(5)Fuc(1)NeuAc(1)	3770.64	3770.64	3	-0.1	3.04	302.53	62.51
P11717	Cation-independent mannose-6-phosphate receptor	1656	NGSSIVDLSPLIHR	Hex(6)HexNAc(4)	3292.46	3292.45	3	-1	5.25	347.05	85.88
P11717	Cation-independent mannose-6-phosphate receptor	1656	NGSSIVDLSPLIHR	Hex(8)HexNAc(2)	3210.4	3210.41	3	2	6.55	469.37	226.18
P11717	Cation-independent mannose-6-phosphate receptor	1656	NGSSIVDLSPLIHR	Hex(9)HexNAc(2)	3372.46	3372.46	3	0.4	9.29	625.55	344.26
P11717	Cation-independent mannose-6-phosphate receptor	1656	NGSSIVDLSPLIHR	Hex(10)HexNAc(2)	3534.51	3534.52	3	2.5	5.89	392.87	185.72
P11717	Cation-independent mannose-6-phosphate receptor	107	SLLEFNTTVSC*DQQGTNHR	Hex(4)HexNAc(5)Fuc(1)	4016.68	4016.7	3	3.7	9.46	589.1	400.01
P11717	Cation-independent mannose-6-phosphate receptor	107	SLLEFNTTVSC*DQQGTNHR	Hex(4)HexNAc(5)Fuc(1)NeuAc(1)	4307.78	4306.79	3	4.6	9.43	629.28	347.32
P11717	Cation-independent mannose-6-phosphate receptor	107	SLLEFNTTVSC*DQQGTNHR	Hex(5)HexNAc(5)Fuc(1)	4178.73	4178.74	3	2.7	5.81	473.88	279.42
P11717	Cation-independent mannose-6-phosphate receptor	107	SLLEFNTTVSC*DQQGTNHR	Hex(5)HexNAc(5)Fuc(1)NeuAc(1)	4469.83	4469.83	3	-0.4	6.01	380.36	83.85
P11717	Cation-independent mannose-6-phosphate receptor	107	SLLEFNTTVSC*DQQGTNHR	Hex(8)HexNAc(2)	3909.6	3909.61	3	4.9	9.27	589.8	406.61
P11717	Cation-independent mannose-6-phosphate receptor	107	SLLEFNTTVSC*DQQGTNHR	Hex(9)HexNAc(2)	4071.65	4071.65	3	-0.8	13.64	786.73	453.7
P11717	Cation-independent mannose-6-phosphate receptor	855	TGPVVEDSGSLLLEYVNGSAC*TTSDGR	Hex(5)HexNAc(4)Fuc(1)NeuAc(2)	5135.13	5134.12	4	-0.8	6.54	343.94	200.56
P11717	Cation-independent mannose-6-phosphate receptor	855	TGPVVEDSGSLLLEYVNGSAC*TTSDGR	Hex(5)HexNAc(5)Fuc(1)NeuAc(1)	5047.11	5046.11	4	0.2	7.97	577.09	362.64
P11717	Cation-independent mannose-6-phosphate receptor	855	TGPVVEDSGSLLLEYVNGSAC*TTSDGR	Hex(6)HexNAc(5)Fuc(2)NeuAc(1)	5355.22	5355.24	4	2.7	6.32	373.94	31.18
P11717	Cation-independent mannose-6-phosphate receptor	855	TGPVVEDSGSLLLEYVNGSAC*TTSDGR	Hex(9)HexNAc(2)	4648.93	4648.92	3	-3.9	7.76	502.32	318.9
P11717	Cation-independent mannose-6-phosphate receptor	580	TNITLVC*KPGDLESAPVLR	Hex(6)HexNAc(2)	3461.6	3461.6	3	1	12.76	726.93	541.78
P11717	Cation-independent mannose-6-phosphate receptor	580	TNITLVC*KPGDLESAPVLR	Hex(7)HexNAc(2)	3623.65	3623.66	3	2.2	14.54	824.25	534.68
P11717	Cation-independent mannose-6-phosphate receptor	580	TNITLVC*KPGDLESAPVLR	Hex(8)HexNAc(2)	3785.7	3785.71	3	2.6	15.54	886.49	615.5
P11717	Cation-independent mannose-6-phosphate receptor	580	TNITLVC*KPGDLESAPVLR	Hex(9)HexNAc(2)	3947.76	3947.76	3	1.7	15.67	854.17	596.54
P11717	Cation-independent mannose-6-phosphate receptor	580	TNITLVC*KPGDLESAPVLR	Hex(10)HexNAc(2)	4109.81	4109.82	3	2.3	7	520.59	338.74
P11717	Cation-independent mannose-6-phosphate receptor	398	YHNQTLR	Hex(7)HexNAc(2)	2472	2472.01	3	2.2	6.17	452.43	163.68
P11717	Cation-independent mannose-6-phosphate receptor	398	YHNQTLR	Hex(8)HexNAc(2)	2634.06	2634.06	3	0.3	5.72	399.18	129.47
P11717	Cation-independent mannose-6-phosphate receptor	398	YHNQTLR	Hex(9)HexNAc(2)	2796.11	2796.11	3	1	6.51	459.13	207.53
P11717	Cation-independent mannose-6-phosphate receptor	398	YHNQTLR	Hex(10)HexNAc(2)	2958.16	2958.17	3	1.7	5.79	353.54	144.84
P13473	Lysosome-associated membrane glycoprotein 2	46	WQMNFTVR	Hex(5)HexNAc(5)NeuAc(1)	3198.28	3198.28	3	-0.3	3.9	285.53	64.68
P13473	Lysosome-associated membrane glycoprotein 2	46	WQMNFTVR	Hex(6)HexNAc(6)	3272.32	3272.32	3	0.6	2.56	246.63	66.75
P13473	Lysosome-associated membrane glycoprotein 2	54	YETTNK	Hex(4)HexNAc(4)Fuc(1)NeuAc(1)	2653.04	2653.03	2	-2.2	3.06	329.08	84.48
P13473	Lysosome-associated membrane glycoprotein 2	248	VASVININPNTTHSTGSC*R	Hex(3)HexNAc(2)Fuc(1)	3066.37	3066.36	3	-1.7	5.78	508.9	319.5
P13473	Lysosome-associated membrane glycoprotein 2	248	VASVININPNTTHSTGSC*R	Hex(4)HexNAc(4)Fuc(1)	3634.58	3634.59	3	3.1	4.28	315.72	142.29
P13473	Lysosome-associated membrane glycoprotein 2	248	VASVININPNTTHSTGSC*R	Hex(4)HexNAc(5)Fuc(4)NeuAc(1)	4566.93	4567.93	3	-1.3	7.1	563.8	28.95
P13473	Lysosome-associated membrane glycoprotein 2	248	VASVININPNTTHSTGSC*R	Hex(4)HexNAc(6)Fuc(1)	4040.74	4040.75	3	3.9	5.65	445.09	234.1
P13473	Lysosome-associated membrane glycoprotein 2	248	VASVININPNTTHSTGSC*R	Hex(5)HexNAc(5)Fuc(1)	3999.71	3999.71	3	-1.5	4.88	404.23	141.05
P13473	Lysosome-associated membrane glycoprotein 2	248	VASVININPNTTHSTGSC*R	Hex(5)HexNAc(5)Fuc(1)NeuAc(1)	4290.81	4289.82	3	4.7	5.34	403.46	203.9
P13473	Lysosome-associated membrane glycoprotein 2	248	VASVININPNTTHSTGSC*R	Hex(5)HexNAc(5)Fuc(4)NeuAc(1)	4728.98	4729.98	4	-0.2	7.1	544.36	25.65
P13473	Lysosome-associated membrane glycoprotein 2	248	VASVININPNTTHSTGSC*R	Hex(5)HexNAc(6)Fuc(1)	4202.79	4202.79	3	0.5	11.72	683.56	235.03
P13473	Lysosome-associated membrane glycoprotein 2	248	VASVININPNTTHSTGSC*R	Hex(5)HexNAc(6)Fuc(1)NeuAc(1)	4493.89	4493.89	3	-0.1	6.44	434.04	91.51
P13473	Lysosome-associated membrane glycoprotein 2	248	VASVININPNTTHSTGSC*R	Hex(5)HexNAc(6)Fuc(2)	4348.85	4348.85	4	-0.9	5.18	390.1	41.57
P13473	Lysosome-associated membrane glycoprotein 2	248	VASVININPNTTHSTGSC*R	Hex(5)HexNAc(6)NeuAc(1)	4347.83	4348.84	3	0.8	7.33	569.9	49.5
P13473	Lysosome-associated membrane glycoprotein 2	248	VASVININPNTTHSTGSC*R	Hex(5)HexNAc(7)Fuc(1)	4405.87	4405.88	3	2.5	6.49	426.72	212.57
P13473	Lysosome-associated membrane glycoprotein 2	248	VASVININPNTTHSTGSC*R	Hex(6)HexNAc(4)Fuc(1)NeuAc(2)	4540.88	4539.88	4	2.4	5.37	306.73	206.04
P13473	Lysosome-associated membrane glycoprotein 2	248	VASVININPNTTHSTGSC*R	Hex(6)HexNAc(5)Fuc(1)	4161.76	4162.76	3	-2.3	6.55	469.42	219.89
P13473	Lysosome-associated membrane glycoprotein 2	248	VASVININPNTTHSTGSC*R	Hex(6)HexNAc(5)Fuc(1)NeuAc(1)	4452.86	4451.88	3	5.2	8.29	587.27	278.41
P13473	Lysosome-associated membrane glycoprotein 2	248	VASVININPNTTHSTGSC*R	Hex(6)HexNAc(5)Fuc(1)NeuAc(2)	4743.96	4743.96	3	0.2	6.84	472.69	47.3
P13473	Lysosome-associated membrane glycoprotein 2	248	VASVININPNTTHSTGSC*R	Hex(6)HexNAc(5)Fuc(2)NeuAc(1)	4598.92	4598.93	3	1.8	6.95	502.32	90.08
P13473	Lysosome-associated membrane glycoprotein 2	248	VASVININPNTTHSTGSC*R	Hex(6)HexNAc(5)Fuc(3)NeuAc(1)	4744.98	4743.99	3	3.2	7.26	549.31	292.14
P13473	Lysosome-associated membrane glycoprotein 2	248	VASVININPNTTHSTGSC*R	Hex(6)HexNAc(5)NeuAc(2)	4597.9	4597.88	3	-2.9	6.34	433.06	119.59
P13473	Lysosome-associated membrane glycoprotein 2	248	VASVININPNTTHSTGSC*R	Hex(6)HexNAc(6)Fuc(1)	4364.84	4364.85	3	1.1	11.7	665.98	298.29
P13473	Lysosome-associated membrane glycoprotein 2	248	VASVININPNTTHSTGSC*R	Hex(6)HexNAc(6)Fuc(1)NeuAc(1)	4655.94	4655.94	3	0	11.78	701.76	129.08
P13473	Lysosome-associated membrane glycoprotein 2	248	VASVININPNTTHSTGSC*R	Hex(6)HexNAc(6)Fuc(1)NeuAc(2)	4947.03	4947.04	4	1	9.52	610.91	25.54
P13473	Lysosome-associated membrane glycoprotein 2	248	VASVININPNTTHSTGSC*R	Hex(6)HexNAc(6)Fuc(1)NeuAc(3)	5238.13	5237.14	4	2.7	5.66	367.89	181.28
P13473	Lysosome-associated membrane glycoprotein 2	248	VASVININPNTTHSTGSC*R	Hex(6)HexNAc(6)Fuc(2)	4510.9	4510.91	4	1.8	9.44	604.97	342.5
P13473	Lysosome-associated membrane glycoprotein 2	248	VASVININPNTTHSTGSC*R	Hex(6)HexNAc(6)Fuc(2)NeuAc(1)	4802	4802	4	0.8	8.71	582.86	32.92
P13473	Lysosome-associated membrane glycoprotein 2	248	VASVININPNTTHSTGSC*R	Hex(6)HexNAc(6)Fuc(3)	4656.96	4657.95	3	-3.8	5.92	355.46	137.21
P13473	Lysosome-associated membrane glycoprotein 2	248	VASVININPNTTHSTGSC*R	Hex(6)HexNAc(6)Fuc(4)	4803.02	4804	3	-3.5	6.42	451.1	104.31
P13473	Lysosome-associated membrane glycoprotein 2	248	VASVININPNTTHSTGSC*R	Hex(6)HexNAc(6)Fuc(4)NeuAc(1)	5094.11	5095.11	4	-0.4	3.95	273.12	135.71
P13473	Lysosome-associated membrane glycoprotein 2	248	VASVININPNTTHSTGSC*R	Hex(6)HexNAc(6)NeuAc(1)	4509.88	4509.9	3	4.6	6.7	511.81	15.55
P13473	Lysosome-associated membrane glycoprotein 2	248	VASVININPNTTHSTGSC*R	Hex(6)HexNAc(6)NeuAc(2)	4800.98	4801.97	4	-1.4	5.16	282.39	13.4
P13473	Lysosome-associated membrane glycoprotein 2	248	VASVININPNTTHSTGSC*R	Hex(6)HexNAc(7)Fuc(1)	4567.92	4568.91	3	-4.6	4.77	276.13	125.6
P13473	Lysosome-associated membrane glycoprotein 2	248	VASVININPNTTHSTGSC*R	Hex(6)HexNAc(7)Fuc(2)	4713.98	4712.97	4	-1.2	5.67	294.96	34.85
P13473	Lysosome-associated membrane glycoprotein 2	248	VASVININPNTTHSTGSC*R	Hex(7)HexNAc(6)Fuc(1)	4526.9	4526.9	4	1	6.67	437.41	222.05
P13473	Lysosome-associated membrane glycoprotein 2	248	VASVININPNTTHSTGSC*R	Hex(7)HexNAc(6)Fuc(1)NeuAc(1)	4817.99	4817.98	3	-3.1	6.91	577.48	168.08
P13473	Lysosome-associated membrane glycoprotein 2	248	VASVININPNTTHSTGSC*R	Hex(7)HexNAc(6)Fuc(1)NeuAc(2)	5109.09	5109.1	4	1.8	6.34	381.8	29.06
P13473	Lysosome-associated membrane glycoprotein 2	248	VASVININPNTTHSTGSC*R	Hex(7)HexNAc(6)Fuc(2)	4672.95	4673.96	4	0.3	4	273.66	182.78
P13473	Lysosome-associated membrane glycoprotein 2	248	VASVININPNTTHSTGSC*R	Hex(7)HexNAc(6)Fuc(2)NeuAc(1)	4964.05	4964.05	3	0.2	6.9	479.15	51.47
P13473	Lysosome-associated membrane glycoprotein 2	248	VASVININPNTTHSTGSC*R	Hex(7)HexNAc(6)Fuc(3)	4819.01	4820.01	3	-2.1	6.14	395.51	208.29
P13473	Lysosome-associated membrane glycoprotein 2	248	VASVININPNTTHSTGSC*R	Hex(7)HexNAc(6)Fuc(5)	5111.13	5112.15	3	2.7	5.43	279.48	198.93
P13473	Lysosome-associated membrane glycoprotein 2	248	VASVININPNTTHSTGSC*R	Hex(7)HexNAc(7)Fuc(1)	4729.98	4731	3	3.4	4.82	246.28	122.22
P13473	Lysosome-associated membrane glycoprotein 2	248	VASVININPNTTHSTGSC*R	Hex(7)HexNAc(7)Fuc(1)NeuAc(1)	5021.07	5021.05	4	-3.8	5.7	411.48	169.48
P13473	Lysosome-associated membrane glycoprotein 2	248	VASVININPNTTHSTGSC*R	Hex(7)HexNAc(7)Fuc(2)	4876.03	4876.04	4	0.6	6.77	463.54	21.82
P13473	Lysosome-associated membrane glycoprotein 2	248	VASVININPNTTHSTGSC*R	Hex(8)HexNAc(2)	3730.57	3730.56	3	-5	6.7	529.71	248.49
P13473	Lysosome-associated membrane glycoprotein 2	248	VASVININPNTTHSTGSC*R	Hex(9)HexNAc(2)	3892.63	3892.64	3	2.6	11.54	677.8	292.82
P13473	Lysosome-associated membrane glycoprotein 2	248	VASVININPNTTHSTGSC*R	Hex(10)HexNAc(2)	4054.68	4055.67	3	-4.3	2.7	252.44	83.38
P13473	Lysosome-associated membrane glycoprotein 2	274	LNSSTIK	Hex(5)HexNAc(4)NeuAc(1)	2676.11	2676.11	3	0.1	2.79	291.71	32.33
P13473	Lysosome-associated membrane glycoprotein 2	274	LNSSTIK	Hex(5)HexNAc(5)	2588.1	2588.11	2	4.7	3.72	367.35	46.15
P13473	Lysosome-associated membrane glycoprotein 2	274	LNSSTIK	Hex(5)HexNAc(5)Fuc(1)NeuAc(1)	3025.25	3025.26	3	1.8	2.71	289.76	33.58
P13473	Lysosome-associated membrane glycoprotein 2	274	LNSSTIK	Hex(5)HexNAc(5)Fuc(4)NeuAc(2)	3754.52	3754.52	3	0.8	2.18	227.95	17.16
P13473	Lysosome-associated membrane glycoprotein 2	274	LNSSTIK	Hex(5)HexNAc(5)NeuAc(1)	2879.19	2879.19	2	-0.1	4.72	420.7	43.34
P13473	Lysosome-associated membrane glycoprotein 2	274	LNSSTIK	Hex(6)HexNAc(6)Fuc(1)NeuAc(1)	3390.38	3390.39	3	1	2.18	220.18	10.39
P13473	Lysosome-associated membrane glycoprotein 2	274	LNSSTIK	Hex(6)HexNAc(6)Fuc(4)NeuAc(2)	4119.65	4120.65	3	-1.4	2.49	263.25	39.85
P13473	Lysosome-associated membrane glycoprotein 2	274	LNSSTIK	Hex(6)HexNAc(6)Fuc(5)NeuAc(1)	3974.61	3974.61	3	-0.6	2	210.34	40.69
P13473	Lysosome-associated membrane glycoprotein 2	274	LNSSTIK	Hex(6)HexNAc(6)NeuAc(1)	3244.32	3244.32	3	-0.1	2.16	234.86	18.67
P13473	Lysosome-associated membrane glycoprotein 2	274	LNSSTIK	Hex(6)HexNAc(7)NeuAc(1)	3447.4	3447.41	3	2.4	2.27	230.52	34.17
P13473	Lysosome-associated membrane glycoprotein 2	274	LNSSTIK	Hex(7)HexNAc(6)NeuAc(1)	3406.38	3406.38	3	-0.2	2.32	276.18	11.22
P13473	Lysosome-associated membrane glycoprotein 2	274	LNSSTIK	Hex(7)HexNAc(7)Fuc(1)	3464.42	3464.43	3	3.6	2.15	241.36	26.52
P13473	Lysosome-associated membrane glycoprotein 2	274	LNSSTIK	Hex(7)HexNAc(7)Fuc(1)NeuAc(1)	3755.51	3755.51	3	-0.1	2.73	298.39	35.75
P13473	Lysosome-associated membrane glycoprotein 2	274	LNSSTIK	Hex(7)HexNAc(7)NeuAc(1)	3609.46	3609.47	3	3.8	2.02	237.32	10.04
P13473	Lysosome-associated membrane glycoprotein 2	352	VQPFNVTQGK	Hex(4)HexNAc(3)Fuc(1)NeuAc(1)	2812.2	2812.2	3	-1.3	5.67	398.73	141.32
P13473	Lysosome-associated membrane glycoprotein 2	352	VQPFNVTQGK	Hex(4)HexNAc(3)NeuAc(1)	2666.14	2666.16	2	4.1	6.28	527.44	211.45
P13473	Lysosome-associated membrane glycoprotein 2	352	VQPFNVTQGK	Hex(4)HexNAc(4)Fuc(1)	2724.19	2724.19	3	0.7	3.74	261.68	65.76
P13473	Lysosome-associated membrane glycoprotein 2	352	VQPFNVTQGK	Hex(4)HexNAc(5)	2781.21	2781.22	3	2.5	5.49	330.62	153.38
P13473	Lysosome-associated membrane glycoprotein 2	352	VQPFNVTQGK	Hex(4)HexNAc(5)Fuc(1)	2927.27	2927.26	3	-0.8	5.33	360.78	115.6
P13473	Lysosome-associated membrane glycoprotein 2	352	VQPFNVTQGK	Hex(4)HexNAc(6)Fuc(1)	3130.35	3130.36	3	4.8	5.03	354.84	135.69
P13473	Lysosome-associated membrane glycoprotein 2	352	VQPFNVTQGK	Hex(5)HexNAc(3)	2537.1	2537.1	2	-1.6	4.38	326.35	112.42
P13473	Lysosome-associated membrane glycoprotein 2	352	VQPFNVTQGK	Hex(5)HexNAc(3)Fuc(1)NeuAc(1)	2974.26	2974.24	3	-3.9	3	353.73	57.13
P13473	Lysosome-associated membrane glycoprotein 2	352	VQPFNVTQGK	Hex(5)HexNAc(3)NeuAc(1)	2828.2	2828.2	3	0.5	6.51	503.79	246.26
P13473	Lysosome-associated membrane glycoprotein 2	352	VQPFNVTQGK	Hex(5)HexNAc(4)	2740.18	2740.19	3	4.3	5.5	402.55	164.42
P13473	Lysosome-associated membrane glycoprotein 2	352	VQPFNVTQGK	Hex(5)HexNAc(4)Fuc(1)	2886.24	2886.24	3	0.7	6.14	437.58	185.68
P13473	Lysosome-associated membrane glycoprotein 2	352	VQPFNVTQGK	Hex(5)HexNAc(4)Fuc(1)NeuAc(1)	3177.34	3177.34	3	2	6.26	496.12	191.11
P13473	Lysosome-associated membrane glycoprotein 2	352	VQPFNVTQGK	Hex(5)HexNAc(4)Fuc(2)	3032.3	3032.29	3	-0.8	5.4	344.31	122.8
P13473	Lysosome-associated membrane glycoprotein 2	352	VQPFNVTQGK	Hex(5)HexNAc(4)Fuc(3)	3178.36	3178.34	3	-4.6	2.9	294.82	134.34
P13473	Lysosome-associated membrane glycoprotein 2	352	VQPFNVTQGK	Hex(5)HexNAc(4)Fuc(3)NeuAc(1)	3469.45	3469.44	3	-3.3	2.3	260.39	59.78
P13473	Lysosome-associated membrane glycoprotein 2	352	VQPFNVTQGK	Hex(5)HexNAc(4)NeuAc(1)	3031.28	3031.29	3	4	5.86	443.16	174.05
P13473	Lysosome-associated membrane glycoprotein 2	352	VQPFNVTQGK	Hex(5)HexNAc(4)NeuAc(2)	3322.37	3322.36	3	-3.1	2	262.19	39.19
P13473	Lysosome-associated membrane glycoprotein 2	352	VQPFNVTQGK	Hex(5)HexNAc(5)	2943.26	2943.26	3	-0.3	4.96	305.43	112.95
P13473	Lysosome-associated membrane glycoprotein 2	352	VQPFNVTQGK	Hex(5)HexNAc(5)Fuc(1)	3089.32	3089.32	3	0.2	5.81	415.63	158.64
P13473	Lysosome-associated membrane glycoprotein 2	352	VQPFNVTQGK	Hex(5)HexNAc(5)Fuc(1)NeuAc(1)	3380.41	3380.42	3	2.9	3.07	284.1	106.4
P13473	Lysosome-associated membrane glycoprotein 2	352	VQPFNVTQGK	Hex(5)HexNAc(6)	3146.34	3146.33	3	-1.8	5.06	321.95	112.98
P13473	Lysosome-associated membrane glycoprotein 2	352	VQPFNVTQGK	Hex(5)HexNAc(6)Fuc(1)	3292.4	3292.4	3	1.1	6.22	450.93	170.87
P13473	Lysosome-associated membrane glycoprotein 2	352	VQPFNVTQGK	Hex(5)HexNAc(6)Fuc(1)NeuAc(1)	3583.49	3583.5	3	1.4	5.84	389.9	158.41
P13473	Lysosome-associated membrane glycoprotein 2	352	VQPFNVTQGK	Hex(5)HexNAc(6)Fuc(2)	3438.46	3438.44	3	-3.6	4.84	330.36	109.04
P13473	Lysosome-associated membrane glycoprotein 2	352	VQPFNVTQGK	Hex(5)HexNAc(6)NeuAc(1)	3437.44	3437.45	3	3.8	4.85	329.43	114.6
P13473	Lysosome-associated membrane glycoprotein 2	352	VQPFNVTQGK	Hex(6)HexNAc(2)	2496.08	2496.08	2	1.5	5.94	563.62	213.79
P13473	Lysosome-associated membrane glycoprotein 2	352	VQPFNVTQGK	Hex(6)HexNAc(3)	2699.16	2699.15	3	-0.2	6.23	477.45	165.64
P13473	Lysosome-associated membrane glycoprotein 2	352	VQPFNVTQGK	Hex(6)HexNAc(3)NeuAc(1)	2990.25	2990.25	3	0	6.27	482.2	191.14
P13473	Lysosome-associated membrane glycoprotein 2	352	VQPFNVTQGK	Hex(6)HexNAc(4)	2902.23	2902.23	3	-0.3	5.89	385.49	187.05
P13473	Lysosome-associated membrane glycoprotein 2	352	VQPFNVTQGK	Hex(6)HexNAc(5)Fuc(1)	3251.37	3251.36	3	-2.7	4.52	379.62	65.43
P13473	Lysosome-associated membrane glycoprotein 2	352	VQPFNVTQGK	Hex(6)HexNAc(5)Fuc(1)NeuAc(1)	3542.47	3542.47	3	2.2	6.09	472.71	168.03
P13473	Lysosome-associated membrane glycoprotein 2	352	VQPFNVTQGK	Hex(6)HexNAc(5)Fuc(1)NeuAc(2)	3833.56	3833.57	3	0.8	6.21	457.91	159.44
P13473	Lysosome-associated membrane glycoprotein 2	352	VQPFNVTQGK	Hex(6)HexNAc(5)NeuAc(1)	3396.41	3396.41	3	1.5	5.83	377.66	145.99
P13473	Lysosome-associated membrane glycoprotein 2	352	VQPFNVTQGK	Hex(6)HexNAc(6)	3308.39	3308.4	3	2.8	4.99	327.28	117.73
P13473	Lysosome-associated membrane glycoprotein 2	352	VQPFNVTQGK	Hex(6)HexNAc(6)Fuc(1)	3454.45	3454.45	3	0	4.78	355.64	129.04
P13473	Lysosome-associated membrane glycoprotein 2	352	VQPFNVTQGK	Hex(6)HexNAc(6)Fuc(1)NeuAc(1)	3745.55	3745.55	3	0.7	5.85	418.51	155.76
P13473	Lysosome-associated membrane glycoprotein 2	352	VQPFNVTQGK	Hex(6)HexNAc(6)Fuc(2)	3600.51	3600.52	3	2.1	5.14	358.11	99.15
P13473	Lysosome-associated membrane glycoprotein 2	352	VQPFNVTQGK	Hex(6)HexNAc(6)Fuc(2)NeuAc(1)	3891.6	3891.59	3	-4	2.52	268.61	46.67
P13473	Lysosome-associated membrane glycoprotein 2	352	VQPFNVTQGK	Hex(6)HexNAc(6)NeuAc(2)	3890.58	3890.59	3	2.8	2.79	260.7	42.37
P13473	Lysosome-associated membrane glycoprotein 2	352	VQPFNVTQGK	Hex(6)HexNAc(7)Fuc(4)NeuAc(1)	4386.8	4387.8	3	-0.3	4.81	291.21	106.72
P13473	Lysosome-associated membrane glycoprotein 2	352	VQPFNVTQGK	Hex(7)HexNAc(2)	2658.13	2658.13	2	1	6.85	546.35	234.99
P13473	Lysosome-associated membrane glycoprotein 2	352	VQPFNVTQGK	Hex(8)HexNAc(2)	2820.18	2820.19	2	3.4	5.65	405.6	154.33
P13473	Lysosome-associated membrane glycoprotein 2	352	VQPFNVTQGK	Hex(9)HexNAc(2)	2982.23	2982.23	2	-0.5	5.32	352.95	115.48
P13688	Carcinoembryonic antigen-related cell adhesion molecule 1	191	LQLSN+GNR	Hex(6)HexNAc(4)	2687.1	2687.1	2	-0.5	2.28	282.52	38.43
P13688	Carcinoembryonic antigen-related cell adhesion molecule 1	191	LQLSN+GNR	Hex(7)HexNAc(4)	2849.16	2849.16	3	0.5	2	178.94	44.55
P13688	Carcinoembryonic antigen-related cell adhesion molecule 1	374	LSQGNTTLSINPVK	Hex(5)HexNAc(2)	2688.23	2688.23	3	-0.2	14.28	816.8	516.29
P13688	Carcinoembryonic antigen-related cell adhesion molecule 1	374	LSQGNTTLSINPVK	Hex(6)HexNAc(2)	2850.29	2850.29	3	0.3	14.31	841.25	565.57
P13688	Carcinoembryonic antigen-related cell adhesion molecule 1	374	LSQGNTTLSINPVK	Hex(6)HexNAc(3)NeuAc(1)	3344.46	3344.46	3	-0.3	5.49	318.19	191.46
P13688	Carcinoembryonic antigen-related cell adhesion molecule 1	374	LSQGNTTLSINPVK	Hex(7)HexNAc(2)	3012.34	3012.34	3	-0.6	14.24	803.39	449.38
P13688	Carcinoembryonic antigen-related cell adhesion molecule 1	374	LSQGNTTLSINPVK	Hex(8)HexNAc(2)	3174.39	3174.39	3	0.6	9.41	623.66	373.93
P13688	Carcinoembryonic antigen-related cell adhesion molecule 1	374	LSQGNTTLSINPVKR	Hex(4)HexNAc(3)Fuc(2)	3177.48	3177.46	3	-4.8	4.84	310.13	162.05
P13688	Carcinoembryonic antigen-related cell adhesion molecule 1	374	LSQGNTTLSINPVKR	Hex(5)HexNAc(2)	2844.34	2844.34	3	0	11.16	669.79	464.58
P13688	Carcinoembryonic antigen-related cell adhesion molecule 1	374	LSQGNTTLSINPVKR	Hex(5)HexNAc(3)NeuAc(1)	3338.51	3338.51	3	-0.2	5.48	369.94	121.42
P13688	Carcinoembryonic antigen-related cell adhesion molecule 1	374	LSQGNTTLSINPVKR	Hex(5)HexNAc(4)	3250.49	3250.51	3	4.8	2.13	267.91	58.85
P13688	Carcinoembryonic antigen-related cell adhesion molecule 1	374	LSQGNTTLSINPVKR	Hex(6)HexNAc(2)	3006.39	3006.39	3	0.7	9.23	596.31	380.98
P13688	Carcinoembryonic antigen-related cell adhesion molecule 1	374	LSQGNTTLSINPVKR	Hex(6)HexNAc(3)	3209.47	3209.47	3	-0.6	5.76	382.41	183.92
P13688	Carcinoembryonic antigen-related cell adhesion molecule 1	374	LSQGNTTLSINPVKR	Hex(6)HexNAc(3)NeuAc(1)	3500.56	3500.57	3	1.1	6.28	462.88	208
P13688	Carcinoembryonic antigen-related cell adhesion molecule 1	374	LSQGNTTLSINPVKR	Hex(7)HexNAc(2)	3168.44	3168.44	3	0.5	6.75	520.31	343.29
P13688	Carcinoembryonic antigen-related cell adhesion molecule 1	374	LSQGNTTLSINPVKR	Hex(8)HexNAc(2)	3330.49	3330.5	3	1	6.63	511.52	325.98
P13688	Carcinoembryonic antigen-related cell adhesion molecule 1	374	LSQGNTTLSINPVKR	Hex(4)HexNAc(3)NeuAc(1)	3176.46	3176.46	3	1.9	5.73	389.3	151.57
P13688	Carcinoembryonic antigen-related cell adhesion molecule 1	363	NQSLPSSER	Hex(5)HexNAc(5)Fuc(1)	2989.21	2989.22	3	0.7	2.31	222.33	76.75
P13688	Carcinoembryonic antigen-related cell adhesion molecule 1	363	NQSLPSSER	Hex(6)HexNAc(3)NeuAc(1)	2890.15	2890.14	3	-1.7	2.94	243.68	69.03
P13688	Carcinoembryonic antigen-related cell adhesion molecule 1	363	NQSLPSSER	Hex(6)HexNAc(5)NeuAc(2)	3587.4	3587.41	3	2	2.12	217.47	78.62
P13688	Carcinoembryonic antigen-related cell adhesion molecule 1	363	NQSLPSSER	Hex(6)HexNAc(6)Fuc(1)NeuAc(1)	3645.44	3645.45	3	2.3	2.43	233.03	47.89
P13688	Carcinoembryonic antigen-related cell adhesion molecule 1	363	NQSLPSSER	Hex(6)HexNAc(6)Fuc(1)NeuAc(2)	3936.54	3936.53	3	-1.4	2.2	219.43	81.63
P13688	Carcinoembryonic antigen-related cell adhesion molecule 1	363	NQSLPSSER	Hex(6)HexNAc(6)Fuc(2)	3500.41	3500.42	3	3.1	2.2	209.96	96.17
P13688	Carcinoembryonic antigen-related cell adhesion molecule 1	363	NQSLPSSER	Hex(6)HexNAc(6)Fuc(3)	3646.46	3646.47	3	2.2	2.21	201.94	81.85
P13688	Carcinoembryonic antigen-related cell adhesion molecule 1	335	TTVTGDKDSVNLTC*STNDTGISIR	Hex(5)HexNAc(5)Fuc(1)NeuAc(1)	4818.04	4818.03	3	-2.6	5.83	470.57	12.96
P13688	Carcinoembryonic antigen-related cell adhesion molecule 1	335	TTVTGDKDSVNLTC*STNDTGISIR	Hex(4)HexNAc(5)Fuc(1)	4364.89	4365.91	3	4	4.95	417.06	10.27
P13688	Carcinoembryonic antigen-related cell adhesion molecule 1	335	TTVTGDKDSVNLTC*STNDTGISIR	Hex(5)HexNAc(5)Fuc(1)	4526.94	4526.94	3	-1	5.05	471.45	11.49
P13688	Carcinoembryonic antigen-related cell adhesion molecule 1	335	TTVTGDKDSVNLTC*STNDTGISIR	Hex(6)HexNAc(6)Fuc(1)	4892.08	4893.09	4	1.2	4.64	342.81	11.74
P13688	Carcinoembryonic antigen-related cell adhesion molecule 1	359	WFFKNQSLPSSER	Hex(5)HexNAc(5)Fuc(1)NeuAc(1)	3888.62	3888.63	3	2.7	5.88	468.25	218.83
P13688	Carcinoembryonic antigen-related cell adhesion molecule 1	359	WFFKNQSLPSSER	Hex(5)HexNAc(5)Fuc(4)	4035.7	4034.71	3	3.5	2.95	244.74	140.59
P13688	Carcinoembryonic antigen-related cell adhesion molecule 1	359	WFFKNQSLPSSER	Hex(6)HexNAc(5)NeuAc(2)	4195.71	4196.71	3	-1.4	2.4	348.49	56.71
P13688	Carcinoembryonic antigen-related cell adhesion molecule 1	359	WFFKNQSLPSSER	Hex(6)HexNAc(6)Fuc(1)NeuAc(1)	4253.75	4252.77	3	4.8	2.19	237.62	67.75
P13688	Carcinoembryonic antigen-related cell adhesion molecule 1	359	WFFKNQSLPSSER	Hex(6)HexNAc(6)Fuc(1)NeuAc(2)	4544.85	4545.84	4	-3.1	3.69	281.26	112.13
P13688	Carcinoembryonic antigen-related cell adhesion molecule 1	359	WFFKNQSLPSSER	Hex(6)HexNAc(6)Fuc(2)	4108.72	4108.73	3	3.7	4.53	402.11	187.03
P13688	Carcinoembryonic antigen-related cell adhesion molecule 1	359	WFFKNQSLPSSER	Hex(6)HexNAc(6)Fuc(2)NeuAc(1)	4399.81	4399.82	3	1.2	5.81	434.28	80.59
P13688	Carcinoembryonic antigen-related cell adhesion molecule 1	359	WFFKNQSLPSSER	Hex(6)HexNAc(6)Fuc(3)	4254.77	4254.78	3	1.4	2.86	301.34	94.74
P13688	Carcinoembryonic antigen-related cell adhesion molecule 1	359	WFFKNQSLPSSER	Hex(6)HexNAc(6)Fuc(4)	4400.83	4399.83	3	1.4	2.72	259.87	126.12
P14384	Carboxypeptidase M	34	TVAQNYSSVTHLHSIGK	Hex(5)HexNAc(5)Fuc(1)NeuAc(2)	4395.86	4395.85	4	-2.1	3.27	380.53	179.63
P14410	Sucrase-isomaltase, intestinal	436	ANGTTYATYER	Hex(5)HexNAc(5)Fuc(1)NeuAc(2)	3800.48	3800.48	3	0	2	175.95	48.18
P14410	Sucrase-isomaltase, intestinal	1388	FDGLWIDMNEPSSFVNGTTTNQC*R	Hex(4)HexNAc(4)Fuc(1)NeuAc(1)	4686.91	4686.9	3	-1.6	6.3	397.45	69.9
P14410	Sucrase-isomaltase, intestinal	1388	FDGLWIDMNEPSSFVNGTTTNQC*R	Hex(4)HexNAc(6)	4655.92	4656.93	4	1.5	2.15	226.64	50.48
P14410	Sucrase-isomaltase, intestinal	1388	FDGLWIDMNEPSSFVNGTTTNQC*R	Hex(5)HexNAc(3)Fuc(2)	4500.85	4499.86	4	4.2	4.6	309.31	170.03
P14410	Sucrase-isomaltase, intestinal	1388	FDGLWIDMNEPSSFVNGTTTNQC*R	Hex(5)HexNAc(4)Fuc(2)	4703.93	4702.94	4	3.8	2.91	311.84	94.77
P14410	Sucrase-isomaltase, intestinal	1388	FDGLWIDMNEPSSFVNGTTTNQC*R	Hex(6)HexNAc(3)Fuc(2)	4662.9	4661.91	4	2.1	5.02	285.19	163.21
P14410	Sucrase-isomaltase, intestinal	1388	FDGLWIDMNEPSSFVNGTTTNQC*R	Hex(6)HexNAc(3)NeuAc(1)	4661.88	4661.9	4	3.6	2.87	240.2	23.44
P14410	Sucrase-isomaltase, intestinal	1388	FDGLWIDMNEPSSFVNGTTTNQC*R	Hex(6)HexNAc(4)Fuc(2)	4865.98	4865	4	5.1	3.75	262.14	128.68
P14410	Sucrase-isomaltase, intestinal	1388	FDGLWIDMNEPxSSFVNGTTTNQC*R	Hex(5)HexNAc(3)	4224.73	4224.73	3	1	5.79	448.94	257.84
P14410	Sucrase-isomaltase, intestinal	1388	FDGLWIDMNEPxSSFVNGTTTNQC*R	Hex(6)HexNAc(2)	4183.7	4183.71	3	2.4	12.33	722.92	611.32
P14410	Sucrase-isomaltase, intestinal	1388	FDGLWIDMNEPxSSFVNGTTTNQC*R	Hex(6)HexNAc(3)	4386.78	4386.78	3	0.9	6.8	454.96	308.79
P14410	Sucrase-isomaltase, intestinal	1388	FDGLWIDMNEPxSSFVNGTTTNQC*R	Hex(7)HexNAc(2)	4345.75	4345.75	3	0.1	13.51	770.2	632.94
P14410	Sucrase-isomaltase, intestinal	1388	FDGLWIDMNEPxSSFVNGTTTNQC*R	Hex(8)HexNAc(2)	4507.81	4506.79	3	-3.2	8.15	547.89	481.71
P14410	Sucrase-isomaltase, intestinal	1388	FDGLWIDMNEPxSSFVNGTTTNQC*R	Hex(9)HexNAc(2)	4669.86	4669.86	3	0.8	8.23	537.2	457.18
P14410	Sucrase-isomaltase, intestinal	1669	GQFQ+TFNASYDTINLHVR	Hex(5)HexNAc(5)Fuc(3)	4375.85	4376.87	4	3.5	2.01	203.76	23.24
P14410	Sucrase-isomaltase, intestinal	1669	GQFQTFNASYDTINLHVR	Hex(4)HexNAc(5)	3774.64	3774.65	3	1.8	6.78	498.26	271.68
P14410	Sucrase-isomaltase, intestinal	1669	GQFQTFNASYDTINLHVR	Hex(4)HexNAc(5)Fuc(1)	3920.7	3920.7	3	1.2	11.58	686.39	406.42
P14410	Sucrase-isomaltase, intestinal	1669	GQFQTFNASYDTINLHVR	Hex(4)HexNAc(5)Fuc(1)NeuAc(1)	4211.79	4211.8	3	1.1	8.22	598.86	106.91
P14410	Sucrase-isomaltase, intestinal	1669	GQFQTFNASYDTINLHVR	Hex(4)HexNAc(5)Fuc(2)	4066.75	4066.76	3	0.8	10.64	643.37	390.44
P14410	Sucrase-isomaltase, intestinal	1669	GQFQTFNASYDTINLHVR	Hex(4)HexNAc(5)Fuc(3)	4212.81	4213.8	3	-3	6.26	475.32	64.04
P14410	Sucrase-isomaltase, intestinal	1669	GQFQTFNASYDTINLHVR	Hex(4)HexNAc(5)Fuc(4)NeuAc(1)	4649.97	4650.98	3	2.1	6.84	506.43	25
P14410	Sucrase-isomaltase, intestinal	1669	GQFQTFNASYDTINLHVR	Hex(4)HexNAc(5)NeuAc(1)	4065.73	4064.73	3	0.8	5.1	392.77	126.66
P14410	Sucrase-isomaltase, intestinal	1669	GQFQTFNASYDTINLHVR	Hex(4)HexNAc(6)Fuc(1)	4123.78	4123.78	3	1.8	5.53	348.75	212.44
P14410	Sucrase-isomaltase, intestinal	1669	GQFQTFNASYDTINLHVR	Hex(5)HexNAc(4)Fuc(1)NeuAc(1)	4170.77	4170.78	3	2.8	6.33	482.74	96.99
P14410	Sucrase-isomaltase, intestinal	1669	GQFQTFNASYDTINLHVR	Hex(5)HexNAc(4)Fuc(1)NeuAc(2)	4461.86	4460.84	3	-3.7	6.5	524.2	153.23
P14410	Sucrase-isomaltase, intestinal	1669	GQFQTFNASYDTINLHVR	Hex(5)HexNAc(4)Fuc(2)NeuAc(1)	4316.82	4316.83	3	1.3	4.65	339.56	120.59
P14410	Sucrase-isomaltase, intestinal	1669	GQFQTFNASYDTINLHVR	Hex(5)HexNAc(5)	3936.69	3936.69	3	0.4	6.24	448	131.96
P14410	Sucrase-isomaltase, intestinal	1669	GQFQTFNASYDTINLHVR	Hex(5)HexNAc(5)Fuc(1)	4082.75	4082.75	3	1.2	11.58	654.95	385.03
P14410	Sucrase-isomaltase, intestinal	1669	GQFQTFNASYDTINLHVR	Hex(5)HexNAc(5)Fuc(1)NeuAc(1)	4373.84	4373.86	3	4	6.74	579.12	75.65
P14410	Sucrase-isomaltase, intestinal	1669	GQFQTFNASYDTINLHVR	Hex(5)HexNAc(5)Fuc(1)NeuAc(2)	4664.94	4664.94	3	-1	6.81	514.52	38.04
P14410	Sucrase-isomaltase, intestinal	1669	GQFQTFNASYDTINLHVR	Hex(5)HexNAc(5)Fuc(2)	4228.81	4227.82	3	4.2	6.71	482.79	286.24
P14410	Sucrase-isomaltase, intestinal	1669	GQFQTFNASYDTINLHVR	Hex(5)HexNAc(5)Fuc(2)NeuAc(1)	4519.9	4518.91	4	2.3	6.21	361.55	173.33
P14410	Sucrase-isomaltase, intestinal	1669	GQFQTFNASYDTINLHVR	Hex(5)HexNAc(5)Fuc(3)NeuAc(1)	4665.96	4666.96	4	-1	6.07	384.04	72.5
P14410	Sucrase-isomaltase, intestinal	1669	GQFQTFNASYDTINLHVR	Hex(5)HexNAc(5)Fuc(4)NeuAc(2)	5103.11	5103.14	3	4.2	5.13	357.16	92.26
P14410	Sucrase-isomaltase, intestinal	1669	GQFQTFNASYDTINLHVR	Hex(5)HexNAc(5)NeuAc(1)	4227.79	4227.8	4	3.1	5.21	380.43	11.89
P14410	Sucrase-isomaltase, intestinal	1669	GQFQTFNASYDTINLHVR	Hex(5)HexNAc(6)Fuc(1)NeuAc(1)	4576.92	4576.94	3	3.5	6.45	477.57	60.01
P14410	Sucrase-isomaltase, intestinal	1669	GQFQTFNASYDTINLHVR	Hex(5)HexNAc(6)Fuc(2)	4431.89	4430.89	3	1.6	5.44	441.67	104.35
P14410	Sucrase-isomaltase, intestinal	1669	GQFQTFNASYDTINLHVR	Hex(6)HexNAc(5)Fuc(1)NeuAc(1)	4535.9	4535.92	3	4.9	4.13	349.02	64.16
P14410	Sucrase-isomaltase, intestinal	1669	GQFQTFNASYDTINLHVR	Hex(6)HexNAc(6)Fuc(1)	4447.88	4446.88	3	0.4	7.38	577.25	248.5
P14410	Sucrase-isomaltase, intestinal	1669	GQFQTFNASYDTINLHVR	Hex(6)HexNAc(6)Fuc(1)NeuAc(1)	4738.98	4739.98	4	0	6.29	370.76	66.62
P14410	Sucrase-isomaltase, intestinal	1669	GQFQTFNASYDTINLHVR	Hex(6)HexNAc(6)Fuc(2)	4593.94	4593.93	3	-2.3	5.13	404.67	9.96
P14410	Sucrase-isomaltase, intestinal	1669	GQFQTFNASYDTINLHVR	Hex(6)HexNAc(6)Fuc(4)NeuAc(2)	5468.25	5469.26	4	2.1	4.38	289.11	150.54
P14410	Sucrase-isomaltase, intestinal	1669	GQFQTFNASYDTINLHVR	Hex(7)HexNAc(6)Fuc(2)NeuAc(1)	5047.09	5046.09	4	0.3	6.34	408.86	45.75
P14410	Sucrase-isomaltase, intestinal	1669	GQFQTFNASYDTINLHVR	Hex(7)HexNAc(6)Fuc(2)NeuAc(2)	5338.18	5338.17	4	-2.2	4.45	264.97	24.1
P14410	Sucrase-isomaltase, intestinal	1669	GQFQTFNASYDTINLHVR	Hex(7)HexNAc(7)Fuc(4)NeuAc(1)	5542.28	5542.31	4	4.6	2.07	215.04	144.85
P14410	Sucrase-isomaltase, intestinal	1669	GQFQTFNASYDTINLHVR	Hex(9)HexNAc(2)	3975.66	3975.68	3	2.9	11.37	697.57	437.82
P14410	Sucrase-isomaltase, intestinal	1669	GQFQTFNASYDTINLHVR	Hex(5)HexNAc(6)Fuc(1)	4285.83	4285.83	3	0	9.22	609.72	243.61
P14410	Sucrase-isomaltase, intestinal	1669	GQFQTFNASYDTINLHVR	Hex(5)HexNAc(7)Fuc(1)	4488.91	4488.91	3	1	4.71	334.09	122.2
P14410	Sucrase-isomaltase, intestinal	1669	GQFQTFNASYDTINLHVR	Hex(6)HexNAc(7)Fuc(1)	4650.96	4651.96	3	-1.1	5.74	398.63	107.56
P14410	Sucrase-isomaltase, intestinal	1669	GQFQTFNASYDTINLHVR	Hex(6)HexNAc(7)Fuc(2)	4797.02	4797.04	3	3.6	6.48	521.36	188.4
P14410	Sucrase-isomaltase, intestinal	1669	GQFQTFNASYDTINLHVR	Hex(5)HexNAc(5)Fuc(4)NeuAc(1)	4812.02	4813	4	-3.6	6.33	484.87	11.69
P14410	Sucrase-isomaltase, intestinal	1669	GQFQTFNASYDTINLHVR	Hex(7)HexNAc(7)Fuc(1)	4813.01	4813.02	3	2	6.78	518.56	22.3
P14410	Sucrase-isomaltase, intestinal	1669	GQFQTFNASYDTINLHVR	Hex(7)HexNAc(6)Fuc(1)NeuAc(1)	4901.03	4901.03	3	-0.9	6.42	441.97	64.22
P14410	Sucrase-isomaltase, intestinal	1669	GQFQTFNASYDTINLHVR	Hex(5)HexNAc(5)Fuc(3)NeuAc(2)	4957.06	4958.06	3	0.5	6.95	540.9	21.9
P14410	Sucrase-isomaltase, intestinal	1669	GQFQTFNASYDTINLHVR	Hex(7)HexNAc(7)Fuc(2)	4959.07	4959.08	4	1.4	6.06	409.99	169.29
P14410	Sucrase-isomaltase, intestinal	1669	GQFQTFNASYDTINLHVR	Hex(5)HexNAc(6)Fuc(2)NeuAc(2)	5014.08	5014.06	4	-4.4	4.51	260.53	101.79
P14410	Sucrase-isomaltase, intestinal	1669	GQFQTFNASYDTINLHVR	Hex(5)HexNAc(6)Fuc(4)NeuAc(1)	5015.1	5015.1	4	0.6	6.06	404.52	10.21
P14410	Sucrase-isomaltase, intestinal	1669	GQFQTFNASYDTINLHVR	Hex(7)HexNAc(7)Fuc(1)NeuAc(1)	5104.11	5104.1	3	-1.2	6.36	444.7	40.25
P14410	Sucrase-isomaltase, intestinal	1669	GQFQTFNASYDTINLHVR	Hex(5)HexNAc(6)Fuc(5)NeuAc(1)	5161.16	5162.18	4	3.9	5.02	308.57	137.71
P14410	Sucrase-isomaltase, intestinal	1669	GQFQTFNASYDTINLHVR	Hex(6)HexNAc(6)Fuc(4)NeuAc(1)	5177.15	5178.14	4	-2.9	6.12	437.26	183.73
P14410	Sucrase-isomaltase, intestinal	1669	GQFQTFNASYDTINLHVR	Hex(7)HexNAc(6)Fuc(1)NeuAc(2)	5192.13	5193.12	4	-0.9	2	232.21	23.74
P14410	Sucrase-isomaltase, intestinal	1669	GQFQTFNASYDTINLHVR	Hex(7)HexNAc(7)Fuc(2)NeuAc(1)	5250.17	5250.17	4	1.2	5.85	329.96	30.81
P14410	Sucrase-isomaltase, intestinal	1669	GQFQTFNASYDTINLHVR	Hex(5)HexNAc(6)Fuc(4)NeuAc(2)	5306.19	5307.2	4	1.1	5.53	287.68	73.42
P14410	Sucrase-isomaltase, intestinal	1669	GQFQTFNASYDTINLHVR	Hex(6)HexNAc(6)Fuc(5)NeuAc(1)	5323.21	5323.21	4	-0.3	6.1	356.54	10.04
P14410	Sucrase-isomaltase, intestinal	1669	GQFQTFNASYDTINLHVR	Hex(6)HexNAc(6)Fuc(2)NeuAc(3)	5467.23	5468.23	4	1.1	2.7	224.22	17.45
P14410	Sucrase-isomaltase, intestinal	1669	GQFQTFNASYDTINLHVR	Hex(7)HexNAc(7)Fuc(5)NeuAc(1)	5688.34	5689.34	4	-1	5.19	267	132.18
P14410	Sucrase-isomaltase, intestinal	1669	GQFQTFNASYDTINLHVR	Hex(6)HexNAc(6)Fuc(4)NeuAc(3)	5759.34	5759.36	4	2.9	2.13	211.62	63.73
P14410	Sucrase-isomaltase, intestinal	1669	GQFQTFNASYDTINLHVR	Hex(10)HexNAc(2)	4137.72	4137.71	3	-2.3	5.03	357.63	150.66
P14410	Sucrase-isomaltase, intestinal	1760	GYINK	Hex(6)HexNAc(2)	1972.8	1972.81	2	3.1	2.46	266.54	64.14
P14410	Sucrase-isomaltase, intestinal	1760	GYINK	Hex(7)HexNAc(2)	2134.85	2134.86	2	1.2	3.77	431.9	79.72
P14410	Sucrase-isomaltase, intestinal	1760	GYINK	Hex(8)HexNAc(2)	2296.91	2296.91	2	2.1	4.6	439.9	99.28
P14410	Sucrase-isomaltase, intestinal	1760	GYINK	Hex(9)HexNAc(2)	2458.96	2458.96	2	0.7	4.69	438.44	97.45
P14410	Sucrase-isomaltase, intestinal	1809	IDLTTHNVTLEEPIEINWS	Hex(5)HexNAc(5)Fuc(1)	4195.83	4194.85	3	4.3	5.23	369.03	39.9
P14410	Sucrase-isomaltase, intestinal	1809	IDLTTHNVTLEEPIEINWS	Hex(5)HexNAc(5)Fuc(1)NeuAc(1)	4486.93	4486.94	4	1.8	5.72	293.4	19.1
P14410	Sucrase-isomaltase, intestinal	811	KN+PLGLIVALGENNTAK	Hex(9)HexNAc(2)	3617.62	3617.62	2	0.3	2.15	249.48	31.83
P14410	Sucrase-isomaltase, intestinal	811	KNPLGLIVALGENN+TAK	Hex(5)HexNAc(5)Fuc(4)	4162.88	4163.89	4	2.7	5.08	253.5	253.5
P14410	Sucrase-isomaltase, intestinal	811	KNPLGLIVALGENN+TAK	Hex(5)HexNAc(6)Fuc(1)NeuAc(1)	4218.88	4219.9	4	3.3	2	147.72	37.76
P14410	Sucrase-isomaltase, intestinal	811	KNPLGLIVALGENNTAK	Hex(3)HexNAc(5)Fuc(1)	3399.61	3399.62	3	1.6	6.96	460.48	359.36
P14410	Sucrase-isomaltase, intestinal	811	KNPLGLIVALGENNTAK	Hex(4)HexNAc(5)Fuc(1)	3561.67	3561.67	3	1.9	11.56	656.09	436.14
P14410	Sucrase-isomaltase, intestinal	811	KNPLGLIVALGENNTAK	Hex(4)HexNAc(5)Fuc(1)NeuAc(1)	3852.76	3852.77	3	2.8	6.59	494.87	292.45
P14410	Sucrase-isomaltase, intestinal	811	KNPLGLIVALGENNTAK	Hex(4)HexNAc(5)Fuc(4)NeuAc(1)	4290.94	4291.94	3	-0.7	6.04	468.19	58
P14410	Sucrase-isomaltase, intestinal	811	KNPLGLIVALGENNTAK	Hex(4)HexNAc(6)Fuc(4)	4202.92	4203.91	3	-3.4	3.72	286.07	190.15
P14410	Sucrase-isomaltase, intestinal	811	KNPLGLIVALGENNTAK	Hex(5)HexNAc(4)Fuc(1)NeuAc(1)	3811.74	3811.74	3	1.6	7.26	568.33	333.54
P14410	Sucrase-isomaltase, intestinal	811	KNPLGLIVALGENNTAK	Hex(5)HexNAc(4)Fuc(1)NeuAc(2)	4102.83	4102.83	4	-0.2	7.02	456.85	11.29
P14410	Sucrase-isomaltase, intestinal	811	KNPLGLIVALGENNTAK	Hex(5)HexNAc(4)Fuc(3)NeuAc(2)	4394.95	4395.96	4	2	6.09	339.9	33.79
P14410	Sucrase-isomaltase, intestinal	811	KNPLGLIVALGENNTAK	Hex(5)HexNAc(5)Fuc(1)	3723.72	3723.72	3	1	8.7	590.48	375.49
P14410	Sucrase-isomaltase, intestinal	811	KNPLGLIVALGENNTAK	Hex(5)HexNAc(5)Fuc(1)NeuAc(1)	4014.82	4014.82	4	0.1	10.5	612.72	36.2
P14410	Sucrase-isomaltase, intestinal	811	KNPLGLIVALGENNTAK	Hex(5)HexNAc(5)Fuc(1)NeuAc(2)	4305.91	4305.91	3	-0.6	7.32	566.14	55.22
P14410	Sucrase-isomaltase, intestinal	811	KNPLGLIVALGENNTAK	Hex(5)HexNAc(5)Fuc(2)	3869.78	3869.78	3	0.4	7.01	516.53	331.8
P14410	Sucrase-isomaltase, intestinal	811	KNPLGLIVALGENNTAK	Hex(5)HexNAc(5)Fuc(2)NeuAc(1)	4160.87	4160.87	3	-1	5.47	403.16	18.84
P14410	Sucrase-isomaltase, intestinal	811	KNPLGLIVALGENNTAK	Hex(5)HexNAc(5)Fuc(3)	4015.84	4014.84	4	3.1	6.16	341.06	210.57
P14410	Sucrase-isomaltase, intestinal	811	KNPLGLIVALGENNTAK	Hex(5)HexNAc(5)Fuc(3)NeuAc(1)	4306.93	4305.93	3	1.2	5.71	407.15	212.54
P14410	Sucrase-isomaltase, intestinal	811	KNPLGLIVALGENNTAK	Hex(5)HexNAc(5)Fuc(4)NeuAc(2)	4744.08	4745.11	3	4.4	5.16	379.4	75.76
P14410	Sucrase-isomaltase, intestinal	811	KNPLGLIVALGENNTAK	Hex(5)HexNAc(5)NeuAc(1)	3868.76	3868.77	3	2.6	4.75	320.14	149.91
P14410	Sucrase-isomaltase, intestinal	811	KNPLGLIVALGENNTAK	Hex(5)HexNAc(5)NeuAc(2)	4159.85	4159.87	3	3.6	4.85	374.89	33.88
P14410	Sucrase-isomaltase, intestinal	811	KNPLGLIVALGENNTAK	Hex(5)HexNAc(6)	3780.74	3780.74	3	0.7	3.48	295.08	106.83
P14410	Sucrase-isomaltase, intestinal	811	KNPLGLIVALGENNTAK	Hex(5)HexNAc(6)Fuc(1)NeuAc(1)	4217.9	4216.88	4	-2.1	5.29	276.29	193.12
P14410	Sucrase-isomaltase, intestinal	811	KNPLGLIVALGENNTAK	Hex(5)HexNAc(6)Fuc(2)	4072.86	4072.87	3	1.9	4.06	289.78	136.14
P14410	Sucrase-isomaltase, intestinal	811	KNPLGLIVALGENNTAK	Hex(6)HexNAc(5)Fuc(1)	3885.77	3885.79	3	3.6	5.03	360.82	196.7
P14410	Sucrase-isomaltase, intestinal	811	KNPLGLIVALGENNTAK	Hex(6)HexNAc(5)Fuc(1)NeuAc(1)	4176.87	4176.88	3	2.2	6.02	464.9	108.8
P14410	Sucrase-isomaltase, intestinal	811	KNPLGLIVALGENNTAK	Hex(6)HexNAc(5)Fuc(2)	4031.83	4031.84	4	3	6.52	441.45	311.08
P14410	Sucrase-isomaltase, intestinal	811	KNPLGLIVALGENNTAK	Hex(6)HexNAc(5)Fuc(2)NeuAc(1)	4322.93	4322.94	4	3.9	5.97	397.33	26.7
P14410	Sucrase-isomaltase, intestinal	811	KNPLGLIVALGENNTAK	Hex(6)HexNAc(6)Fuc(1)	4088.85	4088.86	3	1.6	7.12	553.37	335.36
P14410	Sucrase-isomaltase, intestinal	811	KNPLGLIVALGENNTAK	Hex(6)HexNAc(6)Fuc(1)NeuAc(1)	4379.95	4379.95	3	0.2	8.38	593.3	116.64
P14410	Sucrase-isomaltase, intestinal	811	KNPLGLIVALGENNTAK	Hex(6)HexNAc(6)Fuc(1)NeuAc(2)	4671.04	4671.05	3	0.5	6.73	463.85	57.95
P14410	Sucrase-isomaltase, intestinal	811	KNPLGLIVALGENNTAK	Hex(6)HexNAc(6)Fuc(1)NeuAc(3)	4962.14	4961.14	4	0.9	2.17	182.16	47.79
P14410	Sucrase-isomaltase, intestinal	811	KNPLGLIVALGENNTAK	Hex(6)HexNAc(6)Fuc(2)	4234.91	4234.93	3	4.1	6.79	536.06	347.07
P14410	Sucrase-isomaltase, intestinal	811	KNPLGLIVALGENNTAK	Hex(6)HexNAc(6)Fuc(2)NeuAc(1)	4526.01	4526	3	-0.8	6.39	552.71	23.39
P14410	Sucrase-isomaltase, intestinal	811	KNPLGLIVALGENNTAK	Hex(6)HexNAc(6)Fuc(2)NeuAc(2)	4817.1	4817.11	4	2.6	4.72	294.83	19.14
P14410	Sucrase-isomaltase, intestinal	811	KNPLGLIVALGENNTAK	Hex(6)HexNAc(6)Fuc(3)	4380.97	4380.98	4	3.7	4	295.61	195.29
P14410	Sucrase-isomaltase, intestinal	811	KNPLGLIVALGENNTAK	Hex(7)HexNAc(6)Fuc(2)	4396.96	4396.98	4	2.9	2.87	256.87	135.46
P14410	Sucrase-isomaltase, intestinal	811	KNPLGLIVALGENNTAK	Hex(7)HexNAc(6)Fuc(2)NeuAc(1)	4688.06	4688.06	3	0.9	5.36	365.81	34.9
P14410	Sucrase-isomaltase, intestinal	811	KNPLGLIVALGENNTAK	Hex(9)HexNAc(2)	3616.64	3616.64	3	1	11.64	694.17	456.19
P14410	Sucrase-isomaltase, intestinal	811	KNPLGLIVALGENNTAK	Hex(5)HexNAc(6)Fuc(1)	3926.8	3926.8	3	0.7	6.81	481.32	256.7
P14410	Sucrase-isomaltase, intestinal	811	KNPLGLIVALGENNTAK	Hex(5)HexNAc(7)Fuc(1)NeuAc(1)	4420.97	4420.97	3	-1	2.44	264.37	54.32
P14410	Sucrase-isomaltase, intestinal	811	KNPLGLIVALGENNTAK	Hex(5)HexNAc(5)Fuc(4)NeuAc(1)	4452.99	4453.98	3	-3.3	6.5	513.55	42.77
P14410	Sucrase-isomaltase, intestinal	811	KNPLGLIVALGENNTAK	Hex(7)HexNAc(6)Fuc(1)NeuAc(1)	4542	4541.99	3	-1.9	6.6	497.89	219
P14410	Sucrase-isomaltase, intestinal	811	KNPLGLIVALGENNTAK	Hex(6)HexNAc(7)Fuc(1)NeuAc(1)	4583.03	4583.03	4	1.5	3.34	244.78	39.68
P14410	Sucrase-isomaltase, intestinal	811	KNPLGLIVALGENNTAK	Hex(7)HexNAc(7)Fuc(2)	4600.04	4600.05	3	0.8	5.06	409.96	33.6
P14410	Sucrase-isomaltase, intestinal	811	KNPLGLIVALGENNTAK	Hex(7)HexNAc(6)Fuc(4)	4689.08	4689.09	3	1.3	3.65	264.06	126.31
P14410	Sucrase-isomaltase, intestinal	811	KNPLGLIVALGENNTAK	Hex(7)HexNAc(7)Fuc(1)NeuAc(1)	4745.08	4745.09	3	2	6.58	427.85	17.39
P14410	Sucrase-isomaltase, intestinal	811	KNPLGLIVALGENNTAK	Hex(6)HexNAc(6)Fuc(4)NeuAc(1)	4818.12	4819.1	4	-5.1	2.49	259.26	123.31
P14410	Sucrase-isomaltase, intestinal	811	KNPLGLIVALGENNTAK	Hex(7)HexNAc(6)Fuc(1)NeuAc(2)	4833.1	4833.12	4	4.1	2.99	244.26	13.12
P14410	Sucrase-isomaltase, intestinal	811	KNPLGLIVALGENNTAK	Hex(7)HexNAc(7)Fuc(2)NeuAc(1)	4891.14	4890.16	4	4.6	3.92	252.37	158.09
P14410	Sucrase-isomaltase, intestinal	811	KNPLGLIVALGENNTAK	Hex(7)HexNAc(7)Fuc(4)	4892.16	4891.18	4	4.3	2.08	204.65	143.82
P14410	Sucrase-isomaltase, intestinal	811	KNPLGLIVALGENNTAK	Hex(6)HexNAc(6)Fuc(5)NeuAc(1)	4964.18	4965.18	4	-0.8	2.01	208.4	140.28
P14410	Sucrase-isomaltase, intestinal	812	NPLGLIVALGENNTAK	Hex(4)HexNAc(5)Fuc(1)	3433.57	3433.57	3	-1.1	6.09	396.11	256.69
P14410	Sucrase-isomaltase, intestinal	812	NPLGLIVALGENNTAK	Hex(5)HexNAc(5)Fuc(1)	3595.63	3595.64	3	2.8	7.01	527.95	378.72
P14410	Sucrase-isomaltase, intestinal	812	NPLGLIVALGENNTAK	Hex(5)HexNAc(5)Fuc(1)NeuAc(1)	3886.72	3886.72	3	1.1	9.48	593.66	443.96
P14410	Sucrase-isomaltase, intestinal	812	NPLGLIVALGENNTAK	Hex(5)HexNAc(5)Fuc(1)NeuAc(2)	4177.82	4177.8	4	-4.5	2.29	203.35	120.56
P14410	Sucrase-isomaltase, intestinal	812	NPLGLIVALGENNTAK	Hex(5)HexNAc(5)Fuc(3)	3887.74	3887.73	3	-1.9	5.92	404.97	187.44
P14410	Sucrase-isomaltase, intestinal	812	NPLGLIVALGENNTAK	Hex(5)HexNAc(5)Fuc(3)NeuAc(1)	4178.84	4177.83	3	-0.8	5.38	300.39	20.36
P14410	Sucrase-isomaltase, intestinal	812	NPLGLIVALGENNTAK	Hex(6)HexNAc(5)Fuc(2)	3903.74	3903.75	3	3.1	6.63	451.32	359.24
P14410	Sucrase-isomaltase, intestinal	812	NPLGLIVALGENNTAK	Hex(6)HexNAc(6)Fuc(1)	3960.76	3960.75	4	-1.3	6.02	375.67	183.48
P14410	Sucrase-isomaltase, intestinal	812	NPLGLIVALGENNTAK	Hex(6)HexNAc(6)Fuc(1)NeuAc(1)	4251.85	4250.86	3	3.6	6.93	491.63	340.66
P14410	Sucrase-isomaltase, intestinal	812	NPLGLIVALGENNTAK	Hex(6)HexNAc(6)Fuc(2)	4106.82	4105.82	3	2.3	4	313.44	50.34
P14410	Sucrase-isomaltase, intestinal	812	NPLGLIVALGENNTAK	Hex(6)HexNAc(6)Fuc(2)NeuAc(1)	4397.91	4398.92	4	2	6.17	371.97	28.21
P14410	Sucrase-isomaltase, intestinal	812	NPLGLIVALGENNTAK	Hex(7)HexNAc(6)Fuc(2)NeuAc(1)	4559.96	4560.95	3	-3.1	3.77	253	99.26
P14410	Sucrase-isomaltase, intestinal	812	NPLGLIVALGENNTAK	Hex(9)HexNAc(2)	3488.54	3488.53	3	-1.7	7.17	557.07	373.73
P14410	Sucrase-isomaltase, intestinal	435	RANGTTYATYER	Hex(5)HexNAc(5)Fuc(1)	3374.39	3374.4	3	2	5.5	323.23	132.96
P14410	Sucrase-isomaltase, intestinal	435	RANGTTYATYER	Hex(5)HexNAc(5)Fuc(1)NeuAc(2)	3956.58	3956.59	3	1.7	5.27	312.6	129.84
P14410	Sucrase-isomaltase, intestinal	1759	RGYINK	Hex(8)HexNAc(2)	2453.01	2453.01	3	-0.2	2.03	276.61	15.74
P14410	Sucrase-isomaltase, intestinal	1759	RGYINK	Hex(9)HexNAc(2)	2615.06	2615.06	3	0.4	2.18	307.86	18.8
P14410	Sucrase-isomaltase, intestinal	1565	RQDPASWNETFAEMSR	Hex(4)HexNAc(4)Fuc(1)	3531.45	3531.45	3	0.3	5.45	345.49	145.38
P14410	Sucrase-isomaltase, intestinal	1565	RQDPASWNETFAEMSR	Hex(4)HexNAc(5)Fuc(1)	3734.53	3734.53	3	0	4.56	325.6	83.97
P14410	Sucrase-isomaltase, intestinal	1565	RQDPASWNETFAEMSR	Hex(5)HexNAc(4)Fuc(1)	3693.5	3693.5	3	-1	5.51	368.42	191.98
P14410	Sucrase-isomaltase, intestinal	1565	RQDPASWNETFAEMSR	Hex(5)HexNAc(5)Fuc(1)	3896.58	3896.58	3	1.2	6.09	346.26	165.4
P14410	Sucrase-isomaltase, intestinal	1565	RQDPASWNETFAEMSR	Hex(5)HexNAc(5)Fuc(1)NeuAc(1)	4187.67	4187.67	3	-1	5.35	322.46	115.47
P14410	Sucrase-isomaltase, intestinal	1565	RQDPASWNETFAEMSR	Hex(6)HexNAc(6)Fuc(1)	4261.71	4260.72	3	3.5	3.36	272.13	94.9
P14410	Sucrase-isomaltase, intestinal	1565	RQDPASWNETFAEMSR	Hex(9)HexNAc(2)	3789.49	3789.48	3	-3	6.06	378.97	249.29
P14410	Sucrase-isomaltase, intestinal	1346	TLTEDEAVNASR	Hex(4)HexNAc(5)Fuc(1)	3115.29	3115.3	3	2.3	2.45	299.38	72
P14410	Sucrase-isomaltase, intestinal	1346	TLTEDEAVNASR	Hex(6)HexNAc(6)Fuc(1)	3642.48	3642.48	3	-0.4	4.89	307.07	99.98
P14410	Sucrase-isomaltase, intestinal	1346	TLTEDEAVNASR	Hex(8)HexNAc(2)	3008.21	3008.2	2	-1.5	5.86	369.98	175.25
P14410	Sucrase-isomaltase, intestinal	1346	TLTEDEAVNASR	Hex(9)HexNAc(2)	3170.26	3170.27	3	0.9	7.14	561.4	345.49
P14410	Sucrase-isomaltase, intestinal	1346	TLTEDEAVNASR	Hex(5)HexNAc(5)Fuc(4)NeuAc(1)	4006.62	4007.62	3	-0.3	2.47	243.71	15.25
P14410	Sucrase-isomaltase, intestinal	1346	TLTEDEAVNASR	Hex(10)HexNAc(2)	3332.32	3332.31	3	-0.9	5.23	284.16	154.21
P14410	Sucrase-isomaltase, intestinal	1334	VWPDLPNITIDK	Hex(4)HexNAc(5)Fuc(4)NeuAc(1)	3949.7	3949.7	3	1	6.18	361.49	228.69
P14410	Sucrase-isomaltase, intestinal	1334	VWPDLPNITIDK	Hex(5)HexNAc(5)Fuc(1)	3382.48	3382.49	3	2.2	5.35	310.88	190.08
P14410	Sucrase-isomaltase, intestinal	1334	VWPDLPNITIDK	Hex(5)HexNAc(5)Fuc(1)NeuAc(1)	3673.58	3673.58	3	0.1	8	527.47	331.36
P14410	Sucrase-isomaltase, intestinal	1334	VWPDLPNITIDK	Hex(5)HexNAc(5)Fuc(1)NeuAc(2)	3964.67	3964.67	3	0.6	8.27	571.52	401.72
P14410	Sucrase-isomaltase, intestinal	1334	VWPDLPNITIDK	Hex(5)HexNAc(5)Fuc(2)NeuAc(1)	3819.63	3819.64	3	2.1	2.75	240.66	106.04
P14410	Sucrase-isomaltase, intestinal	1334	VWPDLPNITIDK	Hex(5)HexNAc(5)Fuc(4)NeuAc(2)	4402.85	4403.84	3	-1.2	5.01	277.9	15.01
P14410	Sucrase-isomaltase, intestinal	1334	VWPDLPNITIDK	Hex(6)HexNAc(5)Fuc(2)NeuAc(1)	3981.69	3981.69	3	1	5.99	324.95	223.12
P14410	Sucrase-isomaltase, intestinal	1334	VWPDLPNITIDK	Hex(6)HexNAc(6)Fuc(1)	3747.61	3747.62	3	1.5	5.18	271.74	173.3
P14410	Sucrase-isomaltase, intestinal	1334	VWPDLPNITIDK	Hex(6)HexNAc(6)Fuc(1)NeuAc(1)	4038.71	4038.71	3	1.3	6.85	538.77	58.09
P14410	Sucrase-isomaltase, intestinal	1334	VWPDLPNITIDK	Hex(6)HexNAc(6)Fuc(1)NeuAc(2)	4329.8	4329.81	3	0.8	6.67	485.22	29.82
P14410	Sucrase-isomaltase, intestinal	1334	VWPDLPNITIDK	Hex(6)HexNAc(6)Fuc(1)NeuAc(3)	4620.9	4620.9	3	0.8	6.14	400.52	12.41
P14410	Sucrase-isomaltase, intestinal	1334	VWPDLPNITIDK	Hex(6)HexNAc(6)Fuc(2)	3893.67	3893.68	3	2.3	5.98	397.14	237.55
P14410	Sucrase-isomaltase, intestinal	1334	VWPDLPNITIDK	Hex(6)HexNAc(6)Fuc(2)NeuAc(1)	4184.77	4184.77	3	1.9	6.08	438.58	63.99
P14410	Sucrase-isomaltase, intestinal	1334	VWPDLPNITIDK	Hex(6)HexNAc(6)Fuc(2)NeuAc(2)	4475.86	4475.87	3	1.3	7.12	551.02	32.1
P14410	Sucrase-isomaltase, intestinal	1334	VWPDLPNITIDK	Hex(6)HexNAc(6)Fuc(3)NeuAc(1)	4330.82	4330.84	3	2.4	2.48	244.33	50.15
P14410	Sucrase-isomaltase, intestinal	1334	VWPDLPNITIDK	Hex(6)HexNAc(6)Fuc(3)NeuAc(2)	4621.92	4622.91	4	-2	6.8	444.55	366.13
P14410	Sucrase-isomaltase, intestinal	1334	VWPDLPNITIDK	Hex(6)HexNAc(6)Fuc(4)NeuAc(2)	4767.98	4768.98	3	0	6.11	367.59	226.71
P14410	Sucrase-isomaltase, intestinal	1334	VWPDLPNITIDK	Hex(6)HexNAc(6)Fuc(5)NeuAc(2)	4914.04	4915.05	3	1.8	5.84	324.08	204.21
P14410	Sucrase-isomaltase, intestinal	1334	VWPDLPNITIDK	Hex(7)HexNAc(6)Fuc(2)NeuAc(1)	4346.82	4346.83	3	3.3	5.82	384.75	49.48
P14410	Sucrase-isomaltase, intestinal	1334	VWPDLPNITIDK	Hex(7)HexNAc(6)Fuc(2)NeuAc(2)	4637.92	4636.93	4	4	2.37	152.85	131.04
P14410	Sucrase-isomaltase, intestinal	1334	VWPDLPNITIDK	Hex(7)HexNAc(6)Fuc(3)	4201.78	4201.79	3	2.7	2.88	260.34	137.76
P14410	Sucrase-isomaltase, intestinal	1334	VWPDLPNITIDK	Hex(9)HexNAc(2)	3275.4	3275.41	3	2.5	10.14	639.74	423.68
P14410	Sucrase-isomaltase, intestinal	1334	VWPDLPNITIDK	Hex(6)HexNAc(7)NeuAc(1)	4095.73	4096.74	3	2	5.61	303.42	22.86
P14410	Sucrase-isomaltase, intestinal	1334	VWPDLPNITIDK	Hex(5)HexNAc(5)Fuc(4)NeuAc(1)	4111.75	4112.75	3	-0.3	6.68	510.64	54.19
P14410	Sucrase-isomaltase, intestinal	1334	VWPDLPNITIDK	Hex(7)HexNAc(6)Fuc(1)NeuAc(1)	4200.76	4199.77	3	2.9	5.16	264.69	159.92
P14410	Sucrase-isomaltase, intestinal	1334	VWPDLPNITIDK	Hex(6)HexNAc(7)Fuc(1)NeuAc(1)	4241.79	4240.77	3	-4.2	2	213.36	106.88
P14410	Sucrase-isomaltase, intestinal	1334	VWPDLPNITIDK	Hex(7)HexNAc(7)NeuAc(1)	4257.78	4258.79	3	1.6	6.25	435.2	10.86
P14410	Sucrase-isomaltase, intestinal	1334	VWPDLPNITIDK	Hex(7)HexNAc(7)Fuc(2)	4258.8	4258.82	3	2.9	6.17	448.95	254.24
P14410	Sucrase-isomaltase, intestinal	1334	VWPDLPNITIDK	Hex(5)HexNAc(6)Fuc(4)NeuAc(1)	4314.83	4315.84	3	1.3	2.01	200.26	110.23
P14410	Sucrase-isomaltase, intestinal	1334	VWPDLPNITIDK	Hex(7)HexNAc(7)Fuc(1)NeuAc(1)	4403.84	4404.86	3	2.5	6.53	506.94	70.09
P14410	Sucrase-isomaltase, intestinal	1334	VWPDLPNITIDK	Hex(6)HexNAc(6)Fuc(4)NeuAc(1)	4476.88	4476.89	4	2.3	2.46	210.01	155.73
P14410	Sucrase-isomaltase, intestinal	1334	VWPDLPNITIDK	Hex(7)HexNAc(7)Fuc(2)NeuAc(1)	4549.9	4548.9	3	1.1	6.44	362.21	45.1
P14410	Sucrase-isomaltase, intestinal	1334	VWPDLPNITIDK	Hex(7)HexNAc(7)Fuc(4)	4550.92	4549.93	3	3.3	6.46	455.23	224.1
P14410	Sucrase-isomaltase, intestinal	1334	VWPDLPNITIDK	Hex(6)HexNAc(6)Fuc(5)NeuAc(1)	4622.94	4623.94	3	-0.5	5.45	301.07	186.9
P14410	Sucrase-isomaltase, intestinal	1334	VWPDLPNITIDK	Hex(7)HexNAc(7)Fuc(1)NeuAc(2)	4694.94	4694.95	3	1.9	4.94	248.96	11.96
P14410	Sucrase-isomaltase, intestinal	1334	VWPDLPNITIDK	Hex(7)HexNAc(7)Fuc(1)NeuAc(3)	4986.03	4986.01	3	-4.4	2.15	181.85	106.5
P14410	Sucrase-isomaltase, intestinal	1334	VWPDLPNITIDK	Hex(6)HexNAc(6)Fuc(4)NeuAc(3)	5059.07	5060.09	3	1.9	5.09	276.34	157.51
P14410	Sucrase-isomaltase, intestinal	1334	VWPDLPNITIDK	Hex(10)HexNAc(2)	3437.45	3437.45	3	0.6	5.98	379.61	164.1
P14410	Sucrase-isomaltase, intestinal	1231	YGYANTSEVR	Hex(5)HexNAc(5)Fuc(1)	3131.26	3131.27	3	2.9	4.66	307.19	81.97
P14410	Sucrase-isomaltase, intestinal	1231	YGYANTSEVR	Hex(5)HexNAc(5)Fuc(1)NeuAc(1)	3422.35	3422.37	2	3.9	3.71	402.6	54.79
P14410	Sucrase-isomaltase, intestinal	1231	YGYANTSEVR	Hex(6)HexNAc(6)Fuc(1)	3496.39	3496.39	3	0.6	3.06	280.3	57.29
P14410	Sucrase-isomaltase, intestinal	1231	YGYANTSEVR	Hex(6)HexNAc(6)Fuc(1)NeuAc(1)	3787.48	3787.49	3	2.8	4.41	345.02	68.76
P14410	Sucrase-isomaltase, intestinal	1231	YGYANTSEVR	Hex(9)HexNAc(2)	3024.17	3024.17	3	-1.8	5.44	366.27	133.13
P14410	Sucrase-isomaltase, intestinal	1292	YIIILDPAISGNETK	Hex(5)HexNAc(3)	3066.4	3066.41	2	1.1	5.43	414.59	186.34
P14410	Sucrase-isomaltase, intestinal	1292	YIIILDPAISGNETK	Hex(5)HexNAc(3)Fuc(2)	3358.52	3358.51	3	-1.8	6.62	465.23	312.47
P14410	Sucrase-isomaltase, intestinal	1292	YIIILDPAISGNETK	Hex(5)HexNAc(3)NeuAc(1)	3357.5	3357.49	3	-0.8	10.42	616.79	335.57
P14410	Sucrase-isomaltase, intestinal	1292	YIIILDPAISGNETK	Hex(5)HexNAc(4)	3269.48	3269.48	3	-1.8	8.21	583.07	322.83
P14410	Sucrase-isomaltase, intestinal	1292	YIIILDPAISGNETK	Hex(5)HexNAc(4)Fuc(1)	3415.54	3415.55	3	2.7	6.52	451.1	282.24
P14410	Sucrase-isomaltase, intestinal	1292	YIIILDPAISGNETK	Hex(5)HexNAc(4)Fuc(1)NeuAc(1)	3706.63	3706.63	3	-0.2	11.46	650.91	359.65
P14410	Sucrase-isomaltase, intestinal	1292	YIIILDPAISGNETK	Hex(5)HexNAc(4)Fuc(2)NeuAc(2)	4143.79	4144.81	3	4.3	6.14	420.93	98.23
P14410	Sucrase-isomaltase, intestinal	1292	YIIILDPAISGNETK	Hex(5)HexNAc(4)NeuAc(1)	3560.58	3560.57	3	-1.5	8.17	593.94	357.51
P14410	Sucrase-isomaltase, intestinal	1292	YIIILDPAISGNETK	Hex(5)HexNAc(4)NeuAc(2)	3851.67	3851.67	3	-1.3	6.98	562.3	318.1
P14410	Sucrase-isomaltase, intestinal	1292	YIIILDPAISGNETK	Hex(5)HexNAc(5)NeuAc(2)	4054.75	4055.74	3	-2.5	4.06	299.33	163.91
P14410	Sucrase-isomaltase, intestinal	1292	YIIILDPAISGNETK	Hex(6)HexNAc(2)	3025.38	3025.36	2	-4.2	9.08	583.11	234.94
P14410	Sucrase-isomaltase, intestinal	1292	YIIILDPAISGNETK	Hex(6)HexNAc(3)	3228.45	3228.44	3	-4	10.99	665	430.79
P14410	Sucrase-isomaltase, intestinal	1292	YIIILDPAISGNETK	Hex(6)HexNAc(3)Fuc(1)	3374.51	3374.52	3	2.2	8.09	557.67	353.51
P14410	Sucrase-isomaltase, intestinal	1292	YIIILDPAISGNETK	Hex(6)HexNAc(3)NeuAc(1)	3519.55	3519.57	2	4.8	10.16	648.17	284.51
P14410	Sucrase-isomaltase, intestinal	1292	YIIILDPAISGNETK	Hex(6)HexNAc(4)	3431.53	3431.54	3	1.8	10.45	640.8	385.81
P14410	Sucrase-isomaltase, intestinal	1292	YIIILDPAISGNETK	Hex(6)HexNAc(4)Fuc(1)	3577.59	3577.61	3	4	6.4	479.1	310.44
P14410	Sucrase-isomaltase, intestinal	1292	YIIILDPAISGNETK	Hex(6)HexNAc(4)Fuc(1)NeuAc(1)	3868.69	3868.69	3	1.1	10.48	626.29	342.24
P14410	Sucrase-isomaltase, intestinal	1292	YIIILDPAISGNETK	Hex(6)HexNAc(4)Fuc(2)	3723.65	3723.66	3	1.5	7.03	533.35	329.35
P14410	Sucrase-isomaltase, intestinal	1292	YIIILDPAISGNETK	Hex(6)HexNAc(4)NeuAc(1)	3722.63	3722.63	3	0.6	10.53	642.44	334.11
P14410	Sucrase-isomaltase, intestinal	1292	YIIILDPAISGNETK	Hex(6)HexNAc(5)Fuc(1)	3780.67	3780.68	3	2.3	7.01	518.3	342.04
P14410	Sucrase-isomaltase, intestinal	1292	YIIILDPAISGNETK	Hex(6)HexNAc(5)Fuc(1)NeuAc(1)	4071.77	4070.76	3	-2.1	3.01	314.69	96.75
P14410	Sucrase-isomaltase, intestinal	1292	YIIILDPAISGNETK	Hex(6)HexNAc(5)NeuAc(1)	3925.71	3925.7	3	-3.5	5.23	412.31	230.46
P14410	Sucrase-isomaltase, intestinal	1292	YIIILDPAISGNETK	Hex(6)HexNAc(5)NeuAc(2)	4216.8	4216.82	3	2.6	6.5	474.47	12.36
P14410	Sucrase-isomaltase, intestinal	1292	YIIILDPAISGNETK	Hex(7)HexNAc(2)	3187.43	3187.43	3	-0.3	6.54	510.49	165.74
P14410	Sucrase-isomaltase, intestinal	1292	YIIILDPAISGNETK	Hex(7)HexNAc(4)	3593.59	3593.6	3	3.2	8	543.37	308.54
P14410	Sucrase-isomaltase, intestinal	1292	YIIILDPAISGNETK	Hex(7)HexNAc(4)Fuc(1)	3739.65	3739.66	3	4.4	6.45	443.3	294.99
P14410	Sucrase-isomaltase, intestinal	1292	YIIILDPAISGNETK	Hex(7)HexNAc(4)Fuc(1)NeuAc(1)	4030.74	4030.75	3	2.3	10.32	602.76	47.45
P14410	Sucrase-isomaltase, intestinal	1292	YIIILDPAISGNETK	Hex(7)HexNAc(4)Fuc(2)	3885.7	3885.72	3	4.1	6.4	516.95	296.86
P14410	Sucrase-isomaltase, intestinal	1292	YIIILDPAISGNETK	Hex(7)HexNAc(4)NeuAc(1)	3884.68	3884.7	3	3.2	10.26	616.57	342.2
P14410	Sucrase-isomaltase, intestinal	1292	YIIILDPAISGNETK	Hex(7)HexNAc(5)Fuc(2)	4088.78	4088.79	3	0.9	6.69	456.68	270.45
P14410	Sucrase-isomaltase, intestinal	1292	YIIILDPAISGNETK	Hex(7)HexNAc(5)Fuc(2)NeuAc(1)	4379.88	4379.89	3	1.8	3.98	340.65	114.92
P14410	Sucrase-isomaltase, intestinal	1292	YIIILDPAISGNETK	Hex(7)HexNAc(5)NeuAc(1)	4087.76	4087.77	3	1.6	8.54	582.83	76.29
P14410	Sucrase-isomaltase, intestinal	1292	YIIILDPAISGNETK	Hex(8)HexNAc(2)	3349.48	3349.49	2	2.2	5.91	456.77	156.71
P14410	Sucrase-isomaltase, intestinal	1292	YIIILDPAISGNETK	Hex(9)HexNAc(2)	3511.53	3511.53	2	-2.3	11.26	662.33	266.07
P14410	Sucrase-isomaltase, intestinal	1292	YIIILDPAISGNETK	Hex(6)HexNAc(5)	3634.61	3634.63	3	4.4	6.72	548.51	352.71
P14410	Sucrase-isomaltase, intestinal	1292	YIIILDPAISGNETK	Hex(6)HexNAc(4)Fuc(3)	3869.71	3869.72	3	3	5.85	324.99	255.59
P14410	Sucrase-isomaltase, intestinal	1292	YIIILDPAISGNETK	Hex(6)HexNAc(4)NeuAc(2)	4013.73	4013.73	3	1.2	9.48	591.13	11.05
P14410	Sucrase-isomaltase, intestinal	1292	YIIILDPAISGNETK	Hex(7)HexNAc(4)Fuc(3)	4031.76	4030.77	3	2.2	7.08	517.53	344.13
P14410	Sucrase-isomaltase, intestinal	1292	YIIILDPAISGNETK	Hex(7)HexNAc(4)NeuAc(2)	4175.78	4175.78	3	0	9.46	583.54	14.37
P14410	Sucrase-isomaltase, intestinal	1292	YIIILDPAISGNETK	Hex(7)HexNAc(5)Fuc(1)NeuAc(1)	4233.82	4233.82	3	0.7	6.81	507.76	94.77
P14410	Sucrase-isomaltase, intestinal	1292	YIIILDPAISGNETK	Hex(7)HexNAc(5)NeuAc(2)	4378.86	4378.85	3	-1.8	5.84	355.79	184.95
P14410	Sucrase-isomaltase, intestinal	1292	YIIILDPxAISGNETK	Hex(6)HexNAc(3)Fuc(2)	3536.57	3536.58	3	3.1	2.62	229.35	136.63
P15144	Aminopeptidase N	231	AEFNITLIHPK	Hex(5)HexNAc(5)	3108.38	3108.38	3	1.8	5.35	346.46	205.24
P15144	Aminopeptidase N	231	AEFNITLIHPK	Hex(5)HexNAc(6)	3311.46	3311.46	3	2.4	5.09	346.64	168.84
P15144	Aminopeptidase N	231	AEFNITLIHPK	Hex(7)HexNAc(2)	2823.24	2823.24	3	0.2	6.44	436.59	225.24
P15144	Aminopeptidase N	231	AEFNITLIHPK	Hex(5)HexNAc(6)Fuc(1)	3457.51	3457.52	3	0.7	6.09	367.21	189.38
P15144	Aminopeptidase N	253	GPSTPLPEDPNWNVTEFHTTPK	Hex(4)HexNAc(5)NeuAc(1)	4418.88	4417.87	3	-0.8	6.09	355.5	126.99
P15144	Aminopeptidase N	253	GPSTPLPEDPNWNVTEFHTTPK	Hex(5)HexNAc(5)NeuAc(2)	4872.03	4872.04	4	1.5	6.22	364.01	24.09
P15144	Aminopeptidase N	126	KLNYTLSQGHR	Hex(4)HexNAc(5)	2980.32	2980.32	4	0.3	3.89	276.5	73.18
P15144	Aminopeptidase N	126	KLNYTLSQGHR	Hex(5)HexNAc(5)	3142.37	3142.37	3	1.8	4.84	375.98	107.79
P15144	Aminopeptidase N	126	KLNYTLSQGHR	Hex(5)HexNAc(5)NeuAc(1)	3433.46	3433.47	4	2.6	3.03	245.76	77.13
P15144	Aminopeptidase N	674	VPVTLALNNTLFLIEER	Hex(5)HexNAc(5)NeuAc(1)	4058.86	4058.85	4	-0.7	5.53	269.24	152.31
P15151	Poliovirus receptor	105	NASLR	Hex(5)HexNAc(4)	2182.9	2182.9	3	-0.3	2.13	311.24	12.37
P15151	Poliovirus receptor	105	NASLR	Hex(6)HexNAc(4)	2344.95	2344.95	3	-0.2	2.29	310.57	25.16
P15151	Poliovirus receptor	218	NVTC*K	Hex(4)HexNAc(5)	2284.91	2284.91	2	1.8	3.06	414.6	69.44
P15151	Poliovirus receptor	218	NVTC*K	Hex(4)HexNAc(5)Fuc(1)	2430.97	2430.97	3	-0.8	2.14	222.82	50.99
P15151	Poliovirus receptor	218	NVTC*K	Hex(4)HexNAc(5)NeuAc(1)	2576.01	2576.01	3	2.1	2.38	281.55	56.35
P15151	Poliovirus receptor	218	NVTC*K	Hex(5)HexNAc(5)	2446.96	2446.97	2	0.6	3.51	395.54	74.03
P15151	Poliovirus receptor	218	NVTC*K	Hex(5)HexNAc(6)	2650.04	2650.05	3	1.7	2.31	274.85	59.66
P15151	Poliovirus receptor	218	NVTC*K	Hex(6)HexNAc(6)	2812.1	2812.1	3	2.5	2.59	312.84	67.61
P15151	Poliovirus receptor	218	NVTC*K	Hex(5)HexNAc(6)Fuc(3)NeuAc(2)	3670.41	3670.4	3	-3.3	2.41	284.46	60.55
P15151	Poliovirus receptor	115	VEDEGNYTC*LFVTFPQGSR	Hex(5)HexNAc(4)Fuc(1)NeuAc(1)	4278.74	4278.75	3	1.7	7.26	572.35	68.33
P15151	Poliovirus receptor	115	VEDEGNYTC*LFVTFPQGSR	Hex(5)HexNAc(4)Fuc(1)NeuAc(2)	4569.84	4569.84	3	0.1	6.8	491.84	19.19
P15151	Poliovirus receptor	115	VEDEGNYTC*LFVTFPQGSR	Hex(5)HexNAc(4)Fuc(2)	4133.7	4133.72	3	4.8	3.51	270.01	137.88
P15151	Poliovirus receptor	115	VEDEGNYTC*LFVTFPQGSR	Hex(5)HexNAc(4)Fuc(2)NeuAc(1)	4424.8	4423.79	3	-1.4	6.85	461.32	26.39
P15151	Poliovirus receptor	115	VEDEGNYTC*LFVTFPQGSR	Hex(5)HexNAc(4)Fuc(3)	4279.76	4279.78	3	3.5	5.79	321.23	182.25
P15151	Poliovirus receptor	115	VEDEGNYTC*LFVTFPQGSR	Hex(5)HexNAc(4)Fuc(3)NeuAc(1)	4570.86	4571.84	4	-4.1	5.83	367.91	94.5
P15151	Poliovirus receptor	115	VEDEGNYTC*LFVTFPQGSR	Hex(5)HexNAc(4)NeuAc(2)	4423.78	4424.79	4	1.1	5.57	278.32	11.06
P15151	Poliovirus receptor	115	VEDEGNYTC*LFVTFPQGSR	Hex(5)HexNAc(5)Fuc(1)	4190.73	4190.72	3	-0.9	10.53	612	445.12
P15151	Poliovirus receptor	115	VEDEGNYTC*LFVTFPQGSR	Hex(5)HexNAc(5)Fuc(1)NeuAc(1)	4481.82	4481.83	4	1	10.74	645.84	29.58
P15151	Poliovirus receptor	115	VEDEGNYTC*LFVTFPQGSR	Hex(5)HexNAc(5)Fuc(1)NeuAc(2)	4772.92	4772.92	3	0.8	11.65	661.03	12.58
P15151	Poliovirus receptor	115	VEDEGNYTC*LFVTFPQGSR	Hex(5)HexNAc(5)Fuc(2)	4336.78	4336.8	3	3.8	6.36	466.14	248.77
P15151	Poliovirus receptor	115	VEDEGNYTC*LFVTFPQGSR	Hex(5)HexNAc(5)Fuc(2)NeuAc(1)	4627.88	4626.89	3	2.9	10.63	631.79	399.5
P15151	Poliovirus receptor	115	VEDEGNYTC*LFVTFPQGSR	Hex(5)HexNAc(5)Fuc(3)	4482.84	4483.83	3	-4.2	5	273.99	171.7
P15151	Poliovirus receptor	115	VEDEGNYTC*LFVTFPQGSR	Hex(5)HexNAc(5)Fuc(3)NeuAc(1)	4773.94	4774.93	4	-3.1	8.14	555.3	77.66
P15151	Poliovirus receptor	115	VEDEGNYTC*LFVTFPQGSR	Hex(6)HexNAc(4)Fuc(2)	4295.76	4296.77	3	1.8	5.31	298.35	131.21
P15151	Poliovirus receptor	115	VEDEGNYTC*LFVTFPQGSR	Hex(6)HexNAc(5)Fuc(1)NeuAc(1)	4643.87	4644.89	4	3	6.85	503.59	19.78
P15151	Poliovirus receptor	115	VEDEGNYTC*LFVTFPQGSR	Hex(6)HexNAc(5)Fuc(2)	4498.84	4498.85	3	3.7	7.18	550.43	378.48
P15151	Poliovirus receptor	115	VEDEGNYTC*LFVTFPQGSR	Hex(6)HexNAc(5)Fuc(2)NeuAc(1)	4789.93	4789.95	4	3.6	10.44	613.37	24.12
P15151	Poliovirus receptor	115	VEDEGNYTC*LFVTFPQGSR	Hex(6)HexNAc(5)Fuc(3)NeuAc(1)	4935.99	4936.98	3	-3.7	6.07	386.92	229.39
P15151	Poliovirus receptor	115	VEDEGNYTC*LFVTFPQGSR	Hex(6)HexNAc(6)Fuc(1)NeuAc(1)	4846.95	4846.97	4	2.3	6.31	411.95	27.27
P15151	Poliovirus receptor	115	VEDEGNYTC*LFVTFPQGSR	Hex(6)HexNAc(6)Fuc(1)NeuAc(2)	5138.05	5138.05	3	0.8	6.83	466.95	10.97
P15151	Poliovirus receptor	115	VEDEGNYTC*LFVTFPQGSR	Hex(6)HexNAc(6)Fuc(1)NeuAc(3)	5429.14	5428.12	4	-4.6	8	495.22	391.17
P15151	Poliovirus receptor	115	VEDEGNYTC*LFVTFPQGSR	Hex(6)HexNAc(6)Fuc(2)	4701.92	4701.92	4	1.5	5.55	248.07	232.8
P15151	Poliovirus receptor	115	VEDEGNYTC*LFVTFPQGSR	Hex(6)HexNAc(6)Fuc(2)NeuAc(1)	4993.01	4992.02	4	1.9	7.09	469.67	268.06
P15151	Poliovirus receptor	115	VEDEGNYTC*LFVTFPQGSR	Hex(6)HexNAc(6)Fuc(2)NeuAc(2)	5284.11	5284.1	4	-1.9	6.72	470.53	59.23
P15151	Poliovirus receptor	115	VEDEGNYTC*LFVTFPQGSR	Hex(6)HexNAc(6)Fuc(3)	4847.97	4847	3	5	6.15	408.71	256.42
P15151	Poliovirus receptor	115	VEDEGNYTC*LFVTFPQGSR	Hex(6)HexNAc(6)Fuc(3)NeuAc(1)	5139.07	5138.08	4	2.2	5.8	278.24	201.5
P15151	Poliovirus receptor	115	VEDEGNYTC*LFVTFPQGSR	Hex(6)HexNAc(6)Fuc(4)	4994.03	4995.01	3	-4.6	5.66	328.02	202.06
P15151	Poliovirus receptor	115	VEDEGNYTC*LFVTFPQGSR	Hex(6)HexNAc(6)NeuAc(1)	4700.9	4701.91	3	1.7	7.1	541.37	31.03
P15151	Poliovirus receptor	115	VEDEGNYTC*LFVTFPQGSR	Hex(6)HexNAc(4)Fuc(3)	4441.82	4440.82	3	1.2	6.93	444.6	212.41
P15151	Poliovirus receptor	115	VEDEGNYTC*LFVTFPQGSR	Hex(7)HexNAc(6)Fuc(4)	5156.09	5157.09	4	0	2.21	207.57	135.56
P15151	Poliovirus receptor	115	VEDEGNYTC*LFVTFPQGSR	Hex(6)HexNAc(6)Fuc(4)NeuAc(1)	5285.13	5284.14	4	2.3	6.42	355.39	214.5
P15151	Poliovirus receptor	115	VEDEGNYTC*LFVTFPQGSR	Hex(6)HexNAc(6)Fuc(5)NeuAc(1)	5431.19	5430.2	3	3.7	6.11	350.54	164.6
P15151	Poliovirus receptor	115	VEDEGNYTC*LFVTFPQGSR	Hex(7)HexNAc(6)Fuc(4)NeuAc(1)	5447.18	5447.19	4	2.7	5.61	276.76	236.2
P15328	Folate receptor alpha	159	GWNWTSGFNK	Hex(5)HexNAc(5)	3022.21	3022.21	3	1.4	3.75	271.47	139.48
P15328	Folate receptor alpha	159	GWNWTSGFNK	Hex(5)HexNAc(5)Fuc(1)	3168.27	3168.26	3	-0.9	6.36	448.55	288.75
P15328	Folate receptor alpha	159	GWNWTSGFNK	Hex(5)HexNAc(5)Fuc(1)NeuAc(1)	3459.36	3459.37	3	2.1	6.65	553.39	330.27
P15328	Folate receptor alpha	159	GWNWTSGFNK	Hex(5)HexNAc(5)Fuc(1)NeuAc(2)	3750.46	3750.45	3	-1.3	6.11	437.88	231.65
P15328	Folate receptor alpha	159	GWNWTSGFNK	Hex(5)HexNAc(5)Fuc(2)	3314.33	3314.32	3	-0.8	5.65	334.37	189.14
P15328	Folate receptor alpha	159	GWNWTSGFNK	Hex(5)HexNAc(5)Fuc(2)NeuAc(1)	3605.42	3605.42	3	1.1	6.66	532.54	275.56
P15328	Folate receptor alpha	159	GWNWTSGFNK	Hex(5)HexNAc(5)Fuc(3)	3460.38	3460.4	3	3.6	5.65	366.76	184.41
P15328	Folate receptor alpha	159	GWNWTSGFNK	Hex(5)HexNAc(5)NeuAc(1)	3313.3	3313.3	3	0	5.92	356.89	207.4
P15328	Folate receptor alpha	159	GWNWTSGFNK	Hex(5)HexNAc(5)NeuAc(2)	3604.4	3604.41	2	1.8	6.14	411.36	225
P15328	Folate receptor alpha	159	GWNWTSGFNK	Hex(6)HexNAc(5)Fuc(2)	3476.38	3476.38	3	1.4	2.81	243.62	99.03
P15328	Folate receptor alpha	159	GWNWTSGFNK	Hex(6)HexNAc(5)Fuc(2)NeuAc(1)	3767.47	3767.48	3	2.1	4.99	280.38	131.24
P15328	Folate receptor alpha	159	GWNWTSGFNK	Hex(6)HexNAc(5)Fuc(3)	3622.44	3622.43	3	-2.5	2.44	235.83	90.28
P15328	Folate receptor alpha	159	GWNWTSGFNK	Hex(10)HexNAc(2)	3223.24	3223.22	3	-4.3	5.42	347.7	254.41
P15328	Folate receptor alpha	62	KNAC*C*STNTSQEAHKDVSYLYR	Hex(5)HexNAc(4)Fuc(1)	4400.83	4400.82	5	-0.7	5.07	326.01	97.61
P15328	Folate receptor alpha	62	KNAC*C*STNTSQEAHKDVSYLYR	Hex(5)HexNAc(5)Fuc(3)	4896.02	4895.03	4	3	5.06	333.27	153.21
P15328	Folate receptor alpha	63	N+AC*C*STNTSQEAHKDVSYLYR	Hex(5)HexNAc(4)Fuc(1)	4273.72	4272.71	3	-0.8	3.05	259.85	15.28
P15328	Folate receptor alpha	63	NAC*C*STNTSQEAHK	Hex(4)HexNAc(3)Fuc(1)NeuAc(1)	3302.26	3302.24	3	-4.6	5.11	318.44	174.51
P15328	Folate receptor alpha	63	NAC*C*STNTSQEAHK	Hex(4)HexNAc(4)Fuc(1)	3214.24	3214.24	3	0.5	6.92	514.32	348.94
P15328	Folate receptor alpha	63	NAC*C*STNTSQEAHK	Hex(4)HexNAc(5)Fuc(1)	3417.32	3417.32	3	0.7	6.74	503.73	286.2
P15328	Folate receptor alpha	63	NAC*C*STNTSQEAHK	Hex(4)HexNAc(5)Fuc(1)NeuAc(1)	3708.42	3708.41	3	-1.6	6.05	419.8	223.2
P15328	Folate receptor alpha	63	NAC*C*STNTSQEAHK	Hex(4)HexNAc(5)Fuc(2)	3563.38	3563.37	3	-2.5	4.2	247.91	137.3
P15328	Folate receptor alpha	63	NAC*C*STNTSQEAHK	Hex(5)HexNAc(4)Fuc(1)	3376.29	3376.29	3	-0.4	7.13	536.88	373.77
P15328	Folate receptor alpha	63	NAC*C*STNTSQEAHK	Hex(5)HexNAc(4)Fuc(1)NeuAc(1)	3667.39	3667.4	3	2.6	6.58	533.82	286.3
P15328	Folate receptor alpha	63	NAC*C*STNTSQEAHK	Hex(5)HexNAc(4)Fuc(2)	3522.35	3522.36	3	2.5	5.59	315.18	200.93
P15328	Folate receptor alpha	63	NAC*C*STNTSQEAHK	Hex(5)HexNAc(5)Fuc(1)	3579.37	3579.38	3	1.7	7.17	566.72	349.03
P15328	Folate receptor alpha	63	NAC*C*STNTSQEAHK	Hex(5)HexNAc(5)Fuc(1)NeuAc(1)	3870.47	3870.47	3	1.6	9.46	611.14	376.48
P15328	Folate receptor alpha	63	NAC*C*STNTSQEAHK	Hex(5)HexNAc(5)Fuc(1)NeuAc(2)	4161.56	4160.57	3	2.3	6.62	466.41	258.08
P15328	Folate receptor alpha	63	NAC*C*STNTSQEAHK	Hex(5)HexNAc(5)Fuc(2)	3725.43	3725.43	3	0.5	6.75	487.62	302.92
P15328	Folate receptor alpha	63	NAC*C*STNTSQEAHK	Hex(5)HexNAc(5)Fuc(2)NeuAc(1)	4016.53	4016.51	3	-3.2	5.87	365.22	89.58
P15328	Folate receptor alpha	63	NAC*C*STNTSQEAHK	Hex(6)HexNAc(4)	3392.29	3392.29	3	1.2	5.46	289.44	165.77
P15328	Folate receptor alpha	63	NAC*C*STNTSQEAHK	Hex(6)HexNAc(4)Fuc(1)	3538.35	3538.35	3	1.2	6.8	508.73	333.85
P15328	Folate receptor alpha	63	NAC*C*STNTSQEAHK	Hex(6)HexNAc(4)Fuc(1)NeuAc(1)	3829.44	3829.45	3	1.8	6.09	419.82	213.03
P15328	Folate receptor alpha	63	NAC*C*STNTSQEAHK	Hex(6)HexNAc(6)Fuc(2)	4090.56	4090.57	3	0.7	6.19	411.65	243.51
P15328	Folate receptor alpha	63	NAC*C*STNTSQEAHK	Hex(6)HexNAc(6)Fuc(3)	4236.62	4236.63	3	3.1	3.07	306.19	56.18
P15328	Folate receptor alpha	63	NAC*C*STNTSQEAHK	Hex(7)HexNAc(4)	3554.34	3554.35	3	2.8	3.88	259.08	98.38
P15328	Folate receptor alpha	63	NAC*C*STNTSQEAHKDVSYLYR	Hex(3)HexNAc(5)Fuc(1)	4151.71	4151.71	4	1.5	7.97	531.78	442.96
P15328	Folate receptor alpha	63	NAC*C*STNTSQEAHKDVSYLYR	Hex(4)HexNAc(3)Fuc(1)NeuAc(1)	4198.7	4198.69	4	-0.8	6.77	552.14	186.85
P15328	Folate receptor alpha	63	NAC*C*STNTSQEAHKDVSYLYR	Hex(4)HexNAc(4)Fuc(1)	4110.68	4110.68	4	0.6	12.35	742.58	168.38
P15328	Folate receptor alpha	63	NAC*C*STNTSQEAHKDVSYLYR	Hex(4)HexNAc(5)Fuc(1)	4313.76	4313.76	4	-0.8	11.23	692.1	202.31
P15328	Folate receptor alpha	63	NAC*C*STNTSQEAHKDVSYLYR	Hex(4)HexNAc(5)Fuc(1)NeuAc(1)	4604.85	4604.85	4	-0.4	13.27	757.23	84.9
P15328	Folate receptor alpha	63	NAC*C*STNTSQEAHKDVSYLYR	Hex(4)HexNAc(5)Fuc(2)	4459.82	4459.81	4	-1.6	5.74	375.58	23.81
P15328	Folate receptor alpha	63	NAC*C*STNTSQEAHKDVSYLYR	Hex(5)HexNAc(2)	3720.52	3720.51	4	-2.9	4.52	314.91	238.05
P15328	Folate receptor alpha	63	NAC*C*STNTSQEAHKDVSYLYR	Hex(5)HexNAc(3)Fuc(1)NeuAc(1)	4360.75	4361.76	4	1.7	5.91	336.02	261.7
P15328	Folate receptor alpha	63	NAC*C*STNTSQEAHKDVSYLYR	Hex(5)HexNAc(4)	4126.67	4125.67	4	-0.7	4.13	276.54	139.04
P15328	Folate receptor alpha	63	NAC*C*STNTSQEAHKDVSYLYR	Hex(5)HexNAc(4)Fuc(1)	4272.73	4272.73	4	-0.6	13.23	791.09	161.86
P15328	Folate receptor alpha	63	NAC*C*STNTSQEAHKDVSYLYR	Hex(5)HexNAc(4)Fuc(1)NeuAc(1)	4563.83	4563.83	4	0.7	12.35	737.39	88.21
P15328	Folate receptor alpha	63	NAC*C*STNTSQEAHKDVSYLYR	Hex(5)HexNAc(4)Fuc(2)	4418.79	4417.79	4	1.3	7.17	498.4	365.19
P15328	Folate receptor alpha	63	NAC*C*STNTSQEAHKDVSYLYR	Hex(5)HexNAc(4)Fuc(2)NeuAc(1)	4709.89	4709.88	4	-0.2	5.4	320.89	22.27
P15328	Folate receptor alpha	63	NAC*C*STNTSQEAHKDVSYLYR	Hex(5)HexNAc(4)Fuc(3)NeuAc(1)	4855.94	4855.97	4	4.4	3.06	272.26	162.07
P15328	Folate receptor alpha	63	NAC*C*STNTSQEAHKDVSYLYR	Hex(5)HexNAc(5)Fuc(1)	4475.81	4475.81	4	0.5	12.31	724.62	190.48
P15328	Folate receptor alpha	63	NAC*C*STNTSQEAHKDVSYLYR	Hex(5)HexNAc(5)Fuc(1)NeuAc(1)	4766.91	4766.91	4	0.2	12.31	743.53	124.46
P15328	Folate receptor alpha	63	NAC*C*STNTSQEAHKDVSYLYR	Hex(5)HexNAc(5)Fuc(1)NeuAc(2)	5058	5058.01	4	1.1	11.35	668.3	23.56
P15328	Folate receptor alpha	63	NAC*C*STNTSQEAHKDVSYLYR	Hex(5)HexNAc(5)Fuc(2)	4621.87	4621.87	4	0.4	8.07	586.78	54.62
P15328	Folate receptor alpha	63	NAC*C*STNTSQEAHKDVSYLYR	Hex(5)HexNAc(5)Fuc(2)NeuAc(1)	4912.97	4912.97	4	0.3	8.18	593.18	52.07
P15328	Folate receptor alpha	63	NAC*C*STNTSQEAHKDVSYLYR	Hex(5)HexNAc(5)Fuc(3)	4767.93	4768.91	4	-3.5	7.69	556.12	85.23
P15328	Folate receptor alpha	63	NAC*C*STNTSQEAHKDVSYLYR	Hex(5)HexNAc(5)Fuc(3)NeuAc(1)	5059.02	5058.04	4	3.4	4.41	284.76	166.67
P15328	Folate receptor alpha	63	NAC*C*STNTSQEAHKDVSYLYR	Hex(5)HexNAc(5)Fuc(4)	4913.99	4915	4	2.2	5.98	385.49	267.11
P15328	Folate receptor alpha	63	NAC*C*STNTSQEAHKDVSYLYR	Hex(5)HexNAc(6)	4532.83	4531.82	4	-3.2	5.63	325.84	175.39
P15328	Folate receptor alpha	63	NAC*C*STNTSQEAHKDVSYLYR	Hex(6)HexNAc(4)	4288.73	4288.73	4	1.3	6.57	503.65	294.44
P15328	Folate receptor alpha	63	NAC*C*STNTSQEAHKDVSYLYR	Hex(6)HexNAc(4)Fuc(1)	4434.79	4434.78	4	-0.1	10.14	685.27	73.15
P15328	Folate receptor alpha	63	NAC*C*STNTSQEAHKDVSYLYR	Hex(6)HexNAc(4)Fuc(1)NeuAc(1)	4725.88	4724.87	4	-0.6	7.07	575.2	266.36
P15328	Folate receptor alpha	63	NAC*C*STNTSQEAHKDVSYLYR	Hex(6)HexNAc(4)Fuc(2)	4580.84	4581.85	4	-0.2	6.22	448.57	100.63
P15328	Folate receptor alpha	63	NAC*C*STNTSQEAHKDVSYLYR	Hex(6)HexNAc(5)Fuc(1)NeuAc(1)	4928.96	4928.97	4	1.9	6.42	452.88	91.95
P15328	Folate receptor alpha	63	NAC*C*STNTSQEAHKDVSYLYR	Hex(6)HexNAc(5)Fuc(4)	5076.04	5077.03	4	-1.8	2.99	244.42	48.07
P15328	Folate receptor alpha	63	NAC*C*STNTSQEAHKDVSYLYR	Hex(6)HexNAc(5)NeuAc(2)	5074	5074.98	4	-4.2	5.44	340.9	80.89
P15328	Folate receptor alpha	63	NAC*C*STNTSQEAHKDVSYLYR	Hex(6)HexNAc(6)Fuc(1)	4840.94	4841.93	4	-4.2	2.38	228.57	82.73
P15328	Folate receptor alpha	63	NAC*C*STNTSQEAHKDVSYLYR	Hex(6)HexNAc(6)Fuc(1)NeuAc(1)	5132.04	5132.06	4	4.3	6.43	544.58	55.21
P15328	Folate receptor alpha	63	NAC*C*STNTSQEAHKDVSYLYR	Hex(6)HexNAc(6)Fuc(1)NeuAc(2)	5423.13	5423.16	4	3.8	6.32	519.11	33.42
P15328	Folate receptor alpha	63	NAC*C*STNTSQEAHKDVSYLYR	Hex(6)HexNAc(6)Fuc(2)	4987	4987.01	4	1.7	10.26	623.25	418.32
P15328	Folate receptor alpha	63	NAC*C*STNTSQEAHKDVSYLYR	Hex(6)HexNAc(6)Fuc(2)NeuAc(1)	5278.1	5278.12	4	4.2	6.1	483.76	50.47
P15328	Folate receptor alpha	63	NAC*C*STNTSQEAHKDVSYLYR	Hex(6)HexNAc(6)Fuc(2)NeuAc(2)	5569.19	5568.18	4	-2.5	6.44	482.48	44.07
P15328	Folate receptor alpha	63	NAC*C*STNTSQEAHKDVSYLYR	Hex(6)HexNAc(6)Fuc(3)	5133.06	5133.07	4	2.7	4.84	315.14	104.53
P15328	Folate receptor alpha	63	NAC*C*STNTSQEAHKDVSYLYR	Hex(6)HexNAc(6)Fuc(3)NeuAc(1)	5424.16	5425.14	4	-4	5.02	301.73	30.34
P15328	Folate receptor alpha	63	NAC*C*STNTSQEAHKDVSYLYR	Hex(6)HexNAc(6)Fuc(4)	5279.12	5278.13	4	3.4	5.68	338.9	147.03
P15328	Folate receptor alpha	63	NAC*C*STNTSQEAHKDVSYLYR	Hex(7)HexNAc(4)	4450.78	4449.77	4	-0.8	6.25	360.67	210.08
P15328	Folate receptor alpha	63	NAC*C*STNTSQEAHKDVSYLYR	Hex(7)HexNAc(4)Fuc(1)	4596.84	4596.83	4	-1.3	6.64	552.57	137.46
P15328	Folate receptor alpha	63	NAC*C*STNTSQEAHKDVSYLYR	Hex(7)HexNAc(4)Fuc(1)NeuAc(1)	4887.93	4887.93	4	0.1	6.13	436.4	76.84
P15328	Folate receptor alpha	63	NAC*C*STNTSQEAHKDVSYLYR	Hex(9)HexNAc(2)	4368.73	4368.74	4	2.2	6.03	412.95	303.78
P15328	Folate receptor alpha	63	NAC*C*STNTSQEAHKDVSYLYR	Hex(4)HexNAc(4)NeuAc(1)	4255.72	4256.7	4	-4.5	3.11	252.5	70.93
P15328	Folate receptor alpha	63	NAC*C*STNTSQEAHKDVSYLYR	Hex(5)HexNAc(6)Fuc(1)	4678.89	4678.9	4	1	5.5	301.63	69.05
P15328	Folate receptor alpha	63	NAC*C*STNTSQEAHKDVSYLYR	Hex(6)HexNAc(7)Fuc(2)	5190.08	5189.07	4	-1.1	4.13	226.3	29.98
P15328	Folate receptor alpha	63	NAC*C*STNTSQEAHKDVSYLYR	Hex(5)HexNAc(5)Fuc(4)NeuAc(1)	5205.08	5205.08	4	0.4	2	167.21	13.32
P15328	Folate receptor alpha	63	NAC*C*STNTSQEAHKDVSYLYR	Hex(7)HexNAc(7)Fuc(2)	5352.13	5352.14	4	0.6	6.59	501.44	76.09
P15328	Folate receptor alpha	63	NAC*C*STNTSQEAHKDVSYLYR	Hex(7)HexNAc(7)Fuc(1)NeuAc(1)	5497.17	5498.19	4	2.8	4.65	274.97	54.89
P15328	Folate receptor alpha	63	NAC*C*STNTSQEAHKDVSYLYR	Hex(7)HexNAc(7)Fuc(2)NeuAc(1)	5643.23	5643.24	4	2.3	5.58	330.64	59.29
P15328	Folate receptor alpha	63	NAC*C*STNTSQEAHKDVSYLYR	Hex(7)HexNAc(7)Fuc(4)	5644.25	5643.27	4	3.9	3.34	225.63	110.14
P15328	Folate receptor alpha	63	NAC*C*STNTSQEAHKDVSYLYR	Hex(2)HexNAc(2)	3234.36	3234.37	3	3.9	3.02	342.32	200.32
P15328	Folate receptor alpha	63	NAC*C*STNTSQEAHKDVSYLYR	Hex(10)HexNAc(2)	4530.78	4530.77	4	-1.5	5.75	356.28	74.13
P15328	Folate receptor alpha	199	VSNYSR	Hex(4)HexNAc(5)Fuc(1)NeuAc(1)	2826.12	2826.12	2	0.7	2.05	237.21	36.8
P15328	Folate receptor alpha	199	VSNYSR	Hex(5)HexNAc(4)Fuc(1)	2494	2494	3	1.2	2.16	229.77	53.22
P15328	Folate receptor alpha	199	VSNYSR	Hex(5)HexNAc(5)Fuc(1)NeuAc(2)	3279.27	3279.27	2	1.5	2.17	242.65	33.67
P15328	Folate receptor alpha	199	VSNYSR	Hex(5)HexNAc(5)Fuc(2)	2843.13	2843.13	2	-0.4	2.16	252.77	35.93
P15328	Folate receptor alpha	199	VSNYSR	Hex(5)HexNAc(5)Fuc(2)NeuAc(1)	3134.23	3134.23	2	-0.8	2.01	224.43	34.35
P15328	Folate receptor alpha	199	VSNYSR	Hex(10)HexNAc(2)	2752.04	2752.04	2	-0.5	2.03	269.27	14.74
P16422	Epithelial cell adhesion molecule	107	AK−QC*NGTSMC*WC*VNTAGVR	Hex(4)HexNAc(6)NeuAc(1)	4371.75	4370.75	4	0.5	2.19	190.01	65.87
P16422	Epithelial cell adhesion molecule	107	AK−QC*NGTSMC*WC*VNTAGVR	Hex(4)HexNAc(7)Fuc(1)NeuAc(1)	4720.89	4719.87	4	-3.3	4.04	233.67	149.74
P16422	Epithelial cell adhesion molecule	107	AK−QC*NGTSMC*WC*VNTAGVR	Hex(7)HexNAc(4)Fuc(2)NeuAc(1)	4743.87	4744.88	4	1.6	4.62	322.06	154.89
P16422	Epithelial cell adhesion molecule	107	AKQ+C*NGTSMC*WC*VNTAGVR	Hex(4)HexNAc(6)Fuc(3)	4505.8	4505.81	4	2.3	4.24	274.67	11.5
P16422	Epithelial cell adhesion molecule	107	AKQC*NGTSMC*WC*VNTAGVR	Hex(5)HexNAc(2)	3416.37	3416.38	3	0.5	5.82	358.22	191.09
P16422	Epithelial cell adhesion molecule	107	AKQC*NGTSMC*WC*VNTAGVR	Hex(6)HexNAc(2)	3578.43	3578.42	3	-1.6	4.35	271.8	104.5
P16422	Epithelial cell adhesion molecule	107	AKQC*NGTSMC*WC*VNTAGVR	Hex(5)HexNAc(7)NeuAc(1)	4722.87	4721.86	4	-0.2	2.48	222.63	100.6
P16422	Epithelial cell adhesion molecule	84	PEGALQNNDGLYDPDC*DESGLFKAKQ+C*NGTSMC*WC*VNTAGVR	Hex(6)HexNAc(5)Fuc(1)NeuAc(1)	7160.89	7160.86	6	-4.1	2	112.07	17.22
P16422	Epithelial cell adhesion molecule	109	Q+C*NGTSMC*WC*VNTAGVR	Hex(5)HexNAc(2)	3218.23	3218.23	2	1.8	6	324.84	172.49
P16422	Epithelial cell adhesion molecule	109	Q+C*NGTSMC*WC*VNTAGVR	Hex(8)HexNAc(2)	3704.38	3704.4	2	3.5	6.52	462.72	169.8
P16422	Epithelial cell adhesion molecule	109	Q+C*NGTSMC*WC*VNTAGVR	Hex(9)HexNAc(2)	3866.44	3866.44	3	1.7	6.16	357.11	160.16
P16422	Epithelial cell adhesion molecule	109	QC*NGTSMC*WC*VNTAGVR	Hex(5)HexNAc(2)	3217.24	3217.25	3	1.3	14.48	831.16	688.37
P16422	Epithelial cell adhesion molecule	109	QC*NGTSMC*WC*VNTAGVR	Hex(5)HexNAc(4)	3623.4	3623.39	3	-1.9	6.36	434.35	277.72
P16422	Epithelial cell adhesion molecule	109	QC*NGTSMC*WC*VNTAGVR	Hex(6)HexNAc(2)	3379.3	3379.3	3	1.8	11.45	687.03	598.5
P16422	Epithelial cell adhesion molecule	109	QC*NGTSMC*WC*VNTAGVR	Hex(6)HexNAc(3)	3582.37	3582.36	3	-3.3	5.9	413.72	282.12
P16422	Epithelial cell adhesion molecule	109	QC*NGTSMC*WC*VNTAGVR	Hex(7)HexNAc(2)	3541.35	3541.35	3	0.5	13.5	791.81	678.47
P16422	Epithelial cell adhesion molecule	109	QC*NGTSMC*WC*VNTAGVR	Hex(8)HexNAc(2)	3703.4	3703.4	3	0.5	12.5	725.79	540.06
P16422	Epithelial cell adhesion molecule	109	QC*NGTSMC*WC*VNTAGVR	Hex(9)HexNAc(2)	3865.45	3865.45	3	-1.2	6.7	472.68	355.49
P16422	Epithelial cell adhesion molecule	109	QC*NGTSMC*WC*VNTAGVR	Hex(5)HexNAc(7)Fuc(2)	4524.75	4525.76	4	-0.4	9.55	595.74	242.94
P16444	Dipeptidase 1	278	ANLSQVADHLDHIK	Hex(5)HexNAc(4)Fuc(1)NeuAc(1)	3620.55	3620.56	4	3.4	5.8	389.74	181.63
P16444	Dipeptidase 1	278	ANLSQVADHLDHIK	Hex(5)HexNAc(5)Fuc(1)	3532.53	3532.53	4	0.7	6.1	391.22	184.7
P16444	Dipeptidase 1	278	ANLSQVADHLDHIK	Hex(6)HexNAc(5)Fuc(1)NeuAc(2)	4276.78	4277.79	4	1.6	2.05	230.07	19.35
P16444	Dipeptidase 1	278	ANLSQVADHLDHIK	Hex(6)HexNAc(5)Fuc(2)NeuAc(1)	4131.74	4131.74	4	1.1	6.04	384.15	60.98
P16444	Dipeptidase 1	278	ANLSQVADHLDHIK	Hex(6)HexNAc(6)Fuc(1)	3897.66	3897.65	4	-4.6	4.29	270.55	135.49
P16444	Dipeptidase 1	56	ANLTTLAGTHTNIPK	Hex(4)HexNAc(5)Fuc(1)	3361.51	3361.51	3	-0.7	2.64	287.84	61.02
P16444	Dipeptidase 1	56	ANLTTLAGTHTNIPK	Hex(4)HexNAc(5)Fuc(1)NeuAc(1)	3652.61	3652.61	3	-0.9	5.97	440.18	104.72
P16444	Dipeptidase 1	56	ANLTTLAGTHTNIPK	Hex(5)HexNAc(5)Fuc(1)	3523.57	3523.57	3	-0.1	4.35	371.47	65.92
P16444	Dipeptidase 1	56	ANLTTLAGTHTNIPK	Hex(6)HexNAc(6)Fuc(1)NeuAc(1)	4179.8	4179.79	3	-0.5	4.97	336.66	66.31
P16444	Dipeptidase 1	56	ANLTTLAGTHTNIPK	Hex(6)HexNAc(6)Fuc(1)NeuAc(2)	4470.89	4470.91	4	3.3	2.53	257.94	34.46
P16444	Dipeptidase 1	56	ANLTTLAGTHTNIPK	Hex(8)HexNAc(2)	3254.43	3254.43	3	-0.1	5.03	289.32	97.67
P16444	Dipeptidase 1	349	VFEAVEQASNLTQ+APEEEPIPLDQLGGSC*R	Hex(4)HexNAc(5)Fuc(1)	5095.22	5096.2	4	-5.1	2	146.19	18.66
P16444	Dipeptidase 1	349	VFEAVEQASNLTQAPEEEPIPLDQLGGSC*R	Hex(5)HexNAc(5)Fuc(1)NeuAc(1)	5547.39	5547.38	4	-1.5	8.46	518.1	40.28
P17301	Integrin alpha-2	1069	GEYFVNVTTR	Hex(6)HexNAc(3)NeuAc(1)	3058.24	3058.24	3	0.4	5.67	325.33	145.62
P17301	Integrin alpha-2	1069	GEYFVNVTTR	Hex(7)HexNAc(2)	2726.12	2726.12	2	1	4.4	288.34	134.55
P17301	Integrin alpha-2	1069	GEYFVNVTTR	Hex(8)HexNAc(2)	2888.17	2888.16	2	-4.4	3.3	299.38	144.02
P17301	Integrin alpha-2	111	TNMSLGLILTR	Hex(9)HexNAc(2)	3083.32	3083.33	3	1.1	9.06	620.51	337.21
P17301	Integrin alpha-2	340	YFFNVSDEAALLEK	Hex(5)HexNAc(5)NeuAc(2)	4053.66	4052.68	3	4.8	5.15	344.16	116.98
P19075	Tetraspanin-8	116	IVNETLYENTK	Hex(4)HexNAc(5)Fuc(1)	3133.35	3133.36	3	3.4	4.64	335.93	184.63
P19075	Tetraspanin-8	116	IVNETLYENTK	Hex(5)HexNAc(5)Fuc(1)NeuAc(1)	3586.49	3586.5	3	1.7	6.44	474.33	281.59
P19075	Tetraspanin-8	116	IVNETLYENTK	Hex(5)HexNAc(5)Fuc(1)NeuAc(2)	3877.59	3877.59	3	0.2	6.59	514.73	283.41
P19075	Tetraspanin-8	116	IVNETLYENTK	Hex(5)HexNAc(6)Fuc(1)NeuAc(2)	4080.67	4080.66	3	-1.2	4.69	261.81	131.73
P19075	Tetraspanin-8	116	IVNETLYENTK	Hex(6)HexNAc(6)Fuc(1)NeuAc(2)	4242.72	4242.73	3	1.3	6.31	436.04	22.81
P19075	Tetraspanin-8	116	IVNETLYENTK	Hex(6)HexNAc(6)Fuc(2)NeuAc(1)	4097.68	4097.68	3	-0.2	2.83	251.29	27.02
P19075	Tetraspanin-8	116	IVNETLYENTK	Hex(7)HexNAc(2)	2864.21	2864.22	2	3.3	2.65	243.67	109.66
P19075	Tetraspanin-8	116	IVNETLYENTK	Hex(8)HexNAc(2)	3026.26	3026.25	2	-4.3	5.63	416.36	254.15
P19075	Tetraspanin-8	116	IVNETLYENTK	Hex(9)HexNAc(2)	3188.31	3188.32	2	2	6.11	419.5	251.84
P21860	Receptor tyrosine-protein kinase erbB-3	340	FQTVDSSNIDGFVNC*TK	Hex(5)HexNAc(4)Fuc(1)NeuAc(1)	3991.62	3991.61	3	-1.9	7.99	582.44	291.52
P21860	Receptor tyrosine-protein kinase erbB-3	340	FQTVDSSNIDGFVNC*TK	Hex(5)HexNAc(5)Fuc(1)NeuAc(1)	4194.69	4194.7	3	1.5	6.63	450.28	67.71
P21860	Receptor tyrosine-protein kinase erbB-3	340	FQTVDSSNIDGFVNC*TK	Hex(7)HexNAc(2)	3472.41	3472.4	3	-2.2	9.15	592.52	434.05
P21860	Receptor tyrosine-protein kinase erbB-3	340	FQTVDSSNIDGFVNC*TK	Hex(9)HexNAc(2)	3796.51	3796.53	3	3.3	6.93	564.57	332.49
P21860	Receptor tyrosine-protein kinase erbB-3	248	HFNDSGAC*VPR	Hex(5)HexNAc(3)NeuAc(1)	2970.16	2970.15	3	-0.9	5.98	345.85	203.02
P21860	Receptor tyrosine-protein kinase erbB-3	248	HFNDSGAC*VPR	Hex(5)HexNAc(4)NeuAc(2)	3464.33	3464.34	3	1.9	2.3	217.66	90.41
P21860	Receptor tyrosine-protein kinase erbB-3	248	HFNDSGAC*VPR	Hex(6)HexNAc(2)	2638.03	2638.04	3	2.3	6.42	475.01	288.93
P21860	Receptor tyrosine-protein kinase erbB-3	248	HFNDSGAC*VPR	Hex(6)HexNAc(3)NeuAc(1)	3132.21	3132.22	3	4.6	2.45	262.33	36.77
P21860	Receptor tyrosine-protein kinase erbB-3	248	HFNDSGAC*VPR	Hex(7)HexNAc(2)	2800.09	2800.09	3	0.6	7.09	540.72	356.02
P21860	Receptor tyrosine-protein kinase erbB-3	248	HFNDSGAC*VPR	Hex(8)HexNAc(2)	2962.14	2962.14	3	-1.6	6.05	415.38	293.92
P21860	Receptor tyrosine-protein kinase erbB-3	248	HFNDSGAC*VPR	Hex(9)HexNAc(2)	3124.19	3124.19	3	-2.3	6.46	500.03	309.62
P21860	Receptor tyrosine-protein kinase erbB-3	435	NLNVTSLGFR	Hex(5)HexNAc(5)NeuAc(1)	3237.37	3237.38	3	2.7	5.24	346.76	133.42
P21860	Receptor tyrosine-protein kinase erbB-3	435	NLNVTSLGFR	Hex(5)HexNAc(5)NeuAc(2)	3528.46	3528.46	3	0.1	3.06	241.97	79.26
P23229	Integrin alpha-6	322	ANHSGAVVLLK	Hex(6)HexNAc(2)	2487.12	2487.12	3	-0.5	7.03	502.12	377.34
P23229	Integrin alpha-6	322	ANHSGAVVLLK	Hex(8)HexNAc(2)	2811.23	2811.23	3	0.1	8.11	523.75	423.18
P23229	Integrin alpha-6	961	KYQTLNC*SVNVNC*VNIR	Hex(6)HexNAc(2)	3460.5	3460.49	3	-1.3	8.28	580.6	347.94
P23229	Integrin alpha-6	961	KYQTLNC*SVNVNC*VNIR	Hex(6)HexNAc(3)NeuAc(1)	3954.67	3954.68	3	2.4	6.02	402.91	179.44
P23229	Integrin alpha-6	408	LNGTK	Hex(9)HexNAc(2)	2396.94	2396.94	2	-2.1	2.36	331.12	20
P23229	Integrin alpha-6	995	LWNSTFLEEYSK	Hex(9)HexNAc(2)	3381.37	3381.37	3	1.7	11.27	698.31	398.48
P23229	Integrin alpha-6	762	QLSC*VANQNGSQADC*ELGNPFKR	Hex(5)HexNAc(4)Fuc(1)NeuAc(1)	4652.92	4652.92	3	-1	6.08	442.28	108.4
P23470	Receptor-type tyrosine-protein phosphatase gamma	148	VEFHWGHSNGSAGSEHSINGR	Hex(5)HexNAc(5)Fuc(1)NeuAc(1)	4527.83	4527.84	5	1.7	3.84	288.65	45.36
P25092	Heat-stable enterotoxin receptor	338	IFLEN+GENITTPK	Hex(9)HexNAc(2)	3341.39	3341.39	3	-0.9	6.33	459.61	246.3
P25092	Heat-stable enterotoxin receptor	338	IFLENGENITTPK	Hex(8)HexNAc(2)	3178.36	3178.36	3	3	6.24	483.35	249.41
P25092	Heat-stable enterotoxin receptor	338	IFLENGENITTPK	Hex(9)HexNAc(2)	3340.41	3340.41	3	1.6	7.09	576.7	353.63
P25092	Heat-stable enterotoxin receptor	393	VLLTYDTHVNK	Hex(8)HexNAc(2)	3005.29	3005.29	3	-0.3	10.39	613.13	385.66
P25092	Heat-stable enterotoxin receptor	393	VLLTYDTHVNK	Hex(9)HexNAc(2)	3167.34	3167.34	3	0.2	10.42	648.42	421.26
P25092	Heat-stable enterotoxin receptor	393	VLLTYDTHVNK	Hex(10)HexNAc(2)	3329.39	3329.39	3	0.4	2.65	251.24	72.93
P26006	Integrin alpha-3	650	K−LLLSINVTNTRTSER	Hex(9)HexNAc(2)	3723.7	3723.72	4	4.8	2	197.68	197.68
P26006	Integrin alpha-3	265	NITIVTGAPR	Hex(5)HexNAc(5)	2867.27	2867.27	3	0.9	4.68	247.21	128.52
P26006	Integrin alpha-3	590	SLDAYPILNQAQALENHTEVQFQK	Hex(8)HexNAc(2)	4459.97	4459.97	3	0.3	5.92	448.57	115.55
P26006	Integrin alpha-3	933	VWNSTFIEDYRDFDR	Hex(9)HexNAc(2)	3827.53	3827.54	3	1.2	6.33	452.26	299.84
P26927	Hepatocyte growth factor-like protein	293	GTANTTTAGVPC*QR	Hex(9)HexNAc(2)	3298.31	3298.3	3	-3.6	5.77	392.52	267.85
P26927	Hepatocyte growth factor-like protein	612	GTGNDTVLNVALLNVISNQEC*NIK	Hex(7)HexNAc(2)	4126.85	4126.85	3	0.8	7.18	491.16	363.18
P26927	Hepatocyte growth factor-like protein	612	GTGNDTVLNVALLNVISNQEC*NIK	Hex(8)HexNAc(2)	4288.9	4288.91	3	2.4	8.26	560.13	392.25
P26927	Hepatocyte growth factor-like protein	612	GTGNDTVLNVALLNVISNQEC*NIK	Hex(9)HexNAc(2)	4450.95	4450.95	3	-0.9	6.8	457.33	154.78
P26927	Hepatocyte growth factor-like protein	612	GTGNDTVLNVALLNVISNQEC*NIK	Hex(10)HexNAc(2)	4613.01	4612	3	-0.2	2.49	217.75	115.64
P27487	Dipeptidyl peptidase 4	148	IPNNTQWVTWSPVGHK	Hex(5)HexNAc(4)Fuc(1)NeuAc(2)	4214.78	4213.77	4	-1.2	6.07	348.29	174.66
P27487	Dipeptidyl peptidase 4	148	IPNNTQWVTWSPVGHK	Hex(5)HexNAc(5)Fuc(1)	3835.67	3835.66	3	-2.8	4.94	417.75	212.5
P27487	Dipeptidyl peptidase 4	148	IPNNTQWVTWSPVGHK	Hex(5)HexNAc(5)Fuc(1)NeuAc(1)	4126.76	4126.77	3	2.4	5.68	476.29	125.15
P27487	Dipeptidyl peptidase 4	148	IPNNTQWVTWSPVGHK	Hex(5)HexNAc(5)Fuc(1)NeuAc(2)	4417.86	4417.86	3	-0.3	6.99	547.55	60.41
P27487	Dipeptidyl peptidase 4	148	IPNNTQWVTWSPVGHK	Hex(5)HexNAc(5)Fuc(2)NeuAc(1)	4272.82	4271.82	3	-0.4	6.9	521.32	57.97
P27487	Dipeptidyl peptidase 4	148	IPNNTQWVTWSPVGHK	Hex(5)HexNAc(5)Fuc(3)	4127.78	4126.79	3	1.5	5.49	400.4	196.2
P27487	Dipeptidyl peptidase 4	148	IPNNTQWVTWSPVGHK	Hex(5)HexNAc(5)NeuAc(2)	4271.8	4271.8	3	-1.5	4.64	401.21	115.89
P27487	Dipeptidyl peptidase 4	148	IPNNTQWVTWSPVGHK	Hex(6)HexNAc(5)Fuc(1)NeuAc(1)	4288.82	4287.81	3	-1	3.77	349.25	62.36
P27487	Dipeptidyl peptidase 4	148	IPNNTQWVTWSPVGHK	Hex(6)HexNAc(5)Fuc(1)NeuAc(2)	4579.91	4579.92	3	1.2	6.92	527.03	66.99
P27487	Dipeptidyl peptidase 4	148	IPNNTQWVTWSPVGHK	Hex(6)HexNAc(5)Fuc(1)NeuAc(3)	4871.01	4871.02	3	1.7	5.69	375.75	22.75
P27487	Dipeptidyl peptidase 4	148	IPNNTQWVTWSPVGHK	Hex(6)HexNAc(5)Fuc(2)NeuAc(1)	4434.88	4434.88	3	1.7	5.85	440.46	94.31
P27487	Dipeptidyl peptidase 4	148	IPNNTQWVTWSPVGHK	Hex(6)HexNAc(5)Fuc(2)NeuAc(2)	4725.97	4726.99	3	2.5	6.38	483.77	44.96
P27487	Dipeptidyl peptidase 4	148	IPNNTQWVTWSPVGHK	Hex(6)HexNAc(5)Fuc(3)NeuAc(1)	4580.93	4579.95	3	4.4	4.02	287.34	121.26
P27487	Dipeptidyl peptidase 4	148	IPNNTQWVTWSPVGHK	Hex(6)HexNAc(5)Fuc(4)	4435.9	4436.89	4	-1.9	4.66	321.1	93.99
P27487	Dipeptidyl peptidase 4	148	IPNNTQWVTWSPVGHK	Hex(6)HexNAc(5)NeuAc(2)	4433.85	4434.85	3	-0.8	2.35	289.78	29.73
P27487	Dipeptidyl peptidase 4	148	IPNNTQWVTWSPVGHK	Hex(6)HexNAc(6)Fuc(1)NeuAc(1)	4491.9	4490.87	3	-4.3	5.56	428.05	96.21
P27487	Dipeptidyl peptidase 4	148	IPNNTQWVTWSPVGHK	Hex(6)HexNAc(6)Fuc(1)NeuAc(2)	4782.99	4783.01	4	2.8	6.44	462.27	23.61
P27487	Dipeptidyl peptidase 4	148	IPNNTQWVTWSPVGHK	Hex(6)HexNAc(6)Fuc(1)NeuAc(3)	5074.09	5074.1	3	1.7	6.84	505.51	28.2
P27487	Dipeptidyl peptidase 4	148	IPNNTQWVTWSPVGHK	Hex(6)HexNAc(6)Fuc(2)	4346.86	4346.86	3	1	5.87	450.46	169.26
P27487	Dipeptidyl peptidase 4	148	IPNNTQWVTWSPVGHK	Hex(6)HexNAc(6)Fuc(2)NeuAc(1)	4637.95	4637.95	3	-1.5	6.4	449.69	44.95
P27487	Dipeptidyl peptidase 4	148	IPNNTQWVTWSPVGHK	Hex(6)HexNAc(6)Fuc(2)NeuAc(2)	4929.05	4928.06	3	3.4	6.93	537.5	234.86
P27487	Dipeptidyl peptidase 4	148	IPNNTQWVTWSPVGHK	Hex(6)HexNAc(6)Fuc(3)NeuAc(1)	4784.01	4784.02	3	1.2	5.91	387	109.21
P27487	Dipeptidyl peptidase 4	148	IPNNTQWVTWSPVGHK	Hex(6)HexNAc(6)Fuc(3)NeuAc(2)	5075.11	5074.11	4	1.9	6.73	422.58	238.18
P27487	Dipeptidyl peptidase 4	148	IPNNTQWVTWSPVGHK	Hex(6)HexNAc(6)NeuAc(1)	4345.84	4346.84	3	0.3	4.09	351.83	12.3
P27487	Dipeptidyl peptidase 4	148	IPNNTQWVTWSPVGHK	Hex(6)HexNAc(6)NeuAc(2)	4636.93	4637.92	3	-3	5.58	438.25	151.95
P27487	Dipeptidyl peptidase 4	148	IPNNTQWVTWSPVGHK	Hex(6)HexNAc(7)Fuc(3)NeuAc(2)	5278.19	5279.19	4	-0.5	2.52	228.32	19.06
P27487	Dipeptidyl peptidase 4	148	IPNNTQWVTWSPVGHK	Hex(7)HexNAc(6)Fuc(2)NeuAc(1)	4800.01	4801.02	4	2.6	2.6	250.34	23.5
P27487	Dipeptidyl peptidase 4	148	IPNNTQWVTWSPVGHK	Hex(7)HexNAc(6)Fuc(2)NeuAc(2)	5091.1	5092.1	4	-1.3	6.09	403.84	15.42
P27487	Dipeptidyl peptidase 4	148	IPNNTQWVTWSPVGHK	Hex(8)HexNAc(2)	3566.53	3566.53	3	0.7	5.74	442.82	191.52
P27487	Dipeptidyl peptidase 4	148	IPNNTQWVTWSPVGHK	Hex(9)HexNAc(2)	3728.58	3728.6	3	3.5	6.13	410.09	207.3
P27487	Dipeptidyl peptidase 4	148	IPNNTQWVTWSPVGHK	Hex(6)HexNAc(5)Fuc(4)NeuAc(1)	4726.99	4726.01	3	5.3	6.18	365.73	201.48
P27487	Dipeptidyl peptidase 4	148	IPNNTQWVTWSPVGHK	Hex(6)HexNAc(6)Fuc(5)	4785.03	4786.05	3	2	2.16	185.39	87.44
P27487	Dipeptidyl peptidase 4	148	IPNNTQWVTWSPVGHK	Hex(7)HexNAc(6)Fuc(3)NeuAc(1)	4946.07	4945.09	4	4.7	6.13	410.39	239.46
P27487	Dipeptidyl peptidase 4	148	IPNNTQWVTWSPVGHK	Hex(7)HexNAc(6)Fuc(5)	4947.09	4948.07	4	-3	6.14	383.29	156.63
P27487	Dipeptidyl peptidase 4	148	IPNNTQWVTWSPVGHK	Hex(6)HexNAc(7)Fuc(1)NeuAc(2)	4986.07	4986.07	4	-0.4	2.21	222.59	29.38
P27487	Dipeptidyl peptidase 4	148	IPNNTQWVTWSPVGHK	Hex(7)HexNAc(7)NeuAc(2)	5002.07	5003.06	4	-2.1	3.37	288.06	53.06
P27487	Dipeptidyl peptidase 4	148	IPNNTQWVTWSPVGHK	Hex(7)HexNAc(7)Fuc(2)NeuAc(1)	5003.09	5003.11	4	3.7	2.2	226.59	50.82
P27487	Dipeptidyl peptidase 4	148	IPNNTQWVTWSPVGHK	Hex(6)HexNAc(6)Fuc(5)NeuAc(1)	5076.13	5076.14	4	2.1	3.48	289.64	107.13
P27487	Dipeptidyl peptidase 4	148	IPNNTQWVTWSPVGHK	Hex(7)HexNAc(6)Fuc(4)NeuAc(1)	5092.12	5091.13	4	2.7	6.6	421.76	221.7
P27487	Dipeptidyl peptidase 4	148	IPNNTQWVTWSPVGHK	Hex(6)HexNAc(7)NeuAc(3)	5131.11	5130.11	4	0.5	5.5	299.96	131.95
P27487	Dipeptidyl peptidase 4	148	IPNNTQWVTWSPVGHK	Hex(7)HexNAc(7)Fuc(1)NeuAc(2)	5148.12	5147.12	4	-0.9	2.16	233.38	29.99
P27487	Dipeptidyl peptidase 4	148	IPNNTQWVTWSPVGHK	Hex(7)HexNAc(7)Fuc(3)NeuAc(1)	5149.14	5148.16	4	2.9	3.7	273.55	89.61
P27487	Dipeptidyl peptidase 4	148	IPNNTQWVTWSPVGHK	Hex(6)HexNAc(6)Fuc(2)NeuAc(3)	5220.15	5219.13	3	-1.9	5.41	313.69	108.86
P27487	Dipeptidyl peptidase 4	148	IPNNTQWVTWSPVGHK	Hex(7)HexNAc(6)Fuc(1)NeuAc(3)	5236.14	5236.14	3	-0.3	6.36	417.41	51.05
P27487	Dipeptidyl peptidase 4	148	IPNNTQWVTWSPVGHK	Hex(7)HexNAc(6)Fuc(3)NeuAc(2)	5237.16	5236.16	4	1.4	6.45	409.72	19.9
P27487	Dipeptidyl peptidase 4	148	IPNNTQWVTWSPVGHK	Hex(6)HexNAc(7)Fuc(1)NeuAc(3)	5277.17	5278.16	3	-1.6	6.4	455.07	31.43
P27487	Dipeptidyl peptidase 4	148	IPNNTQWVTWSPVGHK	Hex(7)HexNAc(7)Fuc(2)NeuAc(2)	5294.18	5293.19	4	1.9	2.14	229.48	26.41
P27487	Dipeptidyl peptidase 4	148	IPNNTQWVTWSPVGHK	Hex(7)HexNAc(6)Fuc(2)NeuAc(3)	5382.2	5381.21	4	2	5.09	271.95	112.53
P27487	Dipeptidyl peptidase 4	148	IPNNTQWVTWSPVGHK	Hex(7)HexNAc(7)Fuc(5)NeuAc(1)	5441.26	5441.27	4	1.8	4.34	279.1	176.1
P27487	Dipeptidyl peptidase 4	148	IPNNTQWVTWSPVGHK	Hex(6)HexNAc(6)Fuc(5)NeuAc(3)	5658.32	5658.3	4	-4.1	2.51	238.45	70.72
P27487	Dipeptidyl peptidase 4	148	IPNNTQWVTWSPVGHK	Hex(10)HexNAc(2)	3890.64	3890.64	3	0.7	5.83	350.76	126.87
P27487	Dipeptidyl peptidase 4	319	IQ+NYSVMDIC*DYDESSGR	Hex(6)HexNAc(4)Fuc(1)	4083.57	4083.57	4	-1.7	2.19	201.67	66.98
P27487	Dipeptidyl peptidase 4	319	IQNYSVMDIC*DYDESSGR	Hex(4)HexNAc(4)Fuc(2)NeuAc(1)	4195.64	4196.65	3	3	3.04	240.53	61
P27487	Dipeptidyl peptidase 4	319	IQNYSVMDIC*DYDESSGR	Hex(5)HexNAc(4)Fuc(2)NeuAc(1)	4357.69	4356.69	3	2.1	6.47	372.43	210.34
P27487	Dipeptidyl peptidase 4	319	IQNYSVMDIC*DYDESSGR	Hex(5)HexNAc(4)NeuAc(1)	4065.57	4065.56	3	-3.8	6.22	491.68	161.25
P27487	Dipeptidyl peptidase 4	319	IQNYSVMDIC*DYDESSGR	Hex(5)HexNAc(4)NeuAc(2)	4356.67	4355.68	3	3.2	6.51	426.57	265.6
P27487	Dipeptidyl peptidase 4	319	IQNYSVMDIC*DYDESSGR	Hex(5)HexNAc(5)NeuAc(1)	4268.65	4269.67	3	2.8	6.66	504.21	54.06
P27487	Dipeptidyl peptidase 4	319	IQNYSVMDIC*DYDESSGR	Hex(5)HexNAc(5)NeuAc(2)	4559.75	4560.74	4	-1.5	6.41	423.6	80.66
P27487	Dipeptidyl peptidase 4	319	IQNYSVMDIC*DYDESSGR	Hex(6)HexNAc(3)	3733.45	3733.46	3	1.8	6.21	363.78	217.2
P27487	Dipeptidyl peptidase 4	319	IQNYSVMDIC*DYDESSGR	Hex(6)HexNAc(3)Fuc(1)	3879.51	3879.52	3	3.6	4.59	259.52	139.7
P27487	Dipeptidyl peptidase 4	319	IQNYSVMDIC*DYDESSGR	Hex(6)HexNAc(3)Fuc(2)	4025.57	4024.58	3	3.8	6.1	411.28	218.59
P27487	Dipeptidyl peptidase 4	319	IQNYSVMDIC*DYDESSGR	Hex(6)HexNAc(3)NeuAc(1)	4024.55	4024.55	3	1.8	11.45	692.28	48.9
P27487	Dipeptidyl peptidase 4	319	IQNYSVMDIC*DYDESSGR	Hex(6)HexNAc(4)Fuc(1)	4082.59	4082.59	3	0.5	5.71	308.95	124.56
P27487	Dipeptidyl peptidase 4	319	IQNYSVMDIC*DYDESSGR	Hex(6)HexNAc(4)Fuc(1)NeuAc(1)	4373.68	4373.69	4	2.2	7.11	569.07	28.21
P27487	Dipeptidyl peptidase 4	319	IQNYSVMDIC*DYDESSGR	Hex(6)HexNAc(4)NeuAc(1)	4227.63	4228.64	3	1.7	6.6	450.34	41.98
P27487	Dipeptidyl peptidase 4	319	IQNYSVMDIC*DYDESSGR	Hex(6)HexNAc(5)Fuc(1)	4285.67	4284.65	3	-2.7	3.75	225.11	80.48
P27487	Dipeptidyl peptidase 4	319	IQNYSVMDIC*DYDESSGR	Hex(6)HexNAc(5)Fuc(2)	4431.73	4432.75	4	3.9	5.27	294.48	163.89
P27487	Dipeptidyl peptidase 4	319	IQNYSVMDIC*DYDESSGR	Hex(7)HexNAc(4)Fuc(1)	4244.64	4243.64	3	0.7	2.54	235.04	37.87
P27487	Dipeptidyl peptidase 4	319	IQNYSVMDIC*DYDESSGR	Hex(7)HexNAc(4)NeuAc(1)	4389.68	4390.68	3	-0.2	9.22	637.78	64.19
P27487	Dipeptidyl peptidase 4	319	IQNYSVMDIC*DYDESSGR	Hex(6)HexNAc(4)Fuc(3)	4374.7	4373.72	3	3.4	7.19	564.56	336.97
P27487	Dipeptidyl peptidase 4	319	IQNYSVMDIC*DYDESSGR	Hex(7)HexNAc(5)Fuc(1)	4447.72	4446.73	4	2.7	2.39	160.34	83.08
P27487	Dipeptidyl peptidase 4	513	KLDFIILNETK	Hex(4)HexNAc(3)Fuc(1)NeuAc(1)	3028.38	3028.37	3	-0.3	9.16	619.32	339.76
P27487	Dipeptidyl peptidase 4	513	KLDFIILNETK	Hex(4)HexNAc(5)Fuc(1)NeuAc(1)	3434.53	3434.55	3	4.6	2.98	286.07	134.06
P27487	Dipeptidyl peptidase 4	513	KLDFIILNETK	Hex(5)HexNAc(3)Fuc(1)	2899.33	2899.33	3	-2.2	5.9	363.09	292.51
P27487	Dipeptidyl peptidase 4	513	KLDFIILNETK	Hex(5)HexNAc(3)Fuc(1)NeuAc(1)	3190.43	3190.43	3	1.3	9.27	622.68	355.77
P27487	Dipeptidyl peptidase 4	513	KLDFIILNETK	Hex(5)HexNAc(4)Fuc(1)	3102.41	3102.41	3	0.3	6.44	425.82	264.94
P27487	Dipeptidyl peptidase 4	513	KLDFIILNETK	Hex(5)HexNAc(4)Fuc(1)NeuAc(1)	3393.51	3393.51	3	0.6	7.41	560.77	369.83
P27487	Dipeptidyl peptidase 4	513	KLDFIILNETK	Hex(5)HexNAc(4)Fuc(1)NeuAc(2)	3684.6	3684.61	3	1.1	6.8	513.91	326.92
P27487	Dipeptidyl peptidase 4	513	KLDFIILNETK	Hex(5)HexNAc(4)Fuc(2)	3248.47	3248.47	3	0.1	6.7	468.88	318.9
P27487	Dipeptidyl peptidase 4	513	KLDFIILNETK	Hex(5)HexNAc(4)Fuc(2)NeuAc(1)	3539.57	3539.57	3	2.1	6.81	493.75	355.27
P27487	Dipeptidyl peptidase 4	513	KLDFIILNETK	Hex(5)HexNAc(4)Fuc(3)	3394.53	3394.53	3	1.2	6.7	460.76	322.88
P27487	Dipeptidyl peptidase 4	513	KLDFIILNETK	Hex(5)HexNAc(4)Fuc(3)NeuAc(1)	3685.62	3685.63	3	2	7.12	527.91	372.64
P27487	Dipeptidyl peptidase 4	513	KLDFIILNETK	Hex(5)HexNAc(5)Fuc(1)	3305.49	3305.5	3	1.5	9.27	615.18	357.93
P27487	Dipeptidyl peptidase 4	513	KLDFIILNETK	Hex(5)HexNAc(5)Fuc(1)NeuAc(1)	3596.59	3596.59	3	0.7	7.44	577.55	373.1
P27487	Dipeptidyl peptidase 4	513	KLDFIILNETK	Hex(5)HexNAc(5)Fuc(1)NeuAc(2)	3887.68	3887.69	3	0.9	7.25	560.74	348.68
P27487	Dipeptidyl peptidase 4	513	KLDFIILNETK	Hex(5)HexNAc(5)Fuc(2)	3451.55	3451.56	3	1.8	6.63	450.39	307.8
P27487	Dipeptidyl peptidase 4	513	KLDFIILNETK	Hex(5)HexNAc(5)Fuc(2)NeuAc(1)	3742.64	3742.65	3	2.3	6.66	543.6	272.13
P27487	Dipeptidyl peptidase 4	513	KLDFIILNETK	Hex(5)HexNAc(5)Fuc(3)	3597.61	3597.62	3	3.8	5.89	395.24	270.06
P27487	Dipeptidyl peptidase 4	513	KLDFIILNETK	Hex(5)HexNAc(5)Fuc(3)NeuAc(1)	3888.7	3888.71	3	2.9	5.96	388.49	202.5
P27487	Dipeptidyl peptidase 4	513	KLDFIILNETK	Hex(5)HexNAc(5)Fuc(4)	3743.67	3743.66	3	-1	4.53	281.93	157.66
P27487	Dipeptidyl peptidase 4	513	KLDFIILNETK	Hex(5)HexNAc(5)NeuAc(2)	3741.62	3741.63	4	2.6	4.75	251.07	144.62
P27487	Dipeptidyl peptidase 4	513	KLDFIILNETK	Hex(6)HexNAc(2)	2712.25	2712.25	3	-1	2.53	210.1	166.97
P27487	Dipeptidyl peptidase 4	513	KLDFIILNETK	Hex(6)HexNAc(3)	2915.33	2915.33	3	1.2	9.27	600.55	355.7
P27487	Dipeptidyl peptidase 4	513	KLDFIILNETK	Hex(6)HexNAc(3)Fuc(1)	3061.39	3061.39	3	1.9	10.37	643.13	455.68
P27487	Dipeptidyl peptidase 4	513	KLDFIILNETK	Hex(6)HexNAc(3)Fuc(1)NeuAc(1)	3352.48	3352.48	3	0.4	9.48	620.06	364.64
P27487	Dipeptidyl peptidase 4	513	KLDFIILNETK	Hex(6)HexNAc(3)Fuc(2)	3207.44	3207.45	3	2.8	6.36	463.76	290.69
P27487	Dipeptidyl peptidase 4	513	KLDFIILNETK	Hex(6)HexNAc(3)NeuAc(1)	3206.42	3206.43	3	0.8	10.46	646.48	426.96
P27487	Dipeptidyl peptidase 4	513	KLDFIILNETK	Hex(6)HexNAc(4)Fuc(1)	3264.46	3264.46	3	-1.5	6.76	551.01	331.95
P27487	Dipeptidyl peptidase 4	513	KLDFIILNETK	Hex(6)HexNAc(4)Fuc(1)NeuAc(1)	3555.56	3555.55	3	-3.9	5.94	431.66	224.26
P27487	Dipeptidyl peptidase 4	513	KLDFIILNETK	Hex(6)HexNAc(4)Fuc(2)	3410.52	3410.53	3	1.9	5.59	313.68	168.15
P27487	Dipeptidyl peptidase 4	513	KLDFIILNETK	Hex(6)HexNAc(5)Fuc(1)NeuAc(1)	3758.64	3758.65	3	2.2	4.2	334.58	128.12
P27487	Dipeptidyl peptidase 4	513	KLDFIILNETK	Hex(6)HexNAc(5)Fuc(1)NeuAc(2)	4049.74	4048.75	3	3.3	5.54	334.69	123.31
P27487	Dipeptidyl peptidase 4	513	KLDFIILNETK	Hex(6)HexNAc(5)Fuc(2)NeuAc(1)	3904.7	3904.7	3	1.6	2.86	286.77	102.42
P27487	Dipeptidyl peptidase 4	513	KLDFIILNETK	Hex(6)HexNAc(5)Fuc(3)	3759.66	3759.64	3	-4.1	2.62	278.86	121.2
P27487	Dipeptidyl peptidase 4	513	KLDFIILNETK	Hex(6)HexNAc(6)Fuc(1)NeuAc(3)	4543.91	4542.89	3	-3.2	2.47	241.11	75.48
P27487	Dipeptidyl peptidase 4	513	KLDFIILNETK	Hex(7)HexNAc(4)	3280.46	3280.47	3	3.2	5.94	410.43	223.59
P27487	Dipeptidyl peptidase 4	513	KLDFIILNETK	Hex(7)HexNAc(4)Fuc(1)	3426.52	3426.52	3	-0.3	6.23	391.51	232.58
P27487	Dipeptidyl peptidase 4	513	KLDFIILNETK	Hex(7)HexNAc(4)Fuc(2)	3572.58	3572.58	3	0	2.01	198.77	111.89
P27487	Dipeptidyl peptidase 4	513	KLDFIILNETK	Hex(8)HexNAc(2)	3036.35	3036.35	3	-0.9	4.7	250.24	138.52
P27487	Dipeptidyl peptidase 4	513	KLDFIILNETK	Hex(9)HexNAc(2)	3198.41	3198.42	3	2.8	6.64	529.44	320.13
P27487	Dipeptidyl peptidase 4	513	KLDFIILNETK	Hex(4)HexNAc(7)Fuc(3)NeuAc(1)	4132.81	4133.8	4	-2.2	5.81	393.12	291.11
P27487	Dipeptidyl peptidase 4	513	KLDFIILNETK	Hex(6)HexNAc(7)Fuc(4)NeuAc(3)	5185.16	5185.15	4	-1.8	5.3	317.44	151.62
P27487	Dipeptidyl peptidase 4	513	KLDFIILNETK	Hex(10)HexNAc(2)	3360.46	3360.46	3	0.8	5.13	241.66	178.57
P27487	Dipeptidyl peptidase 4	514	LDFIILNETK	Hex(5)HexNAc(4)Fuc(1)NeuAc(1)	3265.41	3265.41	2	-0.1	6.58	490.23	264.88
P27487	Dipeptidyl peptidase 4	514	LDFIILNETK	Hex(5)HexNAc(4)Fuc(1)NeuAc(2)	3556.51	3556.51	3	0.4	6.54	458.24	316.83
P27487	Dipeptidyl peptidase 4	514	LDFIILNETK	Hex(5)HexNAc(4)Fuc(2)NeuAc(1)	3411.47	3411.47	2	0.3	6.68	466.54	304.56
P27487	Dipeptidyl peptidase 4	514	LDFIILNETK	Hex(5)HexNAc(4)Fuc(3)NeuAc(1)	3557.53	3557.55	2	4.8	3.32	314.35	166.9
P27487	Dipeptidyl peptidase 4	514	LDFIILNETK	Hex(5)HexNAc(5)Fuc(1)	3177.4	3177.4	3	0.3	5.92	368.33	193.38
P27487	Dipeptidyl peptidase 4	514	LDFIILNETK	Hex(5)HexNAc(5)Fuc(1)NeuAc(2)	3759.59	3759.59	3	1.8	6.09	398.47	290.06
P27487	Dipeptidyl peptidase 4	514	LDFIILNETK	Hex(5)HexNAc(5)Fuc(4)	3615.57	3615.57	2	1	4.28	320.13	184.11
P27487	Dipeptidyl peptidase 4	514	LDFIILNETK	Hex(6)HexNAc(3)Fuc(1)NeuAc(1)	3224.39	3224.39	2	2.5	7.05	545.47	368.89
P27487	Dipeptidyl peptidase 4	514	LDFIILNETK	Hex(6)HexNAc(3)NeuAc(1)	3078.33	3078.34	2	3.9	6.28	458.86	300.29
P27487	Dipeptidyl peptidase 4	514	LDFIILNETK	Hex(3)HexNAc(6)Fuc(3)	3348.49	3348.49	2	1.4	2.28	274.2	61.85
P27487	Dipeptidyl peptidase 4	514	LDFIILNETK	Hex(6)HexNAc(6)Fuc(4)NeuAc(1)	4271.8	4271.82	4	4.4	2.34	217.86	140.01
P27487	Dipeptidyl peptidase 4	685	NSTVMSR	Hex(5)HexNAc(5)Fuc(1)NeuAc(1)	3057.2	3057.2	3	0.3	2.33	220.35	23.03
P27487	Dipeptidyl peptidase 4	685	NSTVMSR	Hex(5)HexNAc(5)NeuAc(1)	2911.14	2911.14	3	0.7	4.12	259.25	86.94
P27487	Dipeptidyl peptidase 4	685	NSTVMSR	Hex(5)HexNAc(5)NeuAc(2)	3202.23	3202.24	3	0.8	4.12	254.05	88.78
P27487	Dipeptidyl peptidase 4	318	RIQNYSVMDIC*DYDESSGR	Hex(5)HexNAc(3)NeuAc(1)	4018.59	4018.58	3	-4.4	5.41	319.7	160.56
P27487	Dipeptidyl peptidase 4	318	RIQNYSVMDIC*DYDESSGR	Hex(5)HexNAc(4)Fuc(2)NeuAc(1)	4513.79	4514.79	3	-1.7	5.62	293.24	115.14
P27487	Dipeptidyl peptidase 4	318	RIQNYSVMDIC*DYDESSGR	Hex(5)HexNAc(4)NeuAc(2)	4512.77	4511.79	4	4.3	2	189.99	86.12
P27487	Dipeptidyl peptidase 4	318	RIQNYSVMDIC*DYDESSGR	Hex(5)HexNAc(5)Fuc(1)NeuAc(1)	4570.81	4569.82	3	3.2	5.96	314.86	127.13
P27487	Dipeptidyl peptidase 4	318	RIQNYSVMDIC*DYDESSGR	Hex(5)HexNAc(5)NeuAc(2)	4715.85	4714.86	4	2.9	2.15	211.84	110.84
P27487	Dipeptidyl peptidase 4	318	RIQNYSVMDIC*DYDESSGR	Hex(6)HexNAc(3)NeuAc(1)	4180.65	4180.65	4	0.7	6.99	532.01	54.44
P27487	Dipeptidyl peptidase 4	318	RIQNYSVMDIC*DYDESSGR	Hex(6)HexNAc(4)Fuc(1)NeuAc(1)	4529.78	4529.78	4	-1.9	5.51	285.72	133.23
P27487	Dipeptidyl peptidase 4	318	RIQNYSVMDIC*DYDESSGR	Hex(6)HexNAc(4)NeuAc(1)	4383.73	4382.73	3	1.2	6.46	340.54	173.91
P27487	Dipeptidyl peptidase 4	318	RIQNYSVMDIC*DYDESSGR	Hex(7)HexNAc(4)NeuAc(1)	4545.78	4544.78	4	0.7	6.03	335.34	136.53
P27487	Dipeptidyl peptidase 4	318	RIQNYSVMDIC*DYDESSGR	Hex(6)HexNAc(4)Fuc(3)	4530.81	4530.82	4	2.4	3.89	241.86	168.12
P27487	Dipeptidyl peptidase 4	670	YMGLPTPEDNLDHYRNSTVMSR	Hex(5)HexNAc(5)Fuc(1)NeuAc(2)	5150.1	5150.11	4	1	4.72	362.31	24.81
P27487	Dipeptidyl peptidase 4	670	YMGLPTPEDNLDHYRNSTVMSR	Hex(6)HexNAc(5)NeuAc(1)	4875	4873.99	4	-2.5	2	225.91	78.54
P35613	Basigin	265	ALMNGSESR	Hex(8)HexNAc(2)	2667.03	2667.03	2	-0.7	5.03	308.08	101.49
P35613	Basigin	153	ILLTC*SLNDSATEVTGHR	Hex(5)HexNAc(4)Fuc(1)NeuAc(1)	4046.73	4047.72	4	-1.7	5.34	344.89	117.72
P35613	Basigin	153	ILLTC*SLNDSATEVTGHR	Hex(5)HexNAc(4)Fuc(1)NeuAc(2)	4337.82	4337.82	3	-1.3	5.72	429.84	102.55
P35613	Basigin	153	ILLTC*SLNDSATEVTGHR	Hex(5)HexNAc(5)Fuc(1)NeuAc(1)	4249.81	4249.8	3	-1.6	10.2	650.49	315.3
P35613	Basigin	153	ILLTC*SLNDSATEVTGHR	Hex(5)HexNAc(5)Fuc(1)NeuAc(2)	4540.9	4539.9	3	0.3	9.51	617.28	271.73
P35613	Basigin	153	ILLTC*SLNDSATEVTGHR	Hex(5)HexNAc(5)Fuc(2)	4104.77	4103.77	3	1.9	5.67	418.47	155.62
P35613	Basigin	153	ILLTC*SLNDSATEVTGHR	Hex(5)HexNAc(5)Fuc(2)NeuAc(1)	4395.86	4395.88	3	2.9	9.13	633.75	80.34
P35613	Basigin	153	ILLTC*SLNDSATEVTGHR	Hex(6)HexNAc(5)Fuc(1)NeuAc(2)	4702.95	4702.97	3	2.7	2.32	291.21	21.9
P35613	Basigin	153	ILLTC*SLNDSATEVTGHR	Hex(6)HexNAc(5)Fuc(2)NeuAc(1)	4557.92	4557.93	4	3.6	2.76	254.29	25.22
P35613	Basigin	153	ILLTC*SLNDSATEVTGHR	Hex(6)HexNAc(5)Fuc(3)NeuAc(1)	4703.97	4702.99	4	3.7	6.13	350.74	218.55
P35613	Basigin	153	ILLTC*SLNDSATEVTGHR	Hex(6)HexNAc(5)Fuc(4)	4558.94	4558.94	4	1.4	3.64	273.49	84.29
P35613	Basigin	153	ILLTC*SLNDSATEVTGHR	Hex(6)HexNAc(6)Fuc(1)NeuAc(2)	4906.03	4905.05	4	3.2	6.08	411.54	173.5
P35613	Basigin	153	ILLTC*SLNDSATEVTGHR	Hex(6)HexNAc(6)Fuc(1)NeuAc(3)	5197.13	5196.14	4	3.5	6.28	410.88	233.73
P35613	Basigin	153	ILLTC*SLNDSATEVTGHR	Hex(6)HexNAc(6)Fuc(2)NeuAc(1)	4761	4761.01	3	3.9	2.02	203.07	44.42
P35613	Basigin	153	ILLTC*SLNDSATEVTGHR	Hex(6)HexNAc(6)Fuc(2)NeuAc(2)	5052.09	5051.11	4	5.2	5.62	363.86	128.95
P35613	Basigin	153	ILLTC*SLNDSATEVTGHR	Hex(6)HexNAc(6)Fuc(3)NeuAc(1)	4907.05	4907.06	4	1.2	5.6	410.6	10.75
P35613	Basigin	153	ILLTC*SLNDSATEVTGHR	Hex(7)HexNAc(2)	3527.52	3527.52	3	-0.9	7.05	546.96	316.91
P35613	Basigin	153	ILLTC*SLNDSATEVTGHR	Hex(7)HexNAc(6)Fuc(2)NeuAc(2)	5214.14	5213.16	4	3	2	208.82	86.18
P35613	Basigin	153	ILLTC*SLNDSATEVTGHR	Hex(8)HexNAc(2)	3689.57	3689.57	3	0	10.67	660.29	360.54
P35613	Basigin	153	ILLTC*SLNDSATEVTGHR	Hex(9)HexNAc(2)	3851.63	3851.63	3	1.2	14.58	808.91	533.83
P35613	Basigin	153	ILLTC*SLNDSATEVTGHR	Hex(6)HexNAc(6)NeuAc(3)	5051.07	5050.06	3	-0.8	6.88	447.99	258.17
P35613	Basigin	153	ILLTC*SLNDSATEVTGHR	Hex(6)HexNAc(7)Fuc(1)NeuAc(3)	5400.21	5401.19	4	-4.2	2.19	247.81	66.81
P35613	Basigin	153	ILLTC*SLNDSATEVTGHR	Hex(7)HexNAc(7)Fuc(1)NeuAc(3)	5562.26	5561.24	4	-2.7	3.47	245.13	67.43
P35613	Basigin	153	ILLTC*SLNDSATEVTGHR	Hex(10)HexNAc(2)	4013.68	4013.67	3	-1.6	6.87	544.02	285.68
P40199	Carcinoembryonic antigen-related cell adhesion molecule 6	208	NDAGSYEC*EIQNPASANR	Hex(5)HexNAc(2)	3212.27	3212.27	3	1.5	10.48	614.32	445.04
P40199	Carcinoembryonic antigen-related cell adhesion molecule 6	208	NDAGSYEC*EIQNPASANR	Hex(6)HexNAc(2)	3374.32	3374.32	3	-0.1	7.15	504.84	363.72
P40199	Carcinoembryonic antigen-related cell adhesion molecule 6	207	RNDAGSYEC*EIQNPASANR	Hex(5)HexNAc(2)	3368.37	3368.37	3	0	6.47	409.59	230.85
P40199	Carcinoembryonic antigen-related cell adhesion molecule 6	207	RNDAGSYEC*EIQNPASANR	Hex(6)HexNAc(2)	3530.42	3530.42	3	0.4	5.62	300.91	134.51
P42892	Endothelin-converting enzyme 1	266	DYYLNK	Hex(9)HexNAc(2)	2680.03	2680.04	2	4.3	3.71	323.98	133.36
P42892	Endothelin-converting enzyme 1	162	HLLENSTASVSEAER	Hex(5)HexNAc(4)Fuc(3)	3703.56	3703.55	3	-2	2.45	259.57	79.44
P42892	Endothelin-converting enzyme 1	162	HLLENSTASVSEAER	Hex(5)HexNAc(5)Fuc(1)	3614.52	3614.53	3	1.3	3.77	296.31	54.18
P42892	Endothelin-converting enzyme 1	162	HLLENSTASVSEAER	Hex(5)HexNAc(5)Fuc(1)NeuAc(1)	3905.62	3905.62	3	0.9	6.17	409.74	144.2
P42892	Endothelin-converting enzyme 1	162	HLLENSTASVSEAER	Hex(5)HexNAc(5)Fuc(1)NeuAc(2)	4196.71	4196.71	3	0.2	4.6	320.27	40.5
P42892	Endothelin-converting enzyme 1	162	HLLENSTASVSEAER	Hex(5)HexNAc(5)Fuc(3)NeuAc(1)	4197.73	4196.74	4	2	5.32	300.4	94.81
P42892	Endothelin-converting enzyme 1	162	HLLENSTASVSEAER	Hex(6)HexNAc(6)Fuc(1)NeuAc(1)	4270.75	4270.75	3	-0.9	5.24	307.27	114.98
P42892	Endothelin-converting enzyme 1	162	HLLENSTASVSEAER	Hex(7)HexNAc(2)	3183.33	3183.32	3	-2.2	6.05	393.87	247.45
P42892	Endothelin-converting enzyme 1	162	HLLENSTASVSEAER	Hex(8)HexNAc(2)	3345.38	3345.39	3	0.3	6.38	384.12	217.34
P42892	Endothelin-converting enzyme 1	162	HLLENSTASVSEAER	Hex(9)HexNAc(2)	3507.44	3507.44	3	1.6	5.38	321.15	221.6
P42892	Endothelin-converting enzyme 1	162	HLLENSTASVSEAERK	Hex(5)HexNAc(5)Fuc(1)	3742.62	3742.62	4	1.4	3.86	255.48	86.18
P42892	Endothelin-converting enzyme 1	162	HLLENSTASVSEAERK	Hex(6)HexNAc(6)Fuc(1)	4107.75	4107.74	3	-1.1	2.55	391.82	63.38
P42892	Endothelin-converting enzyme 1	162	HLLENSTASVSEAERK	Hex(9)HexNAc(2)	3635.53	3635.53	3	-0.1	2.87	375.99	118.85
P42892	Endothelin-converting enzyme 1	206	LGGWNITGPWAK	Hex(6)HexNAc(6)Fuc(1)NeuAc(2)	4218.73	4217.73	3	1.7	4.69	246.51	111.59
P42892	Endothelin-converting enzyme 1	206	LGGWNITGPWAK	Hex(9)HexNAc(2)	3164.32	3164.33	3	2.1	4.82	284.29	116.07
P43251	Biotinidase	340	NPVGLIGAENATGETDPSHSK	Hex(5)HexNAc(2)	3310.43	3310.44	3	3.7	6.85	518.25	338.27
P43251	Biotinidase	340	NPVGLIGAENATGETDPSHSK	Hex(6)HexNAc(2)	3472.49	3472.5	3	3	12.49	741.92	504.08
P43251	Biotinidase	340	NPVGLIGAENATGETDPSHSK	Hex(7)HexNAc(2)	3634.54	3634.55	3	2.1	5.8	418.47	264.74
P43251	Biotinidase	340	NPVGLIGAENATGETDPSHSK	Hex(8)HexNAc(2)	3796.59	3796.59	3	-1.5	8.58	597.56	362.81
P50895	Basal cell adhesion molecule	437	TQ+NFTLLVQGSPELK	Hex(4)HexNAc(5)	3339.5	3339.51	2	4.2	5.44	296.75	58.44
P50895	Basal cell adhesion molecule	437	TQ+NFTLLVQGSPELK	Hex(5)HexNAc(3)NeuAc(1)	3386.49	3386.5	3	4	2.97	256.56	74.63
P50895	Basal cell adhesion molecule	437	TQ+NFTLLVQGSPELK	Hex(6)HexNAc(6)Fuc(1)NeuAc(1)	4303.84	4302.82	3	-4.2	2.87	304.43	65.37
P50895	Basal cell adhesion molecule	437	TQ+NFTLLVQGSPELK	Hex(5)HexNAc(6)NeuAc(2)	4286.82	4287.82	4	-0.5	5.01	358.65	25.02
P50895	Basal cell adhesion molecule	437	TQNFTLLVQGSPELK	Hex(3)HexNAc(5)Fuc(1)	3322.52	3322.53	3	4.7	5.98	404.25	300.15
P50895	Basal cell adhesion molecule	437	TQNFTLLVQGSPELK	Hex(4)HexNAc(3)Fuc(2)	3224.47	3224.46	3	-4.3	5.82	397.61	231.9
P50895	Basal cell adhesion molecule	437	TQNFTLLVQGSPELK	Hex(4)HexNAc(5)	3338.51	3338.52	3	1.2	12.48	739.37	473.16
P50895	Basal cell adhesion molecule	437	TQNFTLLVQGSPELK	Hex(4)HexNAc(5)Fuc(1)	3484.57	3484.57	3	0.7	11.53	685.51	428.1
P50895	Basal cell adhesion molecule	437	TQNFTLLVQGSPELK	Hex(4)HexNAc(5)NeuAc(1)	3629.61	3629.61	3	1.4	12.48	741.65	450.02
P50895	Basal cell adhesion molecule	437	TQNFTLLVQGSPELK	Hex(5)HexNAc(2)	2891.33	2891.32	3	-2.1	10.15	631.73	388.67
P50895	Basal cell adhesion molecule	437	TQNFTLLVQGSPELK	Hex(5)HexNAc(3)NeuAc(1)	3385.5	3385.5	3	-2.5	5.87	402.23	201.71
P50895	Basal cell adhesion molecule	437	TQNFTLLVQGSPELK	Hex(5)HexNAc(4)	3297.49	3297.49	3	-0.1	12.46	736.49	426.7
P50895	Basal cell adhesion molecule	437	TQNFTLLVQGSPELK	Hex(5)HexNAc(4)NeuAc(1)	3588.58	3588.57	3	-4.7	5.81	375.44	230.77
P50895	Basal cell adhesion molecule	437	TQNFTLLVQGSPELK	Hex(5)HexNAc(5)	3500.57	3500.57	3	1.1	12.48	744.41	532.93
P50895	Basal cell adhesion molecule	437	TQNFTLLVQGSPELK	Hex(5)HexNAc(5)Fuc(1)	3646.62	3646.64	3	3.6	11.23	678.03	440.2
P50895	Basal cell adhesion molecule	437	TQNFTLLVQGSPELK	Hex(5)HexNAc(5)Fuc(1)NeuAc(1)	3937.72	3937.73	3	2.6	6.6	529.07	259.56
P50895	Basal cell adhesion molecule	437	TQNFTLLVQGSPELK	Hex(5)HexNAc(5)Fuc(2)NeuAc(1)	4083.78	4082.77	3	-1.4	6.84	467.85	11.5
P50895	Basal cell adhesion molecule	437	TQNFTLLVQGSPELK	Hex(5)HexNAc(5)NeuAc(1)	3791.66	3791.66	3	0.5	10.56	678.96	361.92
P50895	Basal cell adhesion molecule	437	TQNFTLLVQGSPELK	Hex(5)HexNAc(5)NeuAc(2)	4082.76	4082.77	3	2.3	6.65	493.4	24.8
P50895	Basal cell adhesion molecule	437	TQNFTLLVQGSPELK	Hex(5)HexNAc(6)	3703.65	3703.65	3	1.3	8.4	569.27	380.42
P50895	Basal cell adhesion molecule	437	TQNFTLLVQGSPELK	Hex(6)HexNAc(3)	3256.46	3256.46	3	-1.2	6.76	538.8	334.38
P50895	Basal cell adhesion molecule	437	TQNFTLLVQGSPELK	Hex(6)HexNAc(3)NeuAc(1)	3547.56	3547.56	3	0.5	7.48	574.57	363.07
P50895	Basal cell adhesion molecule	437	TQNFTLLVQGSPELK	Hex(6)HexNAc(4)	3459.54	3459.55	3	3.5	6.49	450.43	307.07
P50895	Basal cell adhesion molecule	437	TQNFTLLVQGSPELK	Hex(6)HexNAc(6)Fuc(1)	4011.76	4011.76	3	0.8	7.33	567.35	344.99
P50895	Basal cell adhesion molecule	437	TQNFTLLVQGSPELK	Hex(6)HexNAc(6)NeuAc(1)	4156.79	4157.79	3	-0.8	6.07	385.91	65.73
P50895	Basal cell adhesion molecule	437	TQNFTLLVQGSPELK	Hex(7)HexNAc(2)	3215.43	3215.44	3	3.1	10.26	644.74	413.92
P50895	Basal cell adhesion molecule	437	TQNFTLLVQGSPELK	Hex(8)HexNAc(2)	3377.49	3377.5	3	2.8	12.26	728.72	477.18
P50895	Basal cell adhesion molecule	437	TQNFTLLVQGSPELK	Hex(9)HexNAc(2)	3539.54	3539.53	3	-1.6	15.34	855.32	560.41
P50895	Basal cell adhesion molecule	437	TQNFTLLVQGSPELK	Hex(4)HexNAc(4)	3135.43	3135.43	3	-1.3	10.3	609.43	382.76
P50895	Basal cell adhesion molecule	437	TQNFTLLVQGSPELK	Hex(3)HexNAc(5)	3176.46	3176.46	3	-0.4	6.8	481.85	327.88
P50895	Basal cell adhesion molecule	437	TQNFTLLVQGSPELK	Hex(4)HexNAc(3)NeuAc(1)	3223.45	3223.47	3	4.9	11.05	661.82	381.83
P50895	Basal cell adhesion molecule	437	TQNFTLLVQGSPELK	Hex(5)HexNAc(6)Fuc(1)	3849.7	3849.69	3	-2.7	6.01	367.99	276.7
P50895	Basal cell adhesion molecule	437	TQNFTLLVQGSPELK	Hex(4)HexNAc(4)Fuc(3)NeuAc(1)	3864.7	3864.72	3	4.1	5.08	436.53	283.84
P50895	Basal cell adhesion molecule	437	TQNFTLLVQGSPELK	Hex(6)HexNAc(6)	3865.7	3865.71	3	3.2	9.26	582.3	409.16
P50895	Basal cell adhesion molecule	437	TQNFTLLVQGSPELK	Hex(10)HexNAc(2)	3701.59	3701.59	3	0.3	7.48	564.59	367.4
P51654	Glypican-3	121	HAKNYTNAMFK	Hex(5)HexNAc(5)Fuc(1)NeuAc(2)	3878.56	3878.56	3	2.1	3.37	341.28	213.13
P53801	Pituitary tumor-transforming gene 1 protein-interacting protein	54	NVSC*LWC*NTNK	Hex(6)HexNAc(2)	2774.09	2774.09	3	0.6	10.31	641.42	385.38
P53801	Pituitary tumor-transforming gene 1 protein-interacting protein	54	NVSC*LWC*NTNK	Hex(6)HexNAc(3)Fuc(2)	3269.29	3269.28	3	-0.6	4.43	265.53	97.39
P53801	Pituitary tumor-transforming gene 1 protein-interacting protein	54	NVSC*LWC*NTNK	Hex(7)HexNAc(2)	2936.14	2936.14	3	-0.7	11.24	656.8	414.97
P53801	Pituitary tumor-transforming gene 1 protein-interacting protein	54	NVSC*LWC*NTNK	Hex(8)HexNAc(2)	3098.2	3098.2	3	2.2	6.85	467.42	369.87
P53801	Pituitary tumor-transforming gene 1 protein-interacting protein	54	NVSC*LWC*NTNK	Hex(9)HexNAc(2)	3260.25	3260.24	3	-3.6	5.56	361.89	168.6
P53801	Pituitary tumor-transforming gene 1 protein-interacting protein	47	TC*EEC*LKNVSC*LWC*NTNK	Hex(5)HexNAc(2)	3532.41	3532.4	3	-2.8	11.87	719.98	541.2
P53801	Pituitary tumor-transforming gene 1 protein-interacting protein	47	TC*EEC*LKNVSC*LWC*NTNK	Hex(6)HexNAc(2)	3694.46	3694.47	3	0.6	14.23	848.61	572.81
P53801	Pituitary tumor-transforming gene 1 protein-interacting protein	47	TC*EEC*LKNVSC*LWC*NTNK	Hex(6)HexNAc(3)Fuc(2)	4189.66	4189.67	3	3	4.71	292.64	128.69
P53801	Pituitary tumor-transforming gene 1 protein-interacting protein	47	TC*EEC*LKNVSC*LWC*NTNK	Hex(6)HexNAc(3)NeuAc(1)	4188.64	4187.65	3	4.6	4.35	294.29	90.59
P53801	Pituitary tumor-transforming gene 1 protein-interacting protein	47	TC*EEC*LKNVSC*LWC*NTNK	Hex(7)HexNAc(2)	3856.52	3856.52	3	0.9	14.23	844.24	574.33
P53801	Pituitary tumor-transforming gene 1 protein-interacting protein	47	TC*EEC*LKNVSC*LWC*NTNK	Hex(8)HexNAc(2)	4018.57	4018.57	3	0.1	14.2	800.56	446.32
P53801	Pituitary tumor-transforming gene 1 protein-interacting protein	47	TC*EEC*LKNVSC*LWC*NTNK	Hex(9)HexNAc(2)	4180.62	4180.61	3	-1.9	9.04	583.39	265.76
P55899	IgG receptor FcRn large subunit p51	109	GPYTLQ+GLLGC*ELGPDNTSVPTAK	Hex(5)HexNAc(5)Fuc(1)NeuAc(1)	4752.04	4753.05	3	1.1	2.89	282.82	30.23
P55899	IgG receptor FcRn large subunit p51	109	GPYTLQGLLGC*ELGPDNTSVPTAK	Hex(4)HexNAc(5)Fuc(1)NeuAc(1)	4589	4588	4	0.1	6.57	415.39	215.72
P55899	IgG receptor FcRn large subunit p51	109	GPYTLQGLLGC*ELGPDNTSVPTAK	Hex(4)HexNAc(5)Fuc(3)	4590.02	4589.02	3	1.3	6.53	402.53	253.65
P55899	IgG receptor FcRn large subunit p51	109	GPYTLQGLLGC*ELGPDNTSVPTAK	Hex(5)HexNAc(4)Fuc(1)NeuAc(1)	4547.97	4547.98	3	1	6.11	368.46	57.99
P55899	IgG receptor FcRn large subunit p51	109	GPYTLQGLLGC*ELGPDNTSVPTAK	Hex(5)HexNAc(4)Fuc(1)NeuAc(2)	4839.07	4839.07	3	-0.4	6.32	390.97	10.35
P55899	IgG receptor FcRn large subunit p51	109	GPYTLQGLLGC*ELGPDNTSVPTAK	Hex(5)HexNAc(4)Fuc(3)NeuAc(1)	4840.09	4839.09	4	1.7	7.26	536.78	328.55
P55899	IgG receptor FcRn large subunit p51	109	GPYTLQGLLGC*ELGPDNTSVPTAK	Hex(5)HexNAc(5)Fuc(1)	4459.96	4460.98	3	3.4	4.84	327.51	167.09
P55899	IgG receptor FcRn large subunit p51	109	GPYTLQGLLGC*ELGPDNTSVPTAK	Hex(5)HexNAc(5)Fuc(1)NeuAc(1)	4751.05	4751.06	3	0.4	15.51	859.48	41.34
P55899	IgG receptor FcRn large subunit p51	109	GPYTLQGLLGC*ELGPDNTSVPTAK	Hex(5)HexNAc(5)Fuc(2)	4606.02	4607.03	3	2.3	5.39	293.71	176.75
P55899	IgG receptor FcRn large subunit p51	109	GPYTLQGLLGC*ELGPDNTSVPTAK	Hex(5)HexNAc(5)Fuc(2)NeuAc(1)	4897.11	4896.12	3	2.4	9.35	638.05	313.36
P55899	IgG receptor FcRn large subunit p51	109	GPYTLQGLLGC*ELGPDNTSVPTAK	Hex(6)HexNAc(5)Fuc(1)NeuAc(1)	4913.11	4914.09	4	-3.7	6.54	523.92	144.26
P55899	IgG receptor FcRn large subunit p51	109	GPYTLQGLLGC*ELGPDNTSVPTAK	Hex(6)HexNAc(5)Fuc(2)	4768.07	4768.09	4	3.6	8.02	529.48	342.71
P55899	IgG receptor FcRn large subunit p51	109	GPYTLQGLLGC*ELGPDNTSVPTAK	Hex(6)HexNAc(5)Fuc(2)NeuAc(1)	5059.16	5059.18	4	3.8	6.55	491	28.6
P55899	IgG receptor FcRn large subunit p51	109	GPYTLQGLLGC*ELGPDNTSVPTAK	Hex(6)HexNAc(5)Fuc(3)	4914.13	4914.14	4	3.2	6.73	456.36	297.56
P55899	IgG receptor FcRn large subunit p51	109	GPYTLQGLLGC*ELGPDNTSVPTAK	Hex(6)HexNAc(5)Fuc(4)	5060.18	5059.2	3	3	5.91	329.74	143.75
P55899	IgG receptor FcRn large subunit p51	109	GPYTLQGLLGC*ELGPDNTSVPTAK	Hex(6)HexNAc(6)Fuc(2)NeuAc(1)	5262.24	5261.23	4	-1.4	6.16	357.48	33.47
P55899	IgG receptor FcRn large subunit p51	109	GPYTLQGLLGC*ELGPDNTSVPTAK	Hex(7)HexNAc(5)Fuc(1)NeuAc(1)	5075.16	5074.18	4	4.1	4.65	243.19	104.92
P56199	Integrin alpha-1	876	DSC*ESN+HNITC*K	Hex(7)HexNAc(2)	3006.1	3006.1	3	0.9	7.15	517.17	370.32
P56199	Integrin alpha-1	876	DSC*ESN+HNITC*K	Hex(8)HexNAc(2)	3168.15	3168.16	3	2.4	6.53	469.63	304.5
P56199	Integrin alpha-1	876	DSC*ESN+HNITC*K	Hex(9)HexNAc(2)	3330.2	3330.21	3	0.8	4.33	220.02	125.38
P56199	Integrin alpha-1	876	DSC*ESNHNITC*K	Hex(7)HexNAc(2)	3005.11	3005.11	3	-0.4	8.11	559.57	434.04
P56199	Integrin alpha-1	876	DSC*ESNHNITC*K	Hex(8)HexNAc(2)	3167.17	3167.16	3	-0.4	10.39	624.18	494.16
P56199	Integrin alpha-1	876	DSC*ESNHNITC*K	Hex(9)HexNAc(2)	3329.22	3329.22	3	0.2	7.79	424.43	385.19
P56199	Integrin alpha-1	418	NTTFNVESTK	Hex(6)HexNAc(2)	2519.03	2519.03	2	0.9	6.71	475.47	318.04
P56199	Integrin alpha-1	418	NTTFNVESTK	Hex(7)HexNAc(2)	2681.08	2681.09	2	2.7	6.34	470.25	296.8
P56199	Integrin alpha-1	418	NTTFNVESTK	Hex(8)HexNAc(2)	2843.13	2843.14	2	1.4	6.66	477.46	305.11
P56199	Integrin alpha-1	418	NTTFNVESTKK	Hex(6)HexNAc(2)	2647.12	2647.12	3	-1.2	2.45	257.65	55.43
P56199	Integrin alpha-1	418	NTTFNVESTKK	Hex(7)HexNAc(2)	2809.18	2809.18	3	1.6	2.33	248.67	31.11
P56199	Integrin alpha-1	206	QTQVGIVQYGENVTHEFNLNK	Hex(5)HexNAc(5)Fuc(1)NeuAc(1)	4681.02	4681.04	3	4.7	5.72	442.75	106.82
P56199	Integrin alpha-1	1111	SENASLVLSSSNQK	Hex(6)HexNAc(2)	2842.21	2842.21	2	0.4	5.36	404.53	232.01
P56199	Integrin alpha-1	1111	SENASLVLSSSNQK	Hex(7)HexNAc(2)	3004.26	3004.27	2	2.4	11.24	697.06	410.61
P56199	Integrin alpha-1	1111	SENASLVLSSSNQK	Hex(8)HexNAc(2)	3166.32	3166.32	2	1.7	14.37	844.6	518.3
P56199	Integrin alpha-1	1111	SENASLVLSSSNQK	Hex(9)HexNAc(2)	3328.37	3328.38	2	4.2	10.11	697.85	365.34
P56199	Integrin alpha-1	834	SQNDKFNVSLTVK	Hex(6)HexNAc(2)	2858.26	2858.26	3	1	5.63	381.69	145.05
P56199	Integrin alpha-1	834	SQNDKFNVSLTVK	Hex(7)HexNAc(2)	3020.31	3020.31	3	1.7	6.19	516.12	254
P56199	Integrin alpha-1	526	VYVYALNQTR	Hex(4)HexNAc(5)Fuc(1)NeuAc(1)	3327.41	3327.42	3	1.3	4.52	272.4	88.86
P56199	Integrin alpha-1	526	VYVYALNQTR	Hex(5)HexNAc(5)Fuc(1)NeuAc(1)	3489.47	3489.47	3	1	2.89	284.01	91.75
P56199	Integrin alpha-1	459	YNHTGQVIIYR	Hex(8)HexNAc(2)	3066.29	3066.28	3	-3.4	6.53	507.11	341.87
P56199	Integrin alpha-1	459	YNHTGQVIIYR	Hex(9)HexNAc(2)	3228.35	3228.35	3	0.9	7.44	570.9	372.67
P78310	Coxsackievirus and adenovirus receptor	201	NASSEYSGTYSC*TVR	Hex(4)HexNAc(3)Fuc(1)NeuAc(1)	3376.32	3376.31	3	-2.6	4.86	309.78	106.02
P78310	Coxsackievirus and adenovirus receptor	100	SGDASINVTNLQLSDIGTYQC*K	Hex(4)HexNAc(5)NeuAc(1)	4338.84	4337.82	4	-4.2	2.45	200.01	130.87
P78310	Coxsackievirus and adenovirus receptor	100	SGDASINVTNLQLSDIGTYQC*K	Hex(5)HexNAc(4)NeuAc(1)	4297.82	4296.82	3	2.6	6.84	445.94	283.13
P78310	Coxsackievirus and adenovirus receptor	100	SGDASINVTNLQLSDIGTYQC*K	Hex(5)HexNAc(5)	4209.8	4208.8	3	-0.2	8.52	529.8	406.83
P78310	Coxsackievirus and adenovirus receptor	100	SGDASINVTNLQLSDIGTYQC*K	Hex(5)HexNAc(5)Fuc(1)NeuAc(1)	4646.95	4646.97	4	2.6	7.11	471.24	25.53
P78310	Coxsackievirus and adenovirus receptor	100	SGDASINVTNLQLSDIGTYQC*K	Hex(5)HexNAc(5)NeuAc(1)	4500.9	4500.91	4	2.6	11.47	667.15	32.48
P78310	Coxsackievirus and adenovirus receptor	100	SGDASINVTNLQLSDIGTYQC*K	Hex(5)HexNAc(5)NeuAc(2)	4791.99	4791.99	3	0	11.58	683.24	11.05
P78310	Coxsackievirus and adenovirus receptor	100	SGDASINVTNLQLSDIGTYQC*K	Hex(6)HexNAc(5)Fuc(1)	4517.91	4517.93	3	3.2	7.12	530.9	370.98
P78310	Coxsackievirus and adenovirus receptor	100	SGDASINVTNLQLSDIGTYQC*K	Hex(6)HexNAc(5)Fuc(1)NeuAc(1)	4809.01	4810.01	4	-0.2	6.63	399.88	45.05
[truncated: 1,036 more rows]
