# Supplementary material for: Membrane glycomics reveal heterogeneity and quantitative distribution of cell surface sialylation
Source: Royal Society of Chemistry journal article supplement (doi:10.1039/c8sc01875h), 2018-01-01
Supplement: c8sc01875h4.xlsx [file c8sc01875h4.xlsx]

## Sheet: Summary
Table S4. Summary of cell surface glycoproteins and associated glycoforms identified on PNT2.
UniProt Accession	Protein Name	Glycosylation Site	Glycan Composition	Extracellular Domain
O14672	Disintegrin and metalloproteinase domain-containing protein 10	N278	Hex(8)HexNAc(2)	N-terminus
O14672	Disintegrin and metalloproteinase domain-containing protein 10	N278	Hex(9)HexNAc(2)	N-terminus
O14672	Disintegrin and metalloproteinase domain-containing protein 10	N439	Hex(6)HexNAc(2)	N-terminus
O14672	Disintegrin and metalloproteinase domain-containing protein 10	N439	Hex(7)HexNAc(2)	N-terminus
O14672	Disintegrin and metalloproteinase domain-containing protein 10	N439	Hex(8)HexNAc(2)	N-terminus
O14672	Disintegrin and metalloproteinase domain-containing protein 10	N439	Hex(9)HexNAc(2)	N-terminus
O14672	Disintegrin and metalloproteinase domain-containing protein 10	N551	Hex(5)HexNAc(4)Fuc(1)NeuAc(1)	N-terminus
O14672	Disintegrin and metalloproteinase domain-containing protein 10	N551	Hex(5)HexNAc(4)Fuc(2)NeuAc(1)	N-terminus
O14672	Disintegrin and metalloproteinase domain-containing protein 10	N551	Hex(8)HexNAc(2)	N-terminus
O14672	Disintegrin and metalloproteinase domain-containing protein 10	N551	Hex(9)HexNAc(2)	N-terminus
O14786	Neuropilin-1	N150	Hex(5)HexNAc(4)Fuc(1)NeuAc(1)	N-terminus
O15031	Plexin-B2	N528	Hex(5)HexNAc(4)NeuAc(2)	N-terminus
O15031	Plexin-B2	N733	Hex(5)HexNAc(4)Fuc(1)NeuAc(2)	N-terminus
O15031	Plexin-B2	N733	Hex(5)HexNAc(4)Fuc(2)	N-terminus
O15031	Plexin-B2	N733	Hex(5)HexNAc(4)Fuc(2)NeuAc(1)	N-terminus
O15031	Plexin-B2	N733	Hex(5)HexNAc(5)Fuc(1)NeuAc(1)	N-terminus
O15031	Plexin-B2	N759	Hex(6)HexNAc(2)	N-terminus
O15031	Plexin-B2	N759	Hex(7)HexNAc(2)	N-terminus
O15031	Plexin-B2	N759	Hex(8)HexNAc(2)	N-terminus
O15031	Plexin-B2	N759	Hex(9)HexNAc(2)	N-terminus
O15031	Plexin-B2	N795	Hex(8)HexNAc(2)	N-terminus
O15031	Plexin-B2	N1002	Hex(8)HexNAc(2)	N-terminus
O15031	Plexin-B2	N1002	Hex(9)HexNAc(2)	N-terminus
O15031	Plexin-B2	N1068	Hex(5)HexNAc(5)Fuc(2)	N-terminus
O15031	Plexin-B2	N1099	Hex(5)HexNAc(3)Fuc(1)NeuAc(1)	N-terminus
O15031	Plexin-B2	N1099	Hex(5)HexNAc(4)Fuc(1)NeuAc(1)	N-terminus
O15031	Plexin-B2	N1099	Hex(5)HexNAc(4)Fuc(2)NeuAc(1)	N-terminus
O15031	Plexin-B2	N1099	Hex(8)HexNAc(2)	N-terminus
O15031	Plexin-B2	N1099	Hex(9)HexNAc(2)	N-terminus
O15230	Laminin subunit alpha-5	N1330	Hex(9)HexNAc(2)	Extracellular
O15230	Laminin subunit alpha-5	N2209	Hex(9)HexNAc(2)	Extracellular
O15230	Laminin subunit alpha-5	N3287	Hex(3)HexNAc(6)	Extracellular
O15230	Laminin subunit alpha-5	N3287	Hex(8)HexNAc(2)	Extracellular
O60487	Myelin protein zero-like protein 2	N118	Hex(7)HexNAc(2)	N-terminus
O60635	Tetraspanin-1	N154	Hex(7)HexNAc(2)	Loop
O60635	Tetraspanin-1	N154	Hex(8)HexNAc(2)	Loop
O60635	Tetraspanin-1	N154	Hex(9)HexNAc(2)	Loop
O60635	Tetraspanin-1	N154	Hex(5)HexNAc(3)Fuc(1)	Loop
O75054	Immunoglobulin superfamily member 3	N101	Hex(7)HexNAc(2)	N-terminus
O75326	Semaphorin-7A	N258	Hex(8)HexNAc(2)	Extracellular
O75718	Cartilage-associated protein	N87	Hex(8)HexNAc(2)	Extracellular
O75718	Cartilage-associated protein	N363	Hex(7)HexNAc(2)	Extracellular
O75718	Cartilage-associated protein	N363	Hex(8)HexNAc(2)	Extracellular
O75882	Attractin	N731	Hex(9)HexNAc(2)	N-terminus
O75976	Carboxypeptidase D	N978	Hex(5)HexNAc(4)Fuc(2)NeuAc(1)	N-terminus
O75976	Carboxypeptidase D	N978	Hex(5)HexNAc(4)Fuc(3)	N-terminus
O75976	Carboxypeptidase D	N1070	Hex(5)HexNAc(4)Fuc(1)NeuAc(1)	N-terminus
O75976	Carboxypeptidase D	N1070	Hex(5)HexNAc(4)Fuc(3)	N-terminus
O75976	Carboxypeptidase D	N1070	Hex(6)HexNAc(2)	N-terminus
O75976	Carboxypeptidase D	N1070	Hex(7)HexNAc(2)	N-terminus
O96005	Cleft lip and palate transmembrane protein 1	N295	Hex(6)HexNAc(2)	Loop
O96005	Cleft lip and palate transmembrane protein 1	N295	Hex(8)HexNAc(2)	Loop
P00533	Epidermal growth factor receptor	N352	Hex(6)HexNAc(2)	N-terminus
P00533	Epidermal growth factor receptor	N352	Hex(7)HexNAc(2)	N-terminus
P00533	Epidermal growth factor receptor	N352	Hex(8)HexNAc(2)	N-terminus
P00533	Epidermal growth factor receptor	N361	Hex(7)HexNAc(2)	N-terminus
P00533	Epidermal growth factor receptor	N361	Hex(8)HexNAc(2)	N-terminus
P00533	Epidermal growth factor receptor	N623	Hex(6)HexNAc(2)	N-terminus
P00533	Epidermal growth factor receptor	N623	Hex(7)HexNAc(2)	N-terminus
P00533	Epidermal growth factor receptor	N623	Hex(8)HexNAc(2)	N-terminus
P01889	HLA class I histocompatibility antigen, B-7 alpha chain	N110	Hex(4)HexNAc(5)Fuc(2)NeuAc(1)	N-terminus
P02786	Transferrin receptor protein 1	N251	Hex(5)HexNAc(4)Fuc(1)NeuAc(2)	C-terminus
P02786	Transferrin receptor protein 1	N251	Hex(5)HexNAc(4)Fuc(2)NeuAc(1)	C-terminus
P02786	Transferrin receptor protein 1	N251	Hex(5)HexNAc(4)Fuc(3)NeuAc(1)	C-terminus
P02786	Transferrin receptor protein 1	N251	Hex(6)HexNAc(4)Fuc(1)NeuAc(1)	C-terminus
P02786	Transferrin receptor protein 1	N251	Hex(6)HexNAc(5)Fuc(1)NeuAc(2)	C-terminus
P02786	Transferrin receptor protein 1	N727	Hex(8)HexNAc(2)	C-terminus
P02786	Transferrin receptor protein 1	N727	Hex(9)HexNAc(2)	C-terminus
P03989	HLA class I histocompatibility antigen, B-27 alpha chain	N110	Hex(4)HexNAc(6)NeuAc(1)	N-terminus
P04233	HLA class II histocompatibility antigen gamma chain	N130	Hex(6)HexNAc(2)	N-terminus
P05026	Sodium/potassium-transporting ATPase subunit beta-1	N265	Hex(6)HexNAc(7)Fuc(1)NeuAc(2)	C-terminus
P05026	Sodium/potassium-transporting ATPase subunit beta-1	N265	Hex(7)HexNAc(7)NeuAc(2)	C-terminus
P05026	Sodium/potassium-transporting ATPase subunit beta-1	N265	Hex(7)HexNAc(7)Fuc(1)NeuAc(2)	C-terminus
P05187	Alkaline phosphatase, placental type	N144	Hex(5)HexNAc(4)Fuc(1)NeuAc(1)	Extracellular
P05187	Alkaline phosphatase, placental type	N144	Hex(5)HexNAc(4)Fuc(1)NeuAc(2)	Extracellular
P05187	Alkaline phosphatase, placental type	N144	Hex(5)HexNAc(4)Fuc(2)NeuAc(1)	Extracellular
P05187	Alkaline phosphatase, placental type	N144	Hex(5)HexNAc(4)Fuc(3)NeuAc(1)	Extracellular
P05187	Alkaline phosphatase, placental type	N144	Hex(5)HexNAc(5)Fuc(1)NeuAc(2)	Extracellular
P05187	Alkaline phosphatase, placental type	N144	Hex(5)HexNAc(5)Fuc(2)	Extracellular
P05556	Integrin beta-1	N50	Hex(8)HexNAc(2)	N-terminus
P05556	Integrin beta-1	N50	Hex(9)HexNAc(2)	N-terminus
P05556	Integrin beta-1	N212	Hex(5)HexNAc(4)Fuc(1)NeuAc(1)	N-terminus
P05556	Integrin beta-1	N212	Hex(5)HexNAc(4)Fuc(1)NeuAc(2)	N-terminus
P05556	Integrin beta-1	N212	Hex(7)HexNAc(6)Fuc(1)NeuAc(3)	N-terminus
P05556	Integrin beta-1	N212	Hex(6)HexNAc(6)NeuAc(3)	N-terminus
P05556	Integrin beta-1	N212	Hex(6)HexNAc(6)Fuc(2)NeuAc(3)	N-terminus
P05556	Integrin beta-1	N212	Hex(6)HexNAc(2)	N-terminus
P05556	Integrin beta-1	N212	Hex(7)HexNAc(2)	N-terminus
P05556	Integrin beta-1	N212	Hex(8)HexNAc(2)	N-terminus
P05556	Integrin beta-1	N212	Hex(9)HexNAc(2)	N-terminus
P05556	Integrin beta-1	N212	Hex(10)HexNAc(2)	N-terminus
P05556	Integrin beta-1	N406	Hex(9)HexNAc(2)	N-terminus
P05556	Integrin beta-1	N481	Hex(6)HexNAc(2)	N-terminus
P05556	Integrin beta-1	N481	Hex(7)HexNAc(2)	N-terminus
P05556	Integrin beta-1	N481	Hex(8)HexNAc(2)	N-terminus
P05556	Integrin beta-1	N481	Hex(9)HexNAc(2)	N-terminus
P05556	Integrin beta-1	N481	Hex(7)HexNAc(6)Fuc(2)NeuAc(1)	N-terminus
P05556	Integrin beta-1	N481	Hex(10)HexNAc(2)	N-terminus
P05556	Integrin beta-1	N520	Hex(6)HexNAc(2)	N-terminus
P05556	Integrin beta-1	N520	Hex(7)HexNAc(2)	N-terminus
P05556	Integrin beta-1	N520	Hex(8)HexNAc(2)	N-terminus
P05556	Integrin beta-1	N520	Hex(9)HexNAc(2)	N-terminus
P05556	Integrin beta-1	N520	Hex(6)HexNAc(3)NeuAc(1)	N-terminus
P05556	Integrin beta-1	N669	Hex(5)HexNAc(4)Fuc(1)NeuAc(1)	N-terminus
P05556	Integrin beta-1	N669	Hex(5)HexNAc(4)Fuc(1)NeuAc(2)	N-terminus
P05556	Integrin beta-1	N669	Hex(5)HexNAc(4)Fuc(2)NeuAc(1)	N-terminus
P05556	Integrin beta-1	N669	Hex(5)HexNAc(4)Fuc(3)NeuAc(1)	N-terminus
P05556	Integrin beta-1	N669	Hex(6)HexNAc(2)	N-terminus
P05556	Integrin beta-1	N669	Hex(6)HexNAc(5)Fuc(1)NeuAc(1)	N-terminus
P05556	Integrin beta-1	N669	Hex(6)HexNAc(5)Fuc(2)NeuAc(1)	N-terminus
P05556	Integrin beta-1	N669	Hex(6)HexNAc(5)Fuc(3)NeuAc(1)	N-terminus
P05556	Integrin beta-1	N669	Hex(6)HexNAc(5)Fuc(4)NeuAc(1)	N-terminus
P05556	Integrin beta-1	N669	Hex(7)HexNAc(2)	N-terminus
P05556	Integrin beta-1	N669	Hex(7)HexNAc(6)Fuc(2)NeuAc(1)	N-terminus
P05556	Integrin beta-1	N669	Hex(7)HexNAc(6)Fuc(3)NeuAc(1)	N-terminus
P05556	Integrin beta-1	N669	Hex(7)HexNAc(6)Fuc(4)NeuAc(1)	N-terminus
P05556	Integrin beta-1	N669	Hex(7)HexNAc(6)NeuAc(2)	N-terminus
P05556	Integrin beta-1	N669	Hex(8)HexNAc(2)	N-terminus
P05556	Integrin beta-1	N669	Hex(9)HexNAc(2)	N-terminus
P05556	Integrin beta-1	N669	Hex(10)HexNAc(2)	N-terminus
P06756	Integrin alpha-V	N74	Hex(6)HexNAc(2)	N-terminus
P06756	Integrin alpha-V	N74	Hex(7)HexNAc(2)	N-terminus
P06756	Integrin alpha-V	N615	Hex(8)HexNAc(2)	N-terminus
P06756	Integrin alpha-V	N615	Hex(9)HexNAc(2)	N-terminus
P06756	Integrin alpha-V	N615	Hex(10)HexNAc(2)	N-terminus
P06756	Integrin alpha-V	N874	Hex(8)HexNAc(2)	N-terminus
P06756	Integrin alpha-V	N874	Hex(9)HexNAc(2)	N-terminus
P06756	Integrin alpha-V	N945	Hex(7)HexNAc(2)	N-terminus
P07602	Prosaposin	N80	Hex(3)HexNAc(3)	Extracellular
P07602	Prosaposin	N101	Hex(3)HexNAc(3)	Extracellular
P07602	Prosaposin	N215	Hex(3)HexNAc(2)Fuc(1)	Extracellular
P08195	4F2 cell-surface antigen heavy chain	N365	Hex(5)HexNAc(4)Fuc(1)NeuAc(2)	C-terminus
P08581	Hepatocyte growth factor receptor	N785	Hex(5)HexNAc(4)Fuc(2)NeuAc(1)	N-terminus
P08582	Melanotransferrin	N135	Hex(7)HexNAc(2)	Extracellular
P08582	Melanotransferrin	N135	Hex(8)HexNAc(2)	Extracellular
P08582	Melanotransferrin	N515	Hex(5)HexNAc(4)Fuc(1)NeuAc(1)	Extracellular
P08582	Melanotransferrin	N515	Hex(5)HexNAc(4)Fuc(1)NeuAc(2)	Extracellular
P08582	Melanotransferrin	N515	Hex(5)HexNAc(4)Fuc(2)NeuAc(1)	Extracellular
P08582	Melanotransferrin	N515	Hex(5)HexNAc(4)Fuc(3)NeuAc(1)	Extracellular
P08582	Melanotransferrin	N515	Hex(6)HexNAc(5)Fuc(3)NeuAc(1)	Extracellular
P08582	Melanotransferrin	N515	Hex(6)HexNAc(5)Fuc(4)NeuAc(1)	Extracellular
P08648	Integrin alpha-5	N868	Hex(5)HexNAc(4)Fuc(1)NeuAc(2)	N-terminus
P08648	Integrin alpha-5	N868	Hex(5)HexNAc(4)Fuc(2)NeuAc(1)	N-terminus
P08648	Integrin alpha-5	N868	Hex(5)HexNAc(4)NeuAc(2)	N-terminus
P08648	Integrin alpha-5	N868	Hex(9)HexNAc(2)	N-terminus
P09758	Tumor-associated calcium signal transducer 2	N120	Hex(5)HexNAc(6)	N-terminus
P09758	Tumor-associated calcium signal transducer 2	N120	Hex(6)HexNAc(2)	N-terminus
P09758	Tumor-associated calcium signal transducer 2	N120	Hex(7)HexNAc(2)	N-terminus
P09758	Tumor-associated calcium signal transducer 2	N120	Hex(8)HexNAc(2)	N-terminus
P09758	Tumor-associated calcium signal transducer 2	N168	Hex(5)HexNAc(4)Fuc(1)NeuAc(2)	N-terminus
P09758	Tumor-associated calcium signal transducer 2	N168	Hex(5)HexNAc(4)Fuc(2)NeuAc(1)	N-terminus
P09758	Tumor-associated calcium signal transducer 2	N168	Hex(5)HexNAc(4)NeuAc(2)	N-terminus
P09758	Tumor-associated calcium signal transducer 2	N168	Hex(6)HexNAc(5)Fuc(1)NeuAc(3)	N-terminus
P09758	Tumor-associated calcium signal transducer 2	N168	Hex(5)HexNAc(5)Fuc(2)NeuAc(2)	N-terminus
P09758	Tumor-associated calcium signal transducer 2	N168	Hex(6)HexNAc(5)Fuc(4)NeuAc(1)	N-terminus
P09758	Tumor-associated calcium signal transducer 2	N168	Hex(6)HexNAc(5)NeuAc(3)	N-terminus
P09758	Tumor-associated calcium signal transducer 2	N168	Hex(7)HexNAc(6)Fuc(1)NeuAc(3)	N-terminus
P09758	Tumor-associated calcium signal transducer 2	N168	Hex(8)HexNAc(2)	N-terminus
P09758	Tumor-associated calcium signal transducer 2	N168	Hex(9)HexNAc(2)	N-terminus
P09758	Tumor-associated calcium signal transducer 2	N168	Hex(10)HexNAc(2)	N-terminus
P10314	HLA class I histocompatibility antigen, A-32 alpha chain	N110	Hex(4)HexNAc(5)Fuc(2)NeuAc(1)	N-terminus
P10909	Clusterin	N291	Hex(7)HexNAc(2)	Extracellular
P10909	Clusterin	N291	Hex(8)HexNAc(2)	Extracellular
P11047	Laminin subunit gamma-1	N650	Hex(8)HexNAc(2)	Extracellular
P11047	Laminin subunit gamma-1	N650	Hex(9)HexNAc(2)	Extracellular
P11047	Laminin subunit gamma-1	N1107	Hex(8)HexNAc(2)	Extracellular
P11047	Laminin subunit gamma-1	N1205	Hex(8)HexNAc(2)	Extracellular
P11047	Laminin subunit gamma-1	N1223	Hex(8)HexNAc(2)	Extracellular
P11047	Laminin subunit gamma-1	N1241	Hex(8)HexNAc(2)	Extracellular
P11047	Laminin subunit gamma-1	N1395	Hex(8)HexNAc(2)	Extracellular
P11279	Lysosome-associated membrane glycoprotein 1	N84	Hex(4)HexNAc(3)Fuc(1)NeuAc(1)	N-terminus
P11279	Lysosome-associated membrane glycoprotein 1	N84	Hex(5)HexNAc(4)Fuc(1)NeuAc(1)	N-terminus
P11279	Lysosome-associated membrane glycoprotein 1	N84	Hex(5)HexNAc(4)Fuc(1)NeuAc(2)	N-terminus
P11279	Lysosome-associated membrane glycoprotein 1	N84	Hex(6)HexNAc(6)Fuc(2)NeuAc(3)	N-terminus
P11279	Lysosome-associated membrane glycoprotein 1	N84	Hex(6)HexNAc(6)NeuAc(3)	N-terminus
P11279	Lysosome-associated membrane glycoprotein 1	N84	Hex(7)HexNAc(6)Fuc(1)NeuAc(2)	N-terminus
P11279	Lysosome-associated membrane glycoprotein 1	N84	Hex(7)HexNAc(6)Fuc(1)NeuAc(3)	N-terminus
P11279	Lysosome-associated membrane glycoprotein 1	N84	Hex(7)HexNAc(6)Fuc(1)NeuAc(4)	N-terminus
P11279	Lysosome-associated membrane glycoprotein 1	N84	Hex(9)HexNAc(2)	N-terminus
P11279	Lysosome-associated membrane glycoprotein 1	N103	Hex(5)HexNAc(2)	N-terminus
P11279	Lysosome-associated membrane glycoprotein 1	N103	Hex(6)HexNAc(2)	N-terminus
P11279	Lysosome-associated membrane glycoprotein 1	N103	Hex(6)HexNAc(3)NeuAc(1)	N-terminus
P11279	Lysosome-associated membrane glycoprotein 1	N103	Hex(7)HexNAc(2)	N-terminus
P11279	Lysosome-associated membrane glycoprotein 1	N103	Hex(8)HexNAc(2)	N-terminus
P11279	Lysosome-associated membrane glycoprotein 1	N103	Hex(9)HexNAc(2)	N-terminus
P11279	Lysosome-associated membrane glycoprotein 1	N249	Hex(4)HexNAc(3)Fuc(1)	N-terminus
P11279	Lysosome-associated membrane glycoprotein 1	N249	Hex(4)HexNAc(3)Fuc(1)NeuAc(1)	N-terminus
P11279	Lysosome-associated membrane glycoprotein 1	N249	Hex(5)HexNAc(4)Fuc(1)NeuAc(2)	N-terminus
P11279	Lysosome-associated membrane glycoprotein 1	N249	Hex(5)HexNAc(4)Fuc(2)	N-terminus
P11279	Lysosome-associated membrane glycoprotein 1	N261	Hex(5)HexNAc(2)	N-terminus
P11279	Lysosome-associated membrane glycoprotein 1	N261	Hex(6)HexNAc(2)	N-terminus
P11279	Lysosome-associated membrane glycoprotein 1	N261	Hex(6)HexNAc(3)	N-terminus
P11279	Lysosome-associated membrane glycoprotein 1	N261	Hex(6)HexNAc(3)NeuAc(1)	N-terminus
P11279	Lysosome-associated membrane glycoprotein 1	N261	Hex(7)HexNAc(2)	N-terminus
P11279	Lysosome-associated membrane glycoprotein 1	N261	Hex(7)HexNAc(6)Fuc(1)	N-terminus
P11279	Lysosome-associated membrane glycoprotein 1	N261	Hex(8)HexNAc(2)	N-terminus
P11717	Cation-independent mannose-6-phosphate receptor	N400	Hex(7)HexNAc(2)	N-terminus
P11717	Cation-independent mannose-6-phosphate receptor	N400	Hex(8)HexNAc(2)	N-terminus
P11717	Cation-independent mannose-6-phosphate receptor	N400	Hex(9)HexNAc(2)	N-terminus
P11717	Cation-independent mannose-6-phosphate receptor	N581	Hex(7)HexNAc(2)	N-terminus
P11717	Cation-independent mannose-6-phosphate receptor	N581	Hex(8)HexNAc(2)	N-terminus
P11717	Cation-independent mannose-6-phosphate receptor	N747	Hex(9)HexNAc(2)	N-terminus
P11717	Cation-independent mannose-6-phosphate receptor	N871	Hex(5)HexNAc(4)Fuc(1)NeuAc(1)	N-terminus
P11717	Cation-independent mannose-6-phosphate receptor	N871	Hex(5)HexNAc(4)Fuc(2)NeuAc(1)	N-terminus
P11717	Cation-independent mannose-6-phosphate receptor	N871	Hex(5)HexNAc(4)Fuc(3)	N-terminus
P13473	Lysosome-associated membrane glycoprotein 2	N257	Hex(5)HexNAc(4)Fuc(1)	N-terminus
P13473	Lysosome-associated membrane glycoprotein 2	N257	Hex(5)HexNAc(4)Fuc(1)NeuAc(1)	N-terminus
P13473	Lysosome-associated membrane glycoprotein 2	N257	Hex(6)HexNAc(4)Fuc(1)NeuAc(1)	N-terminus
P13473	Lysosome-associated membrane glycoprotein 2	N257	Hex(6)HexNAc(4)Fuc(3)NeuAc(2)	N-terminus
P13473	Lysosome-associated membrane glycoprotein 2	N257	Hex(6)HexNAc(5)Fuc(1)	N-terminus
P13473	Lysosome-associated membrane glycoprotein 2	N257	Hex(6)HexNAc(5)Fuc(2)NeuAc(1)	N-terminus
P13473	Lysosome-associated membrane glycoprotein 2	N257	Hex(6)HexNAc(5)Fuc(2)NeuAc(2)	N-terminus
P13473	Lysosome-associated membrane glycoprotein 2	N257	Hex(6)HexNAc(5)Fuc(3)	N-terminus
P13473	Lysosome-associated membrane glycoprotein 2	N257	Hex(6)HexNAc(5)NeuAc(2)	N-terminus
P13473	Lysosome-associated membrane glycoprotein 2	N257	Hex(6)HexNAc(5)Fuc(4)NeuAc(1)	N-terminus
P13473	Lysosome-associated membrane glycoprotein 2	N257	Hex(6)HexNAc(6)NeuAc(3)	N-terminus
P13473	Lysosome-associated membrane glycoprotein 2	N257	Hex(7)HexNAc(5)Fuc(1)NeuAc(1)	N-terminus
P13473	Lysosome-associated membrane glycoprotein 2	N257	Hex(7)HexNAc(6)Fuc(1)	N-terminus
P13473	Lysosome-associated membrane glycoprotein 2	N257	Hex(7)HexNAc(6)Fuc(1)NeuAc(1)	N-terminus
P13473	Lysosome-associated membrane glycoprotein 2	N257	Hex(7)HexNAc(6)Fuc(1)NeuAc(2)	N-terminus
P13473	Lysosome-associated membrane glycoprotein 2	N257	Hex(7)HexNAc(5)Fuc(2)NeuAc(1)	N-terminus
P13473	Lysosome-associated membrane glycoprotein 2	N257	Hex(7)HexNAc(6)Fuc(2)	N-terminus
P13473	Lysosome-associated membrane glycoprotein 2	N257	Hex(7)HexNAc(6)Fuc(2)NeuAc(1)	N-terminus
P13473	Lysosome-associated membrane glycoprotein 2	N257	Hex(7)HexNAc(6)Fuc(3)	N-terminus
P13473	Lysosome-associated membrane glycoprotein 2	N257	Hex(7)HexNAc(6)Fuc(3)NeuAc(1)	N-terminus
P13473	Lysosome-associated membrane glycoprotein 2	N257	Hex(7)HexNAc(6)Fuc(4)	N-terminus
P13473	Lysosome-associated membrane glycoprotein 2	N257	Hex(7)HexNAc(6)NeuAc(1)	N-terminus
P13473	Lysosome-associated membrane glycoprotein 2	N257	Hex(7)HexNAc(7)Fuc(2)	N-terminus
P13473	Lysosome-associated membrane glycoprotein 2	N257	Hex(8)HexNAc(2)	N-terminus
P13473	Lysosome-associated membrane glycoprotein 2	N257	Hex(9)HexNAc(2)	N-terminus
P13473	Lysosome-associated membrane glycoprotein 2	N356	Hex(6)HexNAc(2)	N-terminus
P13473	Lysosome-associated membrane glycoprotein 2	N356	Hex(6)HexNAc(3)NeuAc(1)	N-terminus
P13473	Lysosome-associated membrane glycoprotein 2	N356	Hex(6)HexNAc(5)Fuc(2)	N-terminus
P13473	Lysosome-associated membrane glycoprotein 2	N356	Hex(7)HexNAc(2)	N-terminus
P13473	Lysosome-associated membrane glycoprotein 2	N356	Hex(8)HexNAc(2)	N-terminus
P13688	Carcinoembryonic antigen-related cell adhesion molecule 1	N378	Hex(8)HexNAc(2)	N-terminus
P13987	CD59 glycoprotein	N43	Hex(5)HexNAc(4)Fuc(1)NeuAc(1)	Extracellular
P13987	CD59 glycoprotein	N43	Hex(5)HexNAc(4)Fuc(1)NeuAc(2)	Extracellular
P13987	CD59 glycoprotein	N43	Hex(5)HexNAc(4)Fuc(2)NeuAc(1)	Extracellular
P13987	CD59 glycoprotein	N43	Hex(6)HexNAc(4)Fuc(3)	Extracellular
P13987	CD59 glycoprotein	N43	Hex(6)HexNAc(4)Fuc(1)NeuAc(1)	Extracellular
P15144	Aminopeptidase N	N128	Hex(5)HexNAc(2)	C-terminus
P15144	Aminopeptidase N	N128	Hex(5)HexNAc(4)	C-terminus
P15144	Aminopeptidase N	N128	Hex(5)HexNAc(4)Fuc(1)	C-terminus
P15144	Aminopeptidase N	N128	Hex(5)HexNAc(4)Fuc(1)NeuAc(1)	C-terminus
P15144	Aminopeptidase N	N128	Hex(5)HexNAc(4)Fuc(2)	C-terminus
P15144	Aminopeptidase N	N128	Hex(5)HexNAc(4)NeuAc(1)	C-terminus
P15144	Aminopeptidase N	N128	Hex(5)HexNAc(4)NeuAc(2)	C-terminus
P15144	Aminopeptidase N	N128	Hex(5)HexNAc(5)	C-terminus
P15144	Aminopeptidase N	N128	Hex(6)HexNAc(2)	C-terminus
P15144	Aminopeptidase N	N128	Hex(6)HexNAc(3)NeuAc(1)	C-terminus
P15144	Aminopeptidase N	N128	Hex(7)HexNAc(2)	C-terminus
P15144	Aminopeptidase N	N128	Hex(8)HexNAc(2)	C-terminus
P15144	Aminopeptidase N	N128	Hex(9)HexNAc(2)	C-terminus
P15144	Aminopeptidase N	N234	Hex(5)HexNAc(3)Fuc(1)	C-terminus
P15144	Aminopeptidase N	N234	Hex(5)HexNAc(4)Fuc(1)	C-terminus
P15144	Aminopeptidase N	N234	Hex(5)HexNAc(4)Fuc(2)	C-terminus
P15144	Aminopeptidase N	N234	Hex(5)HexNAc(4)NeuAc(1)	C-terminus
P15144	Aminopeptidase N	N234	Hex(6)HexNAc(3)NeuAc(1)	C-terminus
P15144	Aminopeptidase N	N234	Hex(6)HexNAc(5)NeuAc(2)	C-terminus
P15144	Aminopeptidase N	N234	Hex(7)HexNAc(2)	C-terminus
P15144	Aminopeptidase N	N265	Hex(5)HexNAc(4)Fuc(1)NeuAc(1)	C-terminus
P15144	Aminopeptidase N	N265	Hex(5)HexNAc(4)NeuAc(1)	C-terminus
P15144	Aminopeptidase N	N265	Hex(5)HexNAc(4)NeuAc(2)	C-terminus
P15144	Aminopeptidase N	N265	Hex(5)HexNAc(5)Fuc(1)NeuAc(2)	C-terminus
P15144	Aminopeptidase N	N265	Hex(6)HexNAc(4)Fuc(2)NeuAc(2)	C-terminus
P15144	Aminopeptidase N	N265	Hex(6)HexNAc(5)Fuc(1)NeuAc(1)	C-terminus
P15144	Aminopeptidase N	N265	Hex(6)HexNAc(5)Fuc(1)NeuAc(2)	C-terminus
P15144	Aminopeptidase N	N265	Hex(6)HexNAc(5)Fuc(2)NeuAc(2)	C-terminus
P15144	Aminopeptidase N	N265	Hex(6)HexNAc(5)NeuAc(1)	C-terminus
P15144	Aminopeptidase N	N265	Hex(6)HexNAc(5)NeuAc(2)	C-terminus
P15144	Aminopeptidase N	N265	Hex(6)HexNAc(5)NeuAc(3)	C-terminus
P15144	Aminopeptidase N	N265	Hex(7)HexNAc(6)Fuc(1)NeuAc(3)	C-terminus
P15144	Aminopeptidase N	N265	Hex(7)HexNAc(6)NeuAc(2)	C-terminus
P15144	Aminopeptidase N	N265	Hex(7)HexNAc(6)NeuAc(3)	C-terminus
P15144	Aminopeptidase N	N265	Hex(7)HexNAc(6)NeuAc(4)	C-terminus
P15144	Aminopeptidase N	N265	Hex(9)HexNAc(2)	C-terminus
P15144	Aminopeptidase N	N818	Hex(7)HexNAc(6)Fuc(1)NeuAc(2)	C-terminus
P15151	Poliovirus receptor	N120	Hex(5)HexNAc(4)Fuc(2)NeuAc(1)	N-terminus
P15151	Poliovirus receptor	N120	Hex(5)HexNAc(4)Fuc(3)NeuAc(1)	N-terminus
P15151	Poliovirus receptor	N120	Hex(6)HexNAc(5)Fuc(1)NeuAc(3)	N-terminus
P16070	CD44 antigen	N57	Hex(5)HexNAc(4)Fuc(1)NeuAc(2)	N-terminus
P16144	Integrin beta-4	N327	Hex(5)HexNAc(4)Fuc(1)NeuAc(1)	N-terminus
P16144	Integrin beta-4	N327	Hex(5)HexNAc(4)Fuc(3)	N-terminus
P16144	Integrin beta-4	N327	Hex(5)HexNAc(6)	N-terminus
P16144	Integrin beta-4	N695	Hex(5)HexNAc(5)Fuc(1)NeuAc(1)	N-terminus
P16422	Epithelial cell adhesion molecule	N111	Hex(8)HexNAc(2)	N-terminus
P17301	Integrin alpha-2	N343	Hex(5)HexNAc(4)NeuAc(1)	N-terminus
P17301	Integrin alpha-2	N432	Hex(7)HexNAc(2)Fuc(1)	N-terminus
P17301	Integrin alpha-2	N432	Hex(8)HexNAc(2)	N-terminus
P17301	Integrin alpha-2	N432	Hex(7)HexNAc(2)	N-terminus
P17301	Integrin alpha-2	N432	Hex(8)HexNAc(2)	N-terminus
P17936	Insulin-like growth factor-binding protein 3	N136	Hex(8)HexNAc(2)	Extracellular
P18084	Integrin beta-5	N586	Hex(6)HexNAc(2)	N-terminus
P18084	Integrin beta-5	N586	Hex(7)HexNAc(2)Fuc(1)	N-terminus
P18084	Integrin beta-5	N586	Hex(8)HexNAc(2)	N-terminus
P18084	Integrin beta-5	N654	Hex(8)HexNAc(2)	N-terminus
P18084	Integrin beta-5	N654	Hex(5)HexNAc(4)Fuc(1)NeuAc(1)	N-terminus
P18465	HLA class I histocompatibility antigen, B-57 alpha chain	N110	Hex(4)HexNAc(5)Fuc(2)NeuAc(1)	N-terminus
P21860	Receptor tyrosine-protein kinase erbB-3	N250	Hex(7)HexNAc(2)	N-terminus
P23229	Integrin alpha-6	N323	Hex(8)HexNAc(2)	N-terminus
P23229	Integrin alpha-6	N770	Hex(5)HexNAc(4)Fuc(1)	N-terminus
P23229	Integrin alpha-6	N770	Hex(5)HexNAc(4)Fuc(1)NeuAc(1)	N-terminus
P23229	Integrin alpha-6	N770	Hex(7)HexNAc(2)	N-terminus
P23229	Integrin alpha-6	N966	Hex(8)HexNAc(2)	N-terminus
P26006	Integrin alpha-3	N86	Hex(5)HexNAc(4)Fuc(1)NeuAc(2)	N-terminus
P26006	Integrin alpha-3	N86	Hex(9)HexNAc(2)	N-terminus
P26006	Integrin alpha-3	N86	Hex(10)HexNAc(2)	N-terminus
P26006	Integrin alpha-3	N107	Hex(6)HexNAc(5)Fuc(1)NeuAc(3)	N-terminus
P26006	Integrin alpha-3	N107	Hex(9)HexNAc(2)	N-terminus
P26006	Integrin alpha-3	N265	Hex(5)HexNAc(3)NeuAc(1)	N-terminus
P26006	Integrin alpha-3	N265	Hex(5)HexNAc(4)Fuc(1)NeuAc(1)	N-terminus
P26006	Integrin alpha-3	N265	Hex(5)HexNAc(4)Fuc(1)NeuAc(2)	N-terminus
P26006	Integrin alpha-3	N265	Hex(5)HexNAc(4)NeuAc(1)	N-terminus
P26006	Integrin alpha-3	N265	Hex(5)HexNAc(4)NeuAc(2)	N-terminus
P26006	Integrin alpha-3	N265	Hex(6)HexNAc(2)	N-terminus
P26006	Integrin alpha-3	N265	Hex(6)HexNAc(4)Fuc(1)NeuAc(1)	N-terminus
P26006	Integrin alpha-3	N511	Hex(4)HexNAc(5)Fuc(2)	N-terminus
P26006	Integrin alpha-3	N511	Hex(5)HexNAc(4)Fuc(1)NeuAc(1)	N-terminus
P26006	Integrin alpha-3	N511	Hex(5)HexNAc(4)Fuc(2)	N-terminus
P26006	Integrin alpha-3	N511	Hex(5)HexNAc(4)Fuc(2)NeuAc(1)	N-terminus
P26006	Integrin alpha-3	N511	Hex(5)HexNAc(4)NeuAc(2)	N-terminus
P26006	Integrin alpha-3	N605	Hex(6)HexNAc(2)	N-terminus
P26006	Integrin alpha-3	N605	Hex(7)HexNAc(2)	N-terminus
P26006	Integrin alpha-3	N605	Hex(8)HexNAc(2)	N-terminus
P26006	Integrin alpha-3	N605	Hex(9)HexNAc(2)	N-terminus
P26006	Integrin alpha-3	N926	Hex(5)HexNAc(4)	N-terminus
P26006	Integrin alpha-3	N926	Hex(6)HexNAc(5)Fuc(1)	N-terminus
P26006	Integrin alpha-3	N926	Hex(6)HexNAc(5)Fuc(1)NeuAc(1)	N-terminus
P26006	Integrin alpha-3	N926	Hex(6)HexNAc(5)Fuc(2)	N-terminus
P26006	Integrin alpha-3	N926	Hex(6)HexNAc(5)Fuc(3)	N-terminus
P26006	Integrin alpha-3	N926	Hex(6)HexNAc(5)NeuAc(1)	N-terminus
P26006	Integrin alpha-3	N926	Hex(8)HexNAc(2)	N-terminus
P26006	Integrin alpha-3	N926	Hex(9)HexNAc(2)	N-terminus
P26006	Integrin alpha-3	N969	Hex(6)HexNAc(5)Fuc(1)NeuAc(1)	N-terminus
P26006	Integrin alpha-3	N969	Hex(7)HexNAc(2)	N-terminus
P26012	Integrin beta-8	N456	Hex(8)HexNAc(2)	N-terminus
P26927	Hepatocyte growth factor-like protein	N296	Hex(6)HexNAc(4)NeuAc(1)	N-terminus
P28799	Granulins	N530	Hex(8)HexNAc(2)	Extracellular
P28799	Granulins	N530	Hex(9)HexNAc(2)	Extracellular
P30450 / P30457 / Q29865 / P30504 / P10321	HLA class I histocompatibility antigen, A-26 / A-66 / Cw-18 / Cw-4 / Cw-7 alpha chain	N110	Hex(4)HexNAc(5)Fuc(2)NeuAc(1)	N-terminus
P30450 / P30457 / Q29865 / P30504 / P10321	HLA class I histocompatibility antigen, A-26 / A-66 / Cw-18 / Cw-4 / Cw-7 alpha chain	N110	Hex(5)HexNAc(4)Fuc(1)NeuAc(2)	N-terminus
P30450 / P30457 / Q29865 / P30504 / P10321	HLA class I histocompatibility antigen, A-26 / A-66 / Cw-18 / Cw-4 / Cw-7 alpha chain	N110	Hex(8)HexNAc(2)	N-terminus
P30450 / P30457 / Q29865 / P30504 / P10321	HLA class I histocompatibility antigen, A-26 / A-66 / Cw-18 / Cw-4 / Cw-7 alpha chain	N110	Hex(9)HexNAc(2)	N-terminus
P30450 / P30457 / Q29865 / P30504 / P10321	HLA class I histocompatibility antigen, A-26 / A-66 / Cw-18 / Cw-4 / Cw-7 alpha chain	N110	Hex(10)HexNAc(2)	N-terminus
P30462	HLA class I histocompatibility antigen, B-14 alpha chain	N110	Hex(4)HexNAc(6)	N-terminus
P30462	HLA class I histocompatibility antigen, B-14 alpha chain	N110	Hex(5)HexNAc(4)NeuAc(2)	N-terminus
P30462	HLA class I histocompatibility antigen, B-14 alpha chain	N110	Hex(8)HexNAc(2)	N-terminus
P30479	HLA class I histocompatibility antigen, B-41 alpha chain	N110	Hex(6)HexNAc(4)Fuc(1)	N-terminus
P30511	HLA class I histocompatibility antigen, alpha chain	N107	Hex(9)HexNAc(2)	N-terminus
P32004	Neural cell adhesion molecule L1	N247	Hex(5)HexNAc(4)Fuc(2)NeuAc(1)	N-terminus
P32004	Neural cell adhesion molecule L1	N979	Hex(4)HexNAc(4)Fuc(2)	N-terminus
P32004	Neural cell adhesion molecule L1	N979	Hex(4)HexNAc(5)Fuc(1)NeuAc(1)	N-terminus
P32004	Neural cell adhesion molecule L1	N979	Hex(4)HexNAc(5)Fuc(1)	N-terminus
P32004	Neural cell adhesion molecule L1	N979	Hex(4)HexNAc(5)Fuc(3)	N-terminus
P32004	Neural cell adhesion molecule L1	N979	Hex(5)HexNAc(4)Fuc(1)NeuAc(1)	N-terminus
P32004	Neural cell adhesion molecule L1	N979	Hex(5)HexNAc(4)Fuc(2)	N-terminus
P32004	Neural cell adhesion molecule L1	N979	Hex(5)HexNAc(4)Fuc(2)NeuAc(1)	N-terminus
P32004	Neural cell adhesion molecule L1	N979	Hex(5)HexNAc(4)Fuc(3)	N-terminus
P32004	Neural cell adhesion molecule L1	N979	Hex(5)HexNAc(5)Fuc(1)NeuAc(1)	N-terminus
P32004	Neural cell adhesion molecule L1	N979	Hex(5)HexNAc(5)Fuc(3)	N-terminus
P32004	Neural cell adhesion molecule L1	N979	Hex(5)HexNAc(6)Fuc(4)	N-terminus
P32004	Neural cell adhesion molecule L1	N979	Hex(6)HexNAc(5)Fuc(3)NeuAc(1)	N-terminus
P32004	Neural cell adhesion molecule L1	N979	Hex(6)HexNAc(5)Fuc(4)	N-terminus
P32004	Neural cell adhesion molecule L1	N979	Hex(6)HexNAc(6)Fuc(4)	N-terminus
P32004	Neural cell adhesion molecule L1	N979	Hex(9)HexNAc(2)	N-terminus
P36941	Tumor necrosis factor receptor superfamily member 3	N177	Hex(9)HexNAc(2)	N-terminus
P42261	Glutamate receptor 1	N401	Hex(3)HexNAc(7)Fuc(1)	Loop
P42892	Endothelin-converting enzyme 1	N166	Hex(5)HexNAc(4)Fuc(1)	C-terminus
P42892	Endothelin-converting enzyme 1	N166	Hex(5)HexNAc(4)Fuc(1)NeuAc(1)	C-terminus
P42892	Endothelin-converting enzyme 1	N166	Hex(5)HexNAc(4)Fuc(2)NeuAc(1)	C-terminus
P42892	Endothelin-converting enzyme 1	N166	Hex(6)HexNAc(2)	C-terminus
P42892	Endothelin-converting enzyme 1	N166	Hex(7)HexNAc(2)	C-terminus
P42892	Endothelin-converting enzyme 1	N166	Hex(8)HexNAc(2)	C-terminus
P42892	Endothelin-converting enzyme 1	N166	Hex(9)HexNAc(2)	C-terminus
P42892	Endothelin-converting enzyme 1	N166	Hex(10)HexNAc(2)	C-terminus
P48509	CD151 antigen	N159	Hex(4)HexNAc(4)Fuc(2)NeuAc(1)	Loop
P48509	CD151 antigen	N159	Hex(5)HexNAc(4)Fuc(1)	Loop
P48509	CD151 antigen	N159	Hex(5)HexNAc(4)Fuc(1)NeuAc(1)	Loop
P48509	CD151 antigen	N159	Hex(5)HexNAc(4)Fuc(2)	Loop
P48509	CD151 antigen	N159	Hex(5)HexNAc(4)Fuc(3)	Loop
P48509	CD151 antigen	N159	Hex(5)HexNAc(4)NeuAc(1)	Loop
P48509	CD151 antigen	N159	Hex(5)HexNAc(4)NeuAc(2)	Loop
P48509	CD151 antigen	N159	Hex(5)HexNAc(5)Fuc(1)NeuAc(2)	Loop
P48509	CD151 antigen	N159	Hex(5)HexNAc(5)Fuc(2)NeuAc(2)	Loop
P48509	CD151 antigen	N159	Hex(5)HexNAc(5)Fuc(4)NeuAc(1)	Loop
P48509	CD151 antigen	N159	Hex(6)HexNAc(5)Fuc(1)NeuAc(1)	Loop
P48509	CD151 antigen	N159	Hex(6)HexNAc(5)Fuc(1)NeuAc(2)	Loop
P48509	CD151 antigen	N159	Hex(6)HexNAc(5)Fuc(2)NeuAc(1)	Loop
P48509	CD151 antigen	N159	Hex(6)HexNAc(5)Fuc(2)NeuAc(2)	Loop
P48509	CD151 antigen	N159	Hex(6)HexNAc(5)Fuc(3)NeuAc(1)	Loop
P48509	CD151 antigen	N159	Hex(6)HexNAc(5)NeuAc(3)	Loop
P48509	CD151 antigen	N159	Hex(7)HexNAc(2)	Loop
P48509	CD151 antigen	N159	Hex(7)HexNAc(7)Fuc(1)	Loop
P48960	CD97 antigen	N33	Hex(6)HexNAc(5)Fuc(3)NeuAc(1)	Loop
P48960	CD97 antigen	N108	Hex(5)HexNAc(4)Fuc(1)NeuAc(2)	Loop
P53801	Pituitary tumor-transforming gene 1 protein-interacting protein	N54	Hex(6)HexNAc(2)	N-terminus
P53801	Pituitary tumor-transforming gene 1 protein-interacting protein	N54	Hex(7)HexNAc(2)	N-terminus
P53801	Pituitary tumor-transforming gene 1 protein-interacting protein	N54	Hex(8)HexNAc(2)	N-terminus
P54709	Sodium/potassium-transporting ATPase subunit beta-3	N124	Hex(5)HexNAc(4)Fuc(1)NeuAc(1)	C-terminus
P54709	Sodium/potassium-transporting ATPase subunit beta-3	N124	Hex(5)HexNAc(4)Fuc(1)NeuAc(2)	C-terminus
P54709	Sodium/potassium-transporting ATPase subunit beta-3	N124	Hex(5)HexNAc(4)Fuc(2)	C-terminus
P54709	Sodium/potassium-transporting ATPase subunit beta-3	N124	Hex(5)HexNAc(4)Fuc(2)NeuAc(1)	C-terminus
P54709	Sodium/potassium-transporting ATPase subunit beta-3	N124	Hex(5)HexNAc(4)Fuc(3)	C-terminus
P54709	Sodium/potassium-transporting ATPase subunit beta-3	N124	Hex(5)HexNAc(4)Fuc(3)NeuAc(1)	C-terminus
P54709	Sodium/potassium-transporting ATPase subunit beta-3	N124	Hex(6)HexNAc(4)Fuc(1)NeuAc(1)	C-terminus
P54709	Sodium/potassium-transporting ATPase subunit beta-3	N124	Hex(6)HexNAc(4)Fuc(3)	C-terminus
P54709	Sodium/potassium-transporting ATPase subunit beta-3	N124	Hex(6)HexNAc(5)Fuc(1)NeuAc(1)	C-terminus
P54709	Sodium/potassium-transporting ATPase subunit beta-3	N124	Hex(6)HexNAc(5)Fuc(1)NeuAc(2)	C-terminus
P54709	Sodium/potassium-transporting ATPase subunit beta-3	N124	Hex(6)HexNAc(5)Fuc(2)	C-terminus
P54709	Sodium/potassium-transporting ATPase subunit beta-3	N124	Hex(6)HexNAc(5)Fuc(3)	C-terminus
P54709	Sodium/potassium-transporting ATPase subunit beta-3	N124	Hex(7)HexNAc(6)Fuc(1)NeuAc(1)	C-terminus
P54709	Sodium/potassium-transporting ATPase subunit beta-3	N124	Hex(7)HexNAc(6)Fuc(4)	C-terminus
P54709	Sodium/potassium-transporting ATPase subunit beta-3	N124	Hex(7)HexNAc(6)Fuc(5)	C-terminus
P54709	Sodium/potassium-transporting ATPase subunit beta-3	N124	Hex(7)HexNAc(6)Fuc(3)NeuAc(1)	C-terminus
P54709	Sodium/potassium-transporting ATPase subunit beta-3	N124	Hex(7)HexNAc(6)NeuAc(2)	C-terminus
P54709	Sodium/potassium-transporting ATPase subunit beta-3	N124	Hex(8)HexNAc(2)	C-terminus
P55899	IgG receptor FcRn large subunit p51	N125	Hex(4)HexNAc(5)Fuc(2)NeuAc(1)	N-terminus
P56199	Integrin alpha-1	N460	Hex(9)HexNAc(2)	N-terminus
P56199	Integrin alpha-1	N1113	Hex(8)HexNAc(2)	N-terminus
P61812	Transforming growth factor beta-2	N241	Hex(8)HexNAc(2)	Extracellular
P78357	Contactin-associated protein 1	N1147	Hex(9)HexNAc(2)	N-terminus
P78410	Butyrophilin subfamily 3 member A2	N115	Hex(8)HexNAc(2)	N-terminus
P78536	Disintegrin and metalloproteinase domain-containing protein 17	N103	Hex(8)HexNAc(2)	N-terminus
P78536	Disintegrin and metalloproteinase domain-containing protein 17	N174	Hex(8)HexNAc(2)	N-terminus
P78536	Disintegrin and metalloproteinase domain-containing protein 17	N539	Hex(8)HexNAc(2)	N-terminus
P78536	Disintegrin and metalloproteinase domain-containing protein 17	N594	Hex(7)HexNAc(2)	N-terminus
P78536	Disintegrin and metalloproteinase domain-containing protein 17	N594	Hex(8)HexNAc(2)	N-terminus
Q06481	Amyloid-like protein 2	N541	Hex(9)HexNAc(2)	N-terminus
Q07954	Prolow-density lipoprotein receptor-related protein 1	N4075	Hex(6)HexNAc(2)	N-terminus
Q07954	Prolow-density lipoprotein receptor-related protein 1	N4075	Hex(8)HexNAc(2)	N-terminus
Q08380	Galectin-3-binding protein	N69	Hex(8)HexNAc(2)	Extracellular
Q08380	Galectin-3-binding protein	N69	Hex(9)HexNAc(2)	Extracellular
Q08380	Galectin-3-binding protein	N125	Hex(6)HexNAc(2)	Extracellular
Q08380	Galectin-3-binding protein	N125	Hex(7)HexNAc(2)	Extracellular
Q08380	Galectin-3-binding protein	N125	Hex(8)HexNAc(2)	Extracellular
Q08380	Galectin-3-binding protein	N125	Hex(9)HexNAc(2)	Extracellular
Q08380	Galectin-3-binding protein	N398	Hex(8)HexNAc(2)	Extracellular
Q08380	Galectin-3-binding protein	N398	Hex(9)HexNAc(2)	Extracellular
Q08380	Galectin-3-binding protein	N398	Hex(10)HexNAc(2)	Extracellular
Q08380	Galectin-3-binding protein	N551	Hex(7)HexNAc(2)	Extracellular
Q08380	Galectin-3-binding protein	N551	Hex(8)HexNAc(2)	Extracellular
Q08380	Galectin-3-binding protein	N551	Hex(9)HexNAc(2)	Extracellular
Q08380	Galectin-3-binding protein	N551	Hex(10)HexNAc(2)	Extracellular
Q08380	Galectin-3-binding protein	N580	Hex(9)HexNAc(2)	Extracellular
Q08722	Leukocyte surface antigen CD47	N73	Hex(6)HexNAc(3)Fuc(1)	Loop
Q08722	Leukocyte surface antigen CD47	N73	Hex(7)HexNAc(2)	Loop
Q08722	Leukocyte surface antigen CD47	N73	Hex(8)HexNAc(2)	Loop
Q10589	Bone marrow stromal antigen 2	N65	Hex(8)HexNAc(2)	C-terminus
Q12907	Vesicular integral-membrane protein	N183	Hex(3)HexNAc(5)	N-terminus
Q12907	Vesicular integral-membrane protein	N183	Hex(4)HexNAc(5)Fuc(1)	N-terminus
Q12907	Vesicular integral-membrane protein	N183	Hex(5)HexNAc(5)NeuAc(1)	N-terminus
Q12907	Vesicular integral-membrane protein	N183	Hex(3)HexNAc(6)	N-terminus
Q12907	Vesicular integral-membrane protein	N183	Hex(5)HexNAc(5)Fuc(2)	N-terminus
Q12907	Vesicular integral-membrane protein	N183	Hex(5)HexNAc(5)Fuc(1)	N-terminus
Q13308	Inactive tyrosine-protein kinase 7	N646	Hex(6)HexNAc(2)	N-terminus
Q13443	Disintegrin and metalloproteinase domain-containing protein 9	N381	Hex(8)HexNAc(2)	N-terminus
Q13641	Trophoblast glycoprotein	N275	Hex(5)HexNAc(5)Fuc(2)NeuAc(2)	N-terminus
Q13641	Trophoblast glycoprotein	N275	Hex(6)HexNAc(5)Fuc(1)NeuAc(2)	N-terminus
Q13641	Trophoblast glycoprotein	N275	Hex(6)HexNAc(5)Fuc(2)NeuAc(1)	N-terminus
Q13641	Trophoblast glycoprotein	N275	Hex(6)HexNAc(5)Fuc(2)NeuAc(2)	N-terminus
Q13740	CD166 antigen	N167	Hex(5)HexNAc(4)Fuc(2)NeuAc(1)	N-terminus
Q13740	CD166 antigen	N167	Hex(5)HexNAc(4)NeuAc(2)	N-terminus
Q13740	CD166 antigen	N167	Hex(5)HexNAc(4)Fuc(3)NeuAc(1)	N-terminus
Q13740	CD166 antigen	N167	Hex(5)HexNAc(5)Fuc(3)	N-terminus
Q13740	CD166 antigen	N167	Hex(5)HexNAc(5)Fuc(1)NeuAc(1)	N-terminus
Q13740	CD166 antigen	N167	Hex(5)HexNAc(3)Fuc(1)	N-terminus
Q13740	CD166 antigen	N480	Hex(5)HexNAc(4)Fuc(1)NeuAc(1)	N-terminus
Q13740	CD166 antigen	N480	Hex(5)HexNAc(4)Fuc(2)NeuAc(1)	N-terminus
Q13740	CD166 antigen	N480	Hex(5)HexNAc(4)Fuc(3)	N-terminus
Q13740	CD166 antigen	N480	Hex(6)HexNAc(5)Fuc(1)NeuAc(1)	N-terminus
Q13740	CD166 antigen	N480	Hex(6)HexNAc(5)Fuc(1)NeuAc(2)	N-terminus
Q13740	CD166 antigen	N480	Hex(8)HexNAc(2)	N-terminus
Q13740	CD166 antigen	N480	Hex(9)HexNAc(2)	N-terminus
Q14118	Dystroglycan	N141	Hex(8)HexNAc(2)	Extracellular
Q14126	Desmoglein-2	N182	Hex(4)HexNAc(5)Fuc(2)	N-terminus
Q14126	Desmoglein-2	N182	Hex(4)HexNAc(5)Fuc(3)	N-terminus
Q14126	Desmoglein-2	N182	Hex(5)HexNAc(4)Fuc(1)NeuAc(1)	N-terminus
Q14126	Desmoglein-2	N182	Hex(5)HexNAc(4)Fuc(1)NeuAc(2)	N-terminus
Q16563	Synaptophysin-like protein 1	N71	Hex(6)HexNAc(3)NeuAc(1)	Loop
Q16563	Synaptophysin-like protein 1	N71	Hex(7)HexNAc(2)	Loop
Q5ZPR3	CD276 antigen	N91	Hex(5)HexNAc(4)Fuc(1)NeuAc(2)	N-terminus
Q5ZPR3	CD276 antigen	N322	Hex(4)HexNAc(5)Fuc(2)NeuAc(1)	N-terminus
Q6YHK3	CD109 antigen	N247	Hex(8)HexNAc(2)	Extracellular
Q6YHK3	CD109 antigen	N337	Hex(8)HexNAc(2)	Extracellular
Q6YHK3	CD109 antigen	N419	Hex(9)HexNAc(2)	Extracellular
Q6YHK3	CD109 antigen	N1086	Hex(9)HexNAc(2)	Extracellular
Q6ZRP7	Sulfhydryl oxidase 2	N266	Hex(5)HexNAc(4)Fuc(2)NeuAc(2)	N-terminus
Q7Z408	CUB and sushi domain-containing protein 2	N680	Hex(5)HexNAc(4)NeuAc(2)	N-terminus
Q8IWA5	Choline transporter-like protein 2	N417	Hex(5)HexNAc(4)Fuc(2)NeuAc(1)	Loop
Q8IWA5	Choline transporter-like protein 2	N417	Hex(8)HexNAc(2)	Loop
Q8IWB1	Inositol 1,4,5-trisphosphate receptor-interacting protein	N27	Hex(8)HexNAc(2)	Extracellular
Q8IZA0	Dyslexia-associated protein KIAA0319-like protein	N890	Hex(7)HexNAc(2)	Loop
Q8IZA0	Dyslexia-associated protein KIAA0319-like protein	N890	Hex(8)HexNAc(2)	Loop
Q8WWI5	Choline transporter-like protein 1	N135	Hex(6)HexNAc(2)	Loop
Q8WWI5	Choline transporter-like protein 1	N135	Hex(7)HexNAc(2)	Loop
Q92542	Nicastrin	N45	Hex(8)HexNAc(2)	N-terminus
Q92542	Nicastrin	N45	Hex(9)HexNAc(2)	N-terminus
Q92542	Nicastrin	N45	Hex(10)HexNAc(2)	N-terminus
Q92542	Nicastrin	N435	Hex(6)HexNAc(2)	N-terminus
Q92542	Nicastrin	N435	Hex(7)HexNAc(2)	N-terminus
Q92542	Nicastrin	N435	Hex(8)HexNAc(2)	N-terminus
Q92542	Nicastrin	N435	Hex(9)HexNAc(2)	N-terminus
Q92542	Nicastrin	N530	Hex(9)HexNAc(2)	N-terminus
Q92626	Peroxidasin homolog	N1178	Hex(8)HexNAc(2)	Extracellular
Q92626	Peroxidasin homolog	N1368	Hex(8)HexNAc(2)	Extracellular
Q96J42	Thioredoxin domain-containing protein 15	N165	Hex(8)HexNAc(2)	N-terminus
Q96J42	Thioredoxin domain-containing protein 15	N293	Hex(8)HexNAc(2)	N-terminus
Q96KA5	Cleft lip and palate transmembrane protein 1-like protein	N91	Hex(8)HexNAc(2)	Loop
Q96KA5	Cleft lip and palate transmembrane protein 1-like protein	N229	Hex(8)HexNAc(2)	Loop
Q99523	Sortilin	N406	Hex(9)HexNAc(2)	N-terminus
Q99523	Sortilin	N406	Hex(10)HexNAc(2)	N-terminus
Q9H0X4	Protein ITFG3	N389	Hex(8)HexNAc(2)	C-terminus
Q9H330	Transmembrane protein 245	N551	Hex(8)HexNAc(2)	Loop
Q9H5V8	CUB domain-containing protein 1	N122	Hex(3)HexNAc(6)	N-terminus
Q9H5V8	CUB domain-containing protein 1	N122	Hex(8)HexNAc(2)	N-terminus
Q9H5V8	CUB domain-containing protein 1	N339	Hex(9)HexNAc(2)	N-terminus
Q9H5V8	CUB domain-containing protein 1	N477	Hex(5)HexNAc(4)Fuc(2)NeuAc(1)	N-terminus
Q9H5V8	CUB domain-containing protein 1	N477	Hex(5)HexNAc(4)NeuAc(2)	N-terminus
Q9H5V8	CUB domain-containing protein 1	N512	Hex(8)HexNAc(2)	N-terminus
Q9H5V8	CUB domain-containing protein 1	N639	Hex(8)HexNAc(2)	N-terminus
Q9HAV5	Tumor necrosis factor receptor superfamily member 27	N74	Hex(5)HexNAc(4)Fuc(1)NeuAc(2)	N-terminus
Q9HAV5	Tumor necrosis factor receptor superfamily member 27	N74	Hex(5)HexNAc(4)Fuc(2)NeuAc(1)	N-terminus
Q9HAV5	Tumor necrosis factor receptor superfamily member 27	N74	Hex(6)HexNAc(5)Fuc(1)NeuAc(1)	N-terminus
Q9HDC9	Adipocyte plasma membrane-associated protein	N160	Hex(3)HexNAc(3)Fuc(1)	C-terminus
Q9HDC9	Adipocyte plasma membrane-associated protein	N160	Hex(3)HexNAc(4)Fuc(1)	C-terminus
Q9HDC9	Adipocyte plasma membrane-associated protein	N160	Hex(4)HexNAc(3)Fuc(2)	C-terminus
Q9HDC9	Adipocyte plasma membrane-associated protein	N160	Hex(6)HexNAc(2)	C-terminus
Q9HDC9	Adipocyte plasma membrane-associated protein	N160	Hex(7)HexNAc(2)	C-terminus
Q9HDC9	Adipocyte plasma membrane-associated protein	N160	Hex(8)HexNAc(2)	C-terminus
Q9P0T7	Transmembrane protein 9	N38	Hex(6)HexNAc(2)	N-terminus
Q9UHG3	Prenylcysteine oxidase 1	N353	Hex(8)HexNAc(2)	Extracellular
Q9UHN6	Transmembrane protein 2	N914	Hex(9)HexNAc(2)	C-terminus
Q9UHX3	Adhesion G protein-coupled receptor E2	N111	Hex(5)HexNAc(4)Fuc(1)NeuAc(2)	Loop
Q9UMF0	Intercellular adhesion molecule 5	N214	Hex(9)HexNAc(2)	N-terminus
Q9Y337	Kallikrein-5	N173	Hex(9)HexNAc(2)	Extracellular
Q9Y337	Kallikrein-5	N173	Hex(10)HexNAc(2)	Extracellular
Q9Y5Y6	Suppressor of tumorigenicity 14 protein	N772	Hex(6)HexNAc(2)	C-terminus
Q9Y5Y6	Suppressor of tumorigenicity 14 protein	N772	Hex(7)HexNAc(2)	C-terminus
Q9Y5Y6	Suppressor of tumorigenicity 14 protein	N772	Hex(9)HexNAc(2)	C-terminus
Q9Y624	Junctional adhesion molecule A	N185	Hex(5)HexNAc(3)Fuc(1)NeuAc(1)	N-terminus
Q9Y624	Junctional adhesion molecule A	N185	Hex(5)HexNAc(4)Fuc(1)NeuAc(2)	N-terminus
Q9Y624	Junctional adhesion molecule A	N185	Hex(5)HexNAc(4)Fuc(2)NeuAc(1)	N-terminus
Q9Y624	Junctional adhesion molecule A	N185	Hex(5)HexNAc(4)Fuc(3)	N-terminus
Q9Y624	Junctional adhesion molecule A	N185	Hex(5)HexNAc(4)NeuAc(2)	N-terminus
Q9Y624	Junctional adhesion molecule A	N185	Hex(5)HexNAc(5)Fuc(4)	N-terminus
Q9Y624	Junctional adhesion molecule A	N185	Hex(6)HexNAc(3)Fuc(2)	N-terminus
Q9Y624	Junctional adhesion molecule A	N185	Hex(6)HexNAc(3)NeuAc(1)	N-terminus
Q9Y624	Junctional adhesion molecule A	N185	Hex(6)HexNAc(5)	N-terminus
Q9Y624	Junctional adhesion molecule A	N185	Hex(7)HexNAc(2)	N-terminus
Q9Y639	Neuroplastin	N171	Hex(8)HexNAc(2)	N-terminus
Q9Y639	Neuroplastin	N229	Hex(8)HexNAc(2)	N-terminus
Q9Y639	Neuroplastin	N229	Hex(9)HexNAc(2)	N-terminus
