# Supplementary material for: Membrane glycomics reveal heterogeneity and quantitative distribution of cell surface sialylation
Source: Royal Society of Chemistry journal article supplement (doi:10.1039/c8sc01875h), 2018-01-01
Supplement: c8sc01875h5.xlsx [file c8sc01875h5.xlsx]

## Sheet: SiaNAz-O-glycans
Table S1. Summary of O-glycans identified on the cell surface of Caco-2 and PNT2. Incorporated unnatural sialic acids are indicated as azido sialic acid (SiaNAz) or the reduced amino sialic acid (SiaNAm). Abbreviations: Hex, hexose; HexNAc, N-acetylhexosamine; Fuc, fucose; Sia, N-acetylneuraminic acid; ND, Not Detected.
Mass	Glycan Composition						Caco-2		PNT2
	Hex	HexNAc	Fuc	Sia	SiaNAz	SiaNAm	Absolute Abundance	% Incorporation	Absolute Abundance	% Incorporation
674.238	1	1	0	1			623213	0.168158	2.10023e+06	0.458103
512.185	0	1	0	1			ND		20067	0.733288
965.334	1	1	0	2			1853252	0.367238	908227	0.390631
1256.43	1	1	0	3			50160	0.0325342	ND
820.296	1	1	1	1			1.06461e+06	0.258902	728264	0.867814
877.318	1	2	0	1			363284	0.385967	1.74998e+06	0.401309
1039.37	2	2	0	1			1.39803e+07	0.195769	8042664	0.532332
1201.42	3	2	0	1			232110	0.132737	24803.5	0.67058
1168.41	1	2	0	2			230098	0.327115	139332	0.102834
1330.47	2	2	0	2			4.75909e+06	0.185396	13276555	0.685369
1023.38	1	2	1	1			160069	0.220643	52495.5	0.665193
1185.43	2	2	1	1			1.93313e+07	0.192882	660566	0.696775
1314.47	1	2	1	2			32322	0.850939	ND
1476.52	2	2	1	2			48545	0.808926	45419.5	0.952895
1331.49	2	2	2	1			1.15353e+06	0.404083	274372	0.57935
1080.4	1	3	0	1			60242	0.682838	24479.5	0.806826
1242.45	2	3	0	1			252703	0.245262	21290	0.695016
1404.5	3	3	0	1			1.03767e+06	0.115267	1.19788e+06	0.509054
1533.55	2	3	0	2			272310	0.184061	ND
1695.6	3	3	0	2			813924	0.286304	837236	0.747902
1226.46	1	3	1	1			87887	0.35566	10720.5	0
1388.51	2	3	1	1			1.67894e+06	0.131785	ND
1550.56	3	3	1	1			1.91324e+06	0.186112	85038.5	0.839331
1679.6	2	3	1	2			410778	0.797399	7613	0.993395
1841.66	3	3	1	2			568592	0.718808	ND
1534.57	2	3	2	1			135470	0.528887	14444.5	0.861338
1696.62	3	3	2	1			98671	0.815813	59508	0.717142
1825.66	2	3	2	2			828426	0.128077	14906	0.79317
1987.71	3	3	2	2			610595	0.105712	20080	0.686862
2061.75	4	4	2	1			96299	0.845216	ND
2207.81	4	4	3	1			291034	0.410046	8698	0.928353
1956.72	3	5	1	1			50952.5	0.83205	409774	0.0383059
715.24	1	1	0	0	1	0	125983		1.77547e+06
553.187	0	1	0	0	1	0	ND		55171.5
1047.34	1	1	0	0	2	0	46088		ND
1006.34	1	1	0	1	1	0	1.02949e+06		582211
835.307	1	1	1	0	0	1	371922		4.78113e+06
1080.37	2	2	0	0	1	0	3.40314e+06		9.15473e+06
918.319	1	2	0	0	1	0	228352		1.17303e+06
1242.42	3	2	0	0	1	0	35525		50491
1412.47	2	2	0	0	2	0	273003		14352971
1250.42	1	2	0	0	2	0	21370		ND
1209.41	1	2	0	1	1	0	90489.3		15970.5
1371.47	2	2	0	1	1	0	810120		14567742
1038.39	1	2	1	0	0	1	45317		104298
1200.44	2	2	1	0	0	1	4.61974e+06		ND
1344.49	1	2	1	0	0	2	ND		460705
1226.43	2	2	1	0	1	0	ND		1.5179e+06
1558.53	2	2	1	0	2	0	129836		743033
1396.47	1	2	1	0	2	0	42337.5		ND
1491.54	2	2	1	1	0	1	75683.3		ND
1517.53	2	2	1	1	1	0	ND		175759
1355.47	1	2	1	1	1	0	142178		31544.5
1346.5	2	2	2	0	0	1	782193		377884
1445.5	3	3	0	0	1	0	135192		1.24206e+06
1283.45	2	3	0	0	1	0	82119		48517
1121.4	1	3	0	0	1	0	129699		102243
1777.6	3	3	0	0	2	0	101714		1320595
1615.55	2	3	0	0	2	0	21687		ND
1736.6	3	3	0	1	1	0	224798		1.16324e+06
1574.55	2	3	0	1	1	0	39741		13329
1241.47	1	3	1	0	0	1	48511.5		ND
1403.52	2	3	1	0	0	1	254843		ND
1565.57	3	3	1	0	0	1	437501		444240
1871.68	3	3	1	0	0	2	56041		45118.5
1429.51	2	3	1	0	1	0	ND		34474.5
1856.67	3	3	1	1	0	1	ND		508384
1694.61	2	3	1	1	0	1	ND		1.14506e+06
1720.6	2	3	1	1	1	0	1.61675e+06		ND
1882.66	3	3	1	1	1	0	1397444		ND
1558.55	1	3	1	1	1	0	ND		184674
1549.58	2	3	2	0	0	1	152083		ND
1711.63	3	3	2	0	0	1	437040		150873
1855.68	2	3	2	0	0	2	ND		57163
2017.74	3	3	2	0	0	2	ND		16514.5
1575.57	2	3	2	0	1	0	ND		89726
1840.67	2	3	2	1	0	1	121688		ND
2002.72	3	3	2	1	0	1	72177.5		27530.5
2076.76	4	4	2	0	0	1	525853		47109.5
2222.82	4	4	3	0	0	1	202282		112704
1971.73	3	5	1	0	0	1	252426		ND
1997.72	3	5	1	0	1	0	ND		16322
