# Supplementary material for: Membrane glycomics reveal heterogeneity and quantitative distribution of cell surface sialylation
Source: Royal Society of Chemistry journal article supplement (doi:10.1039/c8sc01875h), 2018-01-01
Supplement: c8sc01875h6.xlsx [file c8sc01875h6.xlsx]

## Sheet: Details
Table S5. Details of unique cell surface glycoforms identified on PNT2 membrane proteins. Sites of glycosylation are boldfaced. Identifications with Byonic scores < 200 are italicized. Other modifications include carbamidomethylation (C*) and ammonia loss (C#).
UniProt Accession	Protein Name	Starting Position	Peptide	Glycan Composition	Theoretical [M+H]+	Observed [M+H]+	Observed Charge	Mass error (ppm)	|Log Prob|	Byonic Score	Delta Mod
O14672	Disintegrin and metalloproteinase domain-containing protein 10	277	INTTADEKDPTNPFR	Hex(8)HexNAc(2)	3421.42	3421.43	3	4.7	6.79	306.08	161.8
O14672	Disintegrin and metalloproteinase domain-containing protein 10	277	INTTADEKDPTNPFR	Hex(9)HexNAc(2)	3583.47	3583.48	3	4.4	6.87	334.23	272.18
O14672	Disintegrin and metalloproteinase domain-containing protein 10	277	INTTADEKDPTNPFRFPNIGVEK	Hex(9)HexNAc(2)	3583.47	3583.48	3	4.4	6.87	334.23	272.18
O14672	Disintegrin and metalloproteinase domain-containing protein 10	439	NISQVLEK	Hex(6)HexNAc(2)	2309	1155.01	2	3	6.04	529.12	232.5
O14672	Disintegrin and metalloproteinase domain-containing protein 10	439	NISQVLEK	Hex(7)HexNAc(2)	2471.05	2471.06	2	1.3	6.24	453.31	170.19
O14672	Disintegrin and metalloproteinase domain-containing protein 10	439	NISQVLEK	Hex(8)HexNAc(2)	2633.11	2633.11	2	2.5	6.27	514.71	229.89
O14672	Disintegrin and metalloproteinase domain-containing protein 10	439	NISQVLEK	Hex(9)HexNAc(2)	2795.16	2795.17	2	2.1	6.2	430.81	178.63
O14672	Disintegrin and metalloproteinase domain-containing protein 10	533	EGIC*NGFTALC*PASDPKPNFTDC*NR	Hex(5)HexNAc(4)Fuc(1)NeuAc(1)	4900.97	4901	4	4.4	7.55	361.42	27.09
O14672	Disintegrin and metalloproteinase domain-containing protein 10	533	EGIC*NGFTALC*PASDPKPNFTDC*NR	Hex(5)HexNAc(4)Fuc(2)NeuAc(1)	5047.03	5047.07	4	7.1	8.2	363.89	56.22
O14672	Disintegrin and metalloproteinase domain-containing protein 10	533	EGIC*NGFTALC*PASDPKPNFTDC*NR	Hex(8)HexNAc(2)	4543.82	4543.85	3	7.3	6.46	104.46	104.46
O14672	Disintegrin and metalloproteinase domain-containing protein 10	533	EGIC*NGFTALC*PASDPKPNFTDC*NR	Hex(9)HexNAc(2)	4705.87	4706.89	3	2.5	4.11	40.83	11.61
O14786	Neuropilin-1	143	RGPEC*SQNYTTPSGVIK	Hex(5)HexNAc(4)Fuc(1)NeuAc(1)	3953.65	3953.65	3	3.2	3.5	223.7	113.32
O15031	Plexin-B2	517	SC*VAVTSAQPQNMSR	Hex(5)HexNAc(4)NeuAc(2)	3840.53	3840.54	3	2.6	6.65	319.26	193.72
O15031	Plexin-B2	728	LSHDANETLPLHLYVK	Hex(5)HexNAc(4)Fuc(1)NeuAc(2)	4200.81	4200.83	4	3.7	8.65	516.05	108.52
O15031	Plexin-B2	728	LSHDANETLPLHLYVK	Hex(5)HexNAc(4)Fuc(2)	3764.68	3764.7	4	5.4	8.46	513.37	412.86
O15031	Plexin-B2	728	LSHDANETLPLHLYVK	Hex(5)HexNAc(4)Fuc(2)NeuAc(1)	4055.77	4055.79	4	4.6	10.55	603.68	68.72
O15031	Plexin-B2	728	LSHDANETLPLHLYVK	Hex(5)HexNAc(5)Fuc(1)NeuAc(1)	4112.79	4112.8	4	2.2	7	331.7	151.1
O15031	Plexin-B2	753	LHVTLYNC*SFGR	Hex(6)HexNAc(2)	2845.2	949.071	3	0.5	10.98	627.61	528.36
O15031	Plexin-B2	753	LHVTLYNC*SFGR	Hex(7)HexNAc(2)	3007.25	1003.09	3	-0.1	8.8	557.76	493.97
O15031	Plexin-B2	753	LHVTLYNC*SFGR	Hex(8)HexNAc(2)	3169.3	1057.11	3	-0.1	6.39	330.04	200.07
O15031	Plexin-B2	753	LHVTLYNC*SFGR	Hex(9)HexNAc(2)	3331.36	1111.12	3	1.1	5.91	257.39	257.39
O15031	Plexin-B2	788	C*VYEALC*NTTSEC*PPPVITR	Hex(7)HexNAc(2)Fuc(1)	4053.66	4052.66	3	-0.5	3.29	172.04	61.52
O15031	Plexin-B2	788	C*#VYEALC*NTTSEC*PPPVITR	Hex(8)HexNAc(2)	4052.63	4052.66	3	6.5	4.64	234.94	95.05
O15031	Plexin-B2	1000	SINVTGQGFSLIQR	Hex(8)HexNAc(2)	3222.4	1074.81	3	-1	13.62	780.39	512.31
O15031	Plexin-B2	1000	SINVTGQGFSLIQR	Hex(9)HexNAc(2)	3384.46	1128.82	3	-1.9	9.24	604.59	343.64
O15031	Plexin-B2	1031	EAESLQPMTVVGTDYVFHNDTK	Hex(7)HexNAc(2)	4021.69	4022.72	3	7.6	4.25	84.35	77.07
O15031	Plexin-B2	1053	VVFLSPAVPEEPEAYNLTVLIEMDGHR	Hex(5)HexNAc(5)Fuc(2)	5143.31	5142.32	4	1.9	5.05	228.83	60.09
O15031	Plexin-B2	1084	TEAGAFEYVPDPTFENFTGGVK	Hex(5)HexNAc(3)Fuc(1)NeuAc(1)	4232.76	4232.78	3	6.2	7.53	353.34	215.88
O15031	Plexin-B2	1084	TEAGAFEYVPDPTFENFTGGVK	Hex(5)HexNAc(4)Fuc(1)NeuAc(1)	4435.84	4435.86	3	5	7.75	404.41	13.89
O15031	Plexin-B2	1084	TEAGAFEYVPDPTFENFTGGVK	Hex(5)HexNAc(4)Fuc(2)NeuAc(1)	4581.9	4580.91	4	3.2	6.41	407.36	16.5
O15031	Plexin-B2	1084	TEAGAFEYVPDPTFENFTGGVK	Hex(8)HexNAc(2)	4078.68	4078.69	3	0.3	7.12	336.49	285.34
O15031	Plexin-B2	1084	TEAGAFEYVPDPTFENFTGGVK	Hex(9)HexNAc(2)	4240.74	4240.76	3	5.8	8.68	432.3	398.15
O15230	Laminin subunit alpha-5	1324	VWQGHANASFC*PHGYGC*R	Hex(9)HexNAc(2)	3968.54	3968.55	4	3.8	12.31	684.24	557.93
O15230	Laminin subunit alpha-5	2208	LNASIADLQSQLR	Hex(9)HexNAc(2)	3293.41	1098.47	3	-1.9	4.02	259.55	128.35
O15230	Laminin subunit alpha-5	2422	DNATLQATLHAAR	Hex(9)HexNAc(2)	3246.35	3246.37	3	4.5	4.2	186.79	105.28
O15230	Laminin subunit alpha-5	3276	VFDLQQNLGSVNVSTGC*APALQAQTPGLGPR	Hex(3)HexNAc(6)	4900.26	4899.25	4	-0.4	4.79	201.12	25.43
O15230	Laminin subunit alpha-5	3276	VFDLQQNLGSVNVSTGC*APALQAQTPGLGPR	Hex(8)HexNAc(2)	4898.2	4899.22	4	3.5	8.72	392.61	14.4
O43291	Kunitz-type protease inhibitor 2	87	KC*ATVTENATGDLATSR	Hex(8)HexNAc(2)	3497.45	3497.47	3	6	5.65	193.92	166.07
O60487	Myelin protein zero-like protein 2	113	LQFDDNGTYTC*QVK	Hex(7)HexNAc(2)	3229.29	1077.1	3	3.2	5.52	275.3	214.61
O60635	Tetraspanin-1	129	DYGSQEDFTQVWNTTMK	Hex(7)HexNAc(2)	3590.41	3590.44	3	7.7	4.09	153.07	72.64
O60635	Tetraspanin-1	149	C*C*GFTNYTDFEDSPYFK	Hex(6)HexNAc(3)NeuAc(1)	4023.5	4024.51	3	2.4	2.75	146.54	28.91
O60635	Tetraspanin-1	149	C*#C*GFTNYTDFEDSPYFK	Hex(7)HexNAc(2)	3674.35	3674.37	3	4.8	11.05	616.88	527.81
O60635	Tetraspanin-1	149	C*#C*GFTNYTDFEDSPYFK	Hex(8)HexNAc(2)	3836.4	3836.42	3	5.7	13.05	738.29	626.45
O60635	Tetraspanin-1	149	C*#C*GFTNYTDFEDSPYFK	Hex(9)HexNAc(2)	3998.45	3998.48	3	5.3	7.05	506.1	364.18
O60635	Tetraspanin-1	164	ETKNQSVPLSC*C*R	Hex(5)HexNAc(3)Fuc(1)	3144.3	3144.3	3	2.2	4.63	241.31	106.62
O60635	Tetraspanin-1	167	NQSVPLSC*C*R	Hex(5)HexNAc(4)Fuc(1)	2989.19	2989.22	3	9.2	2.53	199.09	142.25
O75054	Immunoglobulin superfamily member 3	98	VQGNSTLLHITDLQAR	Hex(7)HexNAc(2)	3306.48	1102.83	3	0.4	3.05	260.07	129.87
O75054	Immunoglobulin superfamily member 3	934	RAEDTAGQTALTVMRPDASLQVDTVVPNATVSEK	Hex(5)HexNAc(5)NeuAc(1)	5687.56	5686.61	5	8.4	4.4	71.81	71.81
O75326	Semaphorin-7A	246	EDNPDKNPEAPLNVSR	Hex(8)HexNAc(2)	3497.44	3497.45	3	2.8	5.29	205.29	123.95
O75718	Cartilage-associated protein	87	NC*SAAPQPEPAAGLASYPELR	Hex(8)HexNAc(2)	3901.63	3901.63	3	0.6	6.75	298.63	229.74
O75718	Cartilage-associated protein	343	DTWGLSDEHFQPRPEAVQFFNVTTLQK	Hex(7)HexNAc(2)	4731.09	4730.12	4	7.6	7.25	325.11	318.65
O75718	Cartilage-associated protein	343	DTWGLSDEHFQPRPEAVQFFNVTTLQK	Hex(8)HexNAc(2)	4893.14	4893.19	4	10.4	8.71	402.8	384.6
O75882	Attractin	262	ISNSSDTVEC*EC*SENWKGEAC*DIPHC*TDNC*GFPHR	Hex(9)HexNAc(2)	6033.29	6033.31	5	3	6.52	193.49	193.49
O75882	Attractin	731	NHSC*SEGQISIFR	Hex(9)HexNAc(2)	3399.34	3399.36	3	5.2	6.54	254.51	152.45
O75976	Carboxypeptidase D	170	LLNTTDVYLLPSLNPDGFER	Hex(5)HexNAc(4)Fuc(1)NeuAc(2)	4628.01	4628.02	4	3.9	4.79	168	9.95
O75976	Carboxypeptidase D	515	RFANEYPNITR	Hex(4)HexNAc(6)	3247.39	3247.37	3	-7.4	4.04	150.77	150.77
O75976	Carboxypeptidase D	515	RFANEYPNITR	Hex(5)HexNAc(4)Fuc(1)NeuAc(2)	3731.53	3731.56	3	7.8	3.3	146.37	63.14
O75976	Carboxypeptidase D	515	RFANEYPNITR	Hex(5)HexNAc(4)Fuc(3)NeuAc(1)	3732.55	3732.56	3	0.9	3.8	161.89	103.14
O75976	Carboxypeptidase D	626	NNSNNFDLNR	Hex(5)HexNAc(2)	2423.97	2423.97	2	2.6	3.88	90.37	45.21
O75976	Carboxypeptidase D	945	GLVMNYPHITNLTNLGQSTEYR	Hex(3)HexNAc(3)Fuc(2)	3908.76	3908.77	3	1.7	2.28	67.37	43.18
O75976	Carboxypeptidase D	967	HIWSLEISNKPNVSEPEEPK	Hex(5)HexNAc(4)Fuc(2)NeuAc(1)	4538.97	4538.99	4	5	11.31	638.47	48.29
O75976	Carboxypeptidase D	967	HIWSLEISNKPNVSEPEEPK	Hex(5)HexNAc(4)Fuc(3)	4393.93	4393.95	4	3	7.1	354.01	82.49
O75976	Carboxypeptidase D	1060	GKDLDTDFTNNASQPETK	Hex(5)HexNAc(4)Fuc(1)NeuAc(1)	4040.65	4041.69	3	9.2	6.69	259.94	36.73
O75976	Carboxypeptidase D	1060	GKDLDTDFTNNASQPETK	Hex(5)HexNAc(4)Fuc(2)NeuAc(1)	4186.71	4187.72	3	3.2	6.39	192.69	124.54
O75976	Carboxypeptidase D	1060	GKDLDTDFTNNASQPETK	Hex(5)HexNAc(4)Fuc(3)	4041.67	4041.69	3	5	5.57	238.2	25.34
O75976	Carboxypeptidase D	1060	GKDLDTDFTNNASQPETK	Hex(6)HexNAc(2)	3359.39	3359.42	3	7.5	5.64	220.87	184.33
O75976	Carboxypeptidase D	1060	GKDLDTDFTNNASQPETK	Hex(7)HexNAc(2)	3521.44	3521.45	3	3	6.41	239.3	189.03
O96005	Cleft lip and palate transmembrane protein 1	290	DYYPINESLASLPLR	Hex(6)HexNAc(2)	3129.38	1043.8	3	0.5	8.56	542.54	508.38
O96005	Cleft lip and palate transmembrane protein 1	290	DYYPINESLASLPLR	Hex(8)HexNAc(2)	3453.48	1151.83	3	0.5	11.85	665.7	605.17
P00533	Epidermal growth factor receptor	347	DSLSINATNIK	Hex(6)HexNAc(2)	2554.1	1277.56	2	1.6	6.82	515.75	313.73
P00533	Epidermal growth factor receptor	347	DSLSINATNIK	Hex(7)HexNAc(2)	2716.16	2716.16	2	1.5	6.79	433.46	228.7
P00533	Epidermal growth factor receptor	347	DSLSINATNIK	Hex(8)HexNAc(2)	2878.21	2878.21	2	0.4	6.68	358.63	172.68
P00533	Epidermal growth factor receptor	358	HFKNC*TSISGDLHILPVAFR	Hex(7)HexNAc(2)	3852.73	3852.74	4	4.8	8.6	527.01	447.8
P00533	Epidermal growth factor receptor	358	HFKNC*TSISGDLHILPVAFR	Hex(7)HexNAc(7)NeuAc(3)	5741.41	5740.37	5	-5.4	3.84	70.82	45.38
P00533	Epidermal growth factor receptor	358	HFKNC*TSISGDLHILPVAFR	Hex(8)HexNAc(2)	4014.78	4014.8	4	4.3	13.29	747.6	643.05
P00533	Epidermal growth factor receptor	361	NC*TSISGDLHILPVAFR	Hex(8)HexNAc(2)	3602.56	1201.52	3	0.6	7.14	425.67	258.03
P00533	Epidermal growth factor receptor	400	EITGFLLIQAWPENR	Hex(5)HexNAc(4)Fuc(1)NeuAc(2)	4137.78	4137.79	3	1.7	2.25	109.92	24.42
P00533	Epidermal growth factor receptor	548	EFVENSEC*IQC*HPEC*LPQAMNITC*TGR	Hex(5)HexNAc(5)NeuAc(2)	5688.25	5687.27	4	5	4.89	106.99	63.66
P00533	Epidermal growth factor receptor	610	YADAGHVC*HLC*HPNC*TYGC*TGPGLEGC*PTNGPK	Hex(6)HexNAc(2)	5035.99	5036.01	5	2.5	15.29	753.21	744.79
P00533	Epidermal growth factor receptor	610	YADAGHVC*HLC*HPNC*TYGC*TGPGLEGC*PTNGPK	Hex(7)HexNAc(2)	5198.05	5198.09	5	7.9	14.19	730.17	720.44
P00533	Epidermal growth factor receptor	610	YADAGHVC*HLC*HPNC*TYGC*TGPGLEGC*PTNGPK	Hex(8)HexNAc(2)	5360.1	5360.13	5	5.8	20.19	1013.99	1002.34
P01889	HLA class I histocompatibility antigen, B-7 alpha chain	107	GYYNQSEAGSHTLQSMYGC*DVGPDGR	Hex(3)HexNAc(7)Fuc(2)	5049.02	5050.04	4	3.9	2.92	115.86	26.73
P01889	HLA class I histocompatibility antigen, B-7 alpha chain	107	GYYNQSEAGSHTLQSMYGC*DVGPDGR	Hex(4)HexNAc(5)Fuc(2)NeuAc(1)	5096.01	5096.05	4	7.6	7.01	245.91	103.92
P01889	HLA class I histocompatibility antigen, B-7 alpha chain	107	GYYNQSEAGSHTLQSMYGC*DVGPDGR	Hex(5)HexNAc(6)NeuAc(2)	5460.12	5460.14	4	3.2	2.92	132.02	10.29
P02786	Transferrin receptor protein 1	241	KDFEDLYTPVNGSIVIVR	Hex(5)HexNAc(4)Fuc(1)NeuAc(2)	4415.93	4415.95	4	6.4	4.57	218.04	13.76
P02786	Transferrin receptor protein 1	241	KDFEDLYTPVNGSIVIVR	Hex(5)HexNAc(4)Fuc(2)NeuAc(1)	4270.89	4270.92	4	8.2	6.42	332.01	49.16
P02786	Transferrin receptor protein 1	241	KDFEDLYTPVNGSIVIVR	Hex(5)HexNAc(4)NeuAc(2)	4269.87	4268.84	3	-5	5.09	167.01	61.28
P02786	Transferrin receptor protein 1	241	KDFEDLYTPVNGSIVIVR	Hex(5)HexNAc(4)Fuc(3)NeuAc(1)	4288.85	4287.84	4	-1.1	4.07	302.63	45.19
P02786	Transferrin receptor protein 1	241	KDFEDLYTPVNGSIVIVR	Hex(6)HexNAc(4)Fuc(1)NeuAc(1)	4286.88	4286.91	4	5.8	4.32	223.41	41.44
P02786	Transferrin receptor protein 1	241	KDFEDLYTPVNGSIVIVR	Hex(6)HexNAc(5)Fuc(1)NeuAc(2)	4781.06	4781.06	4	1.1	6.13	409.51	37.89
P02786	Transferrin receptor protein 1	241	KDFEDLYTPVNGSIVIVR	Hex(6)HexNAc(5)NeuAc(3)	4926.1	4926.07	3	-5	4.99	176.26	12.8
P02786	Transferrin receptor protein 1	242	DFEDLYTPVNGSIVIVR	Hex(5)HexNAc(4)Fuc(1)NeuAc(2)	4287.83	4287.84	4	2.9	3.9	207.4	41.46
P02786	Transferrin receptor protein 1	720	KQNNGAFNETLFR	Hex(8)HexNAc(2)	3241.35	3241.37	3	4.3	6.31	358.27	277.33
P02786	Transferrin receptor protein 1	720	KQNNGAFNETLFR	Hex(9)HexNAc(2)	3403.41	3403.42	3	4.4	7.16	360.58	284.71
P02786	Transferrin receptor protein 1	721	QNNGAFNETLFR	Hex(8)HexNAc(2)	3113.26	3113.26	2	0.7	5.58	302.56	44.25
P02786	Transferrin receptor protein 1	721	QNNGAFNETLFR	Hex(9)HexNAc(2)	3275.31	1092.44	3	2	5.23	331.53	88.93
P03989	HLA class I histocompatibility antigen, B-27 alpha chain	108	YYNQSEAGSHTLQNMYGC*DVGPDGR	Hex(4)HexNAc(5)Fuc(1)NeuAc(1)	4919.94	4919.91	4	-6.6	2.19	91.09	10.94
P03989	HLA class I histocompatibility antigen, B-27 alpha chain	108	YYNQSEAGSHTLQNMYGC*DVGPDGR	Hex(4)HexNAc(6)NeuAc(1)	4976.96	4976.94	5	-4.9	2.16	210.17	35.65
P03989	HLA class I histocompatibility antigen, B-27 alpha chain	108	YYNQSEAGSHTLQNMYGC*DVGPDGR	Hex(4)HexNAc(7)Fuc(1)NeuAc(1)	5326.1	5327.13	4	4.4	3.75	134.88	15.45
P03989	HLA class I histocompatibility antigen, B-27 alpha chain	108	YYNQSEAGSHTLQNMYGC*DVGPDGR	Hex(4)HexNAc(7)NeuAc(1)	5180.04	5180.07	4	6.6	4.48	104.04	56
P04222	HLA class I histocompatibility antigen, Cw-3 alpha chain	107	GYYNQSEAGSHIIQRMYGC*DVGPDGR	Hex(10)HexNAc(2)Fuc(1)	5103.04	5102.09	4	10	2.64	46.11	11.52
P04233	HLA class II histocompatibility antigen gamma chain	109	MATPLLMQALPMGALPQGPMQNATK	Hex(6)HexNAc(2)	3988.8	3988.82	3	3.8	7.1	247.69	247.69
P04233	HLA class II histocompatibility antigen gamma chain	109	MATPLLMQALPMGALPQGPMQNATK	Hex(8)HexNAc(2)	4312.91	4312.93	3	4.4	6.09	95.58	95.58
P05026	Sodium/potassium-transporting ATPase subunit beta-1	183	VLGFKPKPPKNESLETYPVMK	Hex(6)HexNAc(7)Fuc(1)NeuAc(2)	5524.44	5523.43	5	-0.5	3.07	59.27	59.27
P05026	Sodium/potassium-transporting ATPase subunit beta-1	254	YLQPLLAVQFTNLTMDTEIR	Hex(6)HexNAc(6)Fuc(3)NeuAc(3)	5868.5	5869.52	4	3.8	5.66	236.23	19.74
P05026	Sodium/potassium-transporting ATPase subunit beta-1	254	YLQPLLAVQFTNLTMDTEIR	Hex(6)HexNAc(6)Fuc(4)NeuAc(2)	5723.46	5723.5	4	6.5	4.44	120.1	22.5
P05026	Sodium/potassium-transporting ATPase subunit beta-1	254	YLQPLLAVQFTNLTMDTEIR	Hex(6)HexNAc(6)Fuc(4)NeuAc(3)	6014.55	6015.6	4	7.3	5.55	195.21	172.2
P05026	Sodium/potassium-transporting ATPase subunit beta-1	254	YLQPLLAVQFTNLTMDTEIR	Hex(6)HexNAc(6)Fuc(5)NeuAc(2)	5869.52	5870.53	4	1.6	5.08	189.54	174.69
P05026	Sodium/potassium-transporting ATPase subunit beta-1	254	YLQPLLAVQFTNLTMDTEIR	Hex(6)HexNAc(7)Fuc(1)NeuAc(2)	5488.36	5487.37	4	2.6	5.76	239.95	186.91
P05026	Sodium/potassium-transporting ATPase subunit beta-1	254	YLQPLLAVQFTNLTMDTEIR	Hex(6)HexNAc(7)Fuc(2)NeuAc(2)	5634.42	5633.43	4	2.3	4.62	117.67	10.52
P05026	Sodium/potassium-transporting ATPase subunit beta-1	254	YLQPLLAVQFTNLTMDTEIR	Hex(7)HexNAc(7)Fuc(1)NeuAc(2)	5650.42	5649.45	4	6.8	5.25	208.11	87.43
P05026	Sodium/potassium-transporting ATPase subunit beta-1	254	YLQPLLAVQFTNLTMDTEIR	Hex(7)HexNAc(7)NeuAc(1)	5213.26	5212.28	4	3.8	4.66	186.65	14.24
P05026	Sodium/potassium-transporting ATPase subunit beta-1	254	YLQPLLAVQFTNLTMDTEIR	Hex(7)HexNAc(7)NeuAc(2)	5504.36	5504.39	4	6	7.36	431.36	31.66
P05187	Alkaline phosphatase, placental type	140	FNQC*NTTR	Hex(4)HexNAc(5)Fuc(2)NeuAc(1)	3287.28	3287.31	3	10	2.37	167.34	46.76
P05187	Alkaline phosphatase, placental type	140	FNQC*NTTR	Hex(5)HexNAc(4)Fuc(1)NeuAc(1)	3100.19	3100.2	3	3.9	5.94	287.63	96.21
P05187	Alkaline phosphatase, placental type	140	FNQC*NTTR	Hex(5)HexNAc(4)Fuc(1)NeuAc(2)	3391.29	3391.31	3	7	2.17	201.24	29.88
P05187	Alkaline phosphatase, placental type	140	FNQC*NTTR	Hex(5)HexNAc(4)Fuc(2)NeuAc(1)	3246.25	3246.27	3	5.8	4.6	247.39	65.04
P05187	Alkaline phosphatase, placental type	140	FNQC*NTTR	Hex(5)HexNAc(4)Fuc(3)NeuAc(1)	3392.31	3392.31	3	0.7	3.77	202.76	50.42
P05187	Alkaline phosphatase, placental type	140	FNQC*NTTR	Hex(5)HexNAc(5)Fuc(1)NeuAc(2)	3594.37	3594.39	3	6.8	4.07	209.22	60.1
P05187	Alkaline phosphatase, placental type	140	FNQC*NTTR	Hex(5)HexNAc(5)Fuc(2)	3158.23	3158.25	3	3.7	3.74	203.16	70.57
P05187	Alkaline phosphatase, placental type	140	FNQC*NTTR	Hex(5)HexNAc(5)Fuc(3)	3304.29	3304.3	3	0.9	2.18	168.26	57.56
P05187	Alkaline phosphatase, placental type	140	FNQC*NTTR	Hex(5)HexNAc(5)Fuc(3)NeuAc(1)	3595.39	3595.39	3	0.3	3.77	151.46	58.13
P05187	Alkaline phosphatase, placental type	140	FNQC*NTTR	Hex(6)HexNAc(5)Fuc(1)NeuAc(1)	3465.32	3465.33	3	1.7	2.25	164.74	14.49
P05187	Alkaline phosphatase, placental type	140	FNQC*NTTR	Hex(6)HexNAc(5)Fuc(1)NeuAc(2)	3756.42	3756.44	3	5.1	2.25	182.82	31.81
P05187	Alkaline phosphatase, placental type	140	FNQC*NTTR	Hex(6)HexNAc(5)Fuc(4)NeuAc(1)	3903.5	3903.51	3	4.2	2.25	160.08	20.59
P05556	Integrin beta-1	34	SC*GEC*IQAGPNC*GWC*TNSTFLQEGMPTSAR	Hex(8)HexNAc(2)	5078.97	5078.98	3	0.7	8.13	304.47	304.47
P05556	Integrin beta-1	34	SC*GEC*IQAGPNC*GWC*TNSTFLQEGMPTSAR	Hex(9)HexNAc(2)	5241.02	5241.04	4	3.1	9.61	548.45	494.08
P05556	Integrin beta-1	203	LRNPC*TSEQNC*TSPFSYK	Hex(5)HexNAc(4)Fuc(1)NeuAc(1)	4248.71	4247.72	4	3.9	6.89	430.13	175
P05556	Integrin beta-1	203	LRNPC*TSEQNC*TSPFSYK	Hex(5)HexNAc(4)Fuc(1)NeuAc(2)	4539.81	4539.81	3	1.6	6.9	316.96	59.32
P05556	Integrin beta-1	203	LRNPC*TSEQNC*TSPFSYK	Hex(5)HexNAc(4)Fuc(3)	4249.73	4250.74	3	2	3.76	87.41	31.35
P05556	Integrin beta-1	203	LRNPC*TSEQNC*TSPFSYK	Hex(6)HexNAc(2)	3567.45	1189.82	3	2	8.5	512.21	447.06
P05556	Integrin beta-1	203	LRNPC*TSEQNC*TSPFSYK	Hex(6)HexNAc(6)Fuc(2)NeuAc(3)	5545.17	5544.19	4	3.7	6.21	223.34	212.32
P05556	Integrin beta-1	203	LRNPC*TSEQNC*TSPFSYK	Hex(6)HexNAc(6)Fuc(4)NeuAc(3)	5837.29	5837.3	4	2.5	5.25	175.54	159.91
P05556	Integrin beta-1	203	LRNPC*TSEQNC*TSPFSYK	Hex(6)HexNAc(6)NeuAc(3)	5253.05	5252.08	4	6	5.44	231.85	212.43
P05556	Integrin beta-1	203	LRNPC*TSEQNC*TSPFSYK	Hex(7)HexNAc(2)	3729.5	1243.84	3	1.2	10.01	581.47	509.76
P05556	Integrin beta-1	203	LRNPC*TSEQNC*TSPFSYK	Hex(7)HexNAc(6)Fuc(1)NeuAc(3)	5561.17	5561.17	4	1.1	5.78	254.2	15.24
P05556	Integrin beta-1	203	LRNPC*TSEQNC*TSPFSYK	Hex(7)HexNAc(6)Fuc(2)NeuAc(1)	5125.03	5126.05	4	2.6	4.46	177.52	55.78
P05556	Integrin beta-1	203	LRNPC*TSEQNC*TSPFSYK	Hex(8)HexNAc(2)	3891.56	3891.57	3	2.6	7.87	253.03	222.91
P05556	Integrin beta-1	203	LRNPC*TSEQNC*TSPFSYK	Hex(9)HexNAc(2)	4053.61	4053.62	3	3.5	7.88	257.95	257.95
P05556	Integrin beta-1	203	LRNPC*TSEQNC*TSPFSYK	Hex(10)HexNAc(2)	4215.66	4215.67	3	1.5	7.1	311.76	194.98
P05556	Integrin beta-1	205	NPC*TSEQNC*TSPFSYK	Hex(5)HexNAc(4)Fuc(1)	3688.43	3688.44	3	4.2	3.99	110.88	27.94
P05556	Integrin beta-1	205	NPC*TSEQNC*TSPFSYK	Hex(5)HexNAc(4)Fuc(1)NeuAc(1)	3979.52	3979.53	3	0.7	6.72	254.95	150.65
P05556	Integrin beta-1	205	NPC*TSEQNC*TSPFSYK	Hex(5)HexNAc(4)Fuc(2)NeuAc(1)	4125.58	4126.61	3	4.6	5.64	176.35	108.7
P05556	Integrin beta-1	205	NPC*TSEQNC*TSPFSYK	Hex(6)HexNAc(2)	3298.27	3298.28	3	4.4	7.66	292.75	207.3
P05556	Integrin beta-1	205	NPC*TSEQNC*TSPFSYK	Hex(7)HexNAc(2)	3460.32	3460.32	3	1.4	7.2	341.55	282.56
P05556	Integrin beta-1	205	NPC*TSEQNC*TSPFSYK	Hex(8)HexNAc(2)	3622.37	3622.38	3	2.4	12.74	744.38	678.32
P05556	Integrin beta-1	205	NPC*TSEQNC*TSPFSYK	Hex(9)HexNAc(2)	3784.42	3784.42	3	0	7.21	401.39	308.19
P05556	Integrin beta-1	205	NPC*TSEQNC*TSPFSYK	Hex(10)HexNAc(2)	3946.48	3946.5	3	6.3	6.05	407.3	288.3
P05556	Integrin beta-1	403	NGVNGTGENGR	Hex(9)HexNAc(2)	2939.13	980.377	3	-3	5.29	268.13	214.11
P05556	Integrin beta-1	477	C*HEGNGTFEC*GAC*R	Hex(5)HexNAc(2)Fuc(1)	3017.1	3017.11	3	3.5	4.72	175.01	139.62
P05556	Integrin beta-1	477	C*HEGNGTFEC*GAC*R	Hex(6)HexNAc(2)	3033.09	3033.1	3	3.7	6.87	324.17	316.82
P05556	Integrin beta-1	477	C*HEGNGTFEC*GAC*R	Hex(6)HexNAc(2)Fuc(1)	3179.15	3179.14	3	-4.3	3.86	100.04	94.59
P05556	Integrin beta-1	477	C*HEGNGTFEC*GAC*R	Hex(7)HexNAc(2)	3195.14	3195.15	3	3	7.19	378.06	324.34
P05556	Integrin beta-1	477	C*#HEGNGTFEC*GAC*R	Hex(7)HexNAc(6)Fuc(2)NeuAc(1)	4573.65	4573.64	4	-0.4	5.99	248.22	23.6
P05556	Integrin beta-1	477	C*HEGNGTFEC*GAC*R	Hex(8)HexNAc(2)	3357.2	3357.21	3	4.1	7.04	352.34	304.8
P05556	Integrin beta-1	477	C*HEGNGTFEC*GAC*R	Hex(9)HexNAc(2)	3519.25	3519.26	3	3.5	7.16	367.14	320.37
P05556	Integrin beta-1	477	C*#HEGNGTFEC*GAC*R	Hex(10)HexNAc(2)	3664.28	3664.29	3	3.5	4.9	207.79	188.07
P05556	Integrin beta-1	518	KENSSEIC*SNNGEC*VC*GQC*VC*R	Hex(6)HexNAc(2)	4025.52	4025.53	4	2.4	8.84	505.89	419.25
P05556	Integrin beta-1	518	KENSSEIC*SNNGEC*VC*GQC*VC*R	Hex(6)HexNAc(6)Fuc(4)NeuAc(3)	6295.35	6294.32	4	-4.7	4.44	90.21	90.21
P05556	Integrin beta-1	518	KENSSEIC*SNNGEC*VC*GQC*VC*R	Hex(7)HexNAc(2)	4187.57	4187.58	3	3	8.3	364.47	309.28
P05556	Integrin beta-1	518	KENSSEIC*SNNGEC*VC*GQC*VC*R	Hex(8)HexNAc(2)	4349.62	4349.64	4	3.8	13.84	779.05	685.98
P05556	Integrin beta-1	518	KENSSEIC*SNNGEC*VC*GQC*VC*R	Hex(9)HexNAc(2)	4511.68	4511.69	4	2.4	11.84	677.32	561.86
P05556	Integrin beta-1	519	ENSSEIC*SNNGEC*VC*GQC*VC*R	Hex(6)HexNAc(2)	3897.42	3897.43	3	2.9	7.66	299.12	261.05
P05556	Integrin beta-1	519	ENSSEIC*SNNGEC*VC*GQC*VC*R	Hex(6)HexNAc(3)Fuc(2)	4392.62	4393.64	3	3.6	2.89	58.9	30.14
P05556	Integrin beta-1	519	ENSSEIC*SNNGEC*VC*GQC*VC*R	Hex(6)HexNAc(3)NeuAc(1)	4391.6	4392.64	3	8.9	5.93	297.93	13.02
P05556	Integrin beta-1	519	ENSSEIC*SNNGEC*VC*GQC*VC*R	Hex(7)HexNAc(2)	4059.48	4060.49	3	3.3	6.04	202.19	175.94
P05556	Integrin beta-1	519	ENSSEIC*SNNGEC*VC*GQC*VC*R	Hex(8)HexNAc(2)	4221.53	4222.54	3	2.8	6.89	335.79	11.3
P05556	Integrin beta-1	519	ENSSEIC*SNNGEC*VC*GQC*VC*R	Hex(9)HexNAc(2)	4383.58	4383.59	3	2.6	6.9	359.46	328.1
P05556	Integrin beta-1	658	KDTC*TQEC*SYFNITK	Hex(5)HexNAc(4)Fuc(1)NeuAc(1)	3954.57	3954.58	3	2.6	6.65	259.08	151.59
P05556	Integrin beta-1	658	KDTC*TQEC*SYFNITK	Hex(5)HexNAc(4)Fuc(1)NeuAc(2)	4245.66	4245.68	3	5.4	6.54	247.22	12.69
P05556	Integrin beta-1	658	KDTC*TQEC*SYFNITK	Hex(5)HexNAc(4)Fuc(2)	3809.53	3809.54	3	3.6	4.56	159.08	79.49
P05556	Integrin beta-1	658	KDTC*TQEC*SYFNITK	Hex(5)HexNAc(4)Fuc(2)NeuAc(1)	4100.62	4100.66	4	9.2	5.86	383.8	239.22
P05556	Integrin beta-1	658	KDTC*TQEC*SYFNITK	Hex(5)HexNAc(4)Fuc(3)NeuAc(1)	4246.68	4245.7	4	6.1	5.45	289.22	22.03
P05556	Integrin beta-1	658	KDTC*TQEC*SYFNITK	Hex(6)HexNAc(2)	3273.31	3273.31	3	-0.1	6.62	262.78	122.9
P05556	Integrin beta-1	658	KDTC*TQEC*SYFNITK	Hex(6)HexNAc(5)Fuc(1)NeuAc(1)	4319.7	4318.73	3	8.8	5.15	233.83	171.59
P05556	Integrin beta-1	658	KDTC*TQEC*SYFNITK	Hex(6)HexNAc(5)Fuc(2)NeuAc(1)	4465.76	4465.79	3	7.2	4.47	200.22	22.34
P05556	Integrin beta-1	658	KDTC*TQEC*SYFNITK	Hex(6)HexNAc(5)Fuc(3)NeuAc(1)	4611.81	4611.84	4	5.2	6.42	377.18	20.92
P05556	Integrin beta-1	658	KDTC*TQEC*SYFNITK	Hex(6)HexNAc(5)Fuc(4)NeuAc(1)	4757.87	4758.89	4	3.2	5.75	362.86	144.16
P05556	Integrin beta-1	658	KDTC*TQEC*SYFNITK	Hex(7)HexNAc(2)	3435.36	3435.37	3	2.8	6.66	279.25	175.86
P05556	Integrin beta-1	658	KDTC*TQEC*SYFNITK	Hex(7)HexNAc(6)Fuc(2)NeuAc(1)	4830.89	4829.91	4	5.8	5.87	340.71	25.88
P05556	Integrin beta-1	658	KDTC*TQEC*SYFNITK	Hex(7)HexNAc(6)Fuc(3)	4685.85	4686.85	3	-1.6	4.07	95.68	46.44
P05556	Integrin beta-1	658	KDTC*TQEC*SYFNITK	Hex(7)HexNAc(6)Fuc(3)NeuAc(1)	4976.95	4976.98	4	6.2	5.92	400.29	31.1
P05556	Integrin beta-1	658	KDTC*TQEC*SYFNITK	Hex(7)HexNAc(6)Fuc(4)NeuAc(1)	5123	5123.02	4	2.7	5.91	342.77	28.31
P05556	Integrin beta-1	658	KDTC*TQEC*SYFNITK	Hex(7)HexNAc(6)NeuAc(2)	4829.87	4829.91	4	9.3	6.29	382.94	16.17
P05556	Integrin beta-1	658	KDTC*TQEC*SYFNITK	Hex(8)HexNAc(2)	3597.41	3597.43	3	6.1	6.74	275.94	209.41
P05556	Integrin beta-1	658	KDTC*TQEC*SYFNITK	Hex(10)HexNAc(2)	3921.52	3921.52	3	1.7	6.66	251.02	168.42
P05556	Integrin beta-1	659	DTC*TQEC*SYFNITK	Hex(6)HexNAc(2)	3145.21	1049.08	3	-0.2	8.36	502.85	405.83
P05556	Integrin beta-1	659	DTC*TQEC*SYFNITK	Hex(8)HexNAc(2)	3469.32	3469.33	3	3.9	10.33	584.35	440.05
P05556	Integrin beta-1	659	DTC*TQEC*SYFNITK	Hex(9)HexNAc(2)	3631.37	3631.38	3	3.7	6.53	297.23	256.23
P06756	Integrin alpha-V	73	ANTTQPGIVEGGQVLK	Hex(6)HexNAc(2)	2990.35	997.453	3	-0.1	15.96	868.58	652.79
P06756	Integrin alpha-V	73	ANTTQPGIVEGGQVLK	Hex(7)HexNAc(2)	3152.4	1051.47	3	-0.3	7.2	550.78	349.4
P06756	Integrin alpha-V	597	TAADTTGLQPILNQFTPANISR	Hex(8)HexNAc(2)	4031.8	4031.79	4	-0.4	5.31	281.37	240.84
P06756	Integrin alpha-V	597	TAADTTGLQPILNQFTPANISR	Hex(9)HexNAc(2)	4193.85	4193.87	3	6.1	7.55	311.33	205.44
P06756	Integrin alpha-V	597	TAADTTGLQPILNQFTPANISR	Hex(10)HexNAc(2)	4355.9	4356.93	3	6.5	4.46	223.07	22.83
P06756	Integrin alpha-V	865	ISSLQTTEKNDTVAGQGER	Hex(8)HexNAc(2)	3736.59	3736.61	3	4	7.16	305.58	233.27
P06756	Integrin alpha-V	865	ISSLQTTEKNDTVAGQGERDHLITK	Hex(8)HexNAc(2)	4443.99	4444.02	4	7.2	5.83	226.93	226.93
P06756	Integrin alpha-V	865	ISSLQTTEKNDTVAGQGER	Hex(9)HexNAc(2)	3898.64	3898.66	3	4.1	7.27	284.54	229.8
P06756	Integrin alpha-V	942	ENQNHSYSLK	Hex(6)HexNAc(2)	2598.05	2598.06	3	6.4	3.3	82.6	55.81
P06756	Integrin alpha-V	942	ENQNHSYSLK	Hex(7)HexNAc(2)	2760.1	2760.11	3	3.4	4.86	222.72	174.29
P06756	Integrin alpha-V	942	ENQNHSYSLK	Hex(8)HexNAc(2)	2922.15	2922.16	3	4.1	4.37	138.65	102.96
P07602	Prosaposin	68	DVVTAAGDMLKDNATEEEILVYLEK	Hex(3)HexNAc(3)	3861.77	3861.78	4	2.9	12.52	728.23	535.72
P07602	Prosaposin	93	TC*DWLPKPNMSASC*K	Hex(3)HexNAc(3)	2890.19	2890.21	4	5.9	5.5	432.01	350.68
P07602	Prosaposin	214	TNSTFVQALVEHVKEEC*DR	Hex(3)HexNAc(2)Fuc(1)	3300.46	3300.47	4	3.6	13.2	741.69	640.1
P08195	4F2 cell-surface antigen heavy chain	349	DIENLKDASSFLAEWQNITK	Hex(5)HexNAc(4)Fuc(1)NeuAc(1)	4381.9	4380.93	3	9	2.28	11.96	11.96
P08195	4F2 cell-surface antigen heavy chain	349	DIENLKDASSFLAEWQNITK	Hex(6)HexNAc(5)Fuc(1)NeuAc(3)	5329.22	5329.24	4	3.7	5.18	184.63	15.35
P08195	4F2 cell-surface antigen heavy chain	349	DIENLKDASSFLAEWQNITK	Hex(6)HexNAc(5)NeuAc(3)	5183.16	5184.21	4	8.9	3.54	82.3	24.53
P08195	4F2 cell-surface antigen heavy chain	355	DASSFLAEWQNITK	Hex(5)HexNAc(4)Fuc(1)NeuAc(2)	3960.62	3960.63	3	2.6	4.54	203.19	95.74
P08195	4F2 cell-surface antigen heavy chain	355	DASSFLAEWQNITK	Hex(6)HexNAc(5)Fuc(1)NeuAc(1)	4034.65	4034.66	3	2.2	3.74	191.63	77.3
P08195	4F2 cell-surface antigen heavy chain	355	DASSFLAEWQNITK	Hex(7)HexNAc(6)Fuc(5)NeuAc(3)	5566.21	5567.21	4	0.7	2.76	175.77	58.45
P08581	Hepatocyte growth factor receptor	288	GEGYRGTANTTTAGVPC*QR	Hex(6)HexNAc(4)NeuAc(1)	4071.66	4070.64	4	-4.1	2.18	248.93	146.39
P08581	Hepatocyte growth factor receptor	785	NFTVAC*QHR	Hex(5)HexNAc(4)Fuc(1)NeuAc(1)	3192.27	3192.29	3	7.4	4.12	187.73	89.23
P08581	Hepatocyte growth factor receptor	785	NFTVAC*QHR	Hex(5)HexNAc(4)Fuc(2)NeuAc(1)	3338.32	3338.34	3	4.8	4.37	228.28	90.37
P08582	Melanotransferrin	129	SC*HTGINR	Hex(7)HexNAc(2)	2484.97	828.99	3	-3.5	5.09	411.08	152.86
P08582	Melanotransferrin	129	SC*HTGINR	Hex(8)HexNAc(2)	2647.02	883.009	3	-2.4	5.44	412.96	172.14
P08582	Melanotransferrin	503	DC*DVLTAVSEFFNASC*VPVNNPK	Hex(5)HexNAc(4)Fuc(1)NeuAc(1)	4642.92	4642.94	3	4.4	7.78	254.14	37.12
P08582	Melanotransferrin	503	DC*DVLTAVSEFFNASC*VPVNNPK	Hex(5)HexNAc(4)Fuc(1)NeuAc(2)	4934.02	4934.03	4	2	8.92	507.19	11.48
P08582	Melanotransferrin	503	DC*DVLTAVSEFFNASC*VPVNNPK	Hex(5)HexNAc(4)Fuc(2)NeuAc(1)	4788.98	4789	4	4.6	11.91	651.54	39.12
P08582	Melanotransferrin	503	DC*DVLTAVSEFFNASC*VPVNNPK	Hex(5)HexNAc(4)Fuc(3)NeuAc(1)	4935.04	4934.03	4	-1.4	8.44	579.29	33.49
P08582	Melanotransferrin	503	DC*DVLTAVSEFFNASC*VPVNNPK	Hex(6)HexNAc(5)Fuc(3)NeuAc(1)	5300.17	5300.17	4	-0.1	6.03	373.97	11.91
P08582	Melanotransferrin	503	DC*DVLTAVSEFFNASC*VPVNNPK	Hex(6)HexNAc(5)Fuc(4)NeuAc(1)	5446.23	5445.23	4	2.1	6.58	320.36	11.09
P08582	Melanotransferrin	503	DC*DVLTAVSEFFNASC*VPVNNPK	Hex(9)HexNAc(2)	4447.82	4448.83	3	2.4	4.17	186.86	48.51
P08648	Integrin alpha-5	864	VTGLNC*TTNHPINPK	Hex(5)HexNAc(4)Fuc(1)NeuAc(2)	4016.67	4016.68	3	2.4	6.15	326.84	37.47
P08648	Integrin alpha-5	864	VTGLNC*TTNHPINPK	Hex(5)HexNAc(4)Fuc(2)NeuAc(1)	3871.63	3871.63	3	0.8	6.95	389.65	106.39
P08648	Integrin alpha-5	864	VTGLNC*TTNHPINPK	Hex(5)HexNAc(4)NeuAc(2)	3870.61	3870.64	3	8.2	3.38	224.25	30.3
P08648	Integrin alpha-5	864	VTGLNC*TTNHPINPK	Hex(9)HexNAc(2)	3530.47	3530.48	3	1	6.05	250.03	68.95
P08962	CD63 antigen	129	NNHTASILDR	Hex(10)HexNAc(2)	3167.26	3167.26	3	0.2	2.25	182.83	94.24
P08962	CD63 antigen	129	NNHTASILDR	Hex(5)HexNAc(4)Fuc(2)NeuAc(1)	3346.37	3346.38	3	3.7	2.14	164.26	59.82
P09758	Tumor-associated calcium signal transducer 2	118	QC*NQTSVC*WC*VNSVGVR	Hex(5)HexNAc(6)	4082.64	4081.62	3	-3.2	4.7	318.82	14.19
P09758	Tumor-associated calcium signal transducer 2	118	QC*NQTSVC*WC*VNSVGVR	Hex(6)HexNAc(2)	3432.38	1144.8	3	-0.9	5.39	224.71	166.77
P09758	Tumor-associated calcium signal transducer 2	118	QC*NQTSVC*WC*VNSVGVR	Hex(7)HexNAc(2)	3594.43	3594.43	3	-0.7	7.13	413.86	327.45
P09758	Tumor-associated calcium signal transducer 2	118	QC*NQTSVC*WC*VNSVGVR	Hex(8)HexNAc(2)	3756.48	3756.5	3	4	7.76	394.11	273.8
P09758	Tumor-associated calcium signal transducer 2	160	HRPTAGAFNHSDLDAELR	Hex(5)HexNAc(4)Fuc(1)NeuAc(2)	4357.81	4357.83	4	4	8.55	528.56	73.33
P09758	Tumor-associated calcium signal transducer 2	160	HRPTAGAFNHSDLDAELRR	Hex(5)HexNAc(4)Fuc(2)NeuAc(1)	4368.87	4368.9	5	5.7	14.18	778.45	36.39
P09758	Tumor-associated calcium signal transducer 2	160	HRPTAGAFNHSDLDAELR	Hex(5)HexNAc(4)NeuAc(2)	4211.75	4212.79	4	8	15.29	827.63	13.3
P09758	Tumor-associated calcium signal transducer 2	160	HRPTAGAFNHSDLDAELRR	Hex(5)HexNAc(5)Fuc(4)NeuAc(2)	5155.16	5154.17	5	2.1	4.66	130.06	57.18
P09758	Tumor-associated calcium signal transducer 2	160	HRPTAGAFNHSDLDAELR	Hex(5)HexNAc(7)NeuAc(1)	4529.89	4530.92	4	4.2	3.18	166.95	33.08
P09758	Tumor-associated calcium signal transducer 2	160	HRPTAGAFNHSDLDAELRR	Hex(6)HexNAc(5)Fuc(1)NeuAc(3)	5170.14	5170.18	5	8.4	5.52	239.74	61.4
P09758	Tumor-associated calcium signal transducer 2	160	HRPTAGAFNHSDLDAELRR	Hex(6)HexNAc(5)Fuc(2)NeuAc(2)	4869	4868.03	4	7.2	5.09	232.86	163.21
P09758	Tumor-associated calcium signal transducer 2	160	HRPTAGAFNHSDLDAELRR	Hex(6)HexNAc(5)Fuc(3)NeuAc(2)	5171.16	5172.15	5	-2.2	4.13	140.6	113.2
P09758	Tumor-associated calcium signal transducer 2	160	HRPTAGAFNHSDLDAELRR	Hex(6)HexNAc(5)Fuc(4)NeuAc(1)	5026.12	5026.14	5	4.4	5.31	250.84	34.85
P09758	Tumor-associated calcium signal transducer 2	160	HRPTAGAFNHSDLDAELRR	Hex(6)HexNAc(5)NeuAc(3)	5024.08	5025.13	5	8.4	9.19	498.2	51.3
P09758	Tumor-associated calcium signal transducer 2	160	HRPTAGAFNHSDLDAELRR	Hex(7)HexNAc(6)Fuc(1)NeuAc(3)	5535.27	5535.29	5	3.8	7.2	251.55	39.08
P09758	Tumor-associated calcium signal transducer 2	160	HRPTAGAFNHSDLDAELRR	Hex(7)HexNAc(6)Fuc(5)NeuAc(1)	5537.31	5538.3	5	-2.7	4.72	162.32	137.7
P09758	Tumor-associated calcium signal transducer 2	160	HRPTAGAFNHSDLDAELRR	Hex(7)HexNAc(7)Fuc(4)NeuAc(2)	5885.43	5886.45	5	3.8	5	95.18	95.18
P09758	Tumor-associated calcium signal transducer 2	160	HRPTAGAFNHSDLDAELRR	Hex(7)HexNAc(7)NeuAc(4)	5883.39	5884.4	5	2.3	5.63	169.51	35.82
P09758	Tumor-associated calcium signal transducer 2	160	HRPTAGAFNHSDLDAELR	Hex(8)HexNAc(2)	3709.56	3709.57	4	1.4	6.86	402.71	275.22
P09758	Tumor-associated calcium signal transducer 2	160	HRPTAGAFNHSDLDAELRR	Hex(9)HexNAc(2)	4027.71	4027.74	4	7.4	10.78	685.13	334.95
P09758	Tumor-associated calcium signal transducer 2	160	HRPTAGAFNHSDLDAELR	Hex(10)HexNAc(2)	4033.67	4034.68	4	3.7	15.4	805.23	380.46
P10314	HLA class I histocompatibility antigen, A-32 alpha chain	108	YYNQSEAGSHTIQMMYGC*DVGPDGR	Hex(4)HexNAc(5)Fuc(2)NeuAc(1)	5083	5083.03	4	5.8	5.65	471.52	16.42
P10314	HLA class I histocompatibility antigen, A-32 alpha chain	108	YYNQSEAGSHTIQMMYGC*DVGPDGR	Hex(4)HexNAc(7)NeuAc(1)	5197.04	5197.07	5	7.1	2.66	174.3	26.4
P10314	HLA class I histocompatibility antigen, A-32 alpha chain	108	YYNQSEAGSHTIQMMYGC*DVGPDGR	Hex(5)HexNAc(3)Fuc(2)NeuAc(1)	4838.89	4839.9	4	1.7	3.75	170.46	36.1
P10314	HLA class I histocompatibility antigen, A-32 alpha chain	108	YYNQSEAGSHTIQMMYGC*DVGPDGR	Hex(7)HexNAc(4)NeuAc(1)	5073.96	5075.01	4	8.9	2.28	79.63	11.62
P10321	HLA class I histocompatibility antigen, Cw-7 alpha chain	107	GYYNQSEDGSHTLQR	Hex(10)HexNAc(2)	3781.46	3781.47	3	3.8	7.62	418.2	367.34
P10321	HLA class I histocompatibility antigen, Cw-7 alpha chain	107	GYYNQSEDGSHTLQR	Hex(3)HexNAc(4)Fuc(1)	3199.31	3199.31	3	2.5	2.61	173.66	89.66
P10321	HLA class I histocompatibility antigen, Cw-7 alpha chain	107	GYYNQSEDGSHTLQR	Hex(4)HexNAc(5)Fuc(2)NeuAc(1)	4001.59	4001.62	3	5.9	2.38	199.51	21.02
P10321	HLA class I histocompatibility antigen, Cw-7 alpha chain	107	GYYNQSEDGSHTLQR	Hex(4)HexNAc(5)Fuc(4)	4002.61	4001.64	3	7	2.48	164.46	45.53
P10321	HLA class I histocompatibility antigen, Cw-7 alpha chain	107	GYYNQSEDGSHTLQR	Hex(8)HexNAc(2)	3457.35	3457.37	3	3.4	6.98	321.73	231.77
P10321	HLA class I histocompatibility antigen, Cw-7 alpha chain	107	GYYNQSEDGSHTLQR	Hex(9)HexNAc(2)	3619.41	3619.42	3	3	7.1	355.78	287.05
P10909	Clusterin	290	HNSTGC*LR	Hex(7)HexNAc(2)	2484.97	828.994	3	0.6	2.59	253.68	41.92
P10909	Clusterin	290	HNSTGC*LR	Hex(8)HexNAc(2)	2647.02	883.007	3	-3.9	3.03	266.78	133
P11047	Laminin subunit gamma-1	647	LLNNLTSIK	Hex(8)HexNAc(2)	2718.2	1359.6	2	1.4	5.9	355.71	199.23
P11047	Laminin subunit gamma-1	647	LLNNLTSIK	Hex(9)HexNAc(2)	2880.25	1440.62	2	-2.7	2.71	237.88	141.67
P11047	Laminin subunit gamma-1	1106	VNNTLSSQISR	Hex(8)HexNAc(2)	2921.22	2921.22	3	-0.2	2.71	204.46	95.75
P11047	Laminin subunit gamma-1	1203	TANDTSTEAYNLLLR	Hex(8)HexNAc(2)	3384.42	3384.42	3	0.3	7.03	400.8	229.33
P11047	Laminin subunit gamma-1	1218	TLAGENQTAFEIEELNR	Hex(8)HexNAc(2)	3637.53	3637.55	3	6.8	6.47	406.93	326.29
P11047	Laminin subunit gamma-1	1241	NISQDLEK	Hex(8)HexNAc(2)	2649.07	2649.07	2	1.7	5.08	315.14	42.37
P11047	Laminin subunit gamma-1	1390	KIPAINQTITEANEK	Hex(8)HexNAc(2)	3372.49	3372.5	3	1.8	4.5	231.04	222.61
P11279	Lysosome-associated membrane glycoprotein 1	78	SSC*GKENTSDPSLVIAFGR	Hex(4)HexNAc(3)Fuc(1)NeuAc(1)	3719.57	3719.57	3	0.2	6	242.3	99.83
P11279	Lysosome-associated membrane glycoprotein 1	78	SSC*GKENTSDPSLVIAFGR	Hex(4)HexNAc(4)Fuc(2)NeuAc(1)	4068.71	4067.72	3	4.1	2.93	29.29	29.29
P11279	Lysosome-associated membrane glycoprotein 1	78	SSC*GKENTSDPSLVIAFGR	Hex(5)HexNAc(4)Fuc(1)NeuAc(1)	4084.71	4084.74	3	9.1	6.6	268.43	51.88
P11279	Lysosome-associated membrane glycoprotein 1	78	SSC*GKENTSDPSLVIAFGR	Hex(5)HexNAc(4)Fuc(1)NeuAc(2)	4375.8	4374.8	3	1	6.8	300.42	107.4
P11279	Lysosome-associated membrane glycoprotein 1	78	SSC*GKENTSDPSLVIAFGR	Hex(6)HexNAc(6)Fuc(2)NeuAc(3)	5381.17	5380.18	4	3.5	7.83	408.43	340.35
P11279	Lysosome-associated membrane glycoprotein 1	78	SSC*GKENTSDPSLVIAFGR	Hex(6)HexNAc(6)NeuAc(3)	5089.05	5088.06	4	1.7	6.98	304.25	227.82
P11279	Lysosome-associated membrane glycoprotein 1	78	SSC*GKENTSDPSLVIAFGR	Hex(7)HexNAc(6)Fuc(1)NeuAc(2)	5106.07	5105.07	4	1.3	6.79	264.89	203.86
P11279	Lysosome-associated membrane glycoprotein 1	78	SSC*GKENTSDPSLVIAFGR	Hex(7)HexNAc(6)Fuc(1)NeuAc(3)	5397.16	5397.19	4	6	7.42	357.95	26.7
P11279	Lysosome-associated membrane glycoprotein 1	78	SSC*GKENTSDPSLVIAFGR	Hex(7)HexNAc(6)Fuc(1)NeuAc(4)	5688.26	5687.28	4	4.5	7.65	302.03	221.9
P11279	Lysosome-associated membrane glycoprotein 1	78	SSC*GKENTSDPSLVIAFGR	Hex(9)HexNAc(2)	3889.6	3889.6	3	0	6.65	236.92	142.23
P11279	Lysosome-associated membrane glycoprotein 1	83	ENTSDPSLVIAFGR	Hex(9)HexNAc(2)	3370.39	3370.42	3	7.8	3.25	219.12	219.12
P11279	Lysosome-associated membrane glycoprotein 1	97	GHTLTLNFTR	Hex(5)HexNAc(2)	2376.04	792.687	3	0.5	6.35	390.55	197.29
P11279	Lysosome-associated membrane glycoprotein 1	97	GHTLTLNFTR	Hex(6)HexNAc(2)	2538.1	846.703	3	-0.8	10.78	619.71	453.91
P11279	Lysosome-associated membrane glycoprotein 1	97	GHTLTLNFTR	Hex(6)HexNAc(3)NeuAc(1)	2798.2	933.403	3	-1.1	2.5	220.51	111.67
P11279	Lysosome-associated membrane glycoprotein 1	97	GHTLTLNFTR	Hex(7)HexNAc(2)	2700.15	2700.16	4	5.3	5.5	436.31	343.98
P11279	Lysosome-associated membrane glycoprotein 1	97	GHTLTLNFTR	Hex(8)HexNAc(2)	2862.2	954.738	3	-1.4	6.86	536.6	297.97
P11279	Lysosome-associated membrane glycoprotein 1	97	GHTLTLNFTR	Hex(9)HexNAc(2)	3024.26	1008.76	3	-1.5	6.78	464.88	319.35
P11279	Lysosome-associated membrane glycoprotein 1	247	KDNTTVTR	Hex(4)HexNAc(3)Fuc(1)	2338	780.007	3	1.2	5.07	333.52	101.56
P11279	Lysosome-associated membrane glycoprotein 1	247	KDNTTVTR	Hex(4)HexNAc(3)Fuc(1)NeuAc(1)	2629.1	877.036	3	-1.7	5.06	348.78	93.46
P11279	Lysosome-associated membrane glycoprotein 1	247	KDNTTVTR	Hex(5)HexNAc(4)Fuc(1)NeuAc(2)	3285.33	1095.78	3	0.9	2.33	247.93	50.51
P11279	Lysosome-associated membrane glycoprotein 1	247	KDNTTVTR	Hex(5)HexNAc(4)Fuc(2)	2849.19	950.4	3	-2	2.35	282.23	25.58
P11279	Lysosome-associated membrane glycoprotein 1	247	KDNTTVTR	Hex(6)HexNAc(5)Fuc(3)NeuAc(1)	3651.48	3651.5	3	6.9	3.88	166.61	49.91
P11279	Lysosome-associated membrane glycoprotein 1	247	KDNTTVTR	Hex(6)HexNAc(5)Fuc(3)NeuAc(2)	3942.57	3942.58	3	2.3	2.04	152.48	22.82
P11279	Lysosome-associated membrane glycoprotein 1	255	LLNINPNK	HexNAc(2)Hex(5)	2141.97	1071.49	2	2.8	5.93	361.69	244.28
P11279	Lysosome-associated membrane glycoprotein 1	255	LLNINPNK	Hex(5)HexNAc(4)Fuc(2)NeuAc(1)	3131.34	3131.36	3	8.2	2.17	164.96	86.37
P11279	Lysosome-associated membrane glycoprotein 1	255	LLNINPNK	Hex(6)HexNAc(2)	2304.02	2304.03	2	1.2	6	475.87	159.41
P11279	Lysosome-associated membrane glycoprotein 1	255	LLNINPNK	Hex(6)HexNAc(3)	2507.1	2507.11	2	4.7	2.17	202.86	56.23
P11279	Lysosome-associated membrane glycoprotein 1	255	LLNINPNK	Hex(6)HexNAc(3)NeuAc(1)	2798.2	933.403	3	-1.1	2.5	220.51	111.67
P11279	Lysosome-associated membrane glycoprotein 1	255	LLNINPNK	Hex(6)HexNAc(5)Fuc(1)	3059.32	3059.34	3	5.8	2.28	146.68	73.35
P11279	Lysosome-associated membrane glycoprotein 1	255	LLNINPNK	Hex(6)HexNAc(5)Fuc(2)	3205.38	3205.39	3	5.8	3.2	148.24	86.62
P11279	Lysosome-associated membrane glycoprotein 1	255	LLNINPNK	Hex(6)HexNAc(5)Fuc(3)	3351.43	3351.46	3	7	2.28	81.28	80.4
P11279	Lysosome-associated membrane glycoprotein 1	255	LLNINPNK	Hex(6)HexNAc(5)Fuc(4)NeuAc(1)	3788.59	3788.6	3	3.8	2.23	92.01	45.94
P11279	Lysosome-associated membrane glycoprotein 1	255	LLNINPNK	Hex(7)HexNAc(2)	2466.07	2466.08	2	2.8	4.72	374.1	76.27
P11279	Lysosome-associated membrane glycoprotein 1	255	LLNINPNK	Hex(7)HexNAc(6)Fuc(1)	3424.45	3424.46	3	1.8	3.05	201.13	103.28
P11279	Lysosome-associated membrane glycoprotein 1	255	LLNINPNK	Hex(7)HexNAc(6)Fuc(2)NeuAc(1)	3861.6	3861.63	3	6	2.16	142.24	76.8
P11279	Lysosome-associated membrane glycoprotein 1	255	LLNINPNK	Hex(7)HexNAc(6)Fuc(3)	3716.57	3716.58	3	4.2	2.33	65.37	55.41
P11279	Lysosome-associated membrane glycoprotein 1	255	LLNINPNK	Hex(7)HexNAc(6)Fuc(4)	3862.62	3862.64	3	3.1	2.23	84.87	51.07
P11279	Lysosome-associated membrane glycoprotein 1	255	LLNINPNK	Hex(8)HexNAc(2)	2628.13	2628.13	2	2.5	5.75	332.73	115.92
P11717	Cation-independent mannose-6-phosphate receptor	398	YHNQTLR	Hex(7)HexNAc(2)	2472	824.673	3	0.4	5.23	358.24	102.25
P11717	Cation-independent mannose-6-phosphate receptor	398	YHNQTLR	Hex(8)HexNAc(2)	2634.06	2634.06	3	0.7	3.26	298.02	35.78
P11717	Cation-independent mannose-6-phosphate receptor	398	YHNQTLR	Hex(9)HexNAc(2)	2796.11	2796.1	3	-1.4	2.74	254.72	37.39
P11717	Cation-independent mannose-6-phosphate receptor	578	IKTNITLVC*KPGDLESAPVLR	Hex(8)HexNAc(2)	4026.88	4025.89	4	3.4	9.31	505.61	435.07
P11717	Cation-independent mannose-6-phosphate receptor	580	TNITLVC*KPGDLESAPVLR	Hex(7)HexNAc(2)	3623.65	1208.56	3	0.3	5.88	247.38	140.41
P11717	Cation-independent mannose-6-phosphate receptor	580	TNITLVC*KPGDLESAPVLR	Hex(8)HexNAc(2)	3785.7	3785.69	3	-2.4	6.3	332.36	302.34
P11717	Cation-independent mannose-6-phosphate receptor	734	DAGVGFPEYQEEDNSTYNFR	Hex(9)HexNAc(2)	4202.62	4201.65	3	8.1	7.82	384.99	301.24
P11717	Cation-independent mannose-6-phosphate receptor	855	TGPVVEDSGSLLLEYVNGSAC*TTSDGR	Hex(5)HexNAc(4)Fuc(1)NeuAc(1)	4844.03	4844.05	4	3.7	6.63	308.49	22.99
P11717	Cation-independent mannose-6-phosphate receptor	855	TGPVVEDSGSLLLEYVNGSAC*TTSDGR	Hex(5)HexNAc(4)Fuc(2)NeuAc(1)	4990.09	4990.12	4	6.5	6.17	261.15	25.01
P11717	Cation-independent mannose-6-phosphate receptor	855	TGPVVEDSGSLLLEYVNGSAC*TTSDGR	Hex(5)HexNAc(4)Fuc(3)	4845.05	4844.06	4	1.5	7.35	470.63	41.23
P12955	Xaa-Pro dipeptidase	169	FEVNNTILHPEIVEC*R	Hex(6)HexNAc(6)Fuc(1)NeuAc(1)	4597.93	4598.95	3	4.9	2.15	36.4	12.99
P13473	Lysosome-associated membrane glycoprotein 2	248	VASVININPNTTHSTGSC*R	Hex(5)HexNAc(4)Fuc(1)	3796.63	3796.65	3	4.1	4.11	210.19	185.57
P13473	Lysosome-associated membrane glycoprotein 2	248	VASVININPNTTHSTGSC*R	Hex(5)HexNAc(4)Fuc(1)NeuAc(1)	4087.73	4087.75	4	6	10.06	602.81	148.36
P13473	Lysosome-associated membrane glycoprotein 2	248	VASVININPNTTHSTGSC*R	Hex(6)HexNAc(4)Fuc(1)NeuAc(1)	4249.78	4248.81	4	6.9	4.25	253.99	203.6
P13473	Lysosome-associated membrane glycoprotein 2	248	VASVININPNTTHSTGSC*R	Hex(6)HexNAc(4)Fuc(3)NeuAc(2)	4832.99	4833.03	4	7.7	7.06	445.86	369.27
P13473	Lysosome-associated membrane glycoprotein 2	248	VASVININPNTTHSTGSC*R	Hex(6)HexNAc(5)Fuc(1)	4161.76	4161.78	4	4.9	9.18	546.85	438.85
P13473	Lysosome-associated membrane glycoprotein 2	248	VASVININPNTTHSTGSC*R	Hex(6)HexNAc(5)Fuc(2)	4307.82	4308.85	3	6.1	4.71	71.38	56.44
P13473	Lysosome-associated membrane glycoprotein 2	248	VASVININPNTTHSTGSC*R	Hex(6)HexNAc(5)Fuc(2)NeuAc(1)	4598.92	4599.94	4	4.7	6.79	298.04	58.2
P13473	Lysosome-associated membrane glycoprotein 2	248	VASVININPNTTHSTGSC*R	Hex(6)HexNAc(5)Fuc(2)NeuAc(2)	4890.01	4890.06	4	9.3	5.92	277.85	21.49
P13473	Lysosome-associated membrane glycoprotein 2	248	VASVININPNTTHSTGSC*R	Hex(6)HexNAc(5)Fuc(3)	4453.88	4452.88	3	1.5	6.94	262.24	38
P13473	Lysosome-associated membrane glycoprotein 2	248	VASVININPNTTHSTGSC*R	Hex(6)HexNAc(5)Fuc(4)NeuAc(1)	4891.03	4892.05	4	2.3	6.71	320.05	265.64
P13473	Lysosome-associated membrane glycoprotein 2	248	VASVININPNTTHSTGSC*R	Hex(6)HexNAc(5)NeuAc(2)	4597.9	4596.94	4	9.9	6.22	275.52	173.87
P13473	Lysosome-associated membrane glycoprotein 2	248	VASVININPNTTHSTGSC*R	Hex(6)HexNAc(6)NeuAc(3)	5092.07	5091.11	4	7.1	6.65	265.11	181.93
P13473	Lysosome-associated membrane glycoprotein 2	248	VASVININPNTTHSTGSC*R	Hex(7)HexNAc(5)Fuc(1)NeuAc(1)	4614.91	4613.95	4	8.1	4.63	242.37	229
P13473	Lysosome-associated membrane glycoprotein 2	248	VASVININPNTTHSTGSC*R	Hex(7)HexNAc(5)Fuc(2)NeuAc(1)	4760.97	4760.01	4	8.7	4.54	257.4	222.14
P13473	Lysosome-associated membrane glycoprotein 2	248	VASVININPNTTHSTGSC*R	Hex(7)HexNAc(6)Fuc(1)	4526.9	4526.93	4	6.3	10.73	634.85	498.2
P13473	Lysosome-associated membrane glycoprotein 2	248	VASVININPNTTHSTGSC*R	Hex(7)HexNAc(6)Fuc(1)NeuAc(1)	4817.99	4819.03	4	6.7	7.08	396.25	16.64
P13473	Lysosome-associated membrane glycoprotein 2	248	VASVININPNTTHSTGSC*R	Hex(7)HexNAc(6)Fuc(1)NeuAc(2)	5109.09	5109.13	4	7.9	6.89	309.79	27
P13473	Lysosome-associated membrane glycoprotein 2	248	VASVININPNTTHSTGSC*R	Hex(7)HexNAc(6)Fuc(2)	4672.95	4672.98	4	6.4	8.62	471.76	33.87
P13473	Lysosome-associated membrane glycoprotein 2	248	VASVININPNTTHSTGSC*R	Hex(7)HexNAc(6)Fuc(2)NeuAc(1)	4964.05	4963.06	4	3.6	7.07	357.23	33.86
P13473	Lysosome-associated membrane glycoprotein 2	248	VASVININPNTTHSTGSC*R	Hex(7)HexNAc(6)Fuc(3)	4819.01	4820.02	4	1.3	4.79	238.95	209.46
P13473	Lysosome-associated membrane glycoprotein 2	248	VASVININPNTTHSTGSC*R	Hex(7)HexNAc(6)Fuc(3)NeuAc(1)	5110.11	5111.12	4	2.6	6.66	245.84	51.2
P13473	Lysosome-associated membrane glycoprotein 2	248	VASVININPNTTHSTGSC*R	Hex(7)HexNAc(6)Fuc(4)	4965.07	4966.11	4	7.4	6.8	280.32	236.02
P13473	Lysosome-associated membrane glycoprotein 2	248	VASVININPNTTHSTGSC*R	Hex(7)HexNAc(6)NeuAc(1)	4671.93	4672.98	4	8.1	5.08	237.73	24.73
P13473	Lysosome-associated membrane glycoprotein 2	248	VASVININPNTTHSTGSC*R	Hex(7)HexNAc(7)Fuc(2)	4876.03	4877.07	4	7.6	4.76	233.06	213.34
P13473	Lysosome-associated membrane glycoprotein 2	248	VASVININPNTTHSTGSC*R	Hex(8)HexNAc(2)	3730.57	3730.59	3	4.5	7.47	285.05	234.53
P13473	Lysosome-associated membrane glycoprotein 2	248	VASVININPNTTHSTGSC*R	Hex(9)HexNAc(2)	3892.63	3892.66	3	9.5	5.32	207.83	178.2
P13473	Lysosome-associated membrane glycoprotein 2	352	VQPFNVTQGK	Hex(6)HexNAc(2)	2496.08	2496.08	2	1.9	6.23	418.41	187.3
P13473	Lysosome-associated membrane glycoprotein 2	352	VQPFNVTQGK	Hex(6)HexNAc(3)NeuAc(1)	2990.25	997.423	3	1.1	6.2	399.91	220.83
P13473	Lysosome-associated membrane glycoprotein 2	352	VQPFNVTQGK	Hex(6)HexNAc(5)Fuc(2)	3397.43	3397.44	3	3.7	2.41	200.56	155.08
P13473	Lysosome-associated membrane glycoprotein 2	352	VQPFNVTQGK	Hex(7)HexNAc(2)	2658.13	2658.13	3	0.2	6.39	286.17	163.66
P13473	Lysosome-associated membrane glycoprotein 2	352	VQPFNVTQGK	Hex(8)HexNAc(2)	2820.18	2820.18	2	-0.6	6.62	281.83	161.61
P13688	Carcinoembryonic antigen-related cell adhesion molecule 1	374	LSQGNTTLSINPVKR	Hex(8)HexNAc(2)	3330.49	3330.5	3	0.9	6.71	332.26	103.17
P13987	CD59 glycoprotein	40	TAVNC*SSDFDAC*LITK	Hex(5)HexNAc(4)Fuc(1)NeuAc(1)	3861.54	3861.56	3	5.3	5.17	235.31	157.63
P13987	CD59 glycoprotein	40	TAVNC*SSDFDAC*LITK	Hex(5)HexNAc(4)Fuc(1)NeuAc(2)	4152.64	4152.65	3	3.4	7.33	275.34	15.34
P13987	CD59 glycoprotein	40	TAVNC*SSDFDAC*LITK	Hex(5)HexNAc(4)Fuc(2)NeuAc(1)	4007.6	4007.63	3	7.2	5.68	282.55	206.33
P13987	CD59 glycoprotein	40	TAVNC*SSDFDAC*LITK	Hex(5)HexNAc(4)Fuc(3)	3862.56	3862.57	3	1.9	2.27	107.46	37.86
P13987	CD59 glycoprotein	40	TAVNC*SSDFDAC*LITK	Hex(5)HexNAc(4)Fuc(3)NeuAc(1)	4153.66	4154.69	3	7	5.53	158.2	55.76
P13987	CD59 glycoprotein	40	TAVNC*SSDFDAC*LITK	Hex(6)HexNAc(4)Fuc(3)	4024.62	4023.64	3	5.8	2.38	135.27	83.21
P13987	CD59 glycoprotein	40	TAVNC*SSDFDAC*LITK	Hex(6)HexNAc(4)Fuc(1)NeuAc(1)	4023.6	4022.63	3	9.7	5.46	294.64	233.63
P15144	Aminopeptidase N	126	KLNYTLSQGHR	Hex(4)HexNAc(3)NeuAc(1)	2865.25	2865.27	3	6.3	2.82	101.55	69.41
P15144	Aminopeptidase N	126	KLNYTLSQGHR	Hex(5)HexNAc(2)	2533.13	2533.15	3	9.6	3.84	305.64	94.07
P15144	Aminopeptidase N	126	KLNYTLSQGHR	Hex(5)HexNAc(4)	2939.29	2939.3	4	3.1	6.24	453.7	317.61
P15144	Aminopeptidase N	126	KLNYTLSQGHR	Hex(5)HexNAc(4)Fuc(1)	3085.35	3085.36	4	3	6.17	448.29	260.59
P15144	Aminopeptidase N	126	KLNYTLSQGHR	Hex(5)HexNAc(4)Fuc(1)NeuAc(1)	3376.44	3376.46	4	4.4	6.73	540	307.5
P15144	Aminopeptidase N	126	KLNYTLSQGHR	Hex(5)HexNAc(4)Fuc(2)	3231.4	3231.43	4	6.7	3.79	221.59	98.31
P15144	Aminopeptidase N	126	KLNYTLSQGHR	Hex(5)HexNAc(4)NeuAc(1)	3230.38	3230.42	4	9.9	6.42	539.33	336.16
P15144	Aminopeptidase N	126	KLNYTLSQGHR	Hex(5)HexNAc(4)NeuAc(2)	3521.48	3521.5	4	4.5	7.55	565.35	307.6
P15144	Aminopeptidase N	126	KLNYTLSQGHR	Hex(5)HexNAc(5)	3142.37	3142.38	4	3.1	6.1	350.53	228.97
P15144	Aminopeptidase N	126	KLNYTLSQGHR	Hex(6)HexNAc(2)	2695.18	2695.19	4	3.8	6.3	398.75	310.02
P15144	Aminopeptidase N	126	KLNYTLSQGHR	Hex(6)HexNAc(3)NeuAc(1)	3189.36	3189.37	3	2.7	6.07	251.4	122.51
P15144	Aminopeptidase N	126	KLNYTLSQGHR	Hex(7)HexNAc(2)	2857.24	2857.24	3	2.4	5.72	324.07	116.68
P15144	Aminopeptidase N	126	KLNYTLSQGHR	Hex(8)HexNAc(2)	3019.29	3019.3	3	3.1	5.34	327.3	109.26
P15144	Aminopeptidase N	126	KLNYTLSQGHR	Hex(9)HexNAc(2)	3181.34	3181.35	3	3.7	4.73	227.99	175.45
P15144	Aminopeptidase N	127	LNYTLSQGHR	Hex(4)HexNAc(3)Fuc(2)	2738.18	2738.2	3	8.3	3.3	123	53.22
P15144	Aminopeptidase N	231	AEFNITLIHPK	Hex(5)HexNAc(3)Fuc(1)	2848.28	950.095	3	-2.1	4.46	285.76	112.77
P15144	Aminopeptidase N	231	AEFNITLIHPK	Hex(5)HexNAc(4)Fuc(1)	3051.35	1017.79	3	0.1	6.16	394.58	163.38
P15144	Aminopeptidase N	231	AEFNITLIHPK	Hex(5)HexNAc(4)Fuc(2)	3197.41	3197.42	3	3	4.88	247.22	85.51
P15144	Aminopeptidase N	231	AEFNITLIHPK	Hex(5)HexNAc(4)NeuAc(1)	3196.39	3196.39	3	0.5	6.11	262.93	120.08
P15144	Aminopeptidase N	231	AEFNITLIHPK	Hex(6)HexNAc(3)NeuAc(1)	3155.37	1052.46	3	2.1	5.4	262.6	148.92
P15144	Aminopeptidase N	231	AEFNITLIHPK	Hex(6)HexNAc(5)NeuAc(2)	3852.62	3852.63	3	3	3.38	203.32	99.91
P15144	Aminopeptidase N	231	AEFNITLIHPK	Hex(7)HexNAc(2)	2823.24	2823.24	3	-0.5	6.34	283.02	115.13
P15144	Aminopeptidase N	253	GPSTPLPEDPNWNVTEFHTTPK	Hex(5)HexNAc(4)Fuc(1)NeuAc(1)	4523.91	4523.96	4	9.4	6.2	333.51	76.43
P15144	Aminopeptidase N	253	GPSTPLPEDPNWNVTEFHTTPK	Hex(5)HexNAc(4)NeuAc(1)	4377.85	4377.87	4	4.1	6.76	333.41	30.51
P15144	Aminopeptidase N	253	GPSTPLPEDPNWNVTEFHTTPK	Hex(5)HexNAc(4)NeuAc(2)	4668.95	4667.96	4	2.3	6.89	316.94	222.56
P15144	Aminopeptidase N	253	GPSTPLPEDPNWNVTEFHTTPK	Hex(5)HexNAc(5)Fuc(1)NeuAc(2)	5018.09	5017.1	4	2.9	6.85	276.61	247.44
P15144	Aminopeptidase N	253	GPSTPLPEDPNWNVTEFHTTPK	Hex(6)HexNAc(4)Fuc(2)NeuAc(2)	5123.12	5123.07	4	-9.1	5.91	242.93	242.93
P15144	Aminopeptidase N	253	GPSTPLPEDPNWNVTEFHTTPK	Hex(6)HexNAc(5)Fuc(1)NeuAc(1)	4889.05	4889.07	4	4.1	4.68	226.49	64.42
P15144	Aminopeptidase N	253	GPSTPLPEDPNWNVTEFHTTPK	Hex(6)HexNAc(5)Fuc(1)NeuAc(2)	5180.14	5180.17	4	5.5	7.74	361.59	23.66
P15144	Aminopeptidase N	253	GPSTPLPEDPNWNVTEFHTTPK	Hex(6)HexNAc(5)Fuc(2)NeuAc(2)	5326.2	5325.2	4	1.1	6.6	273.17	36.42
P15144	Aminopeptidase N	253	GPSTPLPEDPNWNVTEFHTTPK	Hex(6)HexNAc(5)NeuAc(1)	4742.99	4743	3	3.4	6.5	219.2	51.8
P15144	Aminopeptidase N	253	GPSTPLPEDPNWNVTEFHTTPK	Hex(6)HexNAc(5)NeuAc(2)	5034.08	5034.11	4	5.8	6.8	290.67	33.22
P15144	Aminopeptidase N	253	GPSTPLPEDPNWNVTEFHTTPK	Hex(6)HexNAc(5)NeuAc(3)	5325.18	5325.19	4	2.6	7.04	337.36	59.65
P15144	Aminopeptidase N	253	GPSTPLPEDPNWNVTEFHTTPK	Hex(6)HexNAc(6)Fuc(1)NeuAc(2)	5383.22	5382.24	4	4.1	4.88	139.23	114.3
P15144	Aminopeptidase N	253	GPSTPLPEDPNWNVTEFHTTPK	Hex(6)HexNAc(6)Fuc(2)NeuAc(3)	5820.37	5819.39	4	3.6	5.37	146.84	146.84
P15144	Aminopeptidase N	253	GPSTPLPEDPNWNVTEFHTTPK	Hex(7)HexNAc(6)Fuc(1)NeuAc(2)	5545.27	5545.3	4	5.5	4.83	164.61	17.23
P15144	Aminopeptidase N	253	GPSTPLPEDPNWNVTEFHTTPK	Hex(7)HexNAc(6)Fuc(1)NeuAc(3)	5836.37	5836.39	4	4.2	7.51	256.06	24.05
P15144	Aminopeptidase N	253	GPSTPLPEDPNWNVTEFHTTPK	Hex(7)HexNAc(6)NeuAc(2)	5399.21	5399.24	4	5.2	7.51	279.97	39.35
P15144	Aminopeptidase N	253	GPSTPLPEDPNWNVTEFHTTPK	Hex(7)HexNAc(6)NeuAc(3)	5690.31	5690.34	4	5.5	7.55	283.04	24.43
P15144	Aminopeptidase N	253	GPSTPLPEDPNWNVTEFHTTPK	Hex(7)HexNAc(6)NeuAc(4)	5981.41	5980.42	4	3.2	7.61	251.73	220.43
P15144	Aminopeptidase N	253	GPSTPLPEDPNWNVTEFHTTPK	Hex(9)HexNAc(2)	4328.81	4327.82	3	3.8	6.8	233.17	219.82
P15144	Aminopeptidase N	674	VPVTLALNNTLFLIEER	Hex(5)HexNAc(4)NeuAc(2)	4146.87	4146.9	3	5.4	5.09	124.55	14.8
P15144	Aminopeptidase N	818	NATLVNEADKLR	Hex(6)HexNAc(6)NeuAc(2)	4116.71	4115.73	4	6	2.15	187.49	57.77
P15144	Aminopeptidase N	818	NATLVNEADKLR	Hex(6)HexNAc(6)NeuAc(3)	4407.81	4406.83	4	6	2.28	182.23	43.85
P15144	Aminopeptidase N	818	NATLVNEADKLR	Hex(7)HexNAc(6)Fuc(1)NeuAc(2)	4424.82	4423.83	4	3.3	2.22	223.25	60.97
P15151	Poliovirus receptor	115	VEDEGNYTC*LFVTFPQGSR	Hex(5)HexNAc(4)Fuc(2)NeuAc(1)	4424.8	4424.83	4	6.8	6.04	329.08	53.09
P15151	Poliovirus receptor	115	VEDEGNYTC*LFVTFPQGSR	Hex(5)HexNAc(4)Fuc(3)NeuAc(1)	4570.86	4569.86	4	0.9	6.03	299.9	17.76
P15151	Poliovirus receptor	115	VEDEGNYTC*LFVTFPQGSR	Hex(6)HexNAc(5)Fuc(1)NeuAc(3)	5226.07	5225.07	4	2.2	6	260.68	189.26
P16070	CD44 antigen	55	AFNSTLPTMAQMEK	Hex(5)HexNAc(4)Fuc(1)NeuAc(2)	3919.58	3919.58	3	2	3.44	249.07	106.34
P16144	Integrin beta-4	317	HNIIPIFAVTNYSYSYYEK	Hex(5)HexNAc(4)Fuc(1)NeuAc(1)	4381.88	4381.91	3	7.5	8.01	322.36	22.77
P16144	Integrin beta-4	317	HNIIPIFAVTNYSYSYYEK	Hex(5)HexNAc(4)Fuc(3)	4382.9	4382.91	3	2.1	7.05	371.47	42.91
P16144	Integrin beta-4	317	HNIIPIFAVTNYSYSYYEK	Hex(5)HexNAc(6)	4350.88	4349.87	3	-2.3	5.94	207.83	13.31
P16144	Integrin beta-4	671	C*SFRDEDDDC*TYSYTMEGDGAPGPNSTVLVHK	Hex(5)HexNAc(5)Fuc(1)NeuAc(1)	5886.31	5887.36	5	7.9	7.41	243.05	77.87
P16144	Integrin beta-4	671	C*SFRDEDDDC*TYSYTMEGDGAPGPNSTVLVHKK	Hex(6)HexNAc(5)	5739.31	5739.33	5	3.3	5.34	87.46	59.07
P16422	Epithelial cell adhesion molecule	109	QC*NGTSMC*WC*VNTAGVR	Hex(8)HexNAc(2)	3703.4	3703.42	3	5.2	7.66	299.1	210.74
P17301	Integrin alpha-2	95	LNLQTSTSIPNVTEMK	Hex(5)HexNAc(5)NeuAc(1)	3892.68	3892.7	3	5	3.65	126.26	56.88
P17301	Integrin alpha-2	340	YFFNVSDEAALLEK	Hex(5)HexNAc(4)Fuc(1)NeuAc(1)	3705.55	3705.56	3	3.8	2.33	172.77	77.59
P17301	Integrin alpha-2	340	YFFNVSDEAALLEK	Hex(5)HexNAc(4)NeuAc(1)	3559.49	3559.5	3	4.3	6.61	381.56	229.09
P17301	Integrin alpha-2	340	YFFNVSDEAALLEK	Hex(6)HexNAc(5)NeuAc(2)	4215.72	4215.74	3	5.5	2.17	130.41	14.62
P17301	Integrin alpha-2	422	QAFDQILQDRNHSSYLGYSVAAISTGESTHFVAGAPR	Hex(3)HexNAc(6)	5698.58	5698.55	4	-5.5	5.18	113.86	113.86
P17301	Integrin alpha-2	422	QAFDQILQDRNHSSYLGYSVAAISTGESTHFVAGAPR	Hex(7)HexNAc(2)Fuc(1)	5680.53	5679.52	4	-1.9	8.58	321.04	321.04
P17301	Integrin alpha-2	422	QAFDQILQDRNHSSYLGYSVAAISTGESTHFVAGAPR	Hex(8)HexNAc(2)	5696.53	5696.55	5	3.6	9.58	481.62	481.62
P17301	Integrin alpha-2	432	NHSSYLGYSVAAISTGESTHFVAGAPR	Hex(7)HexNAc(2)	4319.87	4319.88	4	2.6	14.77	770.01	717.66
P17301	Integrin alpha-2	432	NHSSYLGYSVAAISTGESTHFVAGAPR	Hex(8)HexNAc(2)	4481.92	4481.95	4	5.6	19.66	1021.06	947.83
P17301	Integrin alpha-2	1052	TASC*SNVTC*WLK	Hex(5)HexNAc(4)Fuc(1)NeuAc(1)	3486.38	3486.4	3	5.5	4.44	187.84	106.05
P17301	Integrin alpha-2	1052	TASC*SNVTC*WLK	Hex(5)HexNAc(4)Fuc(2)NeuAc(1)	3632.44	3632.46	3	5.1	2.92	179.96	50.74
P17936	Insulin-like growth factor-binding protein 3	125	AYLLPAPPAPGNASESEEDRSAGSVESPSVSSTHR	Hex(8)HexNAc(2)	5255.27	5256.3	4	5.5	9.36	371.85	68.26
P18084	Integrin beta-5	576	C*HAGYIGDNC*NC*STDISTC*R	Hex(6)HexNAc(2)	3739.39	3739.4	3	4.5	8.3	365.92	282.18
P18084	Integrin beta-5	576	C*HAGYIGDNC*NC*STDISTC*R	Hex(7)HexNAc(2)Fuc(1)	4047.5	4046.47	3	-4.8	7.41	266.61	219.55
P18084	Integrin beta-5	576	C*HAGYIGDNC*NC*STDISTC*R	Hex(8)HexNAc(2)	4063.49	4063.52	3	5.7	8.2	368.63	313.63
P18084	Integrin beta-5	640	DC*VEC*LLLHSGKPDNQTC*HSLC*R	Hex(5)HexNAc(4)Fuc(1)NeuAc(1)	4858.98	4859.01	4	6	8.73	427.08	65.57
P18084	Integrin beta-5	640	DC*VEC*LLLHSGKPDNQTC*HSLC*R	Hex(8)HexNAc(2)	4501.82	4501.85	4	4.8	11.85	625.75	528.24
P18462	HLA class I histocompatibility antigen, A-25 alpha chain	108	YYNQSEDGSHTIQRMYGC*DVGPDGR	Hex(5)HexNAc(5)NeuAc(1)	5021.98	5020.94	4	-8.1	2.28	81.63	12.4
P18462	HLA class I histocompatibility antigen, A-25 alpha chain	108	YYNQSEDGSHTIQRMYGC*DVGPDGR	Hex(8)HexNAc(2)	4607.81	4608.8	4	-3.2	4.93	171.14	83.36
P18465	HLA class I histocompatibility antigen, B-57 alpha chain	108	YYNQSEAGSHIIQVMYGC*DVGPDGR	Hex(4)HexNAc(5)Fuc(2)NeuAc(1)	5063.06	5062.08	4	5.3	9.35	585.41	328.6
P18465	HLA class I histocompatibility antigen, B-57 alpha chain	108	YYNQSEAGSHIIQVMYGC*DVGPDGR	Hex(5)HexNAc(5)NeuAc(2)	5224.09	5223.11	4	3.2	3.8	112.89	11.25
P20908	Collagen alpha-1(V) chain	1669	VYC*NFTAGGSTC*VFPDKK	Hex(9)HexNAc(2)	3915.57	3915.61	3	9.8	4.5	114.9	80.51
P21860	Receptor tyrosine-protein kinase erbB-3	248	HFNDSGAC*VPR	Hex(7)HexNAc(2)	2800.09	2800.11	3	9.9	5.28	255.16	208.33
P23229	Integrin alpha-6	322	ANHSGAVVLLK	Hex(8)HexNAc(2)	2811.23	2811.24	3	4.8	5.37	223.56	156.77
P23229	Integrin alpha-6	762	QLSC*VANQNGSQADC*ELGNPFKR	Hex(5)HexNAc(4)Fuc(1)	4361.83	4360.83	4	0.7	6.56	317.69	153.08
P23229	Integrin alpha-6	762	QLSC*VANQNGSQADC*ELGNPFKR	Hex(5)HexNAc(4)Fuc(1)NeuAc(1)	4652.92	4652.94	4	4.3	7.11	352.23	50.89
P23229	Integrin alpha-6	762	QLSC*VANQNGSQADC*ELGNPFKR	Hex(7)HexNAc(2)	3622.55	3622.53	3	-4.3	5.43	247.08	126.02
P23229	Integrin alpha-6	961	KYQTLNC*SVNVNC*VNIR	Hex(8)HexNAc(2)	3784.6	3784.64	3	9.9	7.14	316.05	256.63
P26006	Integrin alpha-3	77	ELAVPDGYTNR	Hex(5)HexNAc(4)Fuc(1)NeuAc(2)	3585.44	3585.44	3	1.9	3.05	212	82.48
P26006	Integrin alpha-3	77	ELAVPDGYTNR	Hex(9)HexNAc(2)	3099.24	3099.24	3	0.9	6.23	270.5	225.64
P26006	Integrin alpha-3	77	ELAVPDGYTNR	Hex(10)HexNAc(2)	3261.29	3261.28	3	-4.5	5.77	257.41	206.32
P26006	Integrin alpha-3	106	MNITVK	Hex(6)HexNAc(5)Fuc(1)NeuAc(3)	3712.45	3712.45	3	-1.5	3.08	252.2	50.61
P26006	Integrin alpha-3	106	MNITVK	Hex(9)HexNAc(2)	2570.03	2570.03	2	-0.1	3.38	243.78	50.2
P26006	Integrin alpha-3	265	NITIVTGAPR	Hex(5)HexNAc(3)NeuAc(1)	2752.2	918.071	3	-1.6	5.32	264.17	154
P26006	Integrin alpha-3	265	NITIVTGAPR	Hex(5)HexNAc(4)Fuc(1)NeuAc(1)	3101.34	3101.34	3	0.6	5.65	222.22	93.51
P26006	Integrin alpha-3	265	NITIVTGAPR	Hex(5)HexNAc(4)Fuc(1)NeuAc(2)	3392.44	3392.44	3	0.5	5.82	235.35	141.29
P26006	Integrin alpha-3	265	NITIVTGAPR	Hex(5)HexNAc(4)NeuAc(1)	2955.28	2955.28	3	0	5.78	221.18	113.48
P26006	Integrin alpha-3	265	NITIVTGAPR	Hex(5)HexNAc(4)NeuAc(2)	3246.38	3246.38	3	0.4	5.75	269.95	90.08
P26006	Integrin alpha-3	265	NITIVTGAPR	Hex(6)HexNAc(2)	2420.08	2420.08	3	1.1	5.75	261.01	95.61
P26006	Integrin alpha-3	265	NITIVTGAPR	Hex(6)HexNAc(4)Fuc(1)NeuAc(1)	3263.39	3263.4	3	3.5	5.57	221.08	110.93
P26006	Integrin alpha-3	510	RNITLAYTLEADRDR	Hex(4)HexNAc(5)Fuc(2)	3762.67	3762.69	4	4.8	5.67	393.48	292.53
P26006	Integrin alpha-3	510	RNITLAYTLEADRDR	Hex(5)HexNAc(4)Fuc(1)NeuAc(1)	3866.68	3866.69	4	2.2	6.17	508.29	211.42
P26006	Integrin alpha-3	510	RNITLAYTLEADRDR	Hex(5)HexNAc(4)Fuc(2)	3721.64	3721.66	4	4	5.97	429.53	336.59
P26006	Integrin alpha-3	510	RNITLAYTLEADRDR	Hex(5)HexNAc(4)Fuc(2)NeuAc(1)	4012.74	4011.75	4	4.8	5.73	445.97	20.36
P26006	Integrin alpha-3	510	RNITLAYTLEADRDR	Hex(5)HexNAc(4)NeuAc(2)	4011.72	4012.76	4	9.9	5.84	516.39	48.73
P26006	Integrin alpha-3	590	SLDAYPILNQAQALENHTEVQFQK	Hex(6)HexNAc(2)	4135.86	4135.89	3	6.9	6.97	342.1	259.6
P26006	Integrin alpha-3	590	SLDAYPILNQAQALENHTEVQFQK	Hex(7)HexNAc(2)	4297.91	4297.93	3	5.1	8.66	304.95	300.52
P26006	Integrin alpha-3	590	SLDAYPILNQAQALENHTEVQFQK	Hex(8)HexNAc(2)	4459.97	4459.99	4	5	17.29	934.46	809.33
P26006	Integrin alpha-3	590	SLDAYPILNQAQALENHTEVQFQK	Hex(9)HexNAc(2)	4622.02	4622.03	4	3.6	9.47	555.18	497.27
P26006	Integrin alpha-3	909	AHC*VWLEC*PIPDAPVVTNVTVK	Hex(4)HexNAc(6)	4371.95	4371.92	3	-6.3	4.59	85.68	85.68
P26006	Integrin alpha-3	909	AHC*VWLEC*PIPDAPVVTNVTVK	Hex(5)HexNAc(4)	4127.84	4127.86	3	4	5.91	238.05	167.87
P26006	Integrin alpha-3	909	AHC*VWLEC*PIPDAPVVTNVTVK	Hex(5)HexNAc(7)Fuc(3)	5175.26	5176.23	4	-6.6	2.17	57.94	57.94
P26006	Integrin alpha-3	909	AHC*VWLEC*PIPDAPVVTNVTVK	Hex(6)HexNAc(5)Fuc(1)	4639.03	4639.06	4	4.5	6.88	388.38	210.77
P26006	Integrin alpha-3	909	AHC*VWLEC*PIPDAPVVTNVTVK	Hex(6)HexNAc(5)Fuc(1)NeuAc(1)	4930.13	4930.16	4	5.2	6.76	301.7	51.21
P26006	Integrin alpha-3	909	AHC*VWLEC*PIPDAPVVTNVTVK	Hex(6)HexNAc(5)Fuc(2)	4785.09	4786.13	4	6.7	6.1	276.45	138.86
P26006	Integrin alpha-3	909	AHC*VWLEC*PIPDAPVVTNVTVK	Hex(6)HexNAc(5)Fuc(3)	4931.15	4930.16	4	1.7	4.53	222.24	19.75
P26006	Integrin alpha-3	909	AHC*VWLEC*PIPDAPVVTNVTVK	Hex(6)HexNAc(5)NeuAc(1)	4784.07	4784.09	4	3.6	8.02	436.77	48.37
P26006	Integrin alpha-3	909	AHC*VWLEC*PIPDAPVVTNVTVK	Hex(8)HexNAc(2)	4207.84	4206.87	3	7.2	5.65	249.99	202.07
P26006	Integrin alpha-3	909	AHC*VWLEC*PIPDAPVVTNVTVK	Hex(9)HexNAc(2)	4369.9	4370.91	4	2	4.67	219.78	39.79
P26006	Integrin alpha-3	960	TSIPTINMENK	Hex(6)HexNAc(5)Fuc(1)NeuAc(1)	3672.5	3672.51	3	3.7	3.35	214.61	117.13
P26006	Integrin alpha-3	960	TSIPTINMENK	Hex(7)HexNAc(2)	2788.16	2788.16	3	0.7	5.1	231.36	54.42
P26012	Integrin beta-8	446	NYAIIKPIGFNETAK	Hex(8)HexNAc(2)	3381.5	3381.5	3	0.7	6.96	274.09	168
P28799	Granulins	518	DVEC*GEGHFC*HDNQTC*C*R	Hex(8)HexNAc(2)	3983.41	3983.45	4	9.8	8.86	405.42	405.42
P28799	Granulins	518	DVEC*GEGHFC*HDNQTC*C*R	Hex(9)HexNAc(2)	4145.46	4145.5	4	9.8	10.98	603.71	542.59
P30443	HLA class I histocompatibility antigen, A-1 alpha chain	107	GYYNQSEDGSHTIQIMYGC*DVGPDGR	Hex(4)HexNAc(6)Fuc(1)NeuAc(1)	5223.07	5222.11	4	8.2	2.04	129.56	18.31
P30450	HLA class I histocompatibility antigen, A-26 alpha chain	107	GYYNQSEDGSHTIQR	Hex(10)HexNAc(2)	3781.46	3781.47	3	3.8	7	302.61	274.56
P30450	HLA class I histocompatibility antigen, A-26 alpha chain	107	GYYNQSEDGSHTIQR	Hex(4)HexNAc(5)Fuc(2)NeuAc(1)	4001.59	4001.62	3	5.9	4.4	243.99	27.07
P30450	HLA class I histocompatibility antigen, A-26 alpha chain	107	GYYNQSEDGSHTIQR	Hex(5)HexNAc(4)Fuc(1)NeuAc(2)	4105.6	4105.61	3	2.7	6.71	324.79	43.71
P30450	HLA class I histocompatibility antigen, A-26 alpha chain	107	GYYNQSEDGSHTIQR	Hex(8)HexNAc(2)	3457.35	3457.36	3	2.7	6.85	275.88	229.03
P30450	HLA class I histocompatibility antigen, A-26 alpha chain	107	GYYNQSEDGSHTIQR	Hex(9)HexNAc(2)	3619.41	3619.42	3	3	5.37	208.5	134.42
P30457	HLA class I histocompatibility antigen, A-66 alpha chain	107	GYYNQSEDGSHTIQR	Hex(8)HexNAc(2)	3457.35	3457.37	3	3.4	7.73	433.5	379.76
P30459	HLA class I histocompatibility antigen, A-74 alpha chain	107	GYYNQSEAGSHTIQMMYGC*DVGPDGR	Hex(3)HexNAc(7)Fuc(1)	4946.97	4946.98	5	2.5	2.07	77.91	24.55
P30459	HLA class I histocompatibility antigen, A-74 alpha chain	107	GYYNQSEAGSHTIQMMYGC*DVGPDGR	Hex(5)HexNAc(5)NeuAc(1)	5009.95	5009	4	9	2.23	33.7	11.72
P30459	HLA class I histocompatibility antigen, A-74 alpha chain	107	GYYNQSEAGSHTIQMMYGC*DVGPDGR	Hex(10)HexNAc(2)	4919.88	4919.9	4	3.1	3.85	191.71	18.82
P30462	HLA class I histocompatibility antigen, B-14 alpha chain	107	GYYNQSEAGSHTLQWMYGC*DVGPDGR	Hex(3)HexNAc(6)Fuc(2)	4944.99	4945.99	5	-0.9	3.83	137.68	44.34
P30462	HLA class I histocompatibility antigen, B-14 alpha chain	107	GYYNQSEAGSHTLQWMYGC*DVGPDGR	Hex(4)HexNAc(6)	4814.92	4814.88	5	-9	2.21	210.23	33.5
P30462	HLA class I histocompatibility antigen, B-14 alpha chain	107	GYYNQSEAGSHTLQWMYGC*DVGPDGR	Hex(5)HexNAc(4)NeuAc(2)	5153.01	5152.05	4	8.7	4.91	279.71	13.34
P30462	HLA class I histocompatibility antigen, B-14 alpha chain	107	GYYNQSEAGSHTLQWMYGC*DVGPDGR	Hex(6)HexNAc(4)NeuAc(2)	5315.06	5314.1	4	7.7	3.75	140.89	37.02
P30462	HLA class I histocompatibility antigen, B-14 alpha chain	108	YYNQSEAGSHTLQWMYGC*DVGPDGR	Hex(4)HexNAc(5)Fuc(3)	4975.05	4976.06	4	-0.3	4.14	156.64	48.22
P30462	HLA class I histocompatibility antigen, B-14 alpha chain	108	YYNQSEAGSHTLQWMYGC*DVGPDGR	Hex(8)HexNAc(2)	4575.85	4575.87	4	2.4	7.62	280.07	148.59
P30462	HLA class I histocompatibility antigen, B-14 alpha chain	108	YYNQSEAGSHTLQWMYGC*DVGPDGR	Hex(9)HexNAc(2)	4737.91	4737.92	4	3.5	5.98	199.56	123
P30479	HLA class I histocompatibility antigen, B-41 alpha chain	107	GYYNQSEAGSHTWQRMYGC*DVGPDGR	Hex(6)HexNAc(4)Fuc(1)	4921.95	4921.9	4	-9.9	4.36	203.8	162.62
P30479	HLA class I histocompatibility antigen, B-41 alpha chain	107	GYYNQSEAGSHTWQRMYGC*DVGPDGR	Hex(7)HexNAc(5)	5141.02	5140.03	4	3	4.42	146.43	120.17
P30481	HLA class I histocompatibility antigen, B-44 alpha chain	108	YYNQSEAGSHIIQRMYGC*DVGPDGR	Hex(8)HexNAc(2)	4575.85	4575.87	4	2.4	2.64	179.13	102.4
P30498	HLA class I histocompatibility antigen, B-78 alpha chain	107	GYYNQSEAGSHTWQTMYGC*DVGPDGR	Hex(4)HexNAc(7)NeuAc(1)	5297.06	5298.09	4	4.9	2.92	74.45	15.32
P30498	HLA class I histocompatibility antigen, B-78 alpha chain	107	GYYNQSEAGSHTWQTMYGC*DVGPDGR	Hex(5)HexNAc(4)Fuc(2)NeuAc(1)	5141.99	5141.03	4	8.7	2.91	144.12	22.99
P30498	HLA class I histocompatibility antigen, B-78 alpha chain	107	GYYNQSEAGSHTWQTMYGC*DVGPDGR	Hex(5)HexNAc(6)NeuAc(1)	5256.04	5257.06	4	4.9	3.8	156.78	41.28
P30504	HLA class I histocompatibility antigen, Cw-4 alpha chain	107	GYYNQSEDGSHTLQR	Hex(4)HexNAc(5)Fuc(2)NeuAc(1)	4001.59	4001.62	3	5.9	4.4	243.99	27.07
P30504	HLA class I histocompatibility antigen, Cw-4 alpha chain	107	GYYNQSEDGSHTLQR	Hex(5)HexNAc(4)Fuc(1)NeuAc(2)	4105.6	4105.61	3	2.7	6.71	324.79	43.71
P30504	HLA class I histocompatibility antigen, Cw-4 alpha chain	107	GYYNQSEDGSHTLQR	Hex(8)HexNAc(2)	3457.35	3457.36	3	2.7	6.85	275.88	229.03
P30504	HLA class I histocompatibility antigen, Cw-4 alpha chain	107	GYYNQSEDGSHTLQR	Hex(9)HexNAc(2)	3619.41	3619.42	3	3	5.37	208.5	134.42
P30504	HLA class I histocompatibility antigen, Cw-4 alpha chain	107	GYYNQSEDGSHTLQR	Hex(10)HexNAc(2)	3781.46	3781.47	3	2.2	12.98	727.89	536.12
P30511	HLA class I histocompatibility antigen, alpha chain	106	YNQSEAGSHTLQGMNGC*DMGPDGR	Hex(9)HexNAc(2)	4446.68	4446.68	3	-0.7	7.35	264.01	118.76
P32004	Neural cell adhesion molecule L1	242	LLFPTNSSSHLVALQGQPLVLEC*IAEGFPTPTIK	Hex(5)HexNAc(4)Fuc(2)NeuAc(1)	5883.75	5883.78	4	4.6	7.64	288.78	46.4
P32004	Neural cell adhesion molecule L1	428	ILTADNQTYMAVQGSTAYLLC*K	Hex(7)HexNAc(7)NeuAc(4)	6181.52	6180.56	4	7.5	4.22	82.17	82.17
P32004	Neural cell adhesion molecule L1	668	VPGNQTSTTLK	Hex(5)HexNAc(4)Fuc(1)NeuAc(1)	3205.35	3205.38	3	8	2.28	175.2	80.61
P32004	Neural cell adhesion molecule L1	668	VPGNQTSTTLK	Hex(5)HexNAc(4)Fuc(2)NeuAc(1)	3351.41	3351.42	3	3.4	2.33	138.55	57.63
P32004	Neural cell adhesion molecule L1	668	VPGNQTSTTLK	Hex(5)HexNAc(4)Fuc(3)	3206.37	3206.38	3	2.8	2.33	107.45	57.22
P32004	Neural cell adhesion molecule L1	977	THNLTDLSPHLR	Hex(4)HexNAc(4)Fuc(2)	3156.38	3156.4	4	3.9	6.22	402.93	256.14
P32004	Neural cell adhesion molecule L1	977	THNLTDLSPHLR	Hex(4)HexNAc(5)Fuc(1)	3213.41	3213.42	4	3.9	5.41	340.93	201.54
P32004	Neural cell adhesion molecule L1	977	THNLTDLSPHLR	Hex(4)HexNAc(5)Fuc(1)NeuAc(1)	3504.5	3504.51	4	3.7	6.22	435.55	267.78
P32004	Neural cell adhesion molecule L1	977	THNLTDLSPHLR	Hex(4)HexNAc(5)Fuc(3)	3505.52	3505.53	4	2.7	6.22	407.53	264.25
P32004	Neural cell adhesion molecule L1	977	THNLTDLSPHLR	Hex(5)HexNAc(4)Fuc(1)NeuAc(1)	3463.47	3463.49	4	4.4	6.22	381.75	218.88
P32004	Neural cell adhesion molecule L1	977	THNLTDLSPHLR	Hex(5)HexNAc(4)Fuc(2)	3318.44	3318.45	4	4.3	6.29	431.41	310.86
P32004	Neural cell adhesion molecule L1	977	THNLTDLSPHLR	Hex(5)HexNAc(4)Fuc(2)NeuAc(1)	3609.53	903.139	4	0.1	5.16	252.66	99.11
P32004	Neural cell adhesion molecule L1	977	THNLTDLSPHLR	Hex(5)HexNAc(4)Fuc(3)	3464.49	3464.51	4	5.2	4.1	239	137.68
P32004	Neural cell adhesion molecule L1	977	THNLTDLSPHLR	Hex(5)HexNAc(5)Fuc(1)NeuAc(1)	3666.55	3666.58	4	7.9	5.59	285.06	146.26
P32004	Neural cell adhesion molecule L1	977	THNLTDLSPHLR	Hex(5)HexNAc(5)Fuc(3)	3667.57	3667.6	4	7.7	6.03	318.78	210.81
P32004	Neural cell adhesion molecule L1	977	THNLTDLSPHLR	Hex(5)HexNAc(6)Fuc(4)	4016.71	4016.73	4	5.8	4.94	282.58	45.79
P32004	Neural cell adhesion molecule L1	977	THNLTDLSPHLR	Hex(6)HexNAc(5)Fuc(3)NeuAc(1)	4120.72	4121.75	4	5.6	5.68	279.5	130.82
P32004	Neural cell adhesion molecule L1	977	THNLTDLSPHLR	Hex(6)HexNAc(5)Fuc(4)	3975.68	3975.71	4	5.7	5.88	376	238.97
P32004	Neural cell adhesion molecule L1	977	THNLTDLSPHLR	Hex(6)HexNAc(6)Fuc(4)	4178.76	4178.79	4	5.5	5.95	311.64	29.09
P32004	Neural cell adhesion molecule L1	977	THNLTDLSPHLR	Hex(9)HexNAc(2)	3268.37	3268.38	4	3.3	8.35	543.54	403.3
P35613	Basigin	153	ILLTC*SLNDSATEVTGHR	Hex(5)HexNAc(4)Fuc(2)NeuAc(1)	4192.78	4192.81	3	6.7	2.24	121.92	62.86
P35613	Basigin	258	ITDSEDKALMNGSESR	Hex(6)HexNAc(2)	3131.28	3131.3	3	5.9	4.61	125.49	63.91
P35613	Basigin	258	ITDSEDKALMNGSESR	Hex(8)HexNAc(2)	3455.39	3455.4	3	4.6	5.14	165.57	111.08
P36941	Tumor necrosis factor receptor superfamily member 3	172	AGHFQNTSSPSAR	Hex(5)HexNAc(4)Fuc(1)NeuAc(2)	3710.47	3710.5	3	8.2	4.89	178.48	74.14
P36941	Tumor necrosis factor receptor superfamily member 3	172	AGHFQNTSSPSAR	Hex(9)HexNAc(2)	3224.27	3224.29	3	3.9	3.31	278.4	93.69
P42261	Glutamate receptor 1	388	FVPAATDAQAGGDNSSVQNR	Hex(3)HexNAc(7)Fuc(1)	4058.71	4058.69	4	-4	3.4	318.96	13.25
P42892	Endothelin-converting enzyme 1	162	HLLENSTASVSEAER	Hex(5)HexNAc(4)Fuc(1)	3411.44	3411.45	3	1	6.41	310.85	204.38
P42892	Endothelin-converting enzyme 1	162	HLLENSTASVSEAERK	Hex(5)HexNAc(4)Fuc(1)NeuAc(1)	3830.63	3830.67	4	8.6	6.34	308.49	133.99
P42892	Endothelin-converting enzyme 1	162	HLLENSTASVSEAERK	Hex(5)HexNAc(4)Fuc(2)NeuAc(1)	3976.69	3976.72	4	6.7	6.19	261.69	139.52
P42892	Endothelin-converting enzyme 1	162	HLLENSTASVSEAER	Hex(6)HexNAc(2)	3021.28	3021.28	3	1.6	6.92	418.86	283.72
P42892	Endothelin-converting enzyme 1	162	HLLENSTASVSEAER	Hex(7)HexNAc(2)	3183.33	3183.34	3	4	7.18	400.91	328.04
P42892	Endothelin-converting enzyme 1	162	HLLENSTASVSEAER	Hex(8)HexNAc(2)	3345.38	3345.4	3	5.7	7.08	413.65	329.98
P42892	Endothelin-converting enzyme 1	162	HLLENSTASVSEAER	Hex(9)HexNAc(2)	3507.44	3507.47	3	9.2	6.83	397.46	313.37
P42892	Endothelin-converting enzyme 1	162	HLLENSTASVSEAER	Hex(10)HexNAc(2)	3669.49	3669.52	3	7.1	6.89	314.14	224.4
P42892	Endothelin-converting enzyme 1	206	LGGWNITGPWAK	Hex(6)HexNAc(5)NeuAc(3)	4160.68	4160.7	3	3.4	2.25	112.25	25.88
P48509	CD151 antigen	134	YHQPGHEAVTSAVDQLQQEFHC*C*GSNNSQDWR	Hex(4)HexNAc(4)Fuc(2)NeuAc(1)	5829.36	5829.39	5	4.8	6.63	222.01	172.71
P48509	CD151 antigen	134	YHQPGHEAVTSAVDQLQQEFHC*C*GSNNSQDWR	Hex(5)HexNAc(4)Fuc(1)	5554.26	5554.3	5	6.8	8.44	389.39	355.37
P48509	CD151 antigen	134	YHQPGHEAVTSAVDQLQQEFHC*C*GSNNSQDWR	Hex(5)HexNAc(4)Fuc(1)NeuAc(1)	5845.36	5845.37	4	3	9.28	311.75	55.69
P48509	CD151 antigen	134	YHQPGHEAVTSAVDQLQQEFHC*C*GSNNSQDWR	Hex(5)HexNAc(4)Fuc(2)	5700.32	5700.34	5	3.6	10.28	465.8	27.94
P48509	CD151 antigen	134	YHQPGHEAVTSAVDQLQQEFHC*C*GSNNSQDWR	Hex(5)HexNAc(4)Fuc(3)	5846.38	5845.37	4	0.1	6.65	250.86	33.67
P48509	CD151 antigen	134	YHQPGHEAVTSAVDQLQQEFHC*C*GSNNSQDWR	Hex(5)HexNAc(4)NeuAc(1)	5699.3	5699.32	4	4	9.05	249.98	52.72
P48509	CD151 antigen	134	YHQPGHEAVTSAVDQLQQEFHC*C*GSNNSQDWR	Hex(5)HexNAc(4)NeuAc(2)	5990.39	5990.4	5	0.8	6.03	211.31	35.13
P48509	CD151 antigen	134	YHQPGHEAVTSAVDQLQQEFHC*C*GSNNSQDWR	Hex(5)HexNAc(5)Fuc(1)NeuAc(2)	6339.53	6338.55	5	3.7	9.67	405.93	361.54
P48509	CD151 antigen	134	YHQPGHEAVTSAVDQLQQEFHC*C*GSNNSQDWR	Hex(5)HexNAc(5)Fuc(2)NeuAc(2)	6485.59	6485.62	5	4.8	9.02	429.52	22.38
P48509	CD151 antigen	134	YHQPGHEAVTSAVDQLQQEFHC*C*GSNNSQDWR	Hex(5)HexNAc(5)Fuc(4)NeuAc(1)	6486.61	6485.62	5	2.2	7.6	252.7	12.2
P48509	CD151 antigen	134	YHQPGHEAVTSAVDQLQQEFHC*C*GSNNSQDWR	Hex(6)HexNAc(2)	5164.1	5163.12	4	4.9	5.45	114.13	49.34
P48509	CD151 antigen	134	YHQPGHEAVTSAVDQLQQEFHC*C*GSNNSQDWRDSEWIR	Hex(6)HexNAc(4)	6356.62	6357.57	5	-8.3	5.01	187.19	178.3
P48509	CD151 antigen	134	YHQPGHEAVTSAVDQLQQEFHC*C*GSNNSQDWR	Hex(6)HexNAc(5)Fuc(1)NeuAc(1)	6210.49	6209.5	5	3	12.39	613.44	548.01
P48509	CD151 antigen	134	YHQPGHEAVTSAVDQLQQEFHC*C*GSNNSQDWR	Hex(6)HexNAc(5)Fuc(1)NeuAc(2)	6501.58	6500.61	5	4.5	10.57	553.59	490.84
P48509	CD151 antigen	134	YHQPGHEAVTSAVDQLQQEFHC*C*GSNNSQDWR	Hex(6)HexNAc(5)Fuc(2)NeuAc(1)	6356.55	6355.58	5	6.1	9.08	486.62	21.69
P48509	CD151 antigen	134	YHQPGHEAVTSAVDQLQQEFHC*C*GSNNSQDWR	Hex(6)HexNAc(5)Fuc(2)NeuAc(2)	6647.64	6648.67	5	3.2	7.77	311.43	28.64
P48509	CD151 antigen	134	YHQPGHEAVTSAVDQLQQEFHC*C*GSNNSQDWR	Hex(6)HexNAc(5)Fuc(3)NeuAc(1)	6502.6	6502.66	5	8.3	5.97	234.41	234.41
P48509	CD151 antigen	134	YHQPGHEAVTSAVDQLQQEFHC*C*GSNNSQDWR	Hex(6)HexNAc(5)NeuAc(3)	6646.62	6645.64	5	2.8	6.21	218.72	171.81
P48509	CD151 antigen	134	YHQPGHEAVTSAVDQLQQEFHC*C*GSNNSQDWR	Hex(7)HexNAc(2)	5326.15	5326.17	5	4.4	8.64	380.65	349.13
P48509	CD151 antigen	134	YHQPGHEAVTSAVDQLQQEFHC*C*GSNNSQDWR	Hex(7)HexNAc(7)Fuc(1)	6487.6	6486.59	5	-1	6.68	256.83	38.81
P48960	CD97 antigen	29	WC*PQNSSC*VNATAC*R	Hex(6)HexNAc(5)Fuc(3)NeuAc(1)	4527.72	4528.76	5	7.5	5.1	307.91	32.43
P48960	CD97 antigen	105	TFKNESENTC*QDVDEC*QQNPR	Hex(5)HexNAc(4)Fuc(1)NeuAc(2)	4949.91	4949.93	4	3.9	7.65	364.91	91.19
P48960	CD97 antigen	442	LSAVNSIFLSHNNTK	Hex(5)HexNAc(4)Fuc(2)NeuAc(1)	3850.66	3850.69	3	7.7	2.74	161.24	107.51
P53801	Pituitary tumor-transforming gene 1 protein-interacting protein	47	TC*EEC*LKNVSC*LWC*NTNK	Hex(6)HexNAc(2)	3694.46	3694.48	3	5.1	7.41	392.32	356.55
P53801	Pituitary tumor-transforming gene 1 protein-interacting protein	47	TC*EEC*LKNVSC*LWC*NTNK	Hex(7)HexNAc(2)	3856.52	3856.53	3	3.9	6.39	221.85	146.47
P53801	Pituitary tumor-transforming gene 1 protein-interacting protein	47	TC*EEC*LKNVSC*LWC*NTNK	Hex(8)HexNAc(2)	4018.57	4018.59	3	5.8	6.29	216.01	156.47
P53801	Pituitary tumor-transforming gene 1 protein-interacting protein	54	NVSC*LWC*NTNK	Hex(7)HexNAc(2)	2936.14	2936.15	3	0.9	5.92	273.75	158.25
P54709	Sodium/potassium-transporting ATPase subunit beta-3	112	KFLKPYTLEEQKNLTVC*PDGALFEQK	Hex(5)HexNAc(4)NeuAc(2)	5301.38	5301.36	4	-4	4.14	79.41	38.01
P54709	Sodium/potassium-transporting ATPase subunit beta-3	113	FLKPYTLEEQKNLTVC*PDGALFEQK	Hex(5)HexNAc(4)Fuc(1)NeuAc(1)	5028.25	5028.28	4	6.5	12.55	683.38	163.31
P54709	Sodium/potassium-transporting ATPase subunit beta-3	113	FLKPYTLEEQKNLTVC*PDGALFEQK	Hex(5)HexNAc(4)Fuc(1)NeuAc(2)	5319.34	5320.39	4	7.8	9.56	505.51	43.65
P54709	Sodium/potassium-transporting ATPase subunit beta-3	113	FLKPYTLEEQKNLTVC*PDGALFEQK	Hex(5)HexNAc(4)Fuc(2)	4883.21	4884.26	4	9.3	8.67	499.34	499.34
P54709	Sodium/potassium-transporting ATPase subunit beta-3	113	FLKPYTLEEQKNLTVC*PDGALFEQK	Hex(5)HexNAc(4)Fuc(2)NeuAc(1)	5174.31	5174.33	4	4	10.66	578.92	32.3
P54709	Sodium/potassium-transporting ATPase subunit beta-3	113	FLKPYTLEEQKNLTVC*PDGALFEQK	Hex(5)HexNAc(4)Fuc(3)	5029.27	5028.27	4	0.9	7.35	362.08	32.64
P54709	Sodium/potassium-transporting ATPase subunit beta-3	113	FLKPYTLEEQKNLTVC*PDGALFEQK	Hex(5)HexNAc(4)Fuc(3)NeuAc(1)	5320.36	5319.38	4	4.2	9.75	408.42	52.79
P54709	Sodium/potassium-transporting ATPase subunit beta-3	113	FLKPYTLEEQKNLTVC*PDGALFEQK	Hex(5)HexNAc(5)Fuc(1)NeuAc(1)	5231.33	5230.34	4	3	5.84	170.6	154.97
P54709	Sodium/potassium-transporting ATPase subunit beta-3	113	FLKPYTLEEQKNLTVC*PDGALFEQK	Hex(5)HexNAc(5)Fuc(2)NeuAc(2)	5668.48	5667.46	4	-3.8	5.53	193.1	193.1
P54709	Sodium/potassium-transporting ATPase subunit beta-3	113	FLKPYTLEEQKNLTVC*PDGALFEQK	Hex(5)HexNAc(5)NeuAc(1)	5085.27	5085.29	4	4.6	5.74	132.28	102
P54709	Sodium/potassium-transporting ATPase subunit beta-3	113	FLKPYTLEEQKNLTVC*PDGALFEQK	Hex(5)HexNAc(5)NeuAc(2)	5376.36	5376.4	4	6.1	4.56	75.83	23.52
P54709	Sodium/potassium-transporting ATPase subunit beta-3	113	FLKPYTLEEQKNLTVC*PDGALFEQK	Hex(6)HexNAc(4)Fuc(1)NeuAc(1)	5190.3	5189.34	4	7.8	5.29	239.44	239.44
P54709	Sodium/potassium-transporting ATPase subunit beta-3	113	FLKPYTLEEQKNLTVC*PDGALFEQK	Hex(6)HexNAc(4)Fuc(3)	5191.32	5190.35	5	5.8	7.52	432.82	56.1
P54709	Sodium/potassium-transporting ATPase subunit beta-3	113	FLKPYTLEEQKNLTVC*PDGALFEQK	Hex(6)HexNAc(5)Fuc(1)NeuAc(1)	5393.38	5392.42	4	7.4	7.88	343.92	323.97
P54709	Sodium/potassium-transporting ATPase subunit beta-3	113	FLKPYTLEEQKNLTVC*PDGALFEQK	Hex(6)HexNAc(5)Fuc(1)NeuAc(2)	5684.48	5685.51	4	4.9	6.18	217.37	12.96
P54709	Sodium/potassium-transporting ATPase subunit beta-3	113	FLKPYTLEEQKNLTVC*PDGALFEQK	Hex(6)HexNAc(5)Fuc(2)	5248.34	5249.36	4	2.6	7.69	285.47	285.47
P54709	Sodium/potassium-transporting ATPase subunit beta-3	113	FLKPYTLEEQKNLTVC*PDGALFEQK	Hex(6)HexNAc(5)Fuc(3)	5394.4	5395.43	4	5.1	7.58	250.12	250.12
P54709	Sodium/potassium-transporting ATPase subunit beta-3	113	FLKPYTLEEQKNLTVC*PDGALFEQK	Hex(6)HexNAc(5)Fuc(3)NeuAc(1)	5685.5	5686.51	4	2.5	6.1	168.79	168.79
P54709	Sodium/potassium-transporting ATPase subunit beta-3	113	FLKPYTLEEQKNLTVC*PDGALFEQK	Hex(6)HexNAc(5)Fuc(4)	5540.46	5541.46	4	-0.7	5.52	162.14	162.14
P54709	Sodium/potassium-transporting ATPase subunit beta-3	113	FLKPYTLEEQKNLTVC*PDGALFEQK	Hex(7)HexNAc(6)Fuc(1)NeuAc(1)	5758.51	5757.55	4	7.1	7.66	258.06	249.19
P54709	Sodium/potassium-transporting ATPase subunit beta-3	113	FLKPYTLEEQKNLTVC*PDGALFEQK	Hex(7)HexNAc(6)Fuc(3)NeuAc(1)	6050.63	6051.65	4	2.4	8.34	264.28	38.95
P54709	Sodium/potassium-transporting ATPase subunit beta-3	113	FLKPYTLEEQKNLTVC*PDGALFEQK	Hex(7)HexNAc(6)Fuc(4)	5905.59	5905.6	4	1	6.17	233.27	15.26
P54709	Sodium/potassium-transporting ATPase subunit beta-3	113	FLKPYTLEEQKNLTVC*PDGALFEQK	Hex(7)HexNAc(6)Fuc(5)	6051.65	6051.65	4	-0.4	4.17	217.3	31.05
P54709	Sodium/potassium-transporting ATPase subunit beta-3	113	FLKPYTLEEQKNLTVC*PDGALFEQK	Hex(7)HexNAc(6)NeuAc(2)	5903.55	5903.56	4	2.2	7.82	315.13	12.33
P54709	Sodium/potassium-transporting ATPase subunit beta-3	113	FLKPYTLEEQKNLTVC*PDGALFEQK	Hex(8)HexNAc(2)	4671.09	4671.12	4	6.4	14.55	758.43	747.4
P55899	IgG receptor FcRn large subunit p51	109	GPYTLQGLLGC*ELGPDNTSVPTAK	Hex(4)HexNAc(5)Fuc(2)NeuAc(1)	4735.06	4735.08	4	5.1	5.2	210.68	18.33
P55899	IgG receptor FcRn large subunit p51	109	GPYTLQGLLGC*ELGPDNTSVPTAK	Hex(4)HexNAc(5)Fuc(3)NeuAc(1)	4881.12	4880.11	4	-0.8	3.99	135.57	110.14
P55899	IgG receptor FcRn large subunit p51	109	GPYTLQGLLGC*ELGPDNTSVPTAK	Hex(4)HexNAc(5)Fuc(4)	4736.08	4735.08	4	1.5	2.71	166.3	22.61
P56199	Integrin alpha-1	418	NTTFNVESTKK	Hex(8)HexNAc(2)	2971.23	2971.25	3	5.5	2.97	83.57	47.7
P56199	Integrin alpha-1	459	YNHTGQVIIYR	Hex(9)HexNAc(2)	3228.35	3228.35	3	2	6.19	408.74	194.71
P56199	Integrin alpha-1	1111	SENASLVLSSSNQK	Hex(8)HexNAc(2)	3166.32	3166.33	3	5.4	8.34	464.42	409.89
P61812	Transforming growth factor beta-2	222	ISLHC*PC*C*TFVPSNNYIIPNKSEELEAR	Hex(8)HexNAc(2)	5051.16	5050.17	4	2.7	7.96	339.76	294.26
P78357	Contactin-associated protein 1	1122	YQLGTSPYVYQLTTRPVTDGQPHSINITR	Hex(9)HexNAc(2)	5170.33	5171.33	4	-0.6	8.46	420.41	169.77
P78410	Butyrophilin subfamily 3 member A2	113	IHNVTASDSGK	Hex(8)HexNAc(2)	2831.15	2831.15	3	1	6.7	288.88	228.18
P78536	Disintegrin and metalloproteinase domain-containing protein 17	96	VVVVDGKNESEYTVK	Hex(8)HexNAc(2)	3368.45	3368.47	3	6.8	4.31	210.42	210.42
P78536	Disintegrin and metalloproteinase domain-containing protein 17	169	SEDIKNVSR	Hex(8)HexNAc(2)	2750.12	2750.13	3	1.5	4.86	227.19	56.74
P78536	Disintegrin and metalloproteinase domain-containing protein 17	534	C*#QEAINATC*K	Hex(8)HexNAc(2)	2880.08	2880.08	2	1.5	6.64	303.88	233.54
P78536	Disintegrin and metalloproteinase domain-containing protein 17	585	EQQLESC*AC*NETDNSC*K	Hex(7)HexNAc(2)	3613.32	3613.35	3	8.4	5.66	252.28	153.89
P78536	Disintegrin and metalloproteinase domain-containing protein 17	585	EQQLESC*AC*NETDNSC*K	Hex(8)HexNAc(2)	3775.38	3775.4	3	5.1	12.35	726.36	605.48
Q06481	Amyloid-like protein 2	540	RNQSLSLLYK	Hex(9)HexNAc(2)	3086.33	3086.34	3	4.5	2.08	207.54	125.03
Q07954	Prolow-density lipoprotein receptor-related protein 1	713	LYWVDAFYDRIETILLNGTDR	Hex(8)HexNAc(2)	4275.88	4275.91	3	5.3	2.26	19.36	13.61
Q07954	Prolow-density lipoprotein receptor-related protein 1	1507	WTGHNVTVVQR	Hex(9)HexNAc(2)	3161.31	3161.34	3	7.8	4.44	168.41	124.56
Q07954	Prolow-density lipoprotein receptor-related protein 1	4074	LNGTDPIVAADSKR	Hex(6)HexNAc(2)	2835.25	2835.27	3	6.3	6.03	305.07	247.17
Q07954	Prolow-density lipoprotein receptor-related protein 1	4074	LNGTDPIVAADSKR	Hex(8)HexNAc(2)	3159.36	3159.38	3	6.5	4.15	205.46	131.73
Q07954	Prolow-density lipoprotein receptor-related protein 1	4074	LNGTDPIVAADSKR	Hex(9)HexNAc(2)	3321.41	3321.43	3	7.4	2.97	107.32	69.07
Q08380	Galectin-3-binding protein	64	ALGFENATQALGR	Hex(8)HexNAc(2)	3050.28	3050.28	3	-0.1	5.92	264.75	140.43
Q08380	Galectin-3-binding protein	64	ALGFENATQALGR	Hex(9)HexNAc(2)	3212.34	3212.34	3	1.4	6	269.12	102.98
Q08380	Galectin-3-binding protein	118	DAGVVC*TNETR	Hex(6)HexNAc(2)	2600.03	2600.05	2	7.3	5.22	251.37	132.77
Q08380	Galectin-3-binding protein	118	DAGVVC*TNETR	Hex(7)HexNAc(2)	2762.08	2762.1	2	5.5	3.78	245.46	37.15
Q08380	Galectin-3-binding protein	118	DAGVVC*TNETR	Hex(8)HexNAc(2)	2924.13	2924.15	2	5.4	3.05	214.82	94.29
Q08380	Galectin-3-binding protein	118	DAGVVC*TNETR	Hex(9)HexNAc(2)	3086.19	3086.2	3	4.1	6.17	265.45	158.04
Q08380	Galectin-3-binding protein	396	GLNLTEDTYKPR	Hex(8)HexNAc(2)	3109.31	3109.31	3	1.3	5.86	274.44	71.56
Q08380	Galectin-3-binding protein	396	GLNLTEDTYKPR	Hex(9)HexNAc(2)	3271.36	3271.38	3	4.3	6.09	270.32	210.36
Q08380	Galectin-3-binding protein	396	GLNLTEDTYKPR	Hex(10)HexNAc(2)	3433.41	3433.42	3	1.5	6.34	363.41	121.38
Q08380	Galectin-3-binding protein	542	AAIPSALDTNSSK	Hex(7)HexNAc(2)	2815.19	2815.19	2	0.8	3.26	204.65	78.58
Q08380	Galectin-3-binding protein	542	AAIPSALDTNSSK	Hex(8)HexNAc(2)	2977.24	2977.25	3	4.3	5.61	278.15	212.58
Q08380	Galectin-3-binding protein	542	AAIPSALDTNSSK	Hex(9)HexNAc(2)	3139.29	3139.3	3	0.9	6.35	302.02	191.22
Q08380	Galectin-3-binding protein	542	AAIPSALDTNSSK	Hex(10)HexNAc(2)	3301.35	3301.37	3	6.8	6.08	241.26	166.34
Q08380	Galectin-3-binding protein	571	TVIRPFYLTNSSGVD	Hex(9)HexNAc(2)	3533.49	3533.49	3	0.2	6.29	237.89	133.48
Q08722	Leukocyte surface antigen CD47	62	GRDIYTFDGALNK	Hex(7)HexNAc(2)	3010.27	1004.09	3	0.3	6.95	568.81	280.01
Q08722	Leukocyte surface antigen CD47	62	GRDIYTFDGALNK	Hex(8)HexNAc(2)	3172.32	1058.11	3	0.5	4.88	277.92	101.01
Q08722	Leukocyte surface antigen CD47	64	DIYTFDGALNK	Hex(6)HexNAc(3)Fuc(1)	2984.23	995.415	3	0.7	6.24	371.59	213.89
Q08722	Leukocyte surface antigen CD47	64	DIYTFDGALNK	Hex(7)HexNAc(2)	2797.14	1399.08	2	0.9	11.85	663.82	480.61
Q08722	Leukocyte surface antigen CD47	64	DIYTFDGALNK	Hex(8)HexNAc(2)	2959.2	1480.11	2	2.9	6.35	418.76	241.73
Q10589	Bone marrow stromal antigen 2	65	NVTHLLQQELTEAQK	Hex(8)HexNAc(2)	3454.51	3454.52	3	3.3	4.11	230.48	176.26
Q10589	Bone marrow stromal antigen 2	65	NVTHLLQQELTEAQK	Hex(9)HexNAc(2)	3616.56	3616.58	3	5.5	4.02	180.59	127.44
Q12907	Vesicular integral-membrane protein	173	VFPYISVMVNNGSLSYDHSK	Hex(3)HexNAc(5)	3758.65	3758.67	4	4.5	8.05	499.77	430.83
Q12907	Vesicular integral-membrane protein	173	VFPYISVMVNNGSLSYDHSK	Hex(4)HexNAc(5)Fuc(1)	4066.76	4066.78	4	5	5.73	397.1	339.17
Q12907	Vesicular integral-membrane protein	173	VFPYISVMVNNGSLSYDHSK	Hex(5)HexNAc(5)NeuAc(1)	4373.85	4374.89	4	7.4	5.18	263.96	27.28
Q12907	Vesicular integral-membrane protein	173	VFPYISVMVNNGSLSYDHSK	Hex(3)HexNAc(6)	3961.73	3961.75	4	5.3	4.78	257.47	224.4
Q12907	Vesicular integral-membrane protein	173	VFPYISVMVNNGSLSYDHSK	Hex(5)HexNAc(5)Fuc(2)	4374.87	4374.88	4	1.4	5.31	250.49	40.76
Q12907	Vesicular integral-membrane protein	173	VFPYISVMVNNGSLSYDHSK	Hex(5)HexNAc(5)Fuc(1)	4228.81	4228.83	4	3.3	3.19	213.76	176.01
Q13308	Inactive tyrosine-protein kinase 7	165	DGTPLSDGQSNHTVSSK	Hex(9)HexNAc(2)	3594.43	3594.46	3	6.3	5.15	130.22	89.35
Q13308	Inactive tyrosine-protein kinase 7	641	MHIFQNGSLVIHDVAPEDSGR	Hex(6)HexNAc(2)	3700.61	3700.64	4	9.8	4.39	247.35	91.39
Q13443	Disintegrin and metalloproteinase domain-containing protein 9	381	NFSSC*SAEDFEK	Hex(8)HexNAc(2)	3123.15	3123.15	3	1.1	6.76	374.12	329.25
Q13641	Trophoblast glycoprotein	272	VLHNGTLAELQGLPHIR	Hex(5)HexNAc(5)Fuc(2)NeuAc(2)	4568.02	4567.05	4	6.9	5.63	216.38	141.64
Q13641	Trophoblast glycoprotein	272	VLHNGTLAELQGLPHIR	Hex(6)HexNAc(5)Fuc(1)NeuAc(2)	4584.01	4584.04	4	5.2	8.44	460.93	112.82
Q13641	Trophoblast glycoprotein	272	VLHNGTLAELQGLPHIR	Hex(6)HexNAc(5)Fuc(2)NeuAc(1)	4438.98	4438.99	4	4.5	7.56	407.79	20.26
Q13641	Trophoblast glycoprotein	272	VLHNGTLAELQGLPHIR	Hex(6)HexNAc(5)Fuc(2)NeuAc(2)	4730.07	4729.08	4	2.1	8.64	460.17	31.2
Q13641	Trophoblast glycoprotein	272	VLHNGTLAELQGLPHIR	Hex(6)HexNAc(5)Fuc(4)	4440	4438.99	4	0.6	2.37	165.03	19.76
Q13740	CD166 antigen	153	KLGDC*ISEDSYPDGNITWYR	Hex(4)HexNAc(4)Fuc(3)NeuAc(1)	4578.87	4577.91	3	8.2	6.49	156.98	156.98
Q13740	CD166 antigen	153	KLGDC*ISEDSYPDGNITWYR	Hex(5)HexNAc(4)Fuc(2)NeuAc(1)	4594.87	4594.88	3	1.7	7.92	335	40.71
Q13740	CD166 antigen	153	KLGDC*ISEDSYPDGNITWYR	Hex(5)HexNAc(4)NeuAc(2)	4593.85	4594.88	3	5.5	7.05	290.12	11.79
Q13740	CD166 antigen	153	KLGDC*ISEDSYPDGNITWYR	Hex(5)HexNAc(5)Fuc(3)	4652.91	4653.91	4	-1.3	6.48	377.87	315.54
Q13740	CD166 antigen	154	LGDC*ISEDSYPDGNITWYR	Hex(5)HexNAc(4)Fuc(3)NeuAc(1)	4612.83	4611.82	3	-1.4	5.53	252.33	46.27
Q13740	CD166 antigen	154	LGDC*ISEDSYPDGNITWYR	Hex(5)HexNAc(5)Fuc(1)NeuAc(1)	4523.8	4523.82	3	5.7	7.53	331.44	12.4
Q13740	CD166 antigen	154	LGDC*ISEDSYPDGNITWYR	Hex(5)HexNAc(5)Fuc(3)	4524.82	4523.82	3	1.9	6.7	312.82	24.47
Q13740	CD166 antigen	154	LGDC*ISEDSYPDGNITWYR	Hex(7)HexNAc(2)	3801.51	3801.53	3	4.8	4.18	178.98	61.94
Q13740	CD166 antigen	473	IIISPEENVTLTC*TAENQLER	Hex(5)HexNAc(3)Fuc(1)	3995.78	3995.82	3	9.6	2.65	210.37	179.55
Q13740	CD166 antigen	473	IIISPEENVTLTC*TAENQLER	Hex(5)HexNAc(4)Fuc(1)NeuAc(1)	4489.95	4489.98	4	6.7	7.49	498.91	44.42
Q13740	CD166 antigen	473	IIISPEENVTLTC*TAENQLER	Hex(5)HexNAc(4)Fuc(2)NeuAc(1)	4636.01	4637.06	3	8.9	7.32	293.15	210.68
Q13740	CD166 antigen	473	IIISPEENVTLTC*TAENQLER	Hex(5)HexNAc(4)Fuc(3)	4490.97	4489.98	4	2.9	5.97	425.49	12.76
Q13740	CD166 antigen	473	IIISPEENVTLTC*TAENQLER	Hex(6)HexNAc(5)Fuc(1)NeuAc(1)	4855.09	4855.11	4	5.1	6.77	401.82	28.91
Q13740	CD166 antigen	473	IIISPEENVTLTC*TAENQLER	Hex(6)HexNAc(5)Fuc(1)NeuAc(2)	5146.18	5146.21	4	5.2	6.59	325.1	25.07
Q13740	CD166 antigen	473	IIISPEENVTLTC*TAENQLER	Hex(8)HexNAc(2)	4132.8	4132.81	3	3.4	7.64	333.41	275.11
Q13740	CD166 antigen	473	IIISPEENVTLTC*TAENQLER	Hex(9)HexNAc(2)	4294.85	4294.88	3	6.2	7.55	302.34	203.83
Q14112	Nidogen-2	700	IHQNITYQVC*R	Hex(8)HexNAc(2)	3134.3	3134.32	3	8.5	2.34	147.97	108.02
Q14118	Dystroglycan	138	LGANGSHIPQTSSVFSIEVYPEDHSELQSVR	Hex(8)HexNAc(2)	5086.23	5086.26	4	5.8	9.47	407.01	395.94
Q14126	Desmoglein-2	181	INATDADEPNTLNSK	Hex(4)HexNAc(5)Fuc(1)	3412.43	3412.44	3	4.1	2.44	194.89	51.49
Q14126	Desmoglein-2	181	INATDADEPNTLNSK	Hex(4)HexNAc(5)Fuc(2)	3558.48	3558.51	3	6.1	5.41	268.32	267.45
Q14126	Desmoglein-2	181	INATDADEPNTLNSK	Hex(4)HexNAc(5)Fuc(3)	3704.54	3704.56	3	5.6	5.89	383.44	226.38
Q14126	Desmoglein-2	181	INATDADEPNTLNSK	Hex(5)HexNAc(4)Fuc(1)NeuAc(1)	3662.5	3662.51	3	4.2	6.3	321.43	140.63
Q14126	Desmoglein-2	181	INATDADEPNTLNSK	Hex(5)HexNAc(4)Fuc(1)NeuAc(2)	3953.59	3953.6	3	1.9	6.98	288.27	172.14
Q14126	Desmoglein-2	459	YVQNGTYTVK	Hex(5)HexNAc(4)Fuc(1)NeuAc(2)	3523.43	3523.43	3	1.2	2.27	149.27	51.23
Q16563	Synaptophysin-like protein 1	56	GQTEIQVNC*PPAVTENK	Hex(6)HexNAc(3)NeuAc(1)	3757.56	3757.57	3	1.7	6.11	221.86	63.64
Q16563	Synaptophysin-like protein 1	56	GQTEIQVNC*PPAVTENK	Hex(7)HexNAc(2)	3425.44	3425.45	3	3.7	6.8	281.28	242.94
Q5ZPR3	CD276 antigen	74	QLVHSFAEGQDQGSAYANR	Hex(5)HexNAc(4)Fuc(1)NeuAc(2)	4428.8	4428.81	4	2.4	7.07	390.02	11.18
Q5ZPR3	CD276 antigen	74	QLVHSFAEGQDQGSAYANR	Hex(5)HexNAc(4)Fuc(2)NeuAc(1)	4283.76	4284.8	3	8.2	5.56	121.71	56.25
Q5ZPR3	CD276 antigen	311	TALFPDLLAQGNASLR	Hex(4)HexNAc(5)Fuc(2)NeuAc(1)	3933.74	3933.74	3	1.6	5.44	218.83	124.17
Q68CR1	Protein sel-1 homolog 3	379	SYHNQTISFR	Hex(9)HexNAc(2)	3117.24	3117.26	3	4.9	4.99	167.55	83.6
Q6UY14	ADAMTS-like protein 4	766	C*#GHLPRPNITQSC*QLR	Hex(8)HexNAc(2)	3622.51	3622.53	3	5.7	2.3	149.66	110.35
Q6UY14	ADAMTS-like protein 4	994	EVQC*LSTNQTLSTR	Hex(9)HexNAc(2)	3501.43	3501.46	3	8.3	2.31	167.86	104.1
Q6YHK3	CD109 antigen	245	HLNGTITAK	Hex(8)HexNAc(2)	2657.12	2657.13	3	3.6	5.28	221.14	109.31
Q6YHK3	CD109 antigen	337	NVSTNVFFK	Hex(8)HexNAc(2)	2758.13	2758.14	2	2.2	5.99	347.94	180.3
Q6YHK3	CD109 antigen	418	INYTVPQSGTFK	Hex(9)HexNAc(2)	3219.33	3219.34	3	0.7	5.92	273.02	157.69
Q6YHK3	CD109 antigen	1082	GISDNYTLALITYALSSVGSPK	Hex(9)HexNAc(2)	4134.83	4134.84	3	4.2	7.63	441.15	379.95
Q6ZRP7	Sulfhydryl oxidase 2	252	LGVSSVPSC*YLIYPNGSHGLINVVKPLR	Hex(5)HexNAc(4)Fuc(2)NeuAc(2)	5536.53	5536.56	4	5.4	7.47	252.06	50.3
Q7Z408	CUB and sushi domain-containing protein 2	677	RGFNITFTTFR	Hex(5)HexNAc(4)NeuAc(2)	3564.49	3564.49	3	1.1	2.1	300.88	36.96
Q86SQ4	G-protein coupled receptor 126	813	SFGGWNTSGC*VAHR	Hex(8)HexNAc(2)	3238.26	3238.28	3	4.3	2.33	126.09	77.69
Q8IWA5	Choline transporter-like protein 2	407	TC*NPETFPSSNESR	Hex(5)HexNAc(4)Fuc(2)NeuAc(1)	3831.48	3831.49	3	3.5	6.19	262.24	174.2
Q8IWA5	Choline transporter-like protein 2	407	TC*NPETFPSSNESR	Hex(8)HexNAc(2)	3328.27	3328.28	3	2.4	4.9	205.45	154.07
Q8IWB1	Inositol 1,4,5-trisphosphate receptor-interacting protein	26	ENATVPENEEEIIRK	Hex(8)HexNAc(2)	3473.47	3473.48	3	4.1	6.76	332.34	234.29
Q8IZA0	Dyslexia-associated protein KIAA0319-like protein	879	ALEVNTVTC*QLNC*SDHGHC*DSFTK	Hex(7)HexNAc(2)	4333.73	4333.75	4	5.5	8.62	476.49	344.18
Q8IZA0	Dyslexia-associated protein KIAA0319-like protein	879	ALEVNTVTC*QLNC*SDHGHC*DSFTKR	Hex(8)HexNAc(2)	4651.88	4650.89	5	2	9.77	508.27	435.7
Q8WTV0	Scavenger receptor class B member 1	99	HKSNITFNNNDTVSFLEYR	Hex(7)HexNAc(6)	4651.96	4652.95	3	-1.3	4.43	148.34	12.4
Q8WWI5	Choline transporter-like protein 1	131	FAEINGSALC*SYNLKPSEYTTSPK	Hex(6)HexNAc(2)	4055.76	4055.78	4	6.6	13.52	757.73	667.77
Q8WWI5	Choline transporter-like protein 1	131	FAEINGSALC*SYNLKPSEYTTSPK	Hex(7)HexNAc(2)	4217.81	4216.82	4	2.2	16.39	860.85	707.16
Q92542	Nicastrin	39	KIYIPLNK	Hex(8)HexNAc(2)	2691.2	2691.2	3	1.5	5.63	304.93	98.02
Q92542	Nicastrin	39	KIYIPLNK	Hex(9)HexNAc(2)	2853.25	2853.27	3	5.5	5.68	252.83	128.09
Q92542	Nicastrin	39	KIYIPLNK	Hex(10)HexNAc(2)	3015.31	3015.32	3	3.4	4.02	206.66	86.03
Q92542	Nicastrin	40	IYIPLNK	Hex(9)HexNAc(2)	2725.16	2725.16	2	0.5	5.3	337.53	195.04
Q92542	Nicastrin	372	TSLELWMHTDPVSQKNESVR	Hex(5)HexNAc(5)NeuAc(1)	4473.91	4473.93	4	4.1	3.93	138.72	52.94
Q92542	Nicastrin	372	TSLELWMHTDPVSQKNESVR	Hex(6)HexNAc(6)NeuAc(2)	5130.14	5131.19	5	8.7	3.85	129.36	74.2
Q92542	Nicastrin	415	RPNQSQPLPPSSLQR	Hex(8)HexNAc(2)	3407.5	3407.51	3	2.9	3.75	115.54	64.57
Q92542	Nicastrin	433	ARNISGVVLADHSGAFHNK	Hex(8)HexNAc(2)	3695.62	3695.65	4	8.2	10.52	624.78	552.67
Q92542	Nicastrin	435	NISGVVLADHSGAFHNK	Hex(6)HexNAc(2)	3144.37	3144.39	4	3.7	8.73	544.48	429.39
Q92542	Nicastrin	435	NISGVVLADHSGAFHNK	Hex(7)HexNAc(2)	3306.43	3306.44	4	4.7	9.65	597.57	426.95
Q92542	Nicastrin	435	NISGVVLADHSGAFHNK	Hex(8)HexNAc(2)	3468.48	3468.49	4	4.4	9.65	580.13	437.5
Q92542	Nicastrin	435	NISGVVLADHSGAFHNK	Hex(9)HexNAc(2)	3630.53	3630.55	4	5.1	13.31	731.79	570.24
Q92542	Nicastrin	529	ANNSWFQSILR	Hex(9)HexNAc(2)	3200.31	3200.32	3	0.9	6.58	310.18	310.18
Q92545	Transmembrane protein 131	287	EADNHTAFIR	Hex(7)HexNAc(2)	2714.09	2714.12	3	8.2	2.66	112.4	74.44
Q92626	Peroxidasin homolog	1175	VYC*NLSAAHTFEDLKNEIKNPEIR	Hex(9)HexNAc(2)	4726.06	4726.08	5	4.1	9.08	539.64	477.5
Q92626	Peroxidasin homolog	1362	QGEHLSNSTSAFSTR	Hex(8)HexNAc(2)	3324.34	3324.35	3	3.2	4.43	215.62	133.31
Q92626	Peroxidasin homolog	1410	LSTTEC*VDAGGESHANNTK	Hex(6)HexNAc(2)	3369.35	3369.38	3	9.6	4.92	131.76	91.83
Q92626	Peroxidasin homolog	1410	LSTTEC*VDAGGESHANNTK	Hex(8)HexNAc(2)	3693.46	3693.49	3	8.3	6.4	167.65	141.05
Q96J42	Thioredoxin domain-containing protein 15	128	ESLFSLDGAGAHFPDREEEYYTEPEVAESDAAPTEDSNNTESLK	Hex(3)HexNAc(6)	6551.76	6551.73	4	-3.7	6.4	156.16	156.16
Q96J42	Thioredoxin domain-containing protein 15	128	ESLFSLDGAGAHFPDREEEYYTEPEVAESDAAPTEDSNNTESLK	Hex(8)HexNAc(2)	6549.71	6549.75	4	7	8.67	348.39	348.39
Q96J42	Thioredoxin domain-containing protein 15	289	IFIFNQTGIEAK	Hex(8)HexNAc(2)	3083.33	3083.34	3	2.5	3.21	270.01	159.7
Q96KA5	Cleft lip and palate transmembrane protein 1-like protein	89	TVNVSVPK	Hex(8)HexNAc(2)	2546.07	2546.08	2	1.9	6.17	341.32	172.84
Q96KA5	Cleft lip and palate transmembrane protein 1-like protein	224	DLMVINR	Hex(8)HexNAc(2)	2563.05	2563.06	2	4.9	2.86	266.03	88.07
Q96PQ0	VPS10 domain-containing receptor SorCS2	321	YVTC*AIHNC*SEK	Hex(9)HexNAc(2)	3346.29	3346.3	3	4.1	4.56	148.44	81.89
Q99523	Sortilin	156	DITDLINNTFIR	Hex(5)HexNAc(4)Fuc(1)NeuAc(1)	3494.49	3494.51	3	5	3.19	135.42	46.48
Q99523	Sortilin	393	HLYTTTGGETDFTNVTSLR	Hex(9)HexNAc(2)	3977.65	3977.67	3	3.4	8.26	475.7	352.11
Q99523	Sortilin	393	HLYTTTGGETDFTNVTSLR	Hex(10)HexNAc(2)	4139.71	4139.73	3	5.1	8.26	465.49	350.85
Q99715	Collagen alpha-1(XII) chain	1758	NLQVYNATSNSLTVK	Hex(9)HexNAc(2)	3516.5	3516.51	3	4.3	2.01	179.52	133.54
Q9H0X4	Protein ITFG3	378	YKPDTLAVAVENGTGTDR	Hex(8)HexNAc(2)	3609.53	3609.54	3	2.8	7.27	284.61	203.82
Q9H330	Transmembrane protein 245	545	ILGDKVNNTAVIEK	Hex(8)HexNAc(2)	3216.44	3216.45	3	4.5	4.03	218.25	185.89
Q9H330	Transmembrane protein 245	545	ILGDKVNNTAVIEK	Hex(9)HexNAc(2)	3378.49	3378.5	3	3.4	3.76	133.7	133.7
Q9H5V8	CUB domain-containing protein 1	96	NIDC*MSGPC*PFGEVQLQPSTSLLPTLNR	Hex(3)HexNAc(6)	4836.13	4835.12	4	-1.2	4.57	230.22	29.37
Q9H5V8	CUB domain-containing protein 1	96	NIDC*MSGPC*PFGEVQLQPSTSLLPTLNR	Hex(8)HexNAc(2)	4834.08	4834.1	4	5.7	6.53	288.65	275.31
Q9H5V8	CUB domain-containing protein 1	262	ASVSFLNFNLSNC*ER	Hex(5)HexNAc(4)Fuc(1)NeuAc(2)	4108.66	4108.68	3	5.2	4.15	183.75	11.51
Q9H5V8	CUB domain-containing protein 1	328	LQFQVLVQHPQNESNK	Hex(9)HexNAc(2)	3773.63	3773.64	3	2.5	2.57	132.68	132.68
Q9H5V8	CUB domain-containing protein 1	467	LQQHTHEKPC*NTSFSYLVASAIPSQDLYFGSFC*PGGSIK	Hex(5)HexNAc(4)Fuc(2)NeuAc(1)	6577.87	6577.87	5	-0.5	10.17	382.61	17.35
Q9H5V8	CUB domain-containing protein 1	467	LQQHTHEKPC*NTSFSYLVASAIPSQDLYFGSFC*PGGSIK	Hex(5)HexNAc(4)NeuAc(2)	6576.85	6577.87	5	2.1	10.32	468.54	13.72
Q9H5V8	CUB domain-containing protein 1	511	QNISVTLR	Hex(8)HexNAc(2)	2633.12	2633.12	2	0.3	2.07	265.12	47.48
Q9H5V8	CUB domain-containing protein 1	629	PSFHHHSFWVNISNC*SPTSGK	Hex(8)HexNAc(2)	4128.69	4128.71	4	3.8	7.51	348.21	31.16
Q9H7M9	Platelet receptor Gi24	35	VATPYSLYVC*PEGQNVTLTC*R	Hex(6)HexNAc(5)NeuAc(3)	5289.16	5289.18	4	2.5	2.4	120.01	37.78
Q9HAV5	Tumor necrosis factor receptor superfamily member 27	73	VNC*TATSNAVC*GDC*LPR	Hex(5)HexNAc(4)Fuc(1)NeuAc(2)	4245.65	4244.67	3	5.6	5.44	222.98	69.06
Q9HAV5	Tumor necrosis factor receptor superfamily member 27	73	VNC*TATSNAVC*GDC*LPR	Hex(5)HexNAc(4)Fuc(2)NeuAc(1)	4100.61	4100.63	3	2.9	4.32	217.92	20.35
Q9HAV5	Tumor necrosis factor receptor superfamily member 27	73	VNC*TATSNAVC*GDC*LPR	Hex(6)HexNAc(5)Fuc(1)NeuAc(1)	4319.69	4319.7	3	4	5.74	235.59	71.24
Q9HCU4	Cadherin EGF LAG seven-pass G-type receptor 2	2052	SQQLALLLRNATQHTAGYFGSDVK	Hex(6)HexNAc(5)NeuAc(1)	4897.18	4898.18	3	-0.5	4.67	57.95	53.68
Q9HDC9	Adipocyte plasma membrane-associated protein	157	AGPNGTLFVADAYK	Hex(3)HexNAc(3)Fuc(1)	2665.18	889.063	3	-0.2	6.77	505.02	138.25
Q9HDC9	Adipocyte plasma membrane-associated protein	157	AGPNGTLFVADAYK	Hex(3)HexNAc(4)Fuc(1)	2868.26	956.755	3	-1.6	2.6	233.62	78.08
Q9HDC9	Adipocyte plasma membrane-associated protein	157	AGPNGTLFVADAYK	Hex(4)HexNAc(3)Fuc(2)	2973.29	991.767	3	0.2	5.17	334.53	173.3
Q9HDC9	Adipocyte plasma membrane-associated protein	157	AGPNGTLFVADAYK	Hex(6)HexNAc(2)	2802.2	2802.19	2	-1.1	6.84	445.59	299.3
Q9HDC9	Adipocyte plasma membrane-associated protein	157	AGPNGTLFVADAYK	Hex(7)HexNAc(2)	2964.25	2964.26	3	2.9	3.93	214.75	214.75
Q9HDC9	Adipocyte plasma membrane-associated protein	157	AGPNGTLFVADAYK	Hex(8)HexNAc(2)	3126.3	3126.3	3	-0.8	6.39	287.13	234.17
Q9P0T7	Transmembrane protein 9	38	NISGHIYNQNVSQK	Hex(6)HexNAc(2)	2980.28	2980.29	3	3.7	4.29	228.68	101.33
Q9UBG0	C-type mannose receptor 2	64	VTPAC*NTSLPAQR	Hex(5)HexNAc(4)Fuc(2)	3329.41	3329.4	3	-1.9	2.26	174.68	106.35
Q9UBG0	C-type mannose receptor 2	64	VTPAC*NTSLPAQR	Hex(5)HexNAc(4)Fuc(2)NeuAc(1)	3620.5	3620.53	3	7.9	2.76	141.31	54.4
Q9UBG0	C-type mannose receptor 2	1110	GTDPSLSPSPAALPPAPGTELSYLNGTFR	Hex(5)HexNAc(4)Fuc(1)	4682.1	4682.13	4	6.5	4.26	133.2	133.2
Q9UHG3	Prenylcysteine oxidase 1	350	HLQIESSNNSR	Hex(8)HexNAc(2)	3366.45	3366.45	3	1.4	7.21	310.31	232.63
Q9UHN6	Transmembrane protein 2	913	NNISLVK	Hex(9)HexNAc(2)	2652.1	2652.11	2	4.6	2.27	441.27	243.42
Q9UHX3	Adhesion G protein-coupled receptor E2	108	TFKNESENTC*QDVDEC*QQNPR	Hex(5)HexNAc(4)Fuc(1)NeuAc(2)	4949.91	4949.91	4	1	7.29	364.02	29.62
Q9UIQ6	Leucyl-cystinyl aminopeptidase	144	KNQSIGLIQPFATNGK	Hex(8)HexNAc(2)	3418.53	3418.54	3	4.1	5.12	125.28	125.06
Q9UIQ6	Leucyl-cystinyl aminopeptidase	821	SALLEFAC*THNLGNC*STTAMK	Hex(5)HexNAc(5)NeuAc(1)	4442.82	4441.84	4	6.4	4.31	195.61	118.54
Q9UJ14	Gamma-glutamyltransferase 7	521	TANHSAPSLENSVQPGK	Hex(7)HexNAc(2)	3277.38	3277.39	3	2.3	5.02	181.49	100.31
Q9UJ14	Gamma-glutamyltransferase 7	521	TANHSAPSLENSVQPGK	Hex(8)HexNAc(2)	3439.44	3439.45	3	2.9	5.25	151.23	91.74
Q9UJ14	Gamma-glutamyltransferase 7	521	TANHSAPSLENSVQPGK	Hex(9)HexNAc(2)	3601.49	3601.5	3	2.7	4.75	153.46	83.6
Q9ULF5	Zinc transporter ZIP10	327	DLNEDDHHHEC*LNVTQLLK	Hex(5)HexNAc(4)Fuc(3)	4390.84	4389.86	4	6.5	2.52	184.9	132.1
Q9UMF0	Intercellular adhesion molecule 5	200	AELDLRPHGLGLFENSSAPR	Hex(9)HexNAc(2)	4043.76	4044.78	4	4.6	7.43	376.7	177.09
Q9UMF0	Intercellular adhesion molecule 5	380	SFFC*DATLDVDGETLIKNR	Hex(5)HexNAc(4)Fuc(2)NeuAc(2)	4697.94	4698.93	3	-3.6	2.27	45.12	19.18
Q9Y337	Kallikrein-5	168	DVRPINVSSHC*PSAGTK	Hex(8)HexNAc(2)	3527.48	3527.5	3	3.3	2.17	35.24	35.24
Q9Y337	Kallikrein-5	168	DVRPINVSSHC*PSAGTK	Hex(9)HexNAc(2)	3689.54	3689.54	4	0.2	6.77	370.81	233.79
Q9Y337	Kallikrein-5	168	DVRPINVSSHC*PSAGTK	Hex(10)HexNAc(2)	3851.59	3851.61	4	6.6	6.96	286.33	160.56
Q9Y5Y6	Suppressor of tumorigenicity 14 protein	766	GEIRVINQTTC*ENLLPQQITPR	Hex(7)HexNAc(5)Fuc(1)	4876.18	4876.22	4	7.1	3.84	69.42	69.42
Q9Y5Y6	Suppressor of tumorigenicity 14 protein	770	VINQTTC*ENLLPQQITPR	Hex(6)HexNAc(2)	3503.58	3503.59	3	3.4	7.18	426.97	333.34
Q9Y5Y6	Suppressor of tumorigenicity 14 protein	770	VINQTTC*ENLLPQQITPR	Hex(7)HexNAc(2)	3665.64	3665.63	3	-0.3	11.92	656.35	583.07
Q9Y5Y6	Suppressor of tumorigenicity 14 protein	770	VINQTTC*ENLLPQQITPR	Hex(9)HexNAc(2)	3989.74	3989.74	3	0	6.8	251	217.53
Q9Y624	Junctional adhesion molecule A	179	STRAFSNSSYVLNPTTGELVFDPLSASDTGEYSC*EAR	Hex(6)HexNAc(5)	6016.56	6017.51	4	-8.1	5.06	193.22	112.9
Q9Y624	Junctional adhesion molecule A	179	STRAFSNSSYVLNPTTGELVFDPLSASDTGEYSC*EAR	Hex(6)HexNAc(5)	6016.56	6017.51	4	-8.1	6.39	252.56	252.56
Q9Y624	Junctional adhesion molecule A	182	AFSNSSYVLNPTTGELVFDPLSASDTGEYSC*EAR	Hex(5)HexNAc(3)Fuc(1)NeuAc(1)	5541.32	5541.35	4	5.3	18.33	983.69	912.57
Q9Y624	Junctional adhesion molecule A	182	AFSNSSYVLNPTTGELVFDPLSASDTGEYSC*EAR	Hex(5)HexNAc(4)Fuc(1)NeuAc(1)	5744.4	5745.44	4	7.3	4.83	53.42	41.57
Q9Y624	Junctional adhesion molecule A	182	AFSNSSYVLNPTTGELVFDPLSASDTGEYSC*EAR	Hex(5)HexNAc(4)Fuc(1)NeuAc(2)	6035.49	6036.56	4	9.9	10.1	593.59	10.62
Q9Y624	Junctional adhesion molecule A	182	AFSNSSYVLNPTTGELVFDPLSASDTGEYSC*EAR	Hex(5)HexNAc(4)Fuc(2)NeuAc(1)	5890.46	5890.49	4	5.6	11.03	598.02	47.23
Q9Y624	Junctional adhesion molecule A	182	AFSNSSYVLNPTTGELVFDPLSASDTGEYSC*EAR	Hex(5)HexNAc(4)Fuc(3)	5745.42	5745.46	4	7.7	6.31	229.91	218.02
Q9Y624	Junctional adhesion molecule A	182	AFSNSSYVLNPTTGELVFDPLSASDTGEYSC*EAR	Hex(5)HexNAc(4)NeuAc(2)	5889.44	5890.49	4	8.5	12.33	674.6	14.44
Q9Y624	Junctional adhesion molecule A	182	AFSNSSYVLNPTTGELVFDPLSASDTGEYSC*EAR	Hex(5)HexNAc(5)Fuc(4)	6094.56	6095.57	4	1.5	2.27	19.91	19.91
Q9Y624	Junctional adhesion molecule A	182	AFSNSSYVLNPTTGELVFDPLSASDTGEYSC*EAR	Hex(6)HexNAc(3)Fuc(2)	5558.34	5557.35	4	3.5	9.58	473.02	12.83
Q9Y624	Junctional adhesion molecule A	182	AFSNSSYVLNPTTGELVFDPLSASDTGEYSC*EAR	Hex(6)HexNAc(3)NeuAc(1)	5557.32	5557.35	4	6.6	9.34	512.67	37.86
Q9Y624	Junctional adhesion molecule A	182	AFSNSSYVLNPTTGELVFDPLSASDTGEYSC*EAR	Hex(6)HexNAc(5)Fuc(3)NeuAc(1)	6401.65	6401.68	4	5.6	4.48	132.56	49.62
Q9Y624	Junctional adhesion molecule A	182	AFSNSSYVLNPTTGELVFDPLSASDTGEYSC*EAR	Hex(7)HexNAc(2)	5225.19	5224.21	4	4.2	8.72	410.68	375.98
Q9Y639	Neuroplastin	160	DSPVLPVTLQC*NLTSSSHTLTYSYWTK	Hex(6)HexNAc(2)	4476.99	4478	3	1.8	5.9	86.78	86.78
Q9Y639	Neuroplastin	160	DSPVLPVTLQC*NLTSSSHTLTYSYWTK	Hex(8)HexNAc(2)	4801.1	4801.12	4	4.5	7.05	340.3	317.64
Q9Y639	Neuroplastin	228	ANATIEVK	Hex(8)HexNAc(2)	2548.05	2548.07	2	4.4	6.02	515.35	174.59
Q9Y639	Neuroplastin	228	ANATIEVK	Hex(9)HexNAc(2)	2710.11	2710.12	2	3.9	5.39	345.23	72.71
Unassigned glycopeptides
			NITR	Hex(6)HexNAc(5)Fuc(2)NeuAc(3)	3656.41	3656.4	3	-1.4
			VNR	Hex(4)HexNAc(4)Fuc(2)NeuAc(1)	2431.97	2431.97	2	0.6
