# Supplementary material for: Membrane glycomics reveal heterogeneity and quantitative distribution of cell surface sialylation
Source: Royal Society of Chemistry journal article supplement (doi:10.1039/c8sc01875h), 2018-01-01
Supplement: c8sc01875h7.xlsx [file c8sc01875h7.xlsx]

## Sheet: PNT2 GSLs
Table S6. Summary of non-sialylated, sialylated, and SiaNAzylated cell membrane glycosphingolipids observed on PNT2. Identifications are arranged according to percent SiaNAz incorporation (high to low).
Neutral Mass	Composition (Hex_HexNAc_Sia_Fuc_Sulfate_Ceramide_Unsaturation)	Name*	Abundance				% Incorporation
			− ManNAz	+ ManNAz
			Control	− SiaNAz	+ 1SiaNAz	+ 2SiaNAz	1SiaNAz	2SiaNAz	Total
1808.95	3_1_2_0_0_d34_1	GD1(d34:1)	1351699	125868	502465	1026670	0.799679	0.620343	0.923947
1495.95	2_1_1_0_0_d44_1	GM2(d44:1)	417642	127494	1314067		0.911558
1327.76	2_1_1_0_0_d32_1	GM2(d32:1)	269985	62272.5	595940		0.905391
1383.82	2_1_1_0_0_d36_1	GM2(d36:1)	843383	210644	1.99791e+06		0.904624
1467.91	2_1_1_0_0_d42_1	GM2(d42:1)	4658988	1070394	7.77443e+06		0.878981
1355.79	2_1_1_0_0_d34_1	GM2(d34:1)	3985562	927988	6507469		0.875194
1439.83	2_1_1_0_0_d40_1	GM2(d40:1)	1589044	424192	2876359		0.871478
1353.77	2_1_1_0_0_d34_2	GM2(d34:2)	314974	84751.5	505606		0.85644
1465.89	2_1_1_0_0_d42_2	GM2(d42:2)	2644715	724314	3580864		0.831758
1629.96	3_1_1_0_0_d42_1	GM1(d42:1)	3271678	701696	3.33357e+06		0.826109
1545.88	3_1_1_0_0_d36_1	GM1(d36:1)	431905	123259	500136		0.802278
1657.99	3_1_1_0_0_d44_1	GM1(d44:1)	331749	126042	464013		0.78639
1517.83	3_1_1_0_0_d34_1	GM1(d34:1)	2325484	463640	1.59183e+06		0.774436
1601.92	3_1_1_0_0_d40_1	GM1(d40:1)	1020353	364199	1039973		0.740631
1180.74	2_0_1_0_0_d36_1	GM3(d36:1)	669662	160132	420276		0.724105
1152.71	2_0_1_0_0_d34_1	GM3(d34:1)	3270345	621908	1.44526e+06		0.69915
1627.95	3_1_1_0_0_d42_2	GM1(d42:2)	2006901	686066	1.3294e+06		0.659599
1292.85	2_0_1_0_0_d44_1	GM3(d44:1)	300009	85786.5	154505		0.64299
1836.99	3_1_2_0_0_d36_1	GD1(d36:1)	451284	234812	166170	250870	0.414407	0.384857	0.639777
1264.82	2_0_1_0_0_d42_1	GM3(d42:1)	3065982	635226	1.12789e+06		0.639714
1124.68	2_0_1_0_0_d32_1	GM3(d32:1)	238367	67744.5	119506		0.638215
1515.81	3_1_1_0_0_d34_2	GM1(d34:2)	163884	71608	111595		0.609133
1236.8	2_0_1_0_0_d40_1	GM3(d40:1)	1117773	298482	462352		0.60769
1493.9	2_1_1_0_0_d44_2	GM2(d44:2)	238002	333164	482395		0.59149
1262.8	2_0_1_0_0_d42_2	GM3(d42:2)	1503819	360884	469650		0.565479
1150.68	2_0_1_0_0_d34_2	GM3(d34:2)	211331	83518.5	83871		0.501053
1655.96	3_1_1_0_0_d44_2	GM1(d44:2)	269350	372824	264900		0.415383
1921.07	3_1_2_0_0_d42_1	GD1(d42:1)			252590	613120
1919.05	3_1_2_0_0_d42_2	GD1(d42:2)			83038	380888
861.615	2_0_0_0_0_d34_1	LacCer(d34:1)	883245	887960
945.708	2_0_0_0_0_d40_1	LacCer(d40:1)	185413	167844
973.741	2_0_0_0_0_d42_1	LacCer(d42:1)	405168	485877
971.724	2_0_0_0_0_d42_2	LacCer(d42:2)	184364	155296
995.637	3_0_0_0_0_d32_1	Gb3(d32:1)	778107	615900
1009.65	3_0_0_0_0_d33_1	Gb3(d33:1)	281947	148608
1023.67	3_0_0_0_0_d34_1	Gb3(d34:1)	15710515	13051170
1021.65	3_0_0_0_0_d34_2	Gb3(d34:2)	554397	423064
1037.68	3_0_0_0_0_d35_1	Gb3(d35:1)	211318	174404
1051.7	3_0_0_0_0_d36_1	Gb3(d36:1)	2600932	2104356
1049.68	3_0_0_0_0_d36_2	Gb3(d36:2)	408952	260130
1079.73	3_0_0_0_0_d38_1	Gb3(d38:1)	234956	191228
1107.76	3_0_0_0_0_d40_1	Gb3(d40:1)	2651540	2.08151e+06
1105.74	3_0_0_0_0_d40_2	Gb3(d40:2)	580182	404745
1121.78	3_0_0_0_0_d41_1	Gb3(d41:1)	603525	416787
1119.76	3_0_0_0_0_d41_2	Gb3(d41:2)	326777	179430
1135.8	3_0_0_0_0_d42_1	Gb3(d42:1)	6908207	6.86589e+06
1133.78	3_0_0_0_0_d42_2	Gb3(d42:2)	5140544	3.44273e+06
1149.81	3_0_0_0_0_d43_1	Gb3(d43:1)	280018	266636
1147.79	3_0_0_0_0_d43_2	Gb3(d43:2)	170189	123462
1163.83	3_0_0_0_0_d44_1	Gb3(d44:1)	317461	407232
1161.81	3_0_0_0_0_d44_2	Gb3(d44:2)	417712	345758
1198.72	3_1_0_0_0_d32_1	Gb4(d32:1)	521646	453482
1226.75	3_1_0_0_0_d34_1	Gb4(d34:1)	12103409	1.07532e+07
1224.74	3_1_0_0_0_d34_2	Gb4(d34:2)	515278	454884
1240.76	3_1_0_0_0_d35_1	Gb4(d35:1)	164920	152781
1254.78	3_1_0_0_0_d36_1	Gb4(d36:1)	2536161	2192153
1252.76	3_1_0_0_0_d36_2	Gb4(d36:2)	636354	542086
1282.81	3_1_0_0_0_d38_1	Gb4(d38:1)	221391	218220
1310.84	3_1_0_0_0_d40_1	Gb4(d40:1)	2030048	1.74806e+06
1308.82	3_1_0_0_0_d40_2	Gb4(d40:2)	342581	282726
1324.86	3_1_0_0_0_d41_1	Gb4(d41:1)	494191	512750
1338.87	3_1_0_0_0_d42_1	Gb4(d42:1)	5878139	5241296
1336.86	3_1_0_0_0_d42_2	Gb4(d42:2)	3884935	3.02081e+06
1352.89	3_1_0_0_0_d43_1	Gb4(d43:1)	261691	302864
1350.86	3_1_0_0_0_d43_2	Gb4(d43:2)	200973	128284
1366.9	3_1_0_0_0_d44_1	Gb4(d44:1)	381094	463954
1364.88	3_1_0_0_0_d44_2	Gb4(d44:2)	384825	311847
*Nomenclature is as follows: Gangioside name (Number of hydroxyl groups Number of carbons:Degree of unsaturation). Abbreviations: Gb, globo series.
