# Supplementary material for: Membrane glycomics reveal heterogeneity and quantitative distribution of cell surface sialylation
Source: Royal Society of Chemistry journal article supplement (doi:10.1039/c8sc01875h), 2018-01-01
Supplement: c8sc01875h8.xlsx [file c8sc01875h8.xlsx]

## Sheet: Caco-2 GSLs
Table S7. Summary of non-sialylated, sialylated, and SiaNAzylated cell membrane glycosphingolipids observed on Caco-2. Identifications are arranged according to percent SiaNAz incorporation (high to low).
Neutral Mass	Composition (Hex_HexNAc_Sia_Fuc_Sulfate_Ceramide_Unsaturation)	Name*	Abundance			% Incorporation
			− ManNAz	+ ManNAz
			Control	− SiaNAz	+ SiaNAz
1658	3_1_1_0_0_d44_1	GM1(d44:1)	825866	858522	326964	0.275806
1545.88	3_1_1_0_0_d36_1	GM1(d36:1)	868773	1.07582e+06	365742	0.253712
1663.91	3_1_1_1_0_d34_1	Fuc-NeuAc-Lc4(d34:1)	509206	671478	204034	0.233045
1655.98	3_1_1_0_0_d44_2	GM1(d44:2)	532896	678774	205900	0.232741
1154.72	2_0_1_0_0_d34_0	GM3(d34:0)	315507	385199	111825	0.22499
1599.93	3_1_1_0_0_d40_2	GM1(d40:2)	493372	667753	175401	0.20803
1170.72	2_0_1_0_0_t34_0	GM3(t34:0)	440003	600069	141873	0.191219
1647.98	3_1_1_0_0_t42_0	GM1(t42:0)	1099102	1.35782e+06	319499	0.190482
1615.91	3_1_1_0_0_t40_2	GM1(t40:2)	512037	744412	168594	0.184658
1790.02	3_1_1_1_0_t42_2	Fuc-NeuAc-Lc4(t42:2)	557446	765249	168507	0.180461
1629.98	3_1_1_0_0_d42_1	GM1(d42:1)	4294859	5.66049e+06	1163759	0.170533
1152.71	2_0_1_0_0_d34_1	GM3(d34:1)	769286	1026587	189617	0.155909
1533.85	3_1_1_0_0_t34_1	GM1(t34:1)	2082733	2.78578e+06	508996	0.154486
1601.95	3_1_1_0_0_d40_1	GM1(d40:1)	999255	1.41312e+06	255984	0.153366
1882.98	3_2_1_1_0_t34_1	Fuc-HexNAc-NeuAc-Lc4(t34:1)	989952	1.16141e+06	204500	0.149717
1792.03	3_1_1_1_0_t42_1	Fuc-NeuAc-Lc4(t42:1)	459051	626986	97385.8	0.134442
1627.96	3_1_1_0_0_d42_2	GM1(d42:2)	1872519	4040449	554680	0.12071
1278.82	2_0_1_0_0_t42_2	GM3(t42:2)	474411	767842	99201.8	0.114414
1517.85	3_1_1_0_0_d34_1	GM1(d34:1)	5231825	6539224	725408	0.0998548
1535.87	3_1_1_0_0_t34_0	GM1(t34:0)	1225227	1.59692e+06	166591	0.0944654
1661.97	3_1_1_0_0_q42_1	GM1(q42:1)	815328	1.30073e+06	126952	0.0889221
1643.96	3_1_1_0_0_t42_2	GM1(t42:2)	3392061	5.86584e+06	559513	0.0870789
1168.71	2_0_1_0_0_t34_1	GM3(t34:1)	1114716	1489887	126280	0.0781355
1589.9	3_1_1_0_0_t38_1	GM1(t38:1)	175591	199964	16920.5	0.0780164
1659.99	3_1_1_0_0_d44_0	GM1(d44:0)	114807	119857	8521.69	0.0663794
1615.95	3_1_1_0_0_d41_1	GM1(d41:1)	1910171	2.58073e+06	163744	0.0596633
1645.97	3_1_1_0_0_t42_1	GM1(t42:1)	3521797	4.76078e+06	266998	0.0531044
2009.09	4_2_1_0_0_t42_2	Hex-HexNAc-Lc4(t42:2)	123627	183013	8874.3	0.0462474
1519.87	3_1_1_0_0_d34_0	GM1(d34:0)	2842150	3.56005e+06	118493	0.0322119
1180.73	2_0_1_0_0_d36_1	GM3(d36:1)	191026	206608	0
1236.81	2_0_1_0_0_d40_1	GM3(d40:1)	133836	208126	0
1196.73	2_0_1_0_0_t36_1	GM3(t36:1)	281864	399403	0
1282.85	2_0_1_0_0_t42_0	GM3(t42:0)	182546	285847	0
1280.84	2_0_1_0_0_t42_1	GM3(t42:1)	493462	776540	0
1603.92	3_1_1_0_0_d40_0	GM1(d40:0)	1243706	1.9398e+06	0
1551.85	3_1_1_0_0_q34_0	GM1(q34:0)	150004	189239	0
1663.97	3_1_1_0_0_q42_0	GM1(q42:0)	320946	502644	0
1591.9	3_1_1_0_0_t38_0	GM1(t38:0)	247752	269572	0
1619.95	3_1_1_0_0_t40_0	GM1(t40:0)	586998	773490	0
1676.01	3_1_1_0_0_t44_0	GM1(t44:0)	290744	430397	0
1674	3_1_1_0_0_t44_1	GM1(t44:1)	157509	861673	0
1665.92	3_1_1_1_0_d34_0	Fuc-NeuAc-Lc4(d34:0)	206171	212154	0
1747.99	3_1_1_1_0_d40_1	Fuc-NeuAc-Lc4(d40:1)	355020	452083	0
1774	3_1_1_1_0_d42_2	Fuc-NeuAc-Lc4(d42:2)	121583	156893	0
1679.9	3_1_1_1_0_t34_1	Fuc-NeuAc-Lc4(t34:1)	451215	545794	0
1720.92	3_2_1_0_0_d34_1	HexNAc-NeuAc-Lc4(d34:1)	147848	248702	0
1736.93	3_2_1_0_0_t34_1	HexNAc-NeuAc-Lc4(t34:1)	349292	454807	0
1847.04	3_2_1_0_0_t42_2	HexNAc-NeuAc-Lc4(t42:2)	243047	352178	0
1967.06	3_2_1_1_0_t40_1	Fuc-HexNAc-NeuAc-Lc4(t40:1)	176545	334130	0
1995.1	3_2_1_1_0_t42_1	Fuc-HexNAc-NeuAc-Lc4(t42:1)	435040	728784	0
1993.09	3_2_1_1_0_t42_2	Fuc-HexNAc-NeuAc-Lc4(t42:2)	474069	751704	0
1870.93	4_2_1_0_0_t32_1	Hex-HexNAc-Lc4(t32:1)	166010	170522	0
2011.11	4_2_1_0_0_t42_1	Hex-HexNAc-Lc4(t42:1)	478254	692132	0
*Nomenclature is as follows: Gangioside name and additional modifications (Number of hydroxyl groups (d, q, t) Number of carbons:Degree of unsaturation). Abbreviations: Lc, lacto series.
